# Supplementary material
Source: publisher figshare collection journal article supplement (https://brill.figshare.com/articles/dataset/_/25990861)
Supplement: Supplementary file 1 [file 1]

## Sheet: Compounds
Name	Formula	Calc. MW	RT [min]	mzCloud Best Match	KEGG ID	C1	C2	C3	C4	C5	R1	R2	R3	R4	R5	Ratio: (Rosemary) / (Control)	Log2 Fold Change: (Rosemary) / (Control)	P-value: (Rosemary) / (Control)
	C27 H35 N4 O8 P	574.218	9.607			163221	237905	154059	156271	480720	7.08098e+08	9.85775e+08	8.31812e+08	6.55954e+08	9.36933e+08	5096.23	12.32	3.10381e-07
	C29 H35 N5 O7	565.252	8.942			193960	267149	144571	444074	274086	6.69866e+08	8.3406e+08	3.69578e+08	9.91994e+08	5.44652e+08	2507.46	11.29	1.48082e-09
Retosiban	C27 H34 N4 O5	494.251	19.504			228107	178688	196922	320171	322545	4.77546e+08	7.30138e+08	5.0702e+08	7.29162e+08	4.77356e+08	2222.73	11.12	6.83535e-11
	C33 H43 N O4 P2 S	611.24	8.942			258542	205614	218295	211634	209937	3.85499e+08	4.69818e+08	2.02823e+08	5.60674e+08	2.90418e+08	1821.54	10.83	7.76213e-07
Gibberellin A24	C20 H26 O5	346.178	9.638			173300	137583	267327	496346	191400	2.82831e+08	2.66821e+08	1.8742e+08	2.81856e+08	1.40042e+08	1394.05	10.45	5.02738e-08
	C20 H29 O7 P	412.165	14.353			213464	182369	207064	161313	453029	2.4708e+08	2.70993e+08	3.82902e+08	1.33194e+08	2.76421e+08	1308.74	10.35	2.93953e-09
	C19 H27 O5 P	366.159	9.612			320014	303985	321739	315747	310385	3.06941e+08	4.29274e+08	3.71982e+08	3.0022e+08	4.38879e+08	1178.1	10.2	6.59011e-08
	C24 H27 N5 O2 S	449.187	18.742			292455	294653	287279	745189	303492	2.99827e+08	2.80969e+08	1.50491e+08	5.80302e+08	1.94121e+08	953.559	9.9	2.76042e-08
19(R)-hydroxy Prostaglandin A2	C23 H35 N O4 P2	451.203	7.767			1.00637e+06	860689	533150	1.48845e+06	962953	8.6479e+08	1.06625e+09	6.31143e+08	1.24919e+09	8.37137e+08	898.06	9.81	3.25109e-09
9-hydroxy-2Z,5E,7Z,11Z,14Z-Eicosapentaenoic acid	C20 H30 O3	318.219	24.571			400305	366025	243885	406569	500130	4.14169e+08	2.99828e+08	4.27108e+08	3.40746e+08	2.78419e+08	851.217	9.73	2.7212e-10
	C16 H30 N5 O2 P S	387.187	21.955			236627	176532	216728	258564	270747	2.07648e+08	1.82275e+08	1.1288e+08	2.76929e+08	1.59934e+08	770.302	9.59	1.76825e-08
	C17 H36 N5 O4 P S	437.223	8.121			112601	99381.3	94758.6	95868.7	90217.3	9.25202e+07	7.33721e+07	5.94324e+07	1.23503e+08	4.94278e+07	765.339	9.58	7.6697e-07
13,14-Dihydro-15-keto Prostaglandin J2	C20 H30 O4	316.204	22.868	86.8	C05957	178276	171844	175952	161005	156747	1.71292e+08	1.13005e+08	1.24463e+08	1.54715e+08	8.63557e+07	724.283	9.5	2.63568e-07
Terreusterpene C	C26 H36 O9	492.236	14.901			211891	182801	181285	187924	177832	1.28457e+08	2.02432e+08	1.22197e+08	1.60983e+08	1.0835e+08	702.712	9.46	8.81994e-08
	C20 H27 O7 P	410.149	11.142			332050	235190	483877	362546	774614	2.5233e+08	2.30207e+08	3.32754e+08	1.61797e+08	4.03969e+08	695.995	9.44	1.27158e-08
15:6(2Z,4E,6Z,8E,12E,14)(6Me,8Me,10Me[S],13Me)	C19 H26 O2	286.193	19.515			309011	303480	320332	368324	341906	2.05413e+08	3.07755e+08	2.08796e+08	3.01428e+08	1.90873e+08	651.811	9.35	2.60701e-08
6,3',4'-Trihydroxy-4-methoxy-5-methylaurone	C17 H14 O6	314.079	11.92			191905	163686	168507	186768	168754	1.09907e+08	1.83036e+08	1.07699e+08	9.42934e+07	1.02271e+08	638.203	9.32	1.41805e-07
Heterofibrin A2	C21 H30 O4	346.214	24.475			375508	409923	381715	369336	372069	2.86949e+08	1.95678e+08	2.35242e+08	2.82307e+08	2.24792e+08	626.463	9.29	1.74595e-08
	C20 H25 N O6 S	407.14	8.943			230478	206115	218821	212138	210432	1.30004e+08	1.53961e+08	6.63739e+07	1.84512e+08	9.64334e+07	612.826	9.26	3.24968e-06
DKxanthene 508	C27 H32 N4 O6	508.23	9.728			489130	388798	280166	825390	266736	2.23257e+08	2.26069e+08	1.48784e+08	3.26404e+08	1.46367e+08	574.224	9.17	2.9593e-08
		635.251	7.911			196102	143753	194170	134141	139616	6.52761e+07	7.98531e+07	1.92931e+08	4.95226e+07	1.11415e+08	555.486	9.12	1.76541e-06
	C21 H34 N8 O3 P2	508.224	7.606			114536	87944.7	91249.8	94284.7	80022.4	4.06347e+07	5.42822e+07	5.04585e+07	6.61453e+07	4.5376e+07	552.97	9.11	3.91339e-11
	C28 H36 N4 O5	508.267	17.727			319497	236745	270166	363284	358279	1.59611e+08	1.55494e+08	1.18292e+08	1.99786e+08	1.06653e+08	486.682	8.93	3.43037e-10
Cannabichromevarin	C19 H26 O2	286.193	14.894	92.8		209395	181254	180356	187597	178128	8.37707e+07	1.29747e+08	7.81488e+07	1.05849e+08	6.93809e+07	462.174	8.85	1.54229e-07
	C31 H29 N8 O11 P	720.169	7.098			142877	118028	102654	117783	98350.4	9.55579e+06	6.51965e+07	5.4347e+07	4.45473e+07	8.32583e+07	461.415	8.85	7.45635e-05
	C20 H29 N O2	315.22	15.02			322162	337844	247028	635642	405455	1.54821e+08	1.52569e+08	8.38343e+07	2.40716e+08	1.0575e+08	451.595	8.82	9.88102e-09
Gibberellin A24	C20 H26 O5	346.178	12.215			256120	277541	179561	423921	252068	1.44157e+08	1.14148e+08	8.42662e+07	1.6396e+08	7.31285e+07	445.682	8.8	2.42852e-09
(E)-12-[(2R)-1-[(Z)-octadec-9-enoyl]oxy-3-phosphonooxypropan-2-yl]oxy-4,12-dioxododec-2-enoic acid	C33 H57 O11 P	660.366	21.313			260983	204957	248026	236938	240884	1.37379e+08	1.04373e+08	1.04708e+08	1.17314e+08	8.52463e+07	434.683	8.76	6.17298e-10
2-Methoxyestradiol-17beta	C19 H26 O3	302.188	9.616		C05302	147347	126555	134216	135308	131456	5.97686e+07	5.59873e+07	3.92283e+07	5.93037e+07	2.92915e+07	417.143	8.7	1.11577e-06
2,3,4-Tri-O-acetyl-6-deoxy-1-thio-beta-L-galactopyranose	C12 H18 O7 S	306.077	5.63			1.10087e+07	6.63131e+06	5.12227e+06	7.70527e+06	6.45958e+06	2.57087e+09	2.75458e+09	2.32242e+09	2.92724e+09	2.77266e+09	415.389	8.7	1.84102e-07
barmastine	C27 H29 N7 O2	483.237	6.241			804724	505217	184322	200734	161322	1.50139e+08	8.22297e+07	5.73171e+07	1.20156e+08	5.84959e+07	409.646	8.68	2.26783e-06
Rosmarinic acid	C19 H12 N4 O4	360.084	7.099			748298	3.24628e+06	3.41037e+06	3.63266e+06	4.82774e+06	5.38799e+08	1.40709e+09	1.32347e+09	1.15349e+09	1.63916e+09	388.071	8.6	1.96744e-06
Coibacin A	C19 H24 O2	284.177	14.912			291409	263657	271927	272129	272724	1.05574e+08	1.67432e+08	8.74832e+07	1.37533e+08	7.75925e+07	387.956	8.6	1.44237e-06
	C26 H18 N10 O8	598.132	7.086			170465	182877	179351	193601	315343	3.88359e+07	6.92319e+07	9.0772e+07	6.73223e+07	1.07537e+08	378.572	8.56	2.27932e-08
	C48 H59 N4 O9 P S	898.375	15.043			203189	168204	180164	183930	184053	7.09115e+07	6.80134e+07	2.29266e+07	1.4399e+08	3.5873e+07	369.778	8.53	4.77227e-05
	C24 H27 N5 O2 S	449.187	7.373			173762	135595	149301	127444	116447	8.11464e+07	5.00724e+07	3.16416e+07	8.22138e+07	3.05547e+07	369.279	8.53	2.37742e-06
Epothilone K	C22 H31 N O4 S	405.197	7.768			147667	127044	130867	125355	117664	4.67703e+07	5.92175e+07	3.32207e+07	6.46656e+07	4.11118e+07	368.141	8.52	1.62377e-07
Gibberellin A24	C20 H26 O5	346.178	13.227			2.71362e+06	1.73764e+06	1.58953e+06	3.09036e+06	1.48018e+06	1.02907e+09	6.06463e+08	6.02027e+08	1.03388e+09	4.2701e+08	349.014	8.45	7.36926e-09
	C10 H31 N10 O6 P S	450.19	15.004			352139	297290	288624	670342	392222	1.18788e+08	1.20819e+08	7.11055e+07	1.75541e+08	8.80422e+07	337.332	8.4	4.91417e-09
Gibberellin A24	C20 H26 O5	346.178	14.3			1.02392e+06	774514	658064	1.69917e+06	677543	3.92129e+08	2.58684e+08	2.52803e+08	4.21679e+08	1.69049e+08	333.995	8.38	1.10927e-08
	C24 H29 N5 O2 S2	483.175	8.394			98484.9	79429.9	87798.4	116973	80259.5	2.81834e+07	3.14191e+07	1.33491e+07	4.96914e+07	2.30635e+07	321.002	8.33	2.2869e-06
Biochanin A	C16 H12 O5	284.068	14.487	98.7		174177	159282	196351	159703	139073	5.10522e+07	6.40903e+07	4.11847e+07	3.44943e+07	5.42166e+07	319.67	8.32	5.97033e-09
	C21 H21 N5 O2 S	407.14	15.022			1.91302e+06	1.99316e+06	1.30516e+06	3.46296e+06	2.10358e+06	6.59377e+08	6.33673e+08	3.41106e+08	1.00579e+09	4.40433e+08	317.924	8.31	1.78644e-08
	C24 H27 N5 O2 S	449.187	15.026			2.65397e+06	2.57706e+06	1.72831e+06	5.26954e+06	2.97781e+06	8.68348e+08	8.22833e+08	4.49985e+08	1.3124e+09	5.78259e+08	310.038	8.28	2.1149e-08
	C22 H33 N O4 S	407.213	8.322			102253	82972.4	85508.3	88053.1	78409.6	1.98187e+07	2.90852e+07	2.50751e+07	2.46576e+07	2.40679e+07	288.366	8.17	8.7779e-12
	C21 H22 N4 O2	362.173	8			245187	242900	227044	198069	175655	7.75516e+07	6.5196e+07	3.29992e+07	1.02284e+08	3.00973e+07	287.151	8.17	7.76955e-06
Coibacin A	C19 H24 O2	284.177	21.311			1.78324e+06	1.60177e+06	1.50079e+06	1.78078e+06	1.46549e+06	5.81021e+08	4.56965e+08	4.51834e+08	5.27244e+08	3.75263e+08	285.287	8.16	3.73645e-10
11-{[5-(Dimethylamino)-1-naphthyl]sulfonyl}undecanoic acid	C23 H33 N O4 S	419.213	8.121			258839	244144	295189	202692	147603	9.13658e+07	6.95904e+07	5.58792e+07	1.23255e+08	4.60234e+07	285.038	8.16	1.93492e-08
	C14 H31 N4 O2 P	318.219	8.123			110214	97860.4	93880.9	95575.8	90514.8	3.47661e+07	2.68641e+07	2.29058e+07	4.4019e+07	1.84821e+07	281.076	8.13	1.33671e-06
Neohesperidin	C28 H34 O15	610.19	6.718	98.7		339964	248715	379480	223190	184379	6.31148e+07	7.92244e+07	7.55753e+07	6.74901e+07	4.10591e+07	271.355	8.08	1.71162e-09
Solanapyrone K	C21 H29 N O4	359.209	15.024			2.14795e+06	2.19847e+06	1.51853e+06	4.78575e+06	2.67945e+06	5.94352e+08	5.87392e+08	3.42999e+08	8.93567e+08	4.2919e+08	267.182	8.06	2.92816e-08
Aldosterone	C21 H28 O5	360.193	20.89			1.41312e+06	832975	1.05945e+06	1.67507e+06	694048	4.51872e+08	1.88809e+08	2.6045e+08	4.15642e+08	1.44526e+08	245.834	7.94	1.052e-07
simenepag	C23 H29 N O5 S	431.176	21.956			504690	404179	397682	485411	503820	1.27634e+08	1.14682e+08	6.88902e+07	1.69299e+08	9.36985e+07	236.257	7.88	4.02577e-07
	C31 H39 N O4 S	521.262	8.942			148705	129760	134650	120840	128103	2.99126e+07	3.73032e+07	1.50534e+07	4.50809e+07	2.26838e+07	230.522	7.85	6.05612e-06
8,11,14,18-Eicosatetraynoic acid	C20 H28 O2	300.209	24.546			443847	393650	387382	563420	668563	1.13134e+08	7.67223e+07	1.1142e+08	1.02258e+08	8.22896e+07	230.39	7.85	6.45776e-10
Coibacin A	C19 H24 O2	284.177	7.767			151459	130661	134975	129676	122101	2.66802e+07	3.25465e+07	2.09131e+07	3.36021e+07	2.38842e+07	204.195	7.67	2.13404e-08
NP-021030	C9 H8 O4	162.03	7.099	79.9		197891	379587	280529	387229	477967	3.0973e+07	8.32186e+07	7.70102e+07	6.60121e+07	9.46219e+07	202.879	7.66	5.42751e-08
methyl 8R,9R-epoxy-13Z,15Z-eicosadien-4,6-diynoate	C19 H24 O3	300.172	13.222			258233	276689	244233	244402	233581	9.00625e+07	4.93144e+07	4.8987e+07	8.63802e+07	3.35296e+07	201.775	7.66	5.80231e-06
	C17 H26 N9 O P	403.199	15.022			1.1907e+07	1.21056e+07	8.22516e+06	2.26455e+07	1.35254e+07	2.46837e+09	2.43421e+09	1.47737e+09	3.67455e+09	1.83497e+09	201.081	7.65	1.39823e-08
	C20 H31 O4 P S	398.17	21.313			294896	259914	318496	272866	277638	6.67754e+07	4.93184e+07	5.53123e+07	5.73847e+07	4.5901e+07	199.225	7.64	3.14128e-10
8,11,14,18-Eicosatetraynoic acid	C20 H28 O2	300.209	17.73			467184	427240	473512	521209	556586	9.37136e+07	9.31838e+07	6.91539e+07	1.22713e+08	6.16943e+07	196.793	7.62	1.47517e-07
	C15 H29 N7 O4 S	403.199	8.942			150507	125554	131360	118881	127105	2.48232e+07	2.65744e+07	1.1548e+07	3.14483e+07	1.74677e+07	195.297	7.61	4.1735e-06
	C20 H38 N4 O2 P2 S	460.221	12.398			273741	231385	225472	277692	267934	5.16994e+07	4.96486e+07	4.45016e+07	7.90968e+07	3.91294e+07	185.302	7.53	1.16269e-07
Trichurusin F	C25 H36 O7	448.246	14.897			208759	179968	178345	184742	174693	3.24387e+07	5.16098e+07	2.99444e+07	3.99364e+07	2.63707e+07	180.247	7.49	3.90122e-07
	C28 H20 N4 O8	540.127	6.391			546222	392689	542348	361906	246238	5.8938e+07	7.03185e+07	4.95765e+07	7.173e+07	7.18515e+07	179.069	7.48	1.0572e-07
	C19 H12 N4 O5	376.079	6.517			197236	138987	164926	128218	105188	1.30859e+07	3.14839e+07	2.48232e+07	2.2217e+07	3.28428e+07	178.601	7.48	4.17858e-08
NP-008499	C28 H36 O10	514.218	14.916	60.8		323502	290513	297397	295404	293858	5.25533e+07	7.26282e+07	4.54754e+07	5.65767e+07	4.16731e+07	177.903	7.47	3.07558e-07
	C17 H30 N5 O5 P S	447.171	7.623			168701	133823	133286	131576	116452	2.83279e+07	2.28031e+07	1.45826e+07	4.16987e+07	1.51697e+07	171.084	7.42	3.35964e-06
	C24 H27 N5 O2 S	449.187	6.72			375250	279662	434833	260729	219659	7.5092e+07	4.74003e+07	3.12676e+07	8.21226e+07	3.50205e+07	169.491	7.41	1.42943e-07
	C33 H45 N O4 P2 S	613.256	7.062			186333	146102	151174	186179	152134	2.61361e+07	3.41159e+07	1.74868e+07	2.04864e+07	2.57422e+07	169.208	7.4	3.61456e-08
	C23 H31 N O5 S	433.192	21.498			652695	491703	545931	953469	434605	9.77946e+07	9.2335e+07	5.3031e+07	1.62587e+08	5.4555e+07	169.133	7.4	2.33022e-07
	C22 H32 N6 O7 S	524.208	7.451			131566	94369.4	96148.5	100841	86764.8	1.61616e+07	1.72193e+07	7.98853e+06	1.8195e+07	1.15141e+07	168.09	7.39	2.69802e-07
ethyl dibunate	C20 H28 O3 S	348.176	8.704			121481	106057	98297.3	97157.2	86037.5	2.03036e+07	1.6459e+07	8.69508e+06	3.07326e+07	1.20144e+07	167.441	7.39	7.51913e-06
	C30 H39 N O5 P2	555.231	14.871			175497	151287	149916	155286	139014	2.30488e+07	3.30011e+07	2.98196e+07	1.85245e+07	2.52177e+07	166.688	7.38	5.97236e-08
Cannabichromevarin	C19 H26 O2	286.193	21.314	92.8		1.10587e+07	9.72685e+06	1.00684e+07	1.30055e+07	1.00639e+07	2.02741e+09	1.67364e+09	1.64152e+09	1.86095e+09	1.4024e+09	166.228	7.38	8.77709e-12
DKxanthene 492	C27 H32 N4 O5	492.236	12.706			201523	168798	159718	227467	213847	2.98439e+07	3.39203e+07	2.7024e+07	3.49247e+07	3.33361e+07	165.421	7.37	5.25891e-11
	C22 H34 N6 O7	494.251	15.382			380378	291832	292546	252009	260315	4.08877e+07	6.25566e+07	4.56387e+07	5.45614e+07	4.82066e+07	165.186	7.37	2.92459e-11
8-Iso-15-keto-prostaglandin-F2β	C20 H32 O5	334.214	11.293	96.9		163827	151096	162589	166454	170015	3.11983e+07	3.21713e+07	2.15657e+07	2.66184e+07	1.47344e+07	162.478	7.34	2.8984e-06
	C24 H41 N4 O2 P3	510.246	10.01			149814	146020	149822	156352	180077	2.42821e+07	3.296e+07	1.11655e+07	3.00191e+07	1.20139e+07	162.073	7.34	2.0401e-05
	C38 H60 N O9 P3 S	799.32	7.153			130050	122423	116818	120868	110659	7.60747e+06	1.90951e+07	4.21371e+07	2.53634e+06	2.49536e+07	157.983	7.3	0.000678442
NP-000308	C16 H12 O6	300.063	11.47	97		220302	162826	173605	181847	167619	2.74137e+07	3.25038e+07	1.68522e+07	1.87384e+07	2.78705e+07	157.909	7.3	1.2871e-07
	C26 H32 N4 O3	448.246	19.511			304567	298576	314584	361058	334552	4.86817e+07	7.39543e+07	4.92428e+07	7.13829e+07	4.46288e+07	156.533	7.29	1.31969e-07
	C17 H32 N5 O5 P S	449.187	7.583			163362	139763	138963	128645	127180	3.81241e+07	2.1543e+07	1.32262e+07	3.34333e+07	1.56433e+07	155.027	7.28	8.08808e-06
	C19 H29 N7 O2 P2	449.187	7.792			173910	151841	158872	133534	122636	2.68926e+07	2.30747e+07	1.27501e+07	3.59485e+07	1.79188e+07	151.966	7.25	1.43001e-06
	C19 H13 N5 O7	423.08	7.124			341229	272814	229725	255255	206491	2.16944e+07	3.85135e+07	4.03081e+07	3.55393e+07	4.30547e+07	150.882	7.24	4.82253e-09
	C32 H48 N O4 P3 S	635.251	9.092			208476	175274	186854	178951	159508	2.31623e+07	2.64809e+07	6.76474e+07	8.89041e+06	6.33525e+07	147.979	7.21	0.000143464
Benoxathian	C19 H23 N O4 S	361.135	8.944			231484	206447	218572	211314	209039	3.07879e+07	3.66009e+07	1.55836e+07	4.35798e+07	2.25183e+07	145.697	7.19	9.66975e-06
	C25 H34 N6 O7	530.249	17.725			438260	422943	464146	505769	534577	6.66532e+07	6.93662e+07	5.1644e+07	7.84948e+07	4.66143e+07	143.604	7.17	2.21064e-08
Carnosol	C20 H26 O4	330.183	21.316			3.4255e+07	3.11127e+07	3.08375e+07	3.85567e+07	3.3362e+07	5.74721e+09	4.74171e+09	4.65514e+09	5.35709e+09	4.01784e+09	142.129	7.15	5.59937e-11
	C14 H27 N4 O3 P	330.183	14.914			290226	261655	268903	268142	267769	3.80546e+07	6.04372e+07	3.12209e+07	4.96678e+07	2.86421e+07	141.92	7.15	2.78706e-06
Virescenoside U	C26 H38 O8	478.256	18.186			250343	217260	227845	251764	254346	2.95753e+07	4.66926e+07	3.5192e+07	4.06642e+07	3.50045e+07	140.575	7.14	9.53982e-09
	C17 H30 N5 O5 P S	447.171	7.301			172411	147298	145196	118261	119021	2.75033e+07	2.03737e+07	1.50881e+07	3.30707e+07	1.28642e+07	140.318	7.13	8.81975e-07
Gibberellin A24	C20 H26 O5	346.178	10.456			206530	186376	214558	183742	151959	3.54526e+07	2.5778e+07	2.19583e+07	3.15327e+07	1.44069e+07	138.311	7.11	6.86041e-07
Gibberellin A24	C20 H26 O5	346.178	16.087			1.57242e+06	1.15334e+06	516393	1.89893e+06	649433	2.74797e+08	1.58762e+08	1.05367e+08	3.21885e+08	1.19501e+08	137.654	7.1	3.66366e-07
Humulone	C21 H30 O5	362.209	14.707			188879	159342	160395	151435	150872	2.44747e+07	2.17748e+07	1.21878e+07	2.46965e+07	8.43708e+06	136.654	7.09	1.69806e-05
Safracin A	C28 H36 N4 O6	524.262	8.596			119088	100317	98406.2	99657	83558.6	1.34961e+07	1.34247e+07	9.63321e+06	1.40507e+07	7.45941e+06	134.709	7.07	9.76001e-08
Benoxathian	C19 H23 N O4 S	361.135	15.017			331355	296365	326399	306212	305938	4.14049e+07	3.98942e+07	2.02209e+07	6.34061e+07	2.8095e+07	130.283	7.03	1.35895e-05
1-Phenylheptane-1,5-dione	C13 H16 O2	204.115	19.506			738698	391589	506299	392980	556077	6.42634e+07	9.56727e+07	6.55579e+07	9.34612e+07	5.88333e+07	129.485	7.02	1.43912e-09
	C16 H30 N5 O3 P S	403.181	22.226			229014	175190	195453	278172	276762	5.33195e+07	2.95628e+07	2.5924e+07	6.58767e+07	2.52871e+07	129.087	7.01	7.92307e-07
	C23 H33 N S2	387.204	21.498			538921	358477	520159	553088	417845	7.16974e+07	6.65873e+07	4.13244e+07	1.25449e+08	4.27578e+07	128.013	7	1.72503e-06
	C21 H23 N5 O4	409.173	9.622			157731	136043	145722	146740	143224	1.82868e+07	1.8358e+07	1.45279e+07	1.93043e+07	1.15963e+07	125.491	6.97	3.05071e-07
	C33 H43 N O4 P2 S	611.24	5.861			253678	216872	180096	172269	132675	2.51468e+07	2.2496e+07	1.41077e+07	3.18231e+07	1.36519e+07	124.911	6.96	6.83289e-08
	C27 H34 N4 O6	510.246	8.281			106942	83647.8	90828.3	85838.2	77188.2	1.06906e+07	1.4379e+07	9.09439e+06	1.28247e+07	8.30595e+06	124.543	6.96	1.05817e-08
2-Amino-9-{[(2-hydroxy-1,3,2-dioxaphosphinan-5-yl)oxy]methyl}-1,9-dihydro-6H-purin-6-one	C9 H12 N5 O5 P	301.059	5.953			246586	164698	142791	149067	118917	2.58456e+07	1.85225e+07	1.20224e+07	2.17779e+07	1.26622e+07	124.256	6.96	1.53683e-08
	C12 H15 O5 P	270.066	9.622			325915	311113	330993	326613	322927	3.50507e+07	4.01319e+07	4.29082e+07	3.46872e+07	5.18921e+07	123.136	6.94	2.10824e-07
	C36 H38 N3 O3 P S	623.239	8.99			204781	192124	182081	176126	167733	2.2376e+07	2.96379e+07	1.0608e+07	4.09894e+07	1.39505e+07	122.89	6.94	3.28734e-05
	C22 H28 N2 O5 P2 S	494.121	7.532			164426	114588	100915	101234	88437.1	7.06477e+06	1.60379e+07	8.1428e+06	1.23294e+07	1.2903e+07	121.791	6.93	3.65504e-08
	C19 H24 N5 O2 P3 S	479.089	5.992			253495	174343	155256	145750	110140	9.24056e+06	2.2741e+07	1.43904e+07	2.17216e+07	1.88974e+07	121.717	6.93	3.67298e-08
	C16 H30 N5 O3 P S	403.181	22.811			384889	288823	225953	492446	259041	5.73433e+07	3.44608e+07	2.6356e+07	6.88603e+07	2.60254e+07	119.315	6.9	1.67319e-07
PEG Monolaurate n5	C22 H44 O7	442.283	6.615	76.2		171199	128619	130689	121370	118249	2.01174e+07	1.53018e+07	1.24882e+07	2.09506e+07	1.04415e+07	118.97	6.89	9.4413e-08
	C15 H14 N4 O8 S	410.052	4.222			526053	419819	383935	323847	200339	4.73083e+07	3.57297e+07	3.92202e+07	5.61021e+07	4.41913e+07	115.101	6.85	2.89335e-07
Carnosol	C20 H26 O4	330.183	7.767			217324	132970	137071	131397	123433	1.52828e+07	1.74291e+07	1.00482e+07	2.11029e+07	1.36852e+07	114.934	6.84	3.83319e-09
	C31 H41 N7 O5 S	623.287	8.012			132769	85186.8	91519.4	94269.9	79128.9	8.45448e+06	1.04763e+07	2.79861e+07	2.5498e+06	1.73213e+07	114.471	6.84	0.000206393
NP-014175	C20 H28 O3	338.186	24.569	60.8		266435	250631	239414	257326	242320	3.59498e+07	2.64756e+07	3.89327e+07	1.97721e+07	2.8138e+07	112.269	6.81	1.49595e-06
	C23 H36 N6 O8	524.262	10.619			141427	136376	151252	166682	172280	1.68113e+07	1.16188e+07	1.68013e+07	1.86949e+07	1.07052e+07	111.081	6.8	1.23696e-07
2-Methoxyestradiol-17beta	C19 H26 O3	302.188	23.178			171991	166295	195600	151819	153990	2.11545e+07	1.84374e+07	1.43843e+07	2.34929e+07	1.474e+07	110.872	6.79	2.06552e-08
	C24 H27 N5 O2 S	449.187	8.944			223381	200858	214412	209019	208497	2.30568e+07	2.86424e+07	1.15355e+07	3.44363e+07	1.74509e+07	110.309	6.79	1.57345e-05
simenepag	C23 H29 N O5 S	431.176	15.024			332650	298216	316619	309564	310008	3.48157e+07	3.32158e+07	1.81218e+07	5.37055e+07	2.31838e+07	107.145	6.74	1.40722e-05
Brosimacutin H	C20 H24 O6	360.157	10.232			928171	670714	539377	1.12147e+06	408381	8.99302e+07	7.13289e+07	4.15122e+07	1.29369e+08	3.99874e+07	106.348	6.73	4.04804e-07
	C32 H42 N6 O4 S	606.298	14.377			151069	138227	167457	138749	120894	2.44619e+07	1.42702e+07	2.01451e+07	1.45171e+07	1.06345e+07	104.629	6.71	5.95382e-07
Carnosic acid	C20 H30 O5	332.199	7.768	92.4		128806	83194.6	92318.1	92903.1	80009.1	9.63576e+06	1.28051e+07	6.86745e+06	1.28989e+07	9.04003e+06	104.376	6.71	4.59141e-09
1-Phenylheptane-1,5-dione	C13 H16 O2	204.115	24.563			305942	296450	260119	285534	496818	3.55164e+07	2.44486e+07	3.56348e+07	3.07816e+07	2.58315e+07	103.834	6.7	4.84628e-09
	C22 H37 N2 O5 P3 S	534.164	15.09			458871	379180	375620	324719	325774	4.01209e+07	3.65506e+07	3.18508e+07	4.29551e+07	3.86153e+07	102.804	6.68	2.65758e-11
	C22 H38 N O2 P3 S	473.184	7.77			152793	102223	104973	103095	86726	1.05666e+07	1.11576e+07	8.61196e+06	1.37065e+07	9.75419e+06	102.494	6.68	4.72038e-10
8-Iso-15-keto-prostaglandin-F2β	C20 H32 O5	334.214	13.437	97.3		198596	167737	211848	208570	191434	2.74182e+07	2.65277e+07	1.81681e+07	2.00152e+07	1.35841e+07	100.784	6.66	6.11575e-07
	C30 H41 N O5 P2	557.247	19.517			192502	149628	163617	263950	263841	1.42947e+07	2.73474e+07	1.83998e+07	2.65581e+07	1.93187e+07	100.356	6.65	3.52782e-09
NP-020642	C4 H13 N4 O2 P	180.078	7.475			224788	158735	158140	429734	682999	3.4346e+07	2.17174e+07	2.22787e+07	2.54055e+07	1.64621e+07	99.11	6.63	1.98328e-05
Crocetin	C20 H24 O4	328.167	7.372			176014	137813	152263	130429	119601	2.16089e+07	1.36555e+07	8.74042e+06	2.66809e+07	8.95376e+06	99.087	6.63	1.11918e-05
2-Methoxyestradiol-17beta	C19 H26 O3	302.188	21.318			445530	387473	472617	473691	538879	6.01934e+07	4.64904e+07	4.64782e+07	5.52262e+07	3.86134e+07	98.368	6.62	2.57743e-10
	C17 H36 N5 O3 P3	451.203	7.061			104623	84684.9	88799.8	98749.1	95062.8	1.01543e+07	1.1503e+07	5.80225e+06	4.37092e+06	9.29781e+06	97.807	6.61	9.7422e-06
	C28 H20 N4 O8	540.127	6.525			229910	188642	183186	168522	114464	1.78935e+07	2.07242e+07	1.7386e+07	1.7351e+07	2.03601e+07	97.68	6.61	2.65119e-07
clavulone I	C25 H34 O7	446.23	14.915			295121	264775	270795	268730	267077	2.58921e+07	4.0749e+07	2.14997e+07	3.29134e+07	1.93209e+07	96.35	6.59	3.26646e-06
	C15 H29 N7 O5 S	419.194	7.799			183884	119831	122149	115399	94238.1	1.16864e+07	1.14814e+07	5.24583e+06	1.56786e+07	4.79267e+06	95.813	6.58	5.922e-06
Indocarbazostatin D	C27 H20 N4 O7	512.132	7.013			146259	113097	104870	103574	80089.7	6.7097e+06	1.14508e+07	6.56045e+06	1.27541e+07	1.00257e+07	95.602	6.58	1.98211e-08
	C24 H32 N6 O7	516.233	19.481			249716	241954	251992	285919	261948	2.40849e+07	4.11245e+07	2.3367e+07	3.79329e+07	1.75257e+07	95.578	6.58	4.90846e-06
3,5,7,9,11-dodecapentaenoic acid	C12 H14 O2	190.099	24.567			943720	267591	647837	232428	198085	3.24715e+07	2.24268e+07	3.38177e+07	2.47963e+07	2.21573e+07	92.665	6.53	6.76651e-05
Vanillyl mandelic acid	C9 H10 O5	198.052	7.099			200445	165910	144591	166244	139109	6.16342e+06	1.60288e+07	1.53447e+07	1.32169e+07	1.84371e+07	92.488	6.53	5.16413e-06
2,4-Dimethyl-1,5-diphenyl-3-pentanone	C19 H22 O	266.167	11.145			705507	428409	475187	425495	390039	3.90883e+07	3.34308e+07	5.88213e+07	3.08067e+07	5.63294e+07	91.241	6.51	9.35382e-09
Dimethocaine	C16 H26 N2 O2	278.199	4.553			3.15077e+06	1.11883e+06	377703	1.00959e+06	1.85214e+06	1.03257e+08	1.01549e+08	9.74176e+07	1.06084e+08	8.76528e+07	90.764	6.5	0.000215906
	C28 H20 N4 O8	540.127	6.26			337334	296109	347204	257288	216194	2.21114e+07	2.99206e+07	1.82046e+07	2.99364e+07	2.64543e+07	89.34	6.48	6.39927e-10
	C22 H29 N7 O4 P2	517.174	15.043			299575	258957	254708	262138	246170	2.59886e+07	2.31265e+07	1.46034e+07	3.29846e+07	1.71967e+07	89.306	6.48	2.93675e-06
	C23 H33 N O5 S	435.208	13.213			271073	244455	245639	240746	232258	2.16562e+07	2.1802e+07	1.05175e+07	2.69248e+07	2.26235e+07	89.186	6.48	7.66083e-06
	C14 H29 N4 O6 P	380.183	8.127			120969	107662	103533	105665	100325	9.20039e+06	9.0019e+06	6.82523e+06	1.06585e+07	6.25264e+06	85.193	6.41	2.42533e-07
Gibberellin A24	C20 H26 O5	346.178	7.621			151539	100390	108481	382286	77833.7	1.21741e+07	9.20581e+06	6.27103e+06	1.50317e+07	5.23742e+06	84.861	6.41	4.25656e-06
	C32 H40 N6 O8 S	668.262	8.35			119543	92168.1	100578	90567.9	81779.6	7.80283e+06	1.06234e+07	7.65941e+06	1.22841e+07	6.31229e+06	84.659	6.4	4.33188e-08
Sarcoehrendin D	C27 H40 O9	508.267	18.389			293650	258054	268202	279531	283337	2.34876e+07	2.45816e+07	1.4189e+07	3.14168e+07	1.54186e+07	84.025	6.39	5.9702e-06
	C13 H17 O5 P	284.081	9.618			319250	300783	315646	307023	299029	2.54987e+07	2.86935e+07	2.52435e+07	2.18099e+07	3.51127e+07	83.052	6.38	3.38696e-07
	C30 H22 N4 O10	598.132	6.359			429948	285271	391511	213250	158267	2.17544e+07	2.8153e+07	1.68534e+07	3.28712e+07	2.3286e+07	81.628	6.35	3.1513e-07
8-iso-15-keto Prostaglandin E2	C33 H45 N O4 P2 S	613.256	7.469			148543	107928	110712	118534	103482	7.56958e+06	1.46841e+07	8.33829e+06	1.21784e+07	9.00151e+06	81.306	6.35	6.53143e-08
Bracteatin	C15 H10 O7	302.042	6.923			418998	665783	362093	784202	968643	5.68734e+07	5.41213e+07	3.92285e+07	3.07028e+07	6.41423e+07	81.29	6.35	1.77751e-07
Formyldienolone	C21 H28 O4	344.199	22.524			390480	302299	274618	350802	329100	3.85971e+07	2.69671e+07	2.00131e+07	2.65975e+07	1.82522e+07	80.819	6.34	2.04602e-07
	C28 H19 N5 O6	521.132	6.666			276525	221688	285280	261220	247683	1.68161e+07	2.18005e+07	1.65199e+07	2.08879e+07	2.39098e+07	79.963	6.32	8.29686e-10
	C23 H28 N10 O4	508.231	8.575			128678	107469	101873	104934	84603	8.48527e+06	1.00811e+07	5.73875e+06	8.37221e+06	5.87937e+06	79.785	6.32	1.49403e-08
	C26 H42 N4 O14 P2	696.217	8.939			191840	153917	161207	146054	156335	1.48573e+07	5.29549e+06	1.22749e+07	1.01882e+07	1.5101e+07	78.517	6.29	1.17908e-05
	C26 H41 N7 O8 P2	641.25	9.013			168004	131972	140584	127613	122102	1.03013e+07	1.3672e+07	5.87721e+06	1.86617e+07	7.3395e+06	78.057	6.29	1.24112e-05
Spliceostatin H	C27 H43 N O9	525.294	17.724			447571	427165	463612	499608	522253	3.5891e+07	3.7818e+07	2.49218e+07	4.60108e+07	2.32787e+07	77.416	6.27	1.40732e-06
Sulprostone	C23 H31 N O7 S	465.182	7.62			122664	82625.4	85907.9	86693	79208	1.20205e+07	6.55953e+06	4.64313e+06	1.21779e+07	4.50031e+06	76.355	6.25	7.63921e-06
	C34 H28 N10 O3 P2 S	718.154	6.704			323497	319515	342037	302833	291004	1.81104e+07	2.72825e+07	1.40912e+07	3.41756e+07	2.40069e+07	75.135	6.23	6.31192e-06
	C23 H33 N O5 S	435.208	18.387			292666	255633	264123	273702	275886	3.23009e+07	2.05037e+07	1.34156e+07	4.89987e+07	1.26239e+07	74.913	6.23	6.42913e-05
Varicuothiol B	C11 H16 O5 S	260.072	6.244			387687	337716	371591	288520	244538	2.52704e+07	2.38162e+07	2.13312e+07	2.58168e+07	2.62459e+07	74.827	6.23	2.31909e-08
	C19 H35 N9 O2 P2	483.237	6.753			356622	202989	250389	195711	201231	2.92891e+07	1.50845e+07	6.16554e+06	2.35388e+07	1.19551e+07	74.312	6.22	2.01822e-05
	C22 H29 N O4 S	403.181	8.137			627333	309733	133741	686939	263900	3.96367e+07	2.2969e+07	1.28725e+07	4.79424e+07	1.40801e+07	74.157	6.21	6.22224e-06
2,4-Dimethyl-1,5-diphenyl-3-pentanone	C19 H22 O	266.167	21.311			457008	397804	485654	487205	554773	4.62941e+07	3.58849e+07	3.51553e+07	4.18483e+07	2.90896e+07	73.89	6.21	6.07935e-10
7-desmethyl-6-methylbostrycoidin	C15 H11 N O5	285.064	6.501			201558	161228	147481	153266	117496	2.11637e+07	1.13023e+07	8.05319e+06	1.81094e+07	7.16963e+06	73.743	6.2	4.87824e-06
	C25 H29 N5 O2	431.231	19.653			460728	338398	391399	615140	568588	2.80449e+07	3.35435e+07	5.035e+07	2.97254e+07	7.71674e+07	72.806	6.19	4.48056e-07
Azilsartan medoxomil	C30 H24 N4 O8	568.158	8.492			120230	92019.5	93095.4	98788.4	91147.8	7.53641e+06	7.65538e+06	5.88212e+06	6.75207e+06	6.18723e+06	72.528	6.18	9.25323e-12
	C12 H20 O7 S	308.093	5.677			1.97599e+06	1.14371e+06	925449	1.33738e+06	1.05903e+06	7.62898e+07	8.99137e+07	7.22411e+07	9.64995e+07	8.29055e+07	72.488	6.18	4.34759e-07
	C23 H28 N10 O4	508.231	15.791			182930	149758	165482	161336	167249	1.01531e+07	1.16795e+07	1.20611e+07	1.48185e+07	9.10463e+06	70.579	6.14	4.62524e-08
	C23 H35 N O5 S	437.223	9.128			234631	190330	211761	190221	173983	1.40065e+07	1.34051e+07	1.17326e+07	1.81486e+07	1.11473e+07	70.431	6.14	2.90608e-09
	C29 H41 N10 O3 P	608.313	15.034			188055	168981	172958	180048	183856	1.61733e+07	1.26529e+07	1.94736e+07	6.13906e+06	1.04439e+07	70.275	6.13	2.59564e-05
2-Methoxyestrone	C19 H24 O3	300.172	21.313	79.3	C05299	315160	263815	336935	301852	324182	2.17985e+07	1.77683e+07	2.36669e+07	2.25374e+07	1.79606e+07	69.166	6.11	7.42951e-11
	C23 H29 N O6 S	447.171	8.139			1.57405e+06	952359	666644	1.8665e+06	829617	1.19765e+08	6.58039e+07	3.78628e+07	1.41722e+08	3.95186e+07	69.096	6.11	3.93497e-06
	C2 H7 N4 O P	134.035	7.098			190992	159205	139763	161912	136545	4.11691e+06	1.17898e+07	1.09503e+07	1.01089e+07	1.40739e+07	68.781	6.1	1.68586e-05
	C23 H35 N7 O4 P2	535.224	11.29			239213	234903	237515	226145	214529	1.56353e+07	1.95567e+07	1.60702e+07	1.58678e+07	1.70229e+07	68.412	6.1	1.70909e-10
NP-008998	C16 H18 O6	328.094	7.991	64.8		184006	259742	171398	145902	192125	5.23905e+06	1.63889e+07	1.23957e+07	6.41376e+06	1.25256e+07	67.366	6.07	7.09774e-06
	C10 H15 O5 P	246.065	5.049			269296	206538	196328	160051	399259	1.47257e+07	8.61164e+06	1.63528e+07	8.29229e+06	1.3844e+07	67.029	6.07	8.38804e-08
	C24 H16 N10 O5	524.131	7.055			153070	119090	119613	126888	116001	5.84695e+06	8.0031e+06	4.69568e+06	8.63669e+06	8.57999e+06	66.908	6.06	3.43373e-07
Coibacin A	C19 H24 O2	284.177	12.208			204436	207696	194033	209339	187206	1.82105e+07	1.36365e+07	1.00841e+07	2.04297e+07	8.9541e+06	66.703	6.06	9.46583e-06
	C19 H29 N7 O3 P2	465.182	7.299			151227	111299	96852.5	119843	91322.3	9.75902e+06	7.39553e+06	5.06456e+06	1.20947e+07	5.12011e+06	66.448	6.05	6.78257e-07
Coibacin A	C19 H24 O2	284.178	7.372			138384	99134.9	109600	101826	80755.6	1.03502e+07	6.7529e+06	4.50947e+06	1.10031e+07	4.13197e+06	66.318	6.05	3.74192e-06
	C37 H37 N5 O4 S2	679.227	8.938			152201	135083	142641	130337	140747	9.2098e+06	1.17433e+07	5.05107e+06	1.22357e+07	8.03352e+06	65.435	6.03	8.70456e-06
	C29 H43 N O11 S2	645.228	7.452			195707	147064	179318	132497	142461	9.55894e+06	1.07958e+07	4.68083e+06	1.314e+07	7.42954e+06	64.999	6.02	2.63592e-06
	C23 H35 N O5 S2	469.196	8.703			172884	160566	166070	167324	154773	1.41671e+07	1.07237e+07	5.86008e+06	2.04875e+07	8.60689e+06	64.573	6.01	3.5243e-05
	C30 H43 N O9 P2	623.24	10.841			275350	178992	185200	169342	162049	1.14195e+07	1.41953e+07	5.44933e+06	1.89282e+07	1.01046e+07	63.799	6	3.77087e-06
	C17 H11 N6 O6 P	426.047	4.322			333797	222562	203476	160877	119892	1.27538e+07	1.06523e+07	1.09317e+07	1.43238e+07	1.30951e+07	62.68	5.97	3.78716e-06
	C23 H48 N2 O2	384.371	13.798			1.12318e+06	235535	3.71512e+06	243719	236485	1.87571e+07	1.41342e+07	8.12179e+06	1.05767e+08	1.5266e+07	62.638	5.97	0.00116263
	C33 H36 N7 O5 P	641.25	6.888			205455	151331	175948	149507	155128	9.67221e+06	1.63519e+07	1.98413e+06	2.66611e+07	8.45495e+06	62.35	5.96	0.000670947
Hesperetin	C16 H14 O6	302.079	6.719	93.3	C01709	525926	511077	443026	488817	544004	2.73441e+07	3.63746e+07	3.17243e+07	3.51892e+07	1.67182e+07	62.073	5.96	3.37638e-06
	C30 H51 N4 O6 P3	656.305	9.746			140910	129748	143558	142487	136650	8.65718e+06	1.2574e+07	7.50375e+06	1.10774e+07	8.62525e+06	61.438	5.94	6.76881e-07
	C17 H32 N5 O5 P S	449.187	7.021			235741	179568	179937	214008	161227	1.09993e+07	1.12472e+07	5.64583e+06	1.34703e+07	6.81478e+06	61.129	5.93	2.15703e-06
4E,6E,12Z-Tetradecatriene-8,10-diynoic acid	C14 H14 O2	214.099	21.317			453483	392757	477046	476080	539241	3.48319e+07	2.87315e+07	2.72339e+07	3.27039e+07	2.22002e+07	60.35	5.92	1.08991e-09
Lophachinin D	C20 H26 O4	330.183	19.587			667732	664563	538807	2.3105e+06	674879	4.51213e+07	3.94054e+07	2.84856e+07	5.74638e+07	2.79397e+07	59.014	5.88	1.20932e-05
	C15 H28 N5 O2 P	341.199	8.942			112948	96959.3	101689	97955.1	108625	5.93847e+06	7.87662e+06	2.62134e+06	1.03544e+07	4.10869e+06	58.398	5.87	6.67865e-05
	C27 H34 N6 O3 S	522.24	7.558			113843	93698.3	91815.3	93576.3	88636.2	4.59698e+06	5.76456e+06	5.42269e+06	6.964e+06	4.91177e+06	57.949	5.86	1.09989e-09
2-Methoxyestradiol-17beta	C19 H26 O3	302.188	16.097			245498	256126	353820	234059	213724	2.43087e+07	1.41391e+07	9.23481e+06	2.95624e+07	1.0897e+07	57.594	5.85	1.0029e-05
	C17 H34 N5 O4 P S	435.208	22.384			1.92771e+06	1.10192e+06	778900	3.24873e+06	886701	9.45851e+07	6.31975e+07	4.31972e+07	1.62676e+08	3.84155e+07	57.352	5.84	6.07956e-06
11-keto Testosterone (CRM)	C19 H26 O3	348.193	23.915	68.7		172962	156915	172737	185093	186543	9.91495e+06	9.65127e+06	9.91754e+06	1.37865e+07	7.36646e+06	57.324	5.84	3.7109e-07
	C20 H32 N4 O9 P2	534.165	18.733			306741	237759	319498	361462	358265	2.06986e+07	1.82893e+07	1.03702e+07	3.54119e+07	1.39642e+07	57.244	5.84	7.51428e-06
	C23 H33 N O5 S	435.208	8.861			218301	184541	199484	196891	194925	1.15214e+07	1.1215e+07	7.03738e+06	1.38887e+07	7.27858e+06	56.96	5.83	4.44798e-06
	C13 H29 N4 O P	288.207	7.769			137742	93060	96375.4	95756	81382	5.38751e+06	6.51214e+06	3.17527e+06	6.93886e+06	4.79238e+06	56.263	5.81	8.4739e-08
Paenibacillin A	C11 H18 N2 O	194.142	7.976			1.06868e+06	337319	2.06846e+06	207886	160684	1.89469e+07	2.47591e+07	5.42366e+06	5.78417e+07	1.04887e+07	56.169	5.81	0.000537611
	C21 H23 N5 O3	393.178	21.326			595080	466875	612473	499893	431808	3.42195e+07	2.78243e+07	2.74087e+07	3.28002e+07	2.42115e+07	55.661	5.8	9.63455e-11
	C29 H22 N6 O9	598.144	5.816			255141	185187	160219	171655	134199	7.20357e+06	9.90593e+06	5.79767e+06	1.12281e+07	9.54042e+06	55.579	5.8	1.12397e-08
	C25 H34 N6 O9	562.239	19.5			234201	186059	208019	343245	351045	1.2096e+07	1.82026e+07	1.29166e+07	1.77197e+07	1.12743e+07	55.152	5.79	2.00442e-08
	C25 H44 N5 O4 P3	571.263	17.732			265128	196400	224058	301192	296951	1.45856e+07	1.4944e+07	1.11575e+07	1.98788e+07	7.89408e+06	55.013	5.78	4.42339e-07
15-deoxy-delta-12,14-PGJ2	C20 H28 O3	316.204	8.592			396771	154211	159011	165025	155004	9.19312e+06	8.64922e+06	5.67401e+06	9.45818e+06	4.42388e+06	54.394	5.77	4.98382e-07
	C42 H74 N O16 P3	941.423	14.922			152189	130815	129254	133498	125867	7.06896e+06	1.07787e+07	5.0821e+06	1.05947e+07	5.62932e+06	54.038	5.76	6.88968e-06
NP-008998	C16 H18 O6	328.094	18.765	64.1		392352	470489	512538	491186	511082	2.48858e+07	4.63627e+07	2.65392e+07	2.38121e+07	2.77787e+07	54.031	5.76	3.09901e-07
	C23 H29 N O4 S	415.181	24.263			783428	526455	1.05984e+06	671552	641942	3.74405e+07	3.54037e+07	1.69826e+07	6.47775e+07	2.49163e+07	52.719	5.72	4.92865e-06
	C20 H14 N4 O4	374.1	7.709			133363	90875.1	100457	105010	89403.5	3.15048e+06	6.06515e+06	5.06935e+06	5.2919e+06	7.05239e+06	52.679	5.72	2.04413e-07
	C27 H31 N7 O2	485.252	6.548			183970	142204	177706	147924	141609	8.17757e+06	7.70269e+06	6.37155e+06	1.11296e+07	7.24021e+06	52.072	5.7	7.59238e-09
N-(2-methyl-3-oxodecanoyl)pyrrolidine	C15 H27 N O2	253.204	7.66			183859	145861	148924	134778	134394	7.73035e+06	7.50739e+06	6.96076e+06	8.79349e+06	6.60313e+06	51.469	5.69	3.22425e-11
	C21 H48 N4 O14 P2 S	674.235	8.92			194572	152151	159607	150626	162193	8.21099e+06	1.03367e+07	5.31317e+06	1.20002e+07	7.96322e+06	51.445	5.68	1.65447e-06
	C21 H23 N4 O4 P	426.144	7.124			322434	274258	489472	291590	251984	1.63326e+07	1.69888e+07	1.49798e+07	1.39552e+07	1.0931e+07	51.373	5.68	2.26357e-08
	C24 H27 N5 O2 S	449.187	5.862			238422	201726	186295	167408	144970	1.01387e+07	9.50125e+06	5.79811e+06	1.48374e+07	5.91598e+06	51.001	5.67	1.86636e-06
	C13 H27 N4 O4 P	334.178	23.175			197768	174756	204261	157542	163611	1.04603e+07	8.84081e+06	6.94606e+06	1.10123e+07	7.1913e+06	50.589	5.66	1.92822e-08
Reduced Glutathione	C10 H17 N3 O6 S	307.084	7.392			210614	96650.7	106662	140993	194187	7.15277e+06	6.00686e+06	1.15968e+07	5.29628e+06	7.09385e+06	50.313	5.65	7.63312e-08
	C33 H37 N5 O S2	583.245	7.524			144027	97061.4	93038.6	95637.7	83626.3	4.76026e+06	5.77825e+06	2.48427e+06	7.68748e+06	3.46902e+06	49.774	5.64	3.6126e-06
	C19 H39 N3 O2	341.304	9.691			1.65368e+06	317674	2.08904e+06	319736	194303	1.58498e+07	1.92893e+07	6.95974e+06	2.79429e+07	7.63282e+06	49.571	5.63	0.00109411
	C22 H14 N4 O8	462.08	6.387			505255	361489	510046	306705	235565	1.39147e+07	1.79048e+07	2.39694e+07	7.27681e+06	4.381e+07	49.531	5.63	2.65948e-05
	C25 H34 N2 O7 S	506.208	12.406			473473	475289	477576	493174	492977	2.38888e+07	2.36006e+07	2.05615e+07	3.81634e+07	1.78709e+07	49.418	5.63	6.27015e-06
13,14-Dihydro-15-keto Prostaglandin J2	C20 H30 O4	316.204	23.129	98.7		247882	213019	219924	201930	175473	1.55013e+07	9.14042e+06	1.05265e+07	1.11482e+07	6.78875e+06	49.416	5.63	6.57803e-07
	C21 H44 N2 O2	356.34	9.723			402092	369385	2.78855e+06	226733	197755	2.06002e+07	1.79608e+07	9.71415e+06	6.17434e+07	1.81618e+07	49.168	5.62	0.00029078
	C18 H33 N10 O3 P S	500.219	8.122			109750	98101.3	94763.5	97165.6	92699.9	5.61978e+06	4.76636e+06	3.8452e+06	6.87821e+06	3.08893e+06	49.054	5.62	5.28822e-06
	C13 H25 N4 O2 P	300.172	7.373			173428	134713	147637	125426	114054	1.05073e+07	6.60665e+06	4.95571e+06	1.18929e+07	3.85566e+06	49.043	5.62	1.44734e-05
Solanapyrone K	C21 H29 N O4	359.209	8.936			156627	131835	140408	125370	132230	6.46216e+06	8.7976e+06	3.34985e+06	1.0648e+07	5.04228e+06	48.871	5.61	3.06453e-05
18-β-Glycyrrhetinic acid	C30 H46 O4	470.339	23.192	86.7	C02283	311188	245893	291245	244834	242860	1.19982e+07	1.20139e+07	1.05339e+07	1.44331e+07	8.46771e+06	48.794	5.61	9.1578e-09
4-Prenyldihydropinosylvin	C19 H22 O2	282.162	13.225			318313	289941	294182	291049	283356	2.06643e+07	1.41263e+07	1.12153e+07	2.37072e+07	8.84921e+06	48.536	5.6	2.47099e-05
	C27 H16 N4 O6	492.105	7.842			179841	108605	106901	112764	93326.1	5.25234e+06	5.54804e+06	3.9581e+06	6.17512e+06	4.09346e+06	48.362	5.6	1.06252e-08
	C22 H44 N2 O2	368.34	10.58			416924	263029	886699	209674	192873	1.26801e+07	1.4638e+07	8.26646e+06	2.3537e+07	3.21917e+06	48.208	5.59	5.84282e-05
	C39 H30 N4 O14	778.175	6.852			190603	131804	134194	111858	83345.1	4.15907e+06	6.49535e+06	3.2591e+06	7.41776e+06	6.23472e+06	47.303	5.56	1.02989e-07
Carnosol	C20 H26 O4	330.183	9.995			249706	280382	273233	246395	242103	1.166e+07	1.26692e+07	8.84405e+06	1.23228e+07	8.10123e+06	46.695	5.55	3.47472e-07
3,5,7,9,11-dodecapentaenoic acid	C12 H14 O2	190.099	19.513			1.25538e+06	1.10406e+06	1.08143e+06	905188	1.12662e+06	4.92454e+07	7.63684e+07	5.15077e+07	7.16941e+07	4.64495e+07	46.653	5.54	4.20697e-08
	C30 H62 N8 O4 S2	662.436	23.296			3.42448e+06	492907	5.27819e+06	383270	117025	2.274e+07	3.34458e+07	1.10061e+07	6.98878e+07	2.2942e+07	46.544	5.54	0.00543236
N-[(2S)-1-Ethoxy-1-oxo-4-phenyl-2-butanyl]-L-alanyl-5-oxo-L-proline	C20 H26 N2 O6	390.178	24.467			252851	235043	238201	233050	247426	1.37555e+07	1.09577e+07	1.09258e+07	1.13354e+07	9.09053e+06	46.002	5.52	1.57293e-07
5-Methyl-1-phenyl-3-hexanyl sulfamate	C13 H21 N O3 S	271.124	6.478			192127	136066	150610	164542	119145	6.83951e+06	6.57701e+06	5.40295e+06	7.54713e+06	7.07761e+06	45.412	5.51	1.61374e-09
	C26 H32 N4 O3	448.246	15.385			299474	259863	310745	245384	240365	1.1029e+07	1.65494e+07	1.13081e+07	1.3142e+07	1.17975e+07	45.399	5.5	6.81188e-10
	C13 H27 N4 O3 P	318.183	8.005			171309	108276	111624	116681	99502.2	5.71803e+06	5.04566e+06	2.11654e+06	7.92012e+06	2.35997e+06	45.202	5.5	4.67989e-05
	C23 H39 N3 O2	389.304	11.981			667285	325172	1.40502e+06	280149	273005	1.46667e+07	1.03255e+07	1.56133e+07	2.55924e+07	3.16755e+06	45.105	5.5	0.000155936
NP-005870	C20 H26 O5	346.178	23.565	72.6		1.89413e+06	2.003e+06	1.76971e+06	2.50395e+06	1.64746e+06	8.82042e+07	8.53152e+07	6.96616e+07	1.00394e+08	5.91351e+07	45.042	5.49	3.18961e-09
1-Phenylheptane-1,5-dione	C13 H16 O2	204.115	17.739			450950	411606	455289	500136	532974	2.04557e+07	2.08204e+07	1.59631e+07	2.71638e+07	1.3569e+07	44.929	5.49	7.31359e-07
2-(Sulfooxy)ethyl methacrylate	C6 H10 O6 S	210.019	4.198			684319	546354	499864	421808	261047	5.67298e+07	2.22811e+07	4.13284e+06	6.71062e+07	1.33299e+07	44.574	5.48	0.000954432
	C23 H43 N3 O3	409.33	7.781			1.15307e+06	120988	701900	122014	99452.5	5.3744e+06	6.46099e+06	4.32982e+06	7.81232e+06	1.74043e+06	44.047	5.46	0.00257757
Norethindrone	C20 H26 O2	298.193	8.122			269959	255811	310768	214439	156946	1.54207e+07	1.12548e+07	9.29722e+06	2.01578e+07	7.56279e+06	43.996	5.46	3.24322e-07
	C28 H46 N O11 P S	635.251	7.392			177969	130276	150461	127380	597434	7.09357e+06	6.25714e+06	1.07474e+07	4.81819e+06	6.61932e+06	43.994	5.46	4.92712e-05
Aureusidin 6-glucuronide	C21 H18 O12	462.08	6.956			208999	159311	187930	140805	91859.4	6.68347e+06	6.99666e+06	1.30726e+07	4.67398e+06	2.74035e+07	43.918	5.46	3.18066e-05
	C20 H25 N O5 S	391.145	21.495			552434	497577	553027	566625	646321	2.85299e+07	2.42309e+07	1.4998e+07	4.38597e+07	1.57504e+07	43.815	5.45	2.70782e-05
3-Methyladipic acid	C7 H12 O4	160.072	2.508	76.4		3.13254e+06	4.96261e+06	2.90674e+06	6.66528e+06	7.2423e+06	8.87823e+07	1.19561e+08	2.44391e+08	2.16438e+08	2.8834e+08	43.614	5.45	2.22499e-06
1-(12-Aminododecyl)-2-pyrrolidinone	C16 H32 N2 O	268.251	8.075			370732	929445	1.50335e+06	285452	165559	1.60467e+07	1.59703e+07	7.31367e+06	2.54862e+07	1.04335e+07	43.078	5.43	0.00028819
	C24 H33 N O6 S	463.203	8.405			162501	152324	151521	149652	141691	7.47291e+06	6.41138e+06	5.49136e+06	1.15386e+07	4.67431e+06	42.313	5.4	1.20791e-05
Parmosidone D	C27 H22 O12	538.111	5.068			202223	157867	146484	115518	78495.2	6.14396e+06	6.61407e+06	4.53207e+06	6.91655e+06	4.39961e+06	41.943	5.39	4.03799e-07
	C28 H22 N4 O8	542.143	6.061			176387	134813	134457	113797	104069	5.63696e+06	6.20011e+06	2.81088e+06	8.36297e+06	5.44867e+06	41.924	5.39	1.80524e-06
5,7,9,11,13-tetradecapentaenoic acid	C14 H18 O2	218.131	24.486			500302	452689	465955	457847	519529	2.08402e+07	1.45571e+07	1.94674e+07	1.99725e+07	1.59881e+07	41.78	5.38	4.59311e-08
	C13 H23 N4 O P	282.162	21.333			509438	470244	515451	531150	601634	2.47974e+07	2.14225e+07	1.90862e+07	2.71387e+07	1.52152e+07	41.561	5.38	2.60662e-07
Aldosterone	C21 H28 O5	360.193	19.884	72.4	C01780	629505	413405	644075	649915	612498	4.18802e+07	1.88185e+07	2.52325e+07	4.10638e+07	1.45212e+07	40.083	5.32	8.44894e-06
10E,12E-tetradecadiene-4,6-diynoic acid	C14 H16 O2	216.115	19.519			308548	303376	320593	369055	342986	1.2661e+07	1.80722e+07	1.23779e+07	1.87674e+07	1.1192e+07	39.493	5.3	5.15912e-07
Luteolin	C15 H10 O6	286.048	7.489	89.4	C01514	851736	753069	238656	968203	623769	4.43862e+07	2.95797e+07	2.54365e+07	1.9762e+07	3.45919e+07	39.279	5.3	7.64455e-06
Prosafrinine	C17 H33 N O2	283.251	22.989			353912	333420	590010	356460	1.24979e+06	1.5158e+07	1.39965e+07	1.00742e+07	2.24003e+07	8.20289e+06	39.265	5.3	1.22605e-05
	C21 H42 N5 O3 P S2	507.247	7.755			149330	132740	129364	122439	113514	5.03161e+06	6.9769e+06	2.64057e+06	7.55695e+06	4.31865e+06	38.895	5.28	2.00404e-05
	C22 H35 N4 O9 P	530.212	9.725			194786	187705	185343	185887	167948	7.48032e+06	7.07892e+06	5.3496e+06	9.09361e+06	4.59902e+06	38.082	5.25	4.21602e-06
Gibberellin A36	C20 H26 O6	362.173	7.674			300659	268313	227064	180069	145725	1.39427e+07	8.64484e+06	6.16584e+06	1.12578e+07	3.83982e+06	38.072	5.25	5.54499e-06
NP-015559	C17 H14 O7	330.074	9.527	91.8		1.90738e+07	3.68519e+06	2.64279e+06	2.73338e+06	150916	1.03954e+08	1.43509e+08	8.74148e+07	8.55237e+07	1.08209e+08	38.031	5.25	0.00801747
	C23 H44 N2 O2	380.34	8.281			332921	466019	2.25437e+06	205288	175586	8.94642e+06	1.59106e+07	1.04016e+07	2.9221e+07	1.26312e+07	37.94	5.25	0.000570475
	C14 H28 N4 O7 P2	426.144	7.447			253120	168719	171006	178397	152661	6.87518e+06	4.57013e+06	6.44924e+06	5.3772e+06	7.52279e+06	37.714	5.24	2.78194e-09
	C10 H12 N6 O5 S	328.059	5.63			317206	282593	302489	245540	188924	1.06473e+07	9.43113e+06	1.04284e+07	1.07057e+07	1.15745e+07	37.677	5.24	2.74974e-07
Caffeic acid	C9 H8 O4	180.042	7.099	97.3	C01197	1.11136e+06	1.44057e+06	545807	921139	315323	1.4218e+07	3.77305e+07	3.46524e+07	3.01033e+07	4.48913e+07	37.619	5.23	8.35464e-06
	C25 H39 N7 O7 P2	611.24	7.534			235495	168021	157491	155213	138488	5.92436e+06	8.27442e+06	5.25852e+06	1.05426e+07	5.22687e+06	37.617	5.23	1.15908e-07
	C18 H30 N9 O2 P S	467.198	7.527			138138	96718.9	96437	103256	96317.9	4.06569e+06	3.78835e+06	2.41942e+06	3.63168e+06	2.08473e+06	37.549	5.23	4.95526e-07
	C28 H21 N5 O6	523.148	5.981			213870	148725	133908	127098	97098.4	4.9407e+06	6.02564e+06	3.4339e+06	5.89579e+06	4.0901e+06	36.896	5.21	3.84291e-08
	C17 H30 N5 O3 P S	415.181	25.236			420767	354913	363504	344320	373380	1.45775e+07	1.33918e+07	8.95407e+06	2.47233e+07	6.28758e+06	36.841	5.2	8.82136e-05
	C12 H11 N O4 S	265.041	8.954			213545	190488	191866	181983	193000	7.05235e+06	8.15415e+06	3.25437e+06	1.0426e+07	5.48252e+06	36.757	5.2	4.91978e-05
	C42 H55 N5 O4	693.424	21.356			194353	156880	192671	165452	169738	6.20258e+06	6.48794e+06	2.69714e+06	1.10262e+07	5.23908e+06	36.542	5.19	6.98869e-05
Actinoallonaphthyridine A	C14 H18 N2 O	230.142	5.633			877797	317254	509045	300522	284909	1.14513e+07	1.80554e+07	1.80716e+06	2.34144e+07	3.1448e+06	36.095	5.17	0.00235916
	C31 H40 N4 O7	580.289	6.442			281109	234591	269757	213854	202254	1.72627e+07	8.34033e+06	5.8064e+06	1.38751e+07	6.58689e+06	35.553	5.15	2.22157e-05
	C24 H40 N9 O4 P3	611.24	6.995			135570	113661	117216	96349.2	68371.5	4.29929e+06	3.9986e+06	1.90364e+06	5.17393e+06	2.16057e+06	35.18	5.14	2.91045e-06
Phevalin	C14 H16 N2 O	228.126	8.843			247176	203582	489148	205522	197588	7.17679e+06	9.93561e+06	2.11238e+06	2.2681e+07	4.4782e+06	34.92	5.13	0.000407899
	C24 H35 N O3 P2	447.208	22.134			353915	299063	325762	408927	414937	1.54791e+07	1.2131e+07	7.4444e+06	2.6167e+07	7.72087e+06	34.277	5.1	5.04504e-05
	C27 H18 N4 O3	446.139	24.466			339436	371736	347301	337189	340879	1.40554e+07	8.47445e+06	1.05799e+07	1.18973e+07	1.16834e+07	34.274	5.1	8.20725e-07
Luteolin	C15 H10 O6	286.048	8.008	90	C01514	1.59096e+07	1.53383e+07	7.33074e+06	1.84403e+07	8.9089e+06	5.21104e+08	6.2134e+08	4.32245e+08	5.10589e+08	7.02413e+08	33.974	5.09	2.37965e-06
	C21 H44 N8 O3 P2 S	550.271	7.983			177292	101541	109868	116574	99576.7	3.24649e+06	4.55005e+06	3.71954e+06	5.30717e+06	3.51948e+06	33.854	5.08	8.66826e-09
(3Z)-3-({1,6-dimethyl-2-[(1E,3E)-penta-1,3-dien-1-yl]-1,2,4a,5,6,7,8,8a-octahydronaphthalen-1-yl}(hydroxy)methylidene)-5-(1-hydroxyethyl)pyrrolidine-2,4-dione	C24 H33 N O4	399.241	7.694	62.3		192190	152521	159443	141227	140673	5.45305e+06	5.13226e+06	3.76707e+06	6.69155e+06	4.18047e+06	33.649	5.07	5.03756e-08
prifelone	C19 H24 O2 S	316.149	7.77			158606	138625	145208	141601	135465	4.67823e+06	5.54033e+06	2.98251e+06	6.63687e+06	4.01767e+06	33.038	5.05	8.03108e-06
	C23 H20 N4 O6	448.137	6.719			517219	493555	420100	455096	497266	1.47348e+07	1.83325e+07	1.69805e+07	1.62993e+07	8.86183e+06	33.024	5.05	3.58134e-06
	C35 H56 N8 O4 S	684.418	23.296			1.22299e+06	215402	1.77455e+06	155171	130021	7.08268e+06	9.2303e+06	3.5782e+06	1.55816e+07	6.61981e+06	32.881	5.04	0.00339392
	C16 H21 N4 O4 P3 S	458.051	7.101			101697	83327.6	71877.1	81780	67709.6	1.20084e+06	3.52149e+06	2.53146e+06	2.66819e+06	3.66809e+06	32.626	5.03	1.70734e-05
	C19 H30 N2 O8	414.202	24.472			364678	396701	368073	354822	356100	1.40817e+07	9.96372e+06	1.1801e+07	1.22426e+07	1.15648e+07	32.36	5.02	2.3923e-08
Safracin B	C28 H36 N4 O7	540.258	6.153			213208	185535	159859	154694	118631	1.22594e+07	5.10721e+06	3.5959e+06	8.48946e+06	3.70911e+06	31.948	5	2.28499e-05
Fern-9(11)-en-3,19-dione	C30 H46 O2	438.349	26.394			612959	694813	718141	814918	812856	3.18767e+07	1.35794e+07	3.19216e+07	2.26847e+07	1.03551e+07	31.588	4.98	7.22101e-05
Crocetin	C20 H24 O4	328.167	14.321			495036	440904	564919	595636	488424	2.56559e+07	1.55672e+07	1.39913e+07	2.60119e+07	1.01298e+07	31.447	4.97	1.45513e-05
Monasnicotinate A	C21 H27 N O4	357.194	22.813			208541	198104	193318	171300	164854	1.04476e+07	6.0535e+06	4.64622e+06	1.22431e+07	4.44496e+06	31.314	4.97	3.74155e-05
	C37 H28 N4 O12	720.169	6.874			566759	461257	501600	374998	248673	9.52521e+06	1.48141e+07	8.72019e+06	1.7062e+07	1.42817e+07	30.963	4.95	1.32291e-07
	C23 H33 N O4 P2 S	481.159	8.202			133098	116899	124917	117811	111837	3.76563e+06	3.63846e+06	1.56989e+06	6.30911e+06	2.18463e+06	30.884	4.95	0.000146348
	C5 H20 Cl N10 O3 P3	396.061	7.106			320778	255879	214995	238390	192464	3.52972e+06	7.35039e+06	7.33598e+06	6.37663e+06	9.15648e+06	30.773	4.94	1.58064e-06
1-Dodecyl-5-oxo-3-pyrrolidinecarboxylic acid	C17 H31 N O3	297.23	23.399			397330	191938	1.02613e+06	154291	245825	6.60972e+06	7.55566e+06	5.60709e+06	2.18302e+07	7.8565e+06	30.736	4.94	7.45164e-05
	C31 H39 N7 O4 P2	635.251	7.518			134342	90600.7	86908.5	198976	550992	2.25768e+06	4.11563e+06	5.14653e+06	1.47044e+06	8.97701e+06	30.635	4.94	0.000157861
Pestalafuranone H	C11 H12 O4	208.073	8.658			1.19226e+06	353008	388544	278843	132703	3.98109e+06	1.16474e+07	1.46496e+06	1.78303e+07	1.06627e+07	30.205	4.92	0.00111674
	C35 H31 N2 O8 P S	670.154	6.639			207332	135265	190498	153518	103362	3.77291e+06	5.46144e+06	4.63199e+06	4.46746e+06	6.30506e+06	30.172	4.92	5.80635e-08
Dracocephalumoid A	C20 H24 O5	344.162	22.843			694756	4.6703e+06	896998	6.49609e+06	953525	4.73464e+07	2.87568e+07	2.12204e+07	4.27782e+07	2.31605e+07	30.158	4.91	0.00225878
	C12 H20 N2 O5 S	304.109	6.341			1.1815e+06	453868	464555	576643	292110	5.47501e+06	1.5648e+07	1.61425e+07	1.39701e+07	3.10805e+06	30.072	4.91	0.000196836
IN00458	C9 H6 O3	162.032	7.098			6.42571e+06	6.56554e+06	6.38971e+06	2.93542e+07	2.855e+07	7.51438e+07	2.1459e+08	1.97358e+08	1.65677e+08	2.47213e+08	30.06	4.91	0.000609695
	C30 H43 N3 O9 S	621.272	8.744			158869	139740	151752	154716	144873	2.76023e+06	4.44458e+06	1.2993e+07	842550	5.78199e+06	29.288	4.87	0.00199818
	C34 H63 N8 O2 P S	678.454	15.298			723204	211078	227001	163368	147076	6.17147e+06	8.77314e+06	3.49348e+06	9.82939e+06	5.37595e+06	29.238	4.87	3.19813e-05
	C16 H33 N7 O3 S2	435.208	6.539			307870	219186	361620	219530	203639	6.37578e+06	6.37991e+06	2.45091e+06	1.02489e+07	1.69966e+06	29.043	4.86	0.000515728
NP-016928	C20 H28 O3	338.185	24.103	68.2		1.16707e+06	1.42963e+06	1.71611e+06	2.11945e+06	2.69202e+06	4.98788e+07	3.5719e+07	5.40512e+07	3.21414e+07	4.87169e+07	28.388	4.83	3.22132e-07
	C36 H41 N7 O9	715.296	7.091			166621	135966	116801	132348	109127	2.33268e+06	5.9671e+06	2.9151e+06	3.74811e+06	4.14736e+06	28.32	4.82	2.73758e-06
15G256δ	C33 H46 N4 O10	658.321	7.455			121653	87746.7	89323.7	94869.8	82130.6	1.11264e+06	1.42149e+06	2.83043e+06	2.52141e+06	4.13827e+06	28.228	4.82	8.95412e-05
eticyclidine	C14 H21 N	203.168	5.92			312174	234319	234963	191193	176190	6.54979e+06	6.42022e+06	6.79872e+06	7.39036e+06	5.67451e+06	27.952	4.8	2.38119e-07
6E,8E,14E-Hexadecatriene-10,12-diynoic acid	C16 H18 O2	242.131	21.308			468170	406970	496160	497043	565161	1.67766e+07	1.26224e+07	1.38023e+07	1.56535e+07	1.11299e+07	27.818	4.8	1.48047e-09
UW7525000	C8 H12 N2 O	152.095	5.519			824944	322841	1.64392e+06	395780	161159	1.08007e+07	1.3049e+07	3.11202e+06	2.65508e+07	4.97751e+06	27.29	4.77	0.000732558
	C13 H20 O5 S	288.103	6.855			552791	390536	289308	243369	177062	7.87704e+06	7.68417e+06	6.09357e+06	7.99353e+06	7.68741e+06	26.572	4.73	3.92926e-05
	C21 H48 N O4 P3 S2	535.224	7.287			167959	148730	156293	128260	136964	3.09767e+06	4.70925e+06	4.02285e+06	3.01333e+06	3.91613e+06	26.33	4.72	2.4569e-08
Lophachinin D	C20 H26 O4	330.183	7.329			205445	168138	182482	157415	150265	5.55117e+06	4.42214e+06	3.38884e+06	6.53477e+06	3.9373e+06	26.301	4.72	4.52085e-07
Corticosterone	C21 H30 O4	346.214	21.549	67.7	C02140	437872	295560	435074	373762	359407	1.04302e+07	6.97843e+06	1.24783e+07	9.80534e+06	6.6413e+06	26.234	4.71	1.94637e-07
	C14 H14 N10 O5	402.116	4.408			4.06103e+06	2.16558e+06	190514	361772	228800	1.19088e+07	9.43433e+06	8.7624e+06	1.09158e+07	8.07079e+06	26.078	4.7	0.0123173
	C30 H35 N4 O2 P S	546.223	17.716			436653	422000	463788	506127	535754	1.20462e+07	1.31383e+07	9.03857e+06	1.33599e+07	8.86645e+06	25.974	4.7	9.40153e-08
	C24 H38 N8 O5 P2	580.245	7.409			142012	101349	117076	107281	100742	2.77605e+06	3.35392e+06	1.90045e+06	5.49773e+06	2.07912e+06	25.876	4.69	1.95242e-05
8,11,14,18-Eicosatetraynoic acid	C20 H28 O2	300.209	18.379			533768	727599	777876	640874	637556	1.65337e+07	1.81619e+07	9.97691e+06	1.99767e+07	1.17764e+07	25.799	4.69	1.05379e-06
	C16 H41 N6 P	348.314	15.117			483875	312668	929223	241822	243491	1.45914e+07	6.04654e+06	8.02248e+06	2.8585e+07	1.55811e+06	25.658	4.68	0.00146004
	C23 H46 N2 O2	382.356	11.28			2.9047e+06	2.5034e+06	8.13124e+06	918010	252241	6.34599e+07	6.40716e+07	3.92299e+07	2.70756e+08	8.7248e+07	25.594	4.68	0.00101787
	C23 H16 N10 O6	528.127	6.9			181515	136696	178366	135279	92338.8	1.98692e+06	3.41028e+06	1.61118e+06	4.20348e+06	3.85098e+06	24.948	4.64	4.14317e-06
	C24 H32 N6 O3 S	484.223	23.245			1.59423e+06	241519	853625	219832	186528	5.34069e+06	7.61366e+06	3.23945e+06	1.20326e+07	5.96227e+06	24.687	4.63	0.0014367
	C11 H27 N8 O4 P S	398.161	6.749			544481	443503	652762	363084	175887	9.61761e+06	1.08014e+07	8.51952e+06	1.23759e+07	1.1882e+07	24.355	4.61	5.30422e-05
	C25 H46 N2 O2	406.356	24.968			752469	227928	490264	239610	236083	6.13571e+06	5.82158e+06	4.02957e+06	2.1899e+07	3.29892e+06	24.296	4.6	0.000149917
	C16 H32 N5 O4 P S	421.192	7.525			222268	170623	221581	134288	120074	4.13628e+06	4.96427e+06	1.96175e+06	7.45131e+06	2.84205e+06	24.242	4.6	1.60105e-05
4-[4-(2,1,3-Benzothiadiazol-5-yl)-1-piperazinyl]-2-methylbutyl 4-(dimethylamino)benzoate	C24 H31 N5 O2 S	453.218	6.533			344382	275610	293803	247828	203600	6.94201e+06	6.63776e+06	2.90415e+06	1.04009e+07	2.03361e+06	24.084	4.59	0.00035933
N,N'-1,3-Propanediylbis(2-propylpentanamide)	C19 H38 N2 O2	326.293	20.37			2.34428e+07	5.01428e+06	2.32613e+07	5.1692e+06	537937	1.23799e+08	1.52888e+08	4.73914e+07	2.59174e+08	1.04365e+08	23.949	4.58	0.00914818
	C22 H46 N2 O2	370.356	13.176			233074	215158	749193	228002	218744	6.82361e+06	5.4299e+06	3.49435e+06	1.36814e+07	982514	23.815	4.57	0.00133144
	C14 H25 N4 O4 P	344.162	23.565			2.68052e+06	1.89122e+06	743141	2.58635e+06	1.30882e+06	5.24116e+07	4.49603e+07	3.69003e+07	5.6915e+07	3.04147e+07	23.773	4.57	2.44587e-05
2-Methyl-2-propanyl (2E)-2-(3,7-dimethyloctylidene)-1-(5-methyl-1-hexen-3-yl)hydrazinecarboxylate	C22 H42 N2 O2	366.324	11.646			1.26715e+06	2.10597e+06	3.78677e+06	1.34698e+06	297271	3.08086e+07	3.19498e+07	3.27845e+07	5.54736e+07	6.77648e+06	23.719	4.57	0.000697963
Norethindrone	C20 H26 O2	298.193	22.877			331478	320955	361826	328314	319817	1.13161e+07	7.30064e+06	7.75683e+06	9.85654e+06	5.95944e+06	23.626	4.56	4.93295e-06
methyl 8R,9R-epoxy-13Z,15Z-eicosadien-4,6-diynoate	C19 H24 O3	300.172	14.308			494696	441210	547121	549070	468082	1.85688e+07	1.16355e+07	1.11046e+07	1.99267e+07	7.50457e+06	23.52	4.56	2.75786e-05
	C21 H43 N9 O3	469.351	23.323			2.69096e+06	317860	1.03476e+06	348200	251825	8.18514e+06	1.1177e+07	3.22204e+06	1.95833e+07	7.34621e+06	23.507	4.56	0.00174588
	C22 H46 N2 O3	386.351	7.724			306638	390212	689391	219711	186332	1.04698e+07	7.08274e+06	4.19494e+06	7.57067e+06	1.532e+06	23.098	4.53	0.000239907
	C21 H44 N2 O3	372.335	7.678			280345	115618	239359	119121	125748	2.58418e+06	2.88906e+06	1.71683e+06	4.29377e+06	3.31779e+06	22.975	4.52	3.82498e-06
Brosimacutin H	C20 H24 O6	360.157	18.941			1.24229e+06	743956	675341	1.55973e+06	526684	2.6483e+07	1.69618e+07	1.08097e+07	4.78485e+07	9.81444e+06	22.799	4.51	5.43275e-05
	C14 H27 N4 O2 P	314.188	24.181			547600	461788	850814	543989	495085	2.03419e+07	1.11302e+07	1.60321e+07	1.22724e+07	1.17247e+07	22.56	4.5	3.50478e-08
	C14 H27 N4 O3 P	330.183	24.413			513793	463022	549958	530650	517877	1.34252e+07	8.18464e+06	1.26501e+07	1.16186e+07	8.85994e+06	22.435	4.49	1.65836e-06
	C15 H12 N10 O4	396.105	4.551			395465	503918	176360	534399	84171.6	7.96931e+06	8.86909e+06	3.56203e+06	3.2304e+07	2.15178e+07	22.427	4.49	0.000114694
	C19 H31 N3 O2	333.241	7.753			1.78535e+06	578821	1.73286e+06	404731	585431	1.82984e+07	1.21994e+07	1.47481e+07	1.31202e+07	2.9397e+06	22.411	4.49	0.000497756
	C24 H18 N4 O9	506.106	6.876			6.77417e+06	721379	352425	717125	503428	1.60669e+07	1.58315e+07	3.02373e+07	7.04471e+06	5.6245e+07	22.405	4.49	0.00170207
	C18 H22 N8 S2	414.14	23.297			1.15144e+06	212525	1.40964e+06	177889	153893	4.5181e+06	5.65688e+06	2.44254e+06	8.67926e+06	4.70285e+06	22.128	4.47	0.00413672
	C23 H46 N2 O6	446.335	9.354			3.6375e+06	1.56251e+06	5.23191e+06	1.49891e+06	249492	2.30901e+07	3.40821e+07	5.05688e+07	7.12994e+07	2.26681e+07	21.812	4.45	0.00223161
	C12 H17 N4 O6 P	344.089	7.598			261229	369312	251782	334625	224389	1.61906e+06	6.26241e+06	5.6819e+06	4.73173e+06	8.67297e+06	21.751	4.44	0.000276594
N-[(Z)-hexadec-9-enoyl]glycine methyl ester (Z9-C16:1-NAGME)	C19 H35 N O3	325.261	25.267			766416	436919	612993	358485	535034	1.15831e+07	1.05642e+07	1.36004e+07	3.0968e+07	4.26422e+06	21.649	4.44	0.000190722
5-sec-Butyl-3-methoxy-2-methylpyrazine	C10 H16 N2 O	180.126	8.031			843457	284418	505636	216005	148058	6.14155e+06	6.55874e+06	1.59651e+06	1.24992e+07	1.34198e+06	21.593	4.43	0.0020064
Brosimacutin H	C20 H24 O6	360.157	22.794			617337	492859	383035	637803	469379	1.36009e+07	1.0627e+07	6.63981e+06	1.40688e+07	7.23064e+06	21.562	4.43	1.49512e-06
N,N'-1,2-Ethanediylbis(2-propylpentanamide)	C18 H36 N2 O2	312.277	18.851			6.29887e+06	1.40891e+06	4.3194e+06	1.25833e+06	506913	3.02568e+07	3.1497e+07	9.03474e+06	3.94809e+07	7.3648e+06	21.475	4.42	0.00433507
Methyl 3,4-didehydroibogamine-18-carboxylate	C21 H24 N2 O2	336.184	6.498			453625	172875	872298	140609	108582	3.90001e+06	9.44456e+06	308613	3.66153e+06	1.05608e+06	21.18	4.4	0.0206533
Methanetetrayl tetraacetate	C9 H12 O8	248.053	3.99			369561	279887	407354	644585	226588	5.53543e+06	8.10686e+06	5.8863e+06	8.45128e+06	7.82179e+06	21.165	4.4	6.99584e-06
	C16 H40 N5 O2 P	365.293	25.65			621048	320414	394648	472681	317950	8.56327e+06	8.31166e+06	2.18874e+06	3.41587e+07	1.09598e+06	21.061	4.4	0.0105692
	C23 H44 N2 O2	380.34	12.327			6.68538e+06	8.00957e+06	2.65448e+07	4.84059e+06	729187	1.15491e+08	1.45312e+08	1.29727e+08	3.10161e+08	1.4037e+08	20.997	4.39	0.0031967
	C13 H25 N7 O2 S	343.178	8.147			195898	191774	265149	168214	152463	4.00741e+06	5.39485e+06	2.06117e+06	6.83683e+06	2.20675e+06	20.897	4.39	6.58108e-05
N-Octylacrylamide	C11 H21 N O	183.162	14.528			2.07474e+06	1.76462e+06	4.96278e+06	2.06242e+06	3.21052e+06	5.06983e+07	4.26709e+07	1.88989e+07	6.13286e+07	2.42608e+07	20.567	4.36	2.26851e-05
	C17 H41 N10 O P	432.32	8.942			1.07534e+06	535886	1.50421e+06	245203	213951	1.12457e+07	1.09856e+07	6.99353e+06	1.25117e+07	1.63704e+06	20.5	4.36	0.00145149
	C12 H20 N2 O5 S	304.109	6.118			653934	210789	200395	206356	313067	2.62097e+06	4.31696e+06	7.16564e+06	5.12225e+06	1.6584e+06	20.48	4.36	7.51652e-05
Mesityl phenyl ketone	C16 H16 O	224.12	21.317			468432	405586	492483	491337	556354	1.37684e+07	9.96333e+06	9.87541e+06	1.22393e+07	7.84256e+06	20.278	4.34	1.2003e-07
	C21 H35 N6 O P3 S	512.183	7.373			150545	105864	118455	111431	89513	3.84497e+06	2.21242e+06	1.91852e+06	3.48656e+06	1.36988e+06	19.855	4.31	1.3196e-05
	C14 H32 Cl N4 O2 P	354.196	24.567			330898	369445	253856	311658	222843	9.33117e+06	5.44541e+06	9.38634e+06	6.18422e+06	6.10192e+06	19.843	4.31	4.04671e-08
	C25 H21 N2 O3 P S	460.101	6.841			247826	194954	201991	126669	80781.1	3.18968e+06	3.86589e+06	2.12577e+06	5.21221e+06	4.2071e+06	19.83	4.31	3.13618e-06
	C24 H27 N5 O2 S	449.187	6.889			273117	187413	222811	153870	85478	3.72726e+06	3.71104e+06	1.31273e+06	7.64821e+06	2.19204e+06	19.801	4.31	7.91277e-05
	C21 H43 N9 O3	469.351	22.917			2.8927e+06	514721	1.76525e+06	473654	199950	1.01423e+07	1.23422e+07	3.97099e+06	1.68602e+07	9.63768e+06	19.704	4.3	0.00348573
	C13 H30 N6 S	302.224	24.478			368229	398026	325933	341952	350360	8.7946e+06	5.74172e+06	6.62381e+06	8.11808e+06	6.90284e+06	19.702	4.3	8.06019e-08
	C29 H48 O4 P2 S	554.274	6.183			250021	223768	209617	180154	154617	1.14251e+07	4.09351e+06	3.88582e+06	7.311e+06	2.68461e+06	19.529	4.29	8.55033e-05
1,3-Divinyl-2-imidazolidinone	C7 H10 N2 O	138.079	5.208	72.4		1.0541e+06	387973	900850	327632	202581	7.55628e+06	9.33012e+06	1.99198e+06	1.77049e+07	2.78713e+06	19.476	4.28	0.00134971
Jietacin B	C19 H36 N2 O2	324.277	7.835			3.67105e+06	5.3613e+06	1.4121e+07	3.03382e+06	604854	5.78178e+07	7.94299e+07	7.13292e+07	9.17789e+07	6.69852e+07	19.43	4.28	0.00364157
	C16 H14 O P2	284.053	5.377			279558	218607	242021	178833	139331	5.32389e+06	4.24479e+06	2.16253e+06	5.78824e+06	2.79287e+06	19.418	4.28	4.66958e-06
Palmitoleic acid	C16 H30 O2	254.225	22.507	64.3	C08362	437043	912724	1.46295e+07	669835	382059	1.64595e+07	1.15326e+07	1.17082e+07	1.76069e+07	1.28296e+07	19.153	4.26	0.018383
Cytosine	C4 H5 N3 O	111.044	2.312	99.4	C00380	3.3037e+07	1.43303e+06	3.57239e+07	6.32448e+06	5.3723e+06	2.07777e+08	1.20914e+08	5.84844e+07	1.08072e+08	1.91393e+08	19.118	4.26	0.00923862
	C22 H29 N4 O7 P S2	556.121	6.317			341166	257203	363920	290020	228204	4.20044e+06	5.49523e+06	3.22477e+06	6.93538e+06	1.18539e+07	18.948	4.24	4.68739e-05
Dracocephalumoid A	C20 H24 O5	344.162	19.771			8.70885e+07	5.04972e+07	4.20005e+07	6.94005e+07	3.89245e+07	1.80913e+09	9.45139e+08	7.45484e+08	1.48541e+09	6.85386e+08	18.717	4.23	2.98152e-06
L-Histidine	C6 H9 N3 O2	155.068	6.241	98.5		1.2964e+06	1.18627e+06	1.04276e+06	1.20409e+06	1.3342e+06	4.16749e+07	2.25086e+07	1.77229e+07	3.32344e+07	1.79477e+07	18.693	4.22	2.75159e-05
	C16 H28 N2 O3	296.21	7.107			604753	427930	252507	766330	1.40384e+06	1.13001e+07	1.31995e+07	1.09884e+07	1.52994e+07	8.86528e+06	18.685	4.22	0.00021751
	C23 H43 N9 O6 P2 S	635.251	7.02			203020	151236	148124	172085	121141	1.92088e+06	2.81587e+06	7.03298e+06	621439	4.83815e+06	18.619	4.22	0.00212966
5-(5,7-Dihydroxy-3-methoxy-4-oxo-4H-chromen-2-yl)-2-hydroxyphenyl beta-D-xylopyranoside	C17 H17 N8 O8 P	492.09	6.475			201832	186820	210745	163583	154898	2.78615e+06	3.45317e+06	4.32982e+06	2.04651e+06	7.39882e+06	18.484	4.21	7.59712e-05
(4E,8E,9Me-d19:2)sphingosine	C19 H37 N O2	311.282	25.226			867056	3.79397e+06	2.0637e+06	2.41333e+06	5.12377e+06	7.04061e+07	4.45274e+07	4.30996e+07	9.85597e+07	1.74255e+07	18.451	4.21	0.000108942
	C23 H48 N2 O3	400.366	7.867			1.65697e+06	1.62399e+06	7.34487e+06	875526	103431	2.54263e+07	2.98919e+07	1.63115e+07	8.7804e+07	3.67441e+07	18.406	4.2	0.00544636
	C38 H30 N4 O5 P2	684.169	7.058			222648	167621	166063	195182	151692	2.86508e+06	3.65372e+06	3.07558e+06	2.77953e+06	4.45712e+06	18.348	4.2	1.14518e-08
MFCD00009299	C16 H25 N3 O2	291.195	5.256			3.1238e+06	485495	2.21352e+06	524733	145931	9.62743e+06	1.72376e+07	3.40598e+06	1.42834e+07	6.8721e+06	18.347	4.2	0.00782679
	C23 H49 P3	418.304	7.673			5.01532e+06	1.84826e+06	6.87652e+06	2.52164e+06	664729	1.94032e+07	4.56046e+07	5.15898e+07	4.60374e+07	2.28204e+07	18.085	4.18	0.00137545
	C29 H50 N6 O2	514.398	19.888			6.89361e+06	2.50716e+06	9.91085e+06	1.79829e+06	1.10914e+06	4.50923e+07	5.76355e+07	2.2805e+07	1.05039e+08	3.06897e+07	17.985	4.17	0.00108063
Ursolic acid	C30 H48 O3	456.36	25.964	92.8	C08988	329474	577945	274982	678772	660696	2.03494e+07	7.62059e+06	2.03606e+07	1.03715e+07	2.77523e+06	17.945	4.17	0.00034616
	C23 H31 N O5 S	433.192	7.44			189903	149537	143131	142490	152430	3.33961e+06	2.67926e+06	2.00513e+06	4.95895e+06	1.68377e+06	17.917	4.16	5.00705e-05
	C23 H46 N2 O2	382.356	11.666			1.68003e+06	1.46796e+06	5.30894e+06	303665	280704	2.93009e+07	2.51936e+07	1.48588e+07	7.65106e+07	2.62953e+07	17.913	4.16	0.00187279
	C24 H43 N4 O9 P	562.279	7.064			198047	143502	148595	175195	136594	5.09935e+06	2.65448e+06	1.81241e+06	3.73576e+06	1.8659e+06	17.864	4.16	4.22739e-05
	C17 H29 N3 O	291.231	8.621			1.19949e+06	174075	726207	188362	159352	9.73393e+06	3.33642e+06	2.89648e+06	6.2131e+06	950252	17.713	4.15	0.00365239
NP-005709	C21 H18 O10	476.095	6.909	85.7		1.34257e+06	249990	191174	175028	141123	3.26728e+06	3.37059e+06	5.0839e+06	1.94376e+06	8.13605e+06	17.631	4.14	0.00105454
N-(9-oxodecyl)acetamide	C12 H23 N O2	235.157	5.548	79.8		691176	545664	741776	320489	552343	8.23e+06	8.67567e+06	9.99344e+06	9.72756e+06	1.08231e+07	17.611	4.14	1.07371e-05
Paenibacillin A	C11 H18 N2 O	194.142	9.185			283261	228355	361408	213218	199805	4.00948e+06	4.91731e+06	566930	1.31127e+07	1.66533e+06	17.558	4.13	0.00838868
	C17 H34 N2 O2	298.262	14.461			1.43126e+07	3.97235e+06	1.95963e+07	5.14478e+06	433876	9.0054e+07	1.29141e+08	3.35619e+07	1.7045e+08	8.10403e+07	17.504	4.13	0.00888449
	C13 H12 N10 O4	372.105	6.045			496451	142822	138222	120948	98219.9	1.46478e+06	2.40943e+06	4.11222e+06	502619	1.08831e+07	17.432	4.12	0.00339905
	C16 H32 N5 O2 P	357.23	7.549			206364	174463	228394	154954	150337	5.20505e+06	3.02257e+06	2.74941e+06	4.95862e+06	2.33592e+06	17.325	4.11	3.90838e-06
	C25 H39 N9 O4 P2	591.261	8.676			160737	146793	143607	152806	145073	2.35236e+06	2.5425e+06	1.09987e+07	559288	4.18014e+06	17.32	4.11	0.00380653
		138.067	8.094			166715	147069	140889	143225	135440	1.98411e+06	3.46739e+06	714822	9.26203e+06	2.47396e+06	17.273	4.11	0.00220723
	C16 H38 N5 O2 P	363.277	24.764			880091	265598	442511	302331	237037	5.21539e+06	6.46544e+06	1.72868e+06	1.89625e+07	1.2304e+06	17.251	4.11	0.00472186
	C27 H45 N7 O	483.367	23.518			1.66359e+06	1.04423e+06	1.63384e+06	573000	413796	1.06592e+07	1.9472e+07	3.54654e+06	2.59469e+07	1.80046e+07	17.242	4.11	0.000459761
	C25 H46 N6 O	446.372	7.865			139509	89844.6	510394	106143	71829.4	1.81135e+06	1.70303e+06	901946	6.10676e+06	1.91143e+06	17.065	4.09	0.000434189
Jietacin A	C18 H34 N2 O2	310.262	7.674			1.23693e+06	2.32542e+06	3.02556e+06	1.23809e+06	419373	2.14005e+07	2.53488e+07	1.6225e+07	2.10206e+07	4.52112e+06	16.978	4.09	0.000802799
6,4'-Dihydroxyaurone 4-O-rutinoside	C27 H30 O14	578.164	5.919			480064	260774	1.13984e+06	143340	872594	5.24177e+06	8.13165e+06	8.10607e+06	8.6547e+06	1.15209e+07	16.939	4.08	0.000903189
		88.0319	7.097			747780	514456	201324	701923	406153	3.16353e+06	8.68851e+06	8.87421e+06	6.7996e+06	1.04377e+07	16.889	4.08	2.93223e-05
	C28 H31 N O3 P2 S	523.148	6.219			307652	267672	294158	228112	193095	4.52055e+06	5.1874e+06	2.7934e+06	6.00866e+06	3.26171e+06	16.888	4.08	1.2351e-06
	C23 H14 N4 S	378.095	5.86			221727	204570	184092	191757	161667	2.367e+06	3.00349e+06	3.23262e+06	8.18393e+06	4.06122e+06	16.858	4.08	7.87722e-05
N-oleoyl methionine	C23 H43 N O3 S	413.296	26.957			617874	539999	660301	660179	651808	1.09851e+07	7.59642e+06	1.2412e+07	3.10935e+07	2.73011e+06	16.853	4.07	0.00210386
	C27 H31 N7 O2	485.252	6.728			550464	548807	488690	554666	434679	1.48364e+07	8.36773e+06	9.15677e+06	1.36901e+07	9.23329e+06	16.824	4.07	1.30196e-06
3-Methyladipic acid	C7 H12 O4	160.072	3.855	94.1	C06104	2.32509e+06	2.17642e+06	1.59121e+06	1.94625e+06	1.88733e+06	2.97062e+07	3.27214e+07	2.03876e+07	4.50753e+07	3.39013e+07	16.813	4.07	1.39132e-06
	C21 H42 N2 O	338.33	16.306			2.86775e+06	1.14911e+06	4.14686e+06	286934	279431	3.26427e+07	1.4882e+07	1.51529e+07	8.7032e+07	1.90486e+07	16.577	4.05	0.00203
1-Adamantan-1-yl-3-dodecylurea	C23 H42 N2 O	362.329	15.777			3.57817e+06	1.94153e+06	7.44967e+06	438464	223299	5.60615e+07	2.71759e+07	2.97631e+07	2.18022e+08	3.21433e+07	16.556	4.05	0.00257432
Topiroxostat	C13 H8 N6	248.081	6.022			282353	216777	194922	199158	302557	3.55639e+06	3.37322e+06	6.82051e+06	2.99342e+06	1.13553e+07	16.406	4.04	9.81326e-05
	C15 H18 N2 O5 S	338.093	7.072			255709	185967	193303	228809	217288	1.50866e+06	3.76151e+06	5.34575e+06	3.56056e+06	937133	16.386	4.03	0.00131835
	C16 H33 N7 O2 P2 S	449.187	24.28			1.88223e+06	1.20756e+06	2.39301e+06	1.22296e+06	963307	2.18194e+07	1.99712e+07	1.18874e+07	3.11668e+07	1.30221e+07	16.33	4.03	6.11336e-06
	C22 H33 N O2 P2	405.197	22.72			313797	321644	310889	341503	380222	5.71859e+06	4.7142e+06	5.24913e+06	8.99906e+06	3.82478e+06	16.32	4.03	1.61423e-05
	C16 H32 N2 O2	284.246	13.098			3.088e+06	986217	2.37602e+06	607226	307211	1.86752e+07	1.95475e+07	5.23455e+06	1.6035e+07	3.39449e+06	16.259	4.02	0.00408595
	C17 H29 Cl N4 O2 P2 S	450.117	23.302			2.1995e+06	412895	2.45182e+06	556610	166608	8.95808e+06	1.13093e+07	5.4175e+06	1.64779e+07	9.01661e+06	16.199	4.02	0.00521776
	C23 H48 N2 O3	400.366	7.96			1.40276e+06	1.93238e+06	8.34939e+06	772025	154174	2.26045e+07	1.99525e+07	1.38043e+07	9.65812e+07	3.66824e+07	16.114	4.01	0.00478203
1-Dodecyl-5-methyl-2-pyrrolidinone	C17 H33 N O	267.256	25.918			390227	488462	737074	856916	1.49546e+06	2.00603e+07	8.61032e+06	1.18018e+07	1.55149e+07	4.02246e+06	16.012	4	8.68924e-05
	C22 H33 N5 O	383.267	23.253			2.7009e+06	1.00695e+06	1.60926e+06	966514	608799	1.07766e+07	1.86789e+07	9.22861e+06	2.24457e+07	1.60193e+07	15.909	3.99	8.12875e-05
Euplectin	C17 H10 O5	294.053	6.7			682325	544187	571174	703476	587749	7.703e+06	1.14699e+07	5.61068e+06	1.51157e+07	9.34124e+06	15.893	3.99	3.25938e-05
	C12 H20 N2 O5 S	304.109	6.528			869650	610557	281924	509418	297526	4.13243e+06	8.06538e+06	1.29179e+07	8.15415e+06	2.49514e+06	15.833	3.98	0.00014559
N-palmitoyl proline	C21 H39 N O3	353.293	25.692			455808	897946	823826	466743	404702	7.38311e+06	8.01436e+06	4.23522e+06	1.7053e+07	4.78029e+06	15.818	3.98	5.79327e-05
	C20 H43 N6 O3 P S	478.286	24.377			2.21891e+06	413407	1.44425e+06	459722	422655	7.33125e+06	7.25105e+06	4.44212e+06	1.24866e+07	6.15632e+06	15.773	3.98	0.00153336
3,4-dimethyl-5-carboxyethyl-2-furanacrylic acid	C12 H14 O5	238.084	6.648			298724	150531	273948	159527	169747	1.14518e+06	2.6717e+06	1.34064e+06	2.86305e+06	6.46629e+06	15.739	3.98	0.000457807
	C14 H13 N5 O3 S	331.072	5.153			287484	261860	494607	181952	162453	9.51878e+06	6.13723e+06	2.39115e+06	4.1175e+06	2.69151e+06	15.724	3.97	3.44597e-05
	C17 H31 N3 O	293.247	10.326			1.88182e+08	2.08553e+07	1.50885e+08	3.1435e+07	1.32603e+07	1.27972e+09	4.19141e+08	4.891e+08	1.01404e+09	1.80372e+08	15.559	3.96	0.006761
N-oleoyl glycine	C20 H37 N O3	339.277	25.684			262666	883983	410178	386096	1.12955e+06	6.77694e+06	6.27864e+06	4.54528e+06	1.23809e+07	2.90912e+06	15.307	3.94	0.00017772
Asperidine A	C18 H29 N O	275.225	23.932			7.65676e+06	4.53349e+06	1.83696e+07	2.44248e+06	1.64116e+06	6.90655e+07	7.93674e+07	4.22038e+07	7.85298e+07	2.67085e+07	15.235	3.93	0.00235118
	C19 H33 N3 O2	335.257	7.641			8.24391e+06	1.01782e+06	3.76821e+06	1.08813e+06	994477	1.75804e+07	1.5297e+07	1.62476e+07	2.3999e+07	5.56211e+06	14.932	3.9	0.00692853
	C23 H46 N2 O	366.361	20.352			3.02667e+06	551586	3.54013e+06	631573	609568	1.85822e+07	5.14208e+06	9.26157e+06	2.09736e+07	4.49767e+06	14.664	3.87	0.00453491
	C24 H47 P S	398.314	24.579			3.40825e+06	542193	1.60862e+06	388512	259255	7.91278e+06	8.68764e+06	4.53797e+06	1.80697e+07	6.84097e+06	14.594	3.87	0.00479421
MFCD01344729	C19 H38 N2 O	310.298	12.441			1.141e+06	724728	1.87933e+06	413336	408890	1.65185e+07	9.70719e+06	7.5703e+06	3.75257e+07	1.05421e+07	14.546	3.86	0.000106588
	C21 H39 N O3 S	385.265	25.489			1.32139e+06	986383	1.06904e+06	827923	945284	1.4627e+07	1.42664e+07	1.22565e+07	3.38709e+07	8.95893e+06	14.463	3.85	8.94521e-05
	C21 H34 N7 O8 P	543.223	7.171			153806	140042	137488	142035	119843	4.12366e+06	1.55891e+06	1.27197e+06	4.3589e+06	2.02411e+06	14.454	3.85	0.000281433
	C26 H48 N8 O4	536.38	19.877			3.40395e+06	1.31001e+06	4.6729e+06	1.05039e+06	610623	1.88172e+07	2.33681e+07	1.06044e+07	3.89855e+07	1.48141e+07	14.364	3.84	0.00110433
N-{[6-(2-Carbamimidamido-1,3-thiazol-4-yl)pyridin-2-yl]methyl}acetamide	C12 H14 N6 O S	290.094	5.277			747804	503171	286342	341827	172647	2.84762e+06	5.14806e+06	8.1516e+06	4.8844e+06	1.83203e+06	14.289	3.84	0.00015283
	C26 H46 N2 O4	450.345	25.428			1.2982e+06	494914	458056	545885	485871	7.06675e+06	8.12941e+06	6.34926e+06	2.27921e+07	3.1807e+06	14.279	3.84	0.000305341
glutamyl-S-allylcysteine	C11 H18 N2 O5 S	290.094	5.647			847191	332472	3.28044e+06	323064	288331	2.76438e+06	4.6595e+06	7.03713e+06	6.13402e+06	1.80787e+06	14.015	3.81	0.0113583
Chartarutine C	C23 H31 N O6 S	449.187	23.68			656549	555452	487985	473933	499107	6.98565e+06	1.08428e+07	727085	2.15973e+07	2.78919e+06	13.996	3.81	0.018134
Ethyltrimethylpyrazine	C9 H14 N2	150.116	6.632			427242	444028	617189	589913	327374	6.19312e+06	1.19717e+07	1.91006e+06	8.92742e+06	2.06431e+06	13.948	3.8	0.00235468
	C20 H38 N4 O5	414.284	13.792			2.69487e+06	883651	870887	623682	202509	9.55373e+06	2.72546e+07	9.88371e+06	2.38675e+07	1.18142e+07	13.566	3.76	0.000673569
	C12 H18 O8 S	322.072	5.365			248215	200408	195176	159713	116598	6.4431e+06	2.52917e+06	635733	8.52583e+06	2.6418e+06	13.536	3.76	0.00247139
	C18 H38 N8 O2 S	430.286	23.739			1.87192e+06	369354	1.34797e+06	288005	327176	4.9634e+06	6.06441e+06	3.9112e+06	1.1451e+07	4.40826e+06	13.438	3.75	0.00250288
N-lauroyl lysine	C18 H36 N2 O3	328.272	7.666			154538	121963	161819	111691	110644	1.63594e+06	1.70095e+06	1.22131e+06	3.52958e+06	459822	13.413	3.75	0.00141861
2-Methyl-2-propanyl (2E)-2-(2,6-dimethylheptylidene)-1-(5-methyl-1-hexen-3-yl)hydrazinecarboxylate	C21 H40 N2 O2	352.309	9.163			3.40275e+06	2.26893e+06	8.83667e+06	1.27401e+06	310417	2.8012e+07	4.03199e+07	3.03317e+07	4.56703e+07	2.24256e+07	13.368	3.74	0.00602014
Triacsin A	C11 H19 N3 O	209.153	4.642			327731	245628	702523	192728	129560	3.25974e+06	4.75931e+06	2.00437e+06	1.24297e+07	2.33994e+06	13.271	3.73	0.000282754
	C18 H30 N9 O2 P S	467.197	6.355			270576	246271	238617	197268	151568	3.158e+06	5.39795e+06	2.03009e+06	5.0488e+06	1.6456e+06	13.235	3.73	8.90254e-05
	C22 H23 N8 O12 P	622.117	6.292			1.05866e+07	1.56634e+06	1.08985e+06	1.65432e+06	576495	2.05904e+07	1.91282e+07	1.64643e+07	2.78974e+07	2.12411e+07	13.146	3.72	0.0063955
Nigrospin A	C14 H15 N O5	277.095	5.267			1.72699e+06	305117	485477	231558	162381	3.99587e+06	4.77395e+06	2.75938e+06	5.73533e+06	3.05189e+06	13.096	3.71	0.00342118
NP-000308	C16 H12 O6	300.063	9.353	96.2		2.89752e+07	7.52258e+06	7.2133e+06	5.70963e+06	1.71451e+06	7.75391e+07	9.52161e+07	6.64912e+07	9.42662e+07	1.27145e+08	13.068	3.71	0.00367788
	C22 H35 N7 O2 P2	491.234	25.63			258943	279296	207374	297068	298952	3.63672e+06	2.67962e+06	3.79626e+06	1.10093e+07	1.25466e+06	13.021	3.7	0.00147511
	C24 H46 N2 O4	426.345	24.827			3.75753e+06	331381	2.70341e+06	747456	305693	8.50667e+06	1.0053e+07	4.06587e+06	1.85942e+07	9.72968e+06	13.017	3.7	0.00863707
N-oleoyl glutamine	C23 H42 N2 O4	410.314	8.285			206551	187811	628216	157407	169708	1.765e+06	2.42663e+06	1.79668e+06	5.65432e+06	2.46322e+06	12.921	3.69	0.00010367
	C22 H42 N2 O	350.329	17.082			1.37479e+06	730879	2.25307e+06	487438	475285	2.30246e+07	7.37634e+06	9.44381e+06	3.76405e+07	2.17411e+06	12.921	3.69	0.00404528
Galiposin	C17 H12 O6	312.063	6.699			703174	572735	614839	775853	665340	6.26739e+06	8.59073e+06	5.71757e+06	1.1157e+07	8.81248e+06	12.912	3.69	3.82183e-06
	C25 H39 N O4 P2 S	511.205	25.862			926181	370356	525678	655015	526812	7.2116e+06	5.47388e+06	6.77172e+06	2.17045e+07	1.75899e+06	12.854	3.68	0.00230398
	C10 H24 N9 O8 P	429.148	23.29			1.11556e+06	278253	1.55208e+06	325354	160973	3.87865e+06	5.47132e+06	2.82992e+06	8.84004e+06	4.18161e+06	12.852	3.68	0.00370312
	C23 H48 N7 O4 P	517.351	23.755			1.34307e+06	465925	1.38442e+06	373727	415886	5.18719e+06	5.98331e+06	2.46224e+06	1.14124e+07	6.97628e+06	12.842	3.68	0.000569375
	C17 H36 N4 O7	408.26	19.916			898664	544722	410898	448556	408901	5.74839e+06	7.55053e+06	2.1585e+06	1.30747e+07	4.22041e+06	12.815	3.68	0.000446344
2-hydroxy-10-undecenoic acid	C11 H20 O3	200.14	8.001			161641	315088	275588	441466	172870	6.04087e+06	3.53023e+06	1.93434e+06	3.22091e+06	3.56921e+06	12.81	3.68	8.91777e-06
	C30 H43 N3 O9 P2	651.246	7.306			156562	137636	139567	116915	120978	1.59329e+06	1.75678e+06	4.6059e+06	532700	3.22608e+06	12.764	3.67	0.00181202
	C23 H46 N2 O3	398.351	8.301			2.47042e+06	1.39174e+06	4.31393e+06	545119	319965	1.7761e+07	2.18249e+07	1.42771e+07	3.91236e+07	1.7193e+07	12.762	3.67	0.00246656
1-(12-Aminododecyl)-2-pyrrolidinone	C16 H32 N2 O	268.251	8.49			711708	1.18314e+06	938955	384208	144731	1.37563e+07	9.07581e+06	3.35007e+06	9.8545e+06	1.42659e+06	12.752	3.67	0.00309601
	C23 H44 N2 O4 S	444.302	24.288			1.22004e+07	3.19156e+06	9.98244e+06	2.84798e+06	833353	4.06161e+07	4.39139e+07	2.04125e+07	6.2669e+07	3.87137e+07	12.726	3.67	0.00652087
{3-[(3aS,4S,6aR)-2-Oxohexahydro-1H-thieno[3,4-d]imidazol-4-yl]propyl}malonic acid	C11 H16 N2 O5 S	288.078	4.822			1.3309e+06	524033	643916	641384	338713	4.21959e+06	8.49793e+06	1.07461e+07	8.16137e+06	2.73753e+06	12.725	3.67	0.000157051
	C16 H43 N9 O3 S	441.32	21.956			5.01741e+06	903537	1.6491e+06	710132	316992	1.19768e+07	1.14942e+07	5.92299e+06	1.79133e+07	8.15634e+06	12.721	3.67	0.00564098
Iromycin A	C19 H29 N O2	303.22	19.86			3.61669e+06	2.92376e+06	1.0434e+07	1.63724e+06	738784	3.7082e+07	4.11971e+07	1.32331e+07	9.53007e+07	2.08257e+07	12.683	3.66	0.00216315
FL1ABGGS0001_a	C16 H12 O7	316.058	8.068			2.0875e+07	1.14821e+07	4.48635e+06	1.06429e+07	3.12994e+06	1.29126e+08	1.54002e+08	9.93034e+07	1.34566e+08	1.50466e+08	12.644	3.66	0.000897191
	C18 H38 N2 O	298.298	14.28			798632	733235	2.12957e+06	464328	393091	2.40978e+07	9.24075e+06	8.18337e+06	2.55333e+07	2.04933e+06	12.603	3.66	0.00224203
Linoleamide	C18 H33 N O	279.256	20.607			9.2864e+06	3.42774e+06	9.89151e+06	7.38519e+06	6.50227e+06	9.47924e+07	8.96336e+07	9.29594e+07	1.5794e+08	8.85971e+07	12.587	3.65	1.02859e-05
N-palmitoyl methionine	C21 H41 N O3 S	387.281	26.618			1.6004e+06	822261	1.18025e+06	677543	939269	1.39388e+07	1.18042e+07	1.16021e+07	3.75904e+07	4.20411e+06	12.567	3.65	0.000831457
	C32 H28 O	428.215	4.541			214181	260466	186947	130885	64492.2	1.56208e+06	2.34939e+06	1.06867e+06	3.77184e+06	4.04533e+06	12.567	3.65	6.43117e-05
Palmitoleoyl-EA	C18 H35 N O2	297.267	16.048			826728	2.05481e+06	2.53224e+06	1.16851e+06	1.067e+06	1.84834e+07	1.46758e+07	1.12049e+07	2.4752e+07	9.58325e+06	12.559	3.65	2.98947e-05
Sumalarin A	C20 H26 O8 S	426.135	6.986			252356	196493	246574	178067	112536	2.45899e+06	3.38454e+06	1.338e+06	5.08904e+06	1.65226e+06	12.514	3.65	5.57246e-05
SN3500000	C15 H27 N3 O	265.215	7.912			1.77423e+08	3.85066e+07	1.48179e+08	4.21843e+07	2.10887e+07	1.22285e+09	5.26893e+08	4.56044e+08	7.18427e+08	1.7326e+08	12.49	3.64	0.00410438
	C22 H40 N8 O2	448.327	24.787			3.73607e+06	330347	2.70341e+06	750311	388520	8.44837e+06	1.0008e+07	4.05922e+06	9.36377e+06	1.00774e+07	12.48	3.64	0.0109333
2-(Benzyloxy)-1-(2-methoxy-1-naphthyl)phenanthrene	C32 H24 O2	440.177	7.89			161400	111291	141676	92400.8	75075.2	4.30408e+06	1.38765e+06	1.28819e+06	3.47217e+06	872995	12.469	3.64	0.000233505
		96.0675	1.233			1.74028e+06	5.95806e+06	1.02633e+07	900702	423450	2.16475e+07	2.41578e+07	4.12383e+06	4.1998e+07	8.75177e+06	12.439	3.64	0.0277618
	C28 H44 N7 O3 P3 S	651.246	7.116			239555	147377	138977	142886	160370	1.2539e+06	1.82872e+06	3.86529e+06	317631	2.21939e+06	12.408	3.63	0.00535464
	C21 H42 N2 O2	354.324	8.707			1.18245e+06	1.26156e+06	4.11278e+06	302154	153832	1.40361e+07	1.46709e+07	8.8293e+06	4.14559e+07	1.56913e+07	12.407	3.63	0.00375481
2-tert-butylazo-2-hydroxy-5-methylhexane	C11 H24 N2 O	200.189	5.636			1.45541e+06	1.28947e+06	2.33676e+06	434034	282530	1.05773e+07	1.59999e+07	6.99628e+06	2.33959e+07	1.59511e+07	12.37	3.63	0.000878322
ethyl 5R,6R-epoxy-7-eicosynoate	C22 H38 O3	350.282	25.469			2.87614e+06	1.23655e+07	4.18133e+06	3.66128e+06	1.55218e+06	4.75121e+07	5.53472e+07	3.56384e+07	4.51767e+07	2.40692e+07	12.339	3.63	0.00103884
MFCD04107512	C14 H23 N3 O	249.184	3.8			1.50465e+07	5.20422e+06	1.13471e+07	2.88812e+06	476464	6.35474e+07	8.44247e+07	3.78131e+07	7.60267e+07	4.55568e+07	12.211	3.61	0.0107797
	C23 H43 N3 O6	457.316	16.348			222416	208662	932666	217180	201291	2.1043e+06	4.4356e+06	2.03926e+06	1.62567e+07	2.65102e+06	12.207	3.61	0.000882656
		466.34	24.626			1.15499e+06	256826	362462	262748	258597	3.31395e+06	3.18951e+06	1.97274e+06	7.10178e+06	1.99993e+06	12.139	3.6	0.000527859
alpha-N-(3-hydroxyoctadecanoyl)-L-ornithine	C23 H46 N2 O4	414.346	6.902			3.23537e+06	515097	879585	341128	330048	6.23486e+06	6.77219e+06	3.11221e+06	8.35507e+06	5.62887e+06	12.104	3.6	0.00509664
	C17 H31 N O2 S	313.208	24.309			1.25644e+06	319198	717677	373624	312397	4.51565e+06	7.02968e+06	3.10325e+06	1.09514e+07	4.35206e+06	12.086	3.6	0.000173573
	C19 H33 N2 O5 P S	432.183	7.299			1.38671e+06	234622	270836	274052	142037	3.15139e+06	5.49841e+06	1.2578e+06	5.80862e+06	3.26128e+06	12.042	3.59	0.00150222
	C21 H44 N3 O6 P	465.295	9.496			1.97467e+06	688156	1.25971e+06	415976	193732	5.46742e+06	8.27352e+06	2.21817e+06	1.20179e+07	8.46278e+06	12.023	3.59	0.00266843
NP-001834	C18 H10 N10 O5	446.085	6.894			5.40188e+06	1.06663e+06	399407	1.07717e+06	466064	8.98254e+06	1.28122e+07	1.48103e+07	9.47342e+06	2.57309e+07	12.012	3.59	0.00312356
Coibacin A	C19 H24 O2	284.178	6.585			206006	164137	178186	153100	146005	8.492e+06	1.94333e+06	1.96311e+06	3.75392e+06	1.38915e+06	11.96	3.58	0.000740797
	C22 H42 N8 O2	450.345	25.587			505513	340270	420443	339639	305960	4.90371e+06	4.03758e+06	3.62882e+06	1.1627e+07	1.87364e+06	11.866	3.57	0.000638716
pentaquine	C18 H27 N3 O	301.215	4.46			705507	582047	793411	396435	293912	7.42621e+06	1.6711e+07	1.44736e+06	6.8597e+06	2.34258e+06	11.785	3.56	0.0042632
	C17 H29 N3 O2	307.226	7.21			5.24466e+06	622647	2.01524e+06	526175	674936	1.51342e+07	8.5821e+06	6.38352e+06	7.94408e+06	1.44835e+06	11.77	3.56	0.022859
	C15 H11 N6 O P	322.072	4.92			738783	709547	720988	611713	570560	8.31084e+06	8.03734e+06	7.90985e+06	9.01952e+06	9.3952e+06	11.713	3.55	1.51852e-09
	C23 H21 N5 O2	399.17	23.522			6.71086e+06	1.07853e+06	1.15213e+07	1.16325e+06	225955	1.35853e+07	1.60111e+07	4.77031e+06	2.61521e+07	1.2706e+07	11.679	3.55	0.0492463
	C25 H41 N7 O	455.336	21.939			3.01214e+06	1.00947e+06	2.03132e+06	594948	229721	1.08689e+07	1.67038e+07	4.21141e+06	1.96833e+07	1.17611e+07	11.651	3.54	0.00290946
1-Dodecyl-2-pyrrolidinone	C16 H31 N O	253.24	10.034	62.9		4.97653e+06	6.41481e+06	1.18173e+07	3.70612e+06	280775	9.10719e+07	5.72538e+07	3.53653e+07	8.04107e+07	1.27077e+07	11.505	3.52	0.0113282
	C21 H42 N5 O2 P	427.308	26.4			1.56635e+06	666181	1.24352e+06	962397	1.03041e+06	1.50923e+07	9.66246e+06	1.18265e+07	3.68016e+07	3.31656e+06	11.477	3.52	0.00204233
	C26 H42 N8 O10	626.303	5.035			824611	168161	184334	174455	206558	3.22306e+06	878921	981334	2.15234e+06	2.11491e+06	11.473	3.52	0.00140861
2-Isobutyl-3-methoxypyrazine	C9 H14 N2 O	166.111	6.502			206288	153718	261208	130866	110807	1.76076e+06	1.78327e+06	172286	5.63531e+06	305730	11.454	3.52	0.0465864
	C23 H37 N7 O	427.304	20.816			9.90371e+06	2.9478e+06	5.56626e+06	2.35502e+06	539264	3.21997e+07	3.82347e+07	1.25215e+07	5.94533e+07	3.37593e+07	11.452	3.52	0.00498939
	C33 H26 N4 O7 P2	652.128	6.121			1.52308e+06	375759	186298	264833	176131	2.96405e+06	2.51158e+06	3.02701e+06	3.07161e+06	3.9361e+06	11.43	3.51	0.00459458
	C4 H9 N8 O3 P	248.053	3.715			1.18653e+06	1.09803e+06	817265	1.1958e+06	1.13114e+06	9.41773e+06	1.4301e+07	9.6278e+06	1.39718e+07	1.29156e+07	11.418	3.51	6.25259e-08
(4,7-Dimethyl-1,4,7-triazonan-1-yl)acetic acid	C10 H21 N3 O2	215.163	3.74			4.28817e+06	887078	2.48897e+06	1.03002e+06	1.00658e+06	1.17268e+07	2.2892e+07	5.89317e+06	1.82952e+07	1.00379e+07	11.385	3.51	0.000932
2-(3,4-Dihydroxyphenyl)-5-hydroxy-4-oxo-4H-chromen-7-yl 6-O-(6-deoxy-alpha-L-mannopyranosyl)-beta-D-glucopyranoside	C27 H30 O15	594.159	6.115	97.9		1.25789e+06	505082	183342	668412	320089	5.15753e+06	9.44523e+06	5.72622e+06	4.91508e+06	1.0866e+07	11.337	3.5	0.000368483
4-(3-(4-PIPERIDYL)PROPYL)-1-PIPERIDINEETHANOL	C15 H30 N2 O	254.236	7.535			1.30441e+06	951636	1.83165e+06	522463	143604	9.43415e+06	1.2182e+07	5.10357e+06	1.70608e+07	1.07515e+07	11.298	3.5	0.00206721
	C6 H16 N5 O3 P	237.1	6.337			1.03889e+06	291108	1.39066e+06	280990	566608	7.91735e+06	6.3879e+06	5.89281e+06	7.73041e+06	6.10789e+06	11.274	3.49	0.00133456
NP-008309	C11 H13 N O3	207.089	6.45	89.3		1.03673e+06	701536	730911	483780	307551	7.32334e+06	6.55086e+06	7.90397e+06	9.67795e+06	2.24704e+07	11.267	3.49	1.69436e-05
NP-015559	C17 H14 O7	330.074	9.198	96.9		2.03351e+08	3.53556e+07	2.43079e+07	2.52614e+07	1.18468e+07	2.83275e+08	3.58887e+08	2.79422e+08	2.82267e+08	4.83825e+08	11.214	3.49	0.00791222
	C21 H40 N5 O2 P	425.293	25.57			1.47862e+06	949639	1.35777e+06	1.28722e+06	890256	1.42952e+07	1.28456e+07	1.46596e+07	4.12656e+07	6.28485e+06	11.105	3.47	0.000546312
	C33 H40 N4 O2 S	556.285	25.977			254000	432576	199697	477936	427560	1.43905e+07	3.76466e+06	1.39079e+07	4.7121e+06	1.7272e+06	11.021	3.46	0.00102088
		153.089	1.221			1.2443e+07	1.42392e+06	5.01398e+06	957897	584550	1.79297e+07	1.56514e+07	8.98533e+06	2.59044e+07	4.9524e+06	10.992	3.46	0.0321994
	C14 H23 N6 O3 P	354.158	8.4			2.77002e+06	367866	1.6649e+06	307234	83688.9	4.04303e+06	4.89192e+06	1.56222e+06	8.35175e+06	3.42716e+06	10.991	3.46	0.0305752
N,N-(2,2-dihydroxy-ethyl) arachidonoyl amine	C24 H41 N O3	391.308	25.633			3.52795e+06	2.65416e+06	3.18892e+06	3.04931e+06	2.30434e+06	4.07738e+07	2.48623e+07	3.3483e+07	8.63549e+07	1.47533e+07	10.981	3.46	0.000724955
	C6 H16 N8 O3 S	280.107	6.675			294277	268293	310996	275280	264459	2.63283e+06	3.26944e+06	3.02132e+06	1.44306e+06	1.03555e+07	10.975	3.46	0.00146527
Myristamidopropyl dimethylamine	C19 H40 N2 O	312.314	15.023			7.49266e+06	3.864e+06	1.36225e+07	1.87726e+06	250790	6.86338e+07	3.39569e+07	3.20234e+07	1.51343e+08	4.23951e+07	10.972	3.46	0.00955274
Palustrine	C17 H31 N3 O2	309.241	7.074			5.61686e+06	859970	3.56504e+06	477310	158437	1.36743e+07	9.42642e+06	9.12791e+06	1.54508e+07	3.91973e+06	10.961	3.45	0.0254361
PGE2alpha dimethyl amine	C22 H41 N O3	367.308	26.147			840823	834633	1.13621e+06	1.20548e+06	360242	1.1738e+07	9.20056e+06	8.00304e+06	2.61186e+07	4.48942e+06	10.942	3.45	0.000158223
FC5250000	C11 H15 N O4 S	257.072	5.622			402942	322600	302973	298863	280258	3.31067e+06	3.75666e+06	1.28521e+06	1.21413e+07	2.24083e+06	10.927	3.45	0.00273928
4-{[5-(7-hydroxy-5,5,8a-trimethyl-2-methylidene-decahydronaphthalen-1-yl)-3-methylpentyl]oxy}-4-oxobutanoic acid	C24 H40 O5	390.274	25.474	91.1		1.43029e+06	1.16575e+07	5.09667e+06	4.91056e+06	3.70791e+06	5.63066e+07	6.45447e+07	4.66749e+07	5.36436e+07	2.74645e+07	10.924	3.45	0.000892023
Miquelianin	C21 H18 O13	478.075	5.922	96.9		237214	168042	142869	136133	109819	1.55745e+06	1.38157e+06	2.30006e+06	823272	4.15911e+06	10.901	3.45	0.000234467
	C23 H46 N2 O2	382.356	7.871			198225	149872	484822	122666	96716.4	1.67572e+06	1.37138e+06	653830	3.60626e+06	1.61809e+06	10.796	3.43	0.000531452
Cys-tyr	C12 H16 N2 O4 S	284.083	4.104			476619	396577	255939	218443	133103	2.75579e+06	3.37784e+06	1.35793e+06	1.19874e+07	1.11728e+06	10.767	3.43	0.00251205
N-Nitroso-N-octyl-1-octanamine	C16 H34 N2 O	270.267	10.037			1.11887e+08	1.46142e+08	2.62322e+08	8.75952e+07	7.64122e+06	1.8727e+09	1.20396e+09	7.40702e+08	1.63388e+09	2.79442e+08	10.761	3.43	0.0107508
N-arachidonoyl isoleucine	C26 H43 N O3	417.324	23.095			2.90754e+06	1.49976e+06	5.79679e+06	1.12465e+06	633112	1.43735e+07	2.40003e+07	1.13273e+07	8.47615e+07	1.61171e+07	10.746	3.43	0.00135753
N-stearoyl glutamine	C23 H44 N2 O4	412.33	25.714			785043	426165	473081	455018	413342	4.88388e+06	5.67478e+06	3.94212e+06	1.72853e+07	2.49616e+06	10.733	3.42	0.000873577
	C18 H44 N5 O2 P	393.324	26.51			3.50966e+06	2.1342e+06	2.36547e+06	2.56632e+06	2.15114e+06	2.8936e+07	1.90664e+07	2.52516e+07	6.90698e+07	7.12604e+06	10.675	3.42	0.00280456
	C23 H31 N O5 P2	463.166	6.376			364660	329763	350853	279489	156631	3.85265e+06	3.52005e+06	1.65941e+06	9.6296e+06	1.62551e+06	10.674	3.42	0.000653267
	C17 H34 N2 O	282.267	9.077			3.07405e+06	2.29859e+06	5.35929e+06	1.11391e+06	268774	3.04243e+07	2.42923e+07	1.31097e+07	5.89205e+07	2.24262e+07	10.568	3.4	0.00318322
1-(12-Aminododecyl)-2-pyrrolidinone	C16 H32 N2 O	268.251	8.669			716011	1.16968e+06	1.15438e+06	244972	171570	1.34444e+07	7.55883e+06	3.58449e+06	1.00768e+07	1.45152e+06	10.557	3.4	0.00315881
N-Nitroso-N-octyl-1-octanamine	C16 H34 N2 O	270.267	9.035			1.66918e+06	958657	2.54472e+06	811582	169771	1.02287e+07	1.0098e+07	5.09779e+06	1.71853e+07	6.90517e+06	10.533	3.4	0.00454682
	C23 H46 N2 O5	430.34	7.867			184051	171955	621687	139535	93809.6	1.80967e+06	1.65338e+06	986310	6.91226e+06	2.84951e+06	10.524	3.4	0.000637388
	C21 H26 N3 O3 P S	431.143	23.296			2.85664e+07	8.1653e+06	3.39808e+07	7.39139e+06	3.1885e+06	8.38684e+07	1.04664e+08	5.74756e+07	1.74656e+08	8.5796e+07	10.507	3.39	0.00604786
Maniwamycin A	C10 H18 N2 O2	198.137	1.913			9.06668e+06	2.20328e+06	2.67298e+06	4.34198e+06	659420	1.79575e+07	2.81441e+07	3.01896e+07	2.79629e+07	1.16285e+07	10.461	3.39	0.00569046
	C19 H46 N7 O4 P	467.336	21.959			3.91845e+06	1.65306e+06	4.07726e+06	1.12509e+06	386212	1.41678e+07	1.72248e+07	5.89756e+06	2.28817e+07	1.85337e+07	10.42	3.38	0.00440197
NP-021018	C12 H18 O4	226.12	5.638	68.5		914599	532562	734946	649004	759245	7.49822e+06	7.65453e+06	8.20675e+06	7.21421e+06	8.7858e+06	10.415	3.38	1.28414e-06
	C34 H28 N4 O8 P2	682.138	6.109			3.10238e+06	530428	390503	557131	320680	5.05249e+06	5.11677e+06	5.52582e+06	5.50471e+06	5.93007e+06	10.378	3.38	0.00617045
	C26 H43 N7 O	469.351	22.739			3.48888e+06	1.16125e+06	2.26068e+06	888779	178464	9.6562e+06	1.54059e+07	4.6177e+06	2.02657e+07	1.20348e+07	10.364	3.37	0.00675595
	C23 H30 N3 O3 P S	459.175	25.128			2.77625e+06	707038	1.37447e+06	758527	712008	7.75245e+06	9.02382e+06	5.7326e+06	1.90288e+07	3.57739e+06	10.22	3.35	0.00090221
S-(2-Methylpropionyl)-dihydrolipoamide-E	C12 H23 N O2 S2	277.117	2.65			2.97757e+06	1.03666e+07	1.85133e+07	4.73041e+06	1.15092e+07	1.09427e+08	7.97362e+07	5.5744e+07	1.0955e+08	1.05933e+08	10.219	3.35	0.000830529
Guanadrel	C10 H19 N3 O2	213.148	1.822			3.18049e+06	1.75591e+06	2.86381e+06	905291	649664	1.79401e+07	2.62168e+07	8.26807e+06	1.92677e+07	1.09196e+07	10.217	3.35	0.000522908
	C16 H31 N7 O	337.259	16.041			658518	1.95325e+06	2.21249e+06	1.11346e+06	1.18922e+06	1.47156e+07	1.21068e+07	1.07764e+07	1.88047e+07	8.39585e+06	10.181	3.35	6.13157e-05
Wortmannilactone I1	C27 H36 O5	440.256	24.202			710846	496984	900338	699330	773651	7.20926e+06	7.4687e+06	6.41168e+06	8.93995e+06	6.41255e+06	10.142	3.34	2.8493e-07
	C20 H38 N2 O4	370.283	22.628			5.84367e+07	2.79177e+07	8.17245e+07	1.13817e+07	4.0846e+06	2.35134e+08	3.30349e+08	1.49694e+08	4.74566e+08	2.8281e+08	10.13	3.34	0.00794675
	C25 H42 N6	426.346	26.135			370784	454824	465621	474257	458469	5.80982e+06	4.6289e+06	3.22879e+06	1.70725e+07	1.77326e+06	10.096	3.34	0.00287009
	C22 H36 N2 O3	376.272	21.464			2.60115e+06	726837	5.03274e+06	834262	492138	8.40153e+06	1.22604e+07	2.56939e+06	1.81455e+07	6.09331e+06	10.071	3.33	0.0127107
	C10 H19 O5 P	250.097	5.456			476708	740932	425431	1.74745e+06	2.57828e+06	6.214e+06	7.45819e+06	8.68776e+06	4.7764e+06	7.99062e+06	10.066	3.33	0.0035708
	C25 H27 N4 O5 P3	556.121	6.79			505390	401322	627484	355643	163420	3.06665e+06	5.0907e+06	2.15315e+06	6.36549e+06	4.0312e+06	10.045	3.33	6.10503e-05
	C36 H64 N6 O2	612.508	24.26			3.43572e+06	889111	3.7763e+06	893248	700787	8.55276e+06	1.14824e+07	6.77946e+06	1.62122e+07	8.92572e+06	9.992	3.32	0.0041136
LAPAO	C17 H36 N2 O2	300.277	7.284			1.15603e+06	558723	1.41543e+06	226240	132418	5.13335e+06	5.56829e+06	2.6653e+06	1.0604e+07	5.6205e+06	9.966	3.32	0.00359572
2,3-Dihydroxy-N-benzoylserine	C10 H11 N O6	241.058	5.007			4.50291e+06	1.27428e+07	3.72625e+06	8.10027e+06	8.24497e+06	5.82802e+07	1.17199e+08	6.30709e+07	8.02269e+07	1.07027e+08	9.904	3.31	3.99419e-05
	C20 H38 N2 O2	338.293	8.795			711252	981007	1.08852e+06	615036	156366	8.43422e+06	8.28536e+06	6.27206e+06	7.03982e+06	950607	9.898	3.31	0.00475896
	C30 H56 N8 O4	592.442	20.489			2.58766e+06	607451	4.20509e+06	481654	458341	8.72509e+06	5.96194e+06	1.4308e+06	1.24403e+07	4.33092e+06	9.815	3.29	0.0299467
NP-021018	C12 H18 O4	208.11	5.636	91.6		2.35827e+06	800676	509381	705945	4.45553e+06	8.17026e+06	6.72296e+06	7.84319e+06	6.35645e+06	7.93497e+06	9.796	3.29	0.0117851
	C29 H53 N9 O11 P2 S	797.304	7.203			184235	164617	158553	153489	152909	803815	1.55071e+06	4.34343e+06	195062	2.89636e+06	9.78	3.29	0.019915
	C23 H29 N9 O4	495.233	5.296			3.58766e+06	1.4046e+06	539305	454435	116677	5.19861e+06	4.80416e+06	6.18611e+06	6.56874e+06	3.53769e+06	9.639	3.27	0.023128
N-(2E,5Z-dodecadienoyl)-homoserine lactone	C16 H25 N O3	279.183	5.553			607875	451042	449905	677184	696322	6.63421e+06	7.42427e+06	3.40062e+06	5.80597e+06	3.17171e+06	9.551	3.26	2.8447e-05
Pestalotiopamide C	C13 H21 N O5	271.142	6.989			835426	1.15108e+06	1.10971e+06	558671	488541	1.74408e+07	1.08363e+07	7.94808e+06	5.76295e+06	5.92523e+06	9.514	3.25	2.36412e-05
FL1AAAGM0001_a	C16 H12 O5	284.068	6.926			290184	242584	242299	233574	219954	1.93432e+06	4.80816e+06	2.30429e+06	1.94548e+06	4.31581e+06	9.51	3.25	0.000150067
Bavisant	C19 H27 N3 O2	329.211	5.11			329902	226813	207330	184673	138461	1.96345e+06	4.61657e+06	1.42711e+06	3.0709e+06	1.52472e+06	9.47	3.24	4.98183e-05
	C16 H32 N5 O4 P	389.22	7.262			192320	150399	178658	145406	163721	5.61427e+06	1.5504e+06	1.49149e+06	4.5556e+06	1.53999e+06	9.47	3.24	0.000630657
	C19 H40 N5 O2 P	401.292	26.056			347701	409055	438489	537847	481092	5.38308e+06	4.144e+06	3.97582e+06	1.52546e+07	2.67581e+06	9.451	3.24	0.0007369
	C27 H32 N3 O3 P S	509.19	25.04			1.31753e+06	546759	442391	575066	484228	4.7111e+06	5.159e+06	5.23745e+06	1.61637e+07	3.23253e+06	9.436	3.24	0.000225247
N-Methyl-N-nitroso-1-tetradecanamine	C15 H32 N2 O	256.251	9.854			5.97414e+06	8.91039e+06	2.77302e+07	4.53388e+06	2.61444e+06	6.48738e+07	5.63065e+07	2.96416e+07	1.06248e+08	4.76978e+07	9.425	3.24	0.00350726
	C17 H40 N5 O2 P S	409.265	25.035			1.22484e+07	4.30286e+06	4.52638e+06	4.56293e+06	4.75347e+06	3.68066e+07	4.2928e+07	4.37363e+07	1.0421e+08	2.13206e+07	9.408	3.23	0.000275981
3-carboxy-4-methyl-5-propyl-2-furanpropanoic acid	C12 H16 O5	240.099	6.219			1.66715e+06	1.10555e+06	1.21949e+06	1.12179e+06	1.22602e+06	1.14624e+07	1.1274e+07	1.19984e+07	1.19699e+07	7.377e+06	9.399	3.23	1.53936e-07
	C14 H30 N2 O	242.236	7.838			7.36598e+07	1.40295e+08	1.41989e+08	6.68954e+07	1.05669e+07	9.63689e+08	7.75203e+08	3.59931e+08	6.92066e+08	1.31145e+08	9.395	3.23	0.0108048
Palmitoleoyl-EA	C18 H35 N O2	297.266	20.618			7.68283e+06	4.37186e+06	6.95029e+06	4.93727e+06	5.09306e+06	4.55764e+07	4.36656e+07	4.78032e+07	7.95753e+07	5.52666e+07	9.386	3.23	4.80804e-07
	C16 H29 N7	319.249	20.607			7.68283e+06	4.37186e+06	6.95029e+06	4.93727e+06	5.09306e+06	4.55764e+07	4.36656e+07	4.78032e+07	7.95753e+07	5.52666e+07	9.386	3.23	4.80804e-07
	C17 H38 N5 O2 P	375.277	25.754			951013	517485	1.39299e+06	788837	412711	7.60033e+06	7.40286e+06	4.68451e+06	1.72347e+07	3.11043e+06	9.385	3.23	0.000358873
N-linolenoyl glutamic acid	C23 H37 N O5	407.267	22.812			4.06263e+06	1.17602e+06	1.80069e+06	1.07913e+06	962575	1.10258e+07	1.83594e+07	1.08287e+07	2.49801e+07	1.00567e+07	9.376	3.23	0.000218144
	C30 H43 N7 O	517.351	24.167			529408	495698	672811	508768	483970	4.91683e+06	4.77039e+06	1.74073e+06	7.87994e+06	4.43318e+06	9.376	3.23	0.000739897
	C17 H29 N3 O2	307.226	7.068			1.06846e+06	201953	341108	220390	258491	4.87078e+06	3.09264e+06	1.93515e+06	2.42145e+06	475650	9.368	3.23	0.00750242
	C15 H34 N9 O7 P	483.231	4.14			491169	361975	216082	163878	74593.4	3.57693e+06	1.9207e+06	686106	2.01377e+06	2.84266e+06	9.319	3.22	0.00103961
Nostosin B	C22 H37 N5 O5	451.279	9.193			2.46086e+06	1.05477e+06	2.65524e+06	600073	182963	9.80683e+06	1.25505e+07	4.45804e+06	1.86371e+07	8.80211e+06	9.298	3.22	0.00589257
	C35 H71 N4 O3 P	626.523	24.251			1.94781e+07	5.84939e+06	4.73344e+07	4.28101e+06	1.33653e+06	4.7358e+07	5.43407e+07	2.23955e+07	1.03662e+08	5.54718e+07	9.29	3.22	0.0365507
N-stearoyl GABA	C22 H43 N O3	369.324	27.475			933689	426456	1.2962e+06	648926	453056	8.90204e+06	5.84561e+06	6.02645e+06	2.08351e+07	2.32602e+06	9.287	3.22	0.001059
Palustrine	C17 H31 N3 O2	309.241	6.857			5.97623e+06	638982	2.14031e+06	517251	249945	9.29483e+06	5.90976e+06	4.69917e+06	9.45265e+06	3.0014e+06	9.249	3.21	0.0312913
Pilocarpine	C11 H16 N2 O2	208.121	6.495			291913	190053	163485	245088	175836	983492	1.74822e+06	2.17768e+06	5.02448e+06	885333	9.199	3.2	0.00139276
N-oleoyl threonine	C22 H41 N O4	383.303	20.249			946814	1.0033e+06	2.94789e+06	602803	422942	7.57686e+06	8.68699e+06	4.4286e+06	4.94094e+07	1.11727e+07	9.175	3.2	0.00166003
	C16 H37 N6 O3 P	392.267	21.816			642648	1.28774e+06	1.43084e+06	519961	616050	5.0624e+06	5.40528e+06	9.55109e+06	1.16076e+07	5.89544e+06	9.174	3.2	5.24481e-05
(R)-2-Hydroxyputrescine dicinnamamide	C22 H24 N2 O3	364.178	7.042			205065	158218	160843	194260	148763	1.47086e+06	3.55223e+06	443275	2.59501e+06	663257	9.145	3.19	0.00612605
	C25 H25 N5 O2	427.202	25.966			1.05916e+06	553592	450990	837616	590765	5.39541e+06	4.53889e+06	5.5151e+06	1.47222e+07	1.73687e+06	9.133	3.19	0.00199829
5-sec-Butyl-3-methoxy-2-methylpyrazine	C10 H16 N2 O	180.126	7.178			916868	853836	1.68312e+06	537036	183778	7.78712e+06	8.82645e+06	3.41437e+06	9.64101e+06	7.74616e+06	9.12	3.19	0.00131347
3-[(1,2,3,3-Tetramethyl-2-azabicyclo[2.2.2]oct-5-yl)oxy]-1-propanamine	C14 H28 N2 O	240.22	7.355			1.26689e+06	671067	1.21168e+06	594746	688408	6.23873e+06	6.70879e+06	3.50758e+06	1.32856e+07	2.99659e+06	9.063	3.18	0.000584447
Nocarimidazole A	C13 H23 N3 O	237.184	6.843			1.30836e+07	1.9351e+06	5.58159e+06	1.76864e+06	1.39017e+06	3.8862e+07	1.75153e+07	1.28278e+07	2.58678e+07	4.70534e+06	9.051	3.18	0.0207495
	C26 H57 N6 O5 P	564.411	21.539			2.46263e+06	716993	2.68224e+06	380637	270699	6.4743e+06	9.14498e+06	4.44521e+06	1.43471e+07	5.17493e+06	9.03	3.17	0.00746556
1-Dodecyl-5-methyl-2-pyrrolidinone	C17 H33 N O	267.256	10.768			4.19397e+06	3.5429e+06	9.76978e+06	2.04956e+06	309778	3.97816e+07	3.17469e+07	1.93556e+07	7.78325e+07	3.19647e+07	9.022	3.17	0.0068688
	C23 H44 N2 O	364.345	17.778			1.19686e+07	4.53534e+06	1.94717e+07	1.67594e+06	546507	9.95669e+07	3.84238e+07	4.06577e+07	2.60075e+08	4.08131e+07	8.999	3.17	0.00769503
N-stearoyl glutamine	C23 H44 N2 O4	412.33	11.119			1.43913e+06	1.04024e+06	2.53394e+06	618355	324107	8.88271e+06	9.34577e+06	4.70622e+06	3.21057e+07	1.42439e+07	8.984	3.17	0.000831273
Xestoaminol B	C14 H27 N O	225.209	7.838			6.82029e+06	1.23635e+07	1.23224e+07	6.50385e+06	1.43172e+06	8.64657e+07	6.77664e+07	3.21109e+07	6.12538e+07	1.15628e+07	8.981	3.17	0.00749206
	C17 H34 N2 O	282.267	8.855			3.4909e+06	3.67348e+06	6.4139e+06	1.47336e+06	262356	3.70375e+07	3.12786e+07	1.82841e+07	6.94293e+07	2.74964e+07	8.96	3.16	0.00493239
Elaiomycin L	C12 H24 N2 O4	260.174	4.005			8.2035e+06	2.07211e+06	1.14148e+07	2.23961e+06	288349	2.00418e+07	3.40434e+07	8.46357e+06	2.55424e+07	1.57092e+07	8.949	3.16	0.0356441
N-stearoyl glycine	C20 H39 N O3	341.293	25.821			2.19604e+06	1.65051e+06	2.66906e+06	1.72809e+06	491124	1.5638e+07	1.54459e+07	1.1521e+07	3.77434e+07	6.63078e+06	8.938	3.16	0.000543306
Arachidonoyl amine	C20 H33 N O	303.256	25.607			1.3358e+07	1.67732e+07	2.2365e+07	9.02618e+06	7.61101e+06	1.54815e+08	1.21889e+08	1.05172e+08	1.19274e+08	3.06285e+07	8.929	3.16	0.000684942
N~2~-Tetradecanoyl-D-asparagine	C18 H34 N2 O4	342.251	17.907			3.48242e+06	4.95459e+06	8.03292e+06	2.81746e+06	910546	2.49594e+07	3.71503e+07	7.63273e+06	4.21976e+07	3.10824e+07	8.926	3.16	0.00287957
	C19 H35 N O3 S	357.234	23.954			1.17516e+06	456500	1.2829e+06	296718	183967	4.1622e+06	4.03872e+06	3.27645e+06	1.06698e+07	4.06974e+06	8.915	3.16	0.00201283
	C11 H25 N3 O	215.2	2.323			1.59123e+07	6.86701e+06	2.10952e+07	2.76871e+06	313780	6.41391e+07	8.03946e+07	4.74248e+07	5.83723e+07	6.11623e+07	8.907	3.15	0.0261115
Laurolactam	C12 H23 N O	197.178	18.206	96		3.55567e+06	6.72713e+06	7.87792e+06	2.34782e+06	1.09235e+06	3.16352e+07	3.5476e+07	1.12348e+07	3.93812e+07	1.84704e+07	8.897	3.15	0.00266675
Palmitoyl-Met-OH	C19 H37 N O3 S	359.249	25.125			2.05447e+07	5.63254e+06	7.899e+06	5.60801e+06	1.81384e+06	5.00236e+07	5.56027e+07	3.77456e+07	1.04657e+08	2.33544e+07	8.881	3.15	0.00325722
	C25 H44 N2 O2	404.34	23.886			280060	254881	249955	286052	291106	2.47492e+06	2.78877e+06	1.81216e+06	1.08398e+07	1.82411e+06	8.837	3.14	0.00181719
L-Histidine	C6 H9 N3 O2	155.07	6.241	97.2	C00135	2.71108e+06	795927	1.31564e+06	1.12011e+06	2.0236e+06	1.46669e+07	1.15721e+07	9.16712e+06	1.66529e+07	6.89297e+06	8.796	3.14	9.77253e-05
N-(7-methyloctanoyl)homoserine lactone	C13 H23 N O3	241.167	13.845			6.56798e+06	9.86812e+06	1.67988e+07	7.09138e+06	1.02232e+07	8.63983e+07	8.74791e+07	5.91218e+07	1.6646e+08	7.14742e+07	8.755	3.13	1.56552e-05
Leu-ala	C9 H18 N2 O3	202.132	2.021			4.16647e+06	3.17268e+06	1.4777e+07	4.10204e+06	981373	3.58548e+07	3.07976e+07	1.10648e+07	5.64642e+07	3.65352e+07	8.741	3.13	0.00514457
7-Mercaptoheptanoylthreonine	C11 H21 N O4 S	263.119	6.425			954015	672593	1.48476e+06	596510	440902	3.81105e+06	8.23351e+06	3.31768e+06	8.44211e+06	5.87828e+06	8.74	3.13	0.000116143
NP-017152	C13 H23 N O2	247.157	5.141	80.2		2.00352e+06	1.08731e+06	416151	1.24674e+06	300664	9.51112e+06	8.40319e+06	9.01872e+06	1.04606e+07	9.49088e+06	8.729	3.13	0.00217828
	C17 H42 N5 O2 P S	411.28	25.86			6.27826e+06	3.95418e+06	4.20308e+06	5.6897e+06	4.97446e+06	4.3413e+07	3.63696e+07	4.35004e+07	1.10805e+08	1.33366e+07	8.727	3.13	0.00256009
	C22 H28 N6 O4	440.216	5.839			9.68331e+06	1.4782e+06	2.69972e+06	3.3407e+06	1.09755e+06	5.40606e+06	2.49049e+07	2.35096e+07	1.50153e+07	2.44463e+07	8.708	3.12	0.00605169
PGF2alpha dimethyl amide	C22 H39 N O4	381.288	23.43			880973	1.33149e+06	1.96978e+06	616160	530231	7.61281e+06	9.16829e+06	4.66208e+06	1.20831e+07	5.13575e+06	8.641	3.11	0.000210406
3-[(1,2,3,3-Tetramethyl-2-azabicyclo[2.2.2]oct-5-yl)oxy]-1-propanamine	C14 H28 N2 O	240.22	7.174			520667	820087	2.30037e+06	437571	777303	6.68979e+06	5.83808e+06	7.30366e+06	1.00777e+07	4.51824e+06	8.606	3.11	0.000733304
Tetracosahexaenoylethanolamide	C26 H41 N O2	399.314	23.095			1.94394e+06	914262	3.73153e+06	473032	251211	7.48174e+06	1.20877e+07	5.81165e+06	4.00457e+07	7.85233e+06	8.589	3.1	0.00403392
	C17 H37 N6 O3 P	404.267	22.848			6.16821e+06	2.67874e+06	6.41008e+06	1.94814e+06	589122	2.29575e+07	2.84768e+07	1.08265e+07	4.59285e+07	2.06104e+07	8.57	3.1	0.00441698
Hippuric acid	C9 H9 N O3	179.057	5.01	89.2		420423	1.20252e+06	393464	690925	728950	4.74745e+06	9.74765e+06	4.92776e+06	5.88923e+06	9.10748e+06	8.524	3.09	2.6098e-05
	C19 H22 N4 O6	402.152	5.586			245587	205882	196773	227907	148787	1.10896e+06	1.31517e+06	1.74957e+06	2.44351e+06	8.81384e+06	8.498	3.09	0.00223103
	C14 H17 N7 O2 S	347.115	4.161			3.54578e+06	588408	1.032e+06	470270	118488	4.5209e+06	6.10119e+06	2.38751e+06	1.0791e+07	4.99333e+06	8.486	3.09	0.0164043
Genistein	C15 H10 O5	270.053	9.051	98.8	C06563	6.26448e+07	2.54031e+07	1.54547e+07	2.41533e+07	5.5325e+06	1.8935e+08	2.04671e+08	1.47584e+08	2.26868e+08	2.92151e+08	8.474	3.08	0.0029911
	C20 H31 N5 O	357.251	22.505			9.69104e+06	3.84407e+06	8.12611e+06	3.67543e+06	1.53999e+06	2.71713e+07	4.7833e+07	2.23914e+07	5.00507e+07	3.25429e+07	8.466	3.08	0.00156606
N-[(1R)-2-hydroxy-1-methoxy-methyl ethyl]-(4E,7S)-7-methoxy-4-eicosenamide	C25 H49 N O4	427.366	23.047			2.36475e+06	447578	3.17681e+06	661850	665404	7.4174e+06	1.70684e+06	5.6233e+06	1.25455e+07	2.80094e+06	8.451	3.08	0.0224244
Leptosidin 6-glucosyl- (1->4) -rhamnoside	C28 H32 O15	608.174	6.619			2.12007e+06	1.5788e+06	769157	1.42633e+06	1.12978e+06	1.20564e+07	1.36177e+07	1.16107e+07	1.20404e+07	8.28953e+06	8.442	3.08	3.46561e-05
	C38 H56 N8 O8 S	784.393	6.783			3.07955e+06	1.07999e+06	689101	699986	675308	6.58867e+06	5.71265e+06	3.7625e+06	6.14796e+06	5.88884e+06	8.413	3.07	0.00284081
N-myristoyl glutamine	C19 H36 N2 O4	356.267	16.525			2.02577e+07	7.36109e+06	3.50495e+07	8.61689e+06	4.747e+06	7.23491e+07	8.28587e+07	1.94707e+07	1.58065e+08	5.87309e+07	8.396	3.07	0.00901087
	C15 H31 O11 P	418.16	2.302			1.33004e+06	603594	1.0163e+06	304977	215920	1.73535e+07	5.05203e+06	2.86855e+06	3.42856e+06	1.76298e+07	8.37	3.07	0.00142033
Tetrabutylurea	C17 H36 N2 O	284.283	10.774			5.32129e+08	3.94077e+08	1.06583e+09	2.36367e+08	2.14288e+07	3.99888e+09	3.23945e+09	2.02358e+09	7.41881e+09	3.29502e+09	8.361	3.06	0.0139123
N-arachidonoyl dihydroxypropylamine	C23 H39 N O3	377.293	25.212			2.54829e+06	1.45251e+06	1.39602e+06	911699	834664	1.08947e+07	1.21188e+07	1.15611e+07	3.40541e+07	7.96817e+06	8.281	3.05	0.000104137
N-palmitoyl glutamine	C21 H40 N2 O4	384.298	24.866			4.1827e+06	611315	1.1096e+06	914899	387702	7.54804e+06	9.08551e+06	5.36282e+06	1.71461e+07	5.7428e+06	8.25	3.04	0.00348132
		140.057	1.225			1.62861e+07	3.59119e+07	7.57812e+07	1.1612e+07	2.23604e+06	1.34362e+08	1.5304e+08	2.32259e+07	2.62759e+08	5.82588e+07	8.25	3.04	0.0463163
MG(16:0/0:0/0:0)[rac]	C19 H38 O4	330.277	22.583			8.27489e+06	8.28445e+06	3.25442e+07	369315	372862	3.82491e+07	4.69939e+07	6.76496e+07	1.08765e+08	8.45948e+07	8.175	3.03	0.0275232
	C24 H27 N4 O3 P3	512.129	7.989			129716	646643	479791	432572	372654	990874	4.14165e+06	4.80824e+06	1.21248e+06	3.53632e+06	8.175	3.03	0.00242107
Sch 38511	C22 H42 N2 O5	414.309	24.239			6.64902e+06	1.52026e+06	2.90729e+06	1.53909e+06	1.25742e+06	7.54354e+06	1.25243e+07	7.11215e+06	1.92161e+07	1.31573e+07	8.137	3.02	0.00337244
	C11 H32 N9 O6 P	417.221	4.877			5.17124e+06	1.36514e+06	741152	575575	323729	5.55923e+06	6.00483e+06	6.42559e+06	6.14977e+06	5.20438e+06	8.102	3.02	0.0196894
	C29 H70 N8 O2 P2	624.508	24.275			1.3889e+06	760134	1.52034e+06	784294	623645	6.83038e+06	6.27424e+06	5.64808e+06	1.37891e+07	5.95597e+06	8	3	3.19922e-05
	C28 H37 N7 O	487.305	22.415			2.42186e+06	1.06532e+06	1.90039e+06	604440	208933	8.51495e+06	8.97961e+06	4.18623e+06	1.44844e+07	7.35176e+06	7.993	3	0.00477157
Cyclo-[isoleucyl-prolyl-leucyl-alanyl]	C20 H34 N4 O4	394.258	9.497			3.4381e+06	1.42535e+06	4.2991e+06	1.18415e+06	575250	1.09797e+07	1.70528e+07	6.41822e+06	2.54831e+07	1.13888e+07	7.99	3	0.00256288
N-palmitoyl glycine	C18 H35 N O3	313.261	24.823			1.98521e+06	869553	795012	876195	431982	6.94333e+06	7.99259e+06	1.47401e+06	1.8593e+07	2.91958e+06	7.985	3	0.0102432
N-palmitoyl proline	C21 H39 N O3	353.293	26.306			5.14086e+06	5.34022e+06	3.84412e+06	7.49008e+06	8.82644e+06	4.25927e+07	3.1828e+07	5.00883e+07	8.05553e+07	9.27056e+06	7.976	3	0.00540574
N-Dodecylacrylamide	C15 H29 N O	239.225	9.849			1.81327e+06	2.21733e+06	7.63755e+06	963481	1.06753e+06	1.64255e+07	1.44316e+07	7.32494e+06	2.79136e+07	1.2228e+07	7.959	2.99	0.00311332
	C23 H32 N2 O S2	416.195	23.299			6.59758e+06	2.00222e+06	7.4774e+06	1.95898e+06	909785	1.59172e+07	1.76789e+07	1.1326e+07	2.03227e+07	1.51893e+07	7.95	2.99	0.0109114
	C23 H43 N6 O2 P	466.319	25.809			594946	396668	421962	422271	296634	4.16924e+06	2.66172e+06	3.35163e+06	1.02801e+07	844343	7.943	2.99	0.00574289
Mycestericin F	C21 H41 N O5	387.298	18.515			2.50419e+06	3.36189e+06	4.71988e+06	3.70832e+06	5.99628e+06	2.94046e+07	2.76217e+07	3.02662e+07	5.33315e+07	2.0848e+07	7.929	2.99	1.07633e-05
3,7-Dimethyl-2E,6E-decadien-1,10-dioic acid	C12 H18 O4	226.12	6.184			1.14605e+06	677909	825366	473129	899159	8.24206e+06	6.53146e+06	6.28074e+06	6.67709e+06	5.51691e+06	7.913	2.98	2.28339e-05
N-oleoyl threonine	C22 H41 N O4	383.303	25.645			847508	1.15823e+06	860605	1.18453e+06	1.45315e+06	9.13264e+06	7.50094e+06	1.28301e+07	1.79018e+07	3.8534e+06	7.885	2.98	0.000511521
	C24 H46 N5 O2 P	467.337	24.756			6.17462e+06	689103	5.97626e+06	2.90092e+06	1.0809e+06	2.27611e+07	1.14387e+07	3.15837e+07	8.52181e+07	1.36577e+07	7.846	2.97	0.00377518
NSC 622050	C16 H31 N O3	285.23	22.657			3.00347e+07	8.31089e+06	3.08868e+07	1.00553e+07	2.16495e+06	7.8876e+07	8.43473e+07	2.18795e+07	1.99258e+08	2.95648e+07	7.844	2.97	0.0277846
	C13 H30 N4 O5	322.223	15.652			2.79593e+06	3.61686e+06	4.55643e+06	2.31679e+06	1.88125e+06	2.19052e+07	2.76197e+07	1.53936e+07	2.64272e+07	1.48563e+07	7.835	2.97	1.42192e-05
Tetramethylpyrazine	C8 H12 N2	136.1	7.001	69.3		734101	881180	1.91696e+06	840105	1.1165e+06	6.86715e+06	7.20129e+06	5.33895e+06	1.72012e+07	3.74241e+06	7.793	2.96	0.000402502
	C22 H35 N7 O	413.289	18.478			1.25928e+07	3.82525e+06	6.22082e+06	2.64934e+06	614048	2.45275e+07	3.61979e+07	1.18206e+07	4.97582e+07	2.96955e+07	7.763	2.96	0.0108035
	C17 H38 N8 O2 S	418.283	23.471			1.03327e+07	3.53749e+06	6.55826e+06	2.52451e+06	692458	2.45857e+07	3.34456e+07	1.63522e+07	4.18883e+07	2.73056e+07	7.719	2.95	0.00803428
	C19 H33 N3 O2	335.257	7.798			4.79259e+06	583089	1.42765e+06	501413	677880	1.06412e+07	5.21786e+06	5.1106e+06	7.21952e+06	1.36412e+06	7.697	2.94	0.0234168
	C32 H33 N O S	479.227	5.94			2.02088e+06	419683	616236	1.0218e+06	146610	1.82404e+06	4.84258e+06	5.11851e+06	3.30508e+06	4.74219e+06	7.695	2.94	0.0106953
	C20 H38 N2 O4	370.283	24.477			2.01441e+06	596507	1.19411e+06	790192	364321	6.07681e+06	7.24285e+06	3.61551e+06	1.40422e+07	4.67106e+06	7.69	2.94	0.000729669
	C23 H36 N10 O4	516.29	5.835			5.18712e+06	1.8637e+06	714527	695872	182948	6.93521e+06	5.11811e+06	5.49489e+06	6.6119e+06	5.09694e+06	7.69	2.94	0.0324163
N-palmitoyl glutamine	C21 H40 N2 O4	384.298	23.258			2.94213e+07	1.10096e+07	1.90061e+07	6.42485e+06	1.36015e+06	7.56988e+07	1.02559e+08	4.77592e+07	1.34868e+08	8.46317e+07	7.687	2.94	0.0108352
	C18 H28 N6	328.236	11.312			1.64566e+06	878361	3.41541e+06	946227	675285	7.27128e+06	9.4651e+06	2.17866e+06	1.4963e+07	5.86641e+06	7.684	2.94	0.00486056
	C7 H19 N4 O9 P3	396.036	4.73			4.57248e+06	726544	258146	407333	446317	2.0395e+06	3.42848e+06	3.21217e+06	4.51576e+06	5.56986e+06	7.682	2.94	0.0275079
Dodecyl Isocyanate	C13 H25 N O	211.194	7.772			3.38598e+06	5.9064e+06	1.21737e+07	2.43774e+06	2.88165e+06	2.59811e+07	2.91461e+07	1.47936e+07	3.20401e+07	2.04679e+07	7.673	2.94	0.00243463
	C17 H43 N6 O5 P	442.304	21.781			3.90866e+06	1.69828e+06	2.68713e+06	388120	305044	1.18539e+07	1.83162e+07	7.60763e+06	2.29658e+07	1.30073e+07	7.659	2.94	0.00618554
	C16 H32 N4 O2	312.252	3.839			2.45051e+06	836756	1.88327e+06	641246	181029	6.30936e+06	8.77716e+06	3.26661e+06	6.37953e+06	6.62823e+06	7.624	2.93	0.0104052
N-stearoyl glycine	C20 H39 N O3	341.293	18.518			8.5367e+06	1.18733e+07	1.02021e+07	1.74642e+07	2.03674e+07	9.00364e+07	8.37337e+07	1.0172e+08	1.45647e+08	6.1314e+07	7.583	2.92	1.91835e-05
N-Methyl-N-dodecylnitrosamine	C13 H28 N2 O	228.22	7.772			6.25961e+06	1.03222e+07	2.14211e+07	4.13533e+06	4.20798e+06	4.74449e+07	5.00246e+07	2.495e+07	5.17184e+07	3.22008e+07	7.58	2.92	0.00332078
	C24 H35 N9 O14 P2	735.179	6.701			730670	546552	538583	623264	489736	3.97793e+06	5.18996e+06	2.7192e+06	4.72256e+06	4.14004e+06	7.575	2.92	2.12689e-06
Tridecanamide	C13 H27 N O	213.209	22.366			1.89421e+06	3.6434e+06	1.23796e+07	2.61264e+06	2.47849e+06	1.97779e+07	2.20333e+07	6.65814e+06	2.77056e+07	9.87299e+06	7.57	2.92	0.00967475
	C26 H54 N8 O4	542.429	21.532			3.51212e+06	1.03812e+06	4.24309e+06	775970	467919	7.85209e+06	1.43767e+07	5.60707e+06	2.39297e+07	7.23992e+06	7.564	2.92	0.00647716
	C19 H40 N8 O2	412.33	24.283			1.41711e+07	2.92914e+06	1.02292e+07	3.08692e+06	989225	2.7686e+07	2.31471e+07	1.00732e+07	3.13978e+07	2.33337e+07	7.559	2.92	0.0228312
	C20 H40 N7 O3 P	457.294	23.03			3.60597e+06	1.56403e+06	2.35147e+06	751648	164267	1.07856e+07	1.36633e+07	6.447e+06	1.88256e+07	1.17803e+07	7.532	2.91	0.00977429
	C38 H69 N4 O3 P	660.508	24.26			1.74144e+07	4.94944e+06	3.93078e+07	4.56056e+06	1.49234e+06	3.35381e+07	3.72647e+07	1.63599e+07	6.82106e+07	3.95273e+07	7.529	2.91	0.0497974
geranyl phosphate	C10 H19 O4 P	234.102	7.659			1.91596e+06	3.91258e+06	2.5068e+06	8.3393e+06	9.645e+06	2.94471e+07	2.02551e+07	4.49016e+07	1.12971e+07	3.73535e+07	7.526	2.91	0.00258463
NSC 622050	C16 H31 N O3	285.23	23.172			1.59658e+07	2.65843e+07	3.74594e+07	1.08152e+07	3.80279e+06	1.25424e+08	1.19821e+08	3.72546e+07	1.27032e+08	6.47374e+07	7.505	2.91	0.00739099
Pyrrolostatin	C15 H21 N O2	247.157	5.419			1.86738e+06	1.04913e+06	416138	1.29362e+06	222389	7.67308e+06	7.69551e+06	7.8231e+06	1.15069e+07	9.22896e+06	7.457	2.9	0.00276653
12-amino-dodecanoicacid	C12 H26 N2 O	214.205	6.383			970757	749222	1.59265e+06	403787	554289	5.56617e+06	6.56516e+06	4.14399e+06	9.06406e+06	3.9801e+06	7.429	2.89	0.000213088
1,2,3,4-Tetrahydro-8-methoxy-N,N-dipropyl-2-naphthalenamine	C17 H27 N O	261.209	22.772			4.86883e+06	1.75308e+06	1.0056e+07	925604	566746	1.40883e+07	1.30201e+07	9.4404e+06	1.67241e+07	4.2248e+06	7.427	2.89	0.036994
CB5775000	C28 H22 N2 O2	418.167	6.745			567499	363203	327796	340679	243714	2.25497e+06	4.41955e+06	998220	4.51601e+06	2.5081e+06	7.362	2.88	0.000741156
procyclidine	C19 H29 N O	287.225	24.005			382555	639700	1.26204e+06	3.70054e+06	3.34095e+06	9.25443e+06	9.94475e+06	3.80553e+06	1.38528e+07	3.90916e+06	7.333	2.87	0.0149462
	C15 H32 N2 O2	272.246	6.464			1.1542e+07	4.19184e+06	1.15777e+07	4.26502e+06	972209	2.16646e+07	3.14972e+07	2.11797e+07	3.56555e+07	3.12588e+07	7.329	2.87	0.015885
	C17 H33 N O3 S	331.218	24.23			3.17873e+06	1.13388e+06	2.12459e+06	405094	815996	7.24772e+06	6.86772e+06	8.30057e+06	1.00742e+07	8.67644e+06	7.321	2.87	0.00536256
	C17 H37 N3 O	299.294	6.803			3.52443e+06	2.77094e+06	8.70461e+06	2.2979e+06	1.73052e+06	1.96156e+07	1.86267e+07	2.01888e+07	7.00745e+07	2.07856e+07	7.286	2.87	0.000562961
	C16 H14 N6 O S	338.093	6.756			539462	479999	443372	472266	346741	1.32315e+06	3.64106e+06	5.08423e+06	3.44073e+06	910109	7.286	2.87	0.00612153
Lepistamide C	C17 H24 N2 O4	320.173	7.998			6.31522e+06	1.26891e+06	4.03992e+06	978115	219408	9.2341e+06	9.94267e+06	5.03354e+06	1.60395e+07	8.06434e+06	7.277	2.86	0.03434
LAPAO	C17 H36 N2 O2	300.277	7.047			1.66181e+06	994562	1.63868e+06	3.0952e+06	137999	9.36863e+06	1.18858e+07	5.26268e+06	2.02968e+07	1.28363e+07	7.253	2.86	0.00832248
Xestoaminol B	C14 H27 N O	225.209	23.172			1.73865e+07	2.98779e+07	3.99603e+07	1.15078e+07	5.60849e+06	1.33488e+08	1.25772e+08	4.04273e+07	1.33071e+08	6.98533e+07	7.234	2.85	0.00503767
N~2~-Tetradecanoyl-D-asparagine	C18 H34 N2 O4	342.252	17.236			5.63887e+06	1.99438e+06	3.6041e+06	1.07916e+06	467288	1.44225e+07	1.98498e+07	7.44395e+06	2.44284e+07	1.12312e+07	7.232	2.85	0.00624523
	C18 H44 N7 O3 P	437.325	22.748			4.8302e+06	2.00944e+06	1.61317e+06	2.56075e+06	2.95644e+06	1.32214e+07	1.92444e+07	1.85054e+07	2.82346e+07	9.27921e+06	7.227	2.85	0.000113613
	C17 H32 N2 O3	312.241	7.709			848912	1.02826e+06	1.8749e+06	912813	1.58747e+06	7.3532e+06	5.62011e+06	9.01771e+06	7.39708e+06	7.3945e+06	7.191	2.85	6.18785e-05
	C22 H29 N O3 P2	417.163	4.528			402926	687711	380623	692375	156426	2.87105e+06	2.89489e+06	1.54397e+06	5.78099e+06	4.2255e+06	7.185	2.84	0.000453652
	C24 H48 N3 O7 P	521.325	24.32			704362	343267	545414	368350	374315	2.51822e+06	2.26147e+06	2.68906e+06	6.33197e+06	2.73706e+06	7.184	2.84	5.29411e-05
	C7 H19 N6 O P3	296.083	4.732			2.18529e+06	817853	1.1444e+06	749645	267312	5.86693e+06	7.66563e+06	3.54684e+06	7.34142e+06	4.74534e+06	7.174	2.84	0.00298309
2S-amino-tridecanoic acid	C13 H27 N O2	229.204	13.953			971445	1.64282e+06	3.37134e+06	995861	1.36222e+06	9.7431e+06	1.07098e+07	3.11933e+06	1.52236e+07	3.06683e+06	7.152	2.84	0.00673727
1-Decyl-N,N-diethyl-3-piperidinecarboxamide	C20 H40 N2 O	324.314	14.611			327889	281564	344338	355609	322863	2.34192e+06	1.67528e+06	971852	1.35198e+07	2.89024e+06	7.142	2.84	0.0083383
N-oleoyl glycine	C20 H37 N O3	339.277	12.548			1.06216e+06	1.2572e+06	1.54174e+06	2.08374e+06	2.09614e+06	1.05853e+07	1.08817e+07	1.53448e+07	1.97846e+07	7.92958e+06	7.058	2.82	1.0864e-05
	C17 H42 N5 O2 P	379.308	26.063			2.01428e+06	1.5724e+06	1.64506e+06	1.42012e+06	1.5041e+06	1.31988e+07	1.05627e+07	1.10861e+07	3.22719e+07	4.26304e+06	7.05	2.82	0.00309788
	C20 H32 N6	356.267	21.454			3.22215e+07	1.21715e+07	3.39399e+07	5.9139e+06	1.98038e+06	7.64928e+07	1.73112e+08	5.48489e+07	1.98429e+08	8.57662e+07	7.046	2.82	0.00992303
2,4-dihydroxyheptadec-16-en-1-yl acetate	C19 H36 O4	350.243	23.782	97.9		1.76367e+07	2.7237e+07	6.62903e+07	1.10028e+07	6.64065e+06	1.04744e+08	1.23237e+08	1.51635e+08	1.91091e+08	1.24206e+08	7.042	2.82	0.00592109
	C15 H30 N4 O2	298.237	2.319			4.27154e+06	1.18566e+06	3.55753e+06	459480	298256	8.31296e+06	1.41272e+07	4.48128e+06	7.88388e+06	1.07017e+07	7.011	2.81	0.0177923
	C28 H36 N6 O4 S	552.251	7.363			632858	455415	1.51345e+06	846247	1.20272e+06	5.90922e+06	6.49213e+06	4.27098e+06	8.66558e+06	5.21673e+06	6.983	2.8	0.000185039
	C24 H38 N2 O5	434.278	20.346			7.81378e+06	2.87931e+06	3.50056e+06	1.54818e+06	518353	2.13439e+07	2.00745e+07	8.66554e+06	2.46299e+07	1.44329e+07	6.972	2.8	0.00852658
Neoenactin NL2	C20 H40 N2 O5	388.293	7.892			1.40031e+06	1.43975e+06	1.9033e+06	987411	234576	7.54785e+06	9.76078e+06	1.23422e+07	1.11582e+07	5.85885e+06	6.97	2.8	0.00239764
	C4 H15 N4 O2 P	182.093	6.912			573486	771185	430588	733825	848991	7.81174e+06	5.11092e+06	5.9747e+06	5.08027e+06	2.26749e+06	6.965	2.8	0.000102586
N-fumaryl-L-alanine dimethyl ester	C9 H13 N O5	215.079	4.486			3.94677e+06	5.80181e+06	5.68482e+06	2.83132e+06	2.42167e+06	4.92952e+07	3.52008e+07	2.2684e+07	2.7478e+07	2.30104e+07	6.962	2.8	2.51334e-05
N-palmitoyl glutamic acid	C21 H39 N O5	385.283	24.576			2.96213e+06	868438	1.25074e+06	1.33693e+06	928436	7.87047e+06	1.13099e+07	5.18514e+06	1.78406e+07	8.69916e+06	6.955	2.8	0.000182968
N-Dodecylacrylamide	C15 H29 N O	239.225	8.068			8.00721e+06	7.59216e+06	1.50611e+07	4.04156e+06	333956	5.49078e+07	5.2715e+07	2.89655e+07	7.22946e+07	4.25452e+07	6.943	2.8	0.0192398
	C22 H42 N4 O5	442.315	8.854			4.39522e+06	1.11722e+06	1.75204e+06	1.06023e+06	357963	7.74492e+06	1.08719e+07	4.62517e+06	1.71381e+07	7.19052e+06	6.932	2.79	0.00564299
9-mercaptodethiobiotin	C10 H18 N2 O3 S	246.104	5.428			2.32428e+07	5.551e+06	1.19693e+07	5.94754e+06	1.83774e+06	4.11528e+07	5.55267e+07	2.74354e+07	5.91167e+07	3.57275e+07	6.919	2.79	0.0107113
5-[6-Amino-2-(1-hexyn-1-yl)-9H-purin-9-yl]-N-ethyl-3,4-dihydroxytetrahydro-2-furancarboxamide	C18 H24 N6 O4	388.184	6.45			990882	1.77401e+06	1.15489e+06	523137	257642	4.72384e+06	7.52518e+06	1.04418e+07	6.84897e+06	4.75949e+06	6.912	2.79	0.00153915
	C27 H44 O11	544.286	5.082			9.32292e+06	1.24224e+06	1.12621e+06	656323	282456	8.34352e+06	7.74672e+06	3.85459e+06	8.34656e+06	3.96362e+06	6.879	2.78	0.0454205
	C14 H37 N8 O5 P3	490.21	6.74			5.3888e+06	1.00463e+06	863487	986924	327822	8.62492e+06	7.01141e+06	4.14126e+06	6.76804e+06	4.07287e+06	6.858	2.78	0.017162
	C22 H43 N3 O4	413.325	23.503			1.373e+06	280874	620996	825196	851263	5.30347e+06	8.48025e+06	5.65713e+06	1.39504e+07	4.83389e+06	6.856	2.78	0.000153058
	C22 H28 N6 O4	440.216	5.6			1.3049e+07	3.3535e+06	4.51248e+06	4.95882e+06	1.14485e+06	1.37601e+07	3.56125e+07	3.14332e+07	2.59712e+07	3.08034e+07	6.826	2.77	0.00592093
7-methyl-6E-hexadecenoic acid	C17 H32 O2	268.24	25.434			5.2923e+06	7.68857e+06	1.31849e+07	3.49855e+06	2.66312e+06	4.20343e+07	3.60833e+07	3.15484e+07	6.74864e+07	2.76985e+07	6.818	2.77	0.000818896
	C9 H23 N10 O3 P	350.169	4.456			8.04283e+06	2.23272e+06	2.9289e+06	3.02413e+06	1.57189e+06	1.49996e+07	1.99155e+07	1.37418e+07	2.19597e+07	2.84389e+07	6.8	2.77	0.00100427
2-hydroxy palmitic acid	C16 H32 O3	272.235	25.89			1.20414e+06	3.49016e+06	975760	635539	474103	1.21148e+07	1.11344e+07	6.61346e+06	6.63001e+06	3.51532e+06	6.795	2.76	0.002171
	C20 H40 N7 O4 P	473.289	21.62			3.7061e+06	1.85135e+06	3.06767e+06	1.00197e+06	300455	1.15033e+07	1.48388e+07	4.83449e+06	2.19303e+07	1.25561e+07	6.782	2.76	0.00623829
Cyclo-[isoleucyl-prolyl-leucyl-alanyl]	C20 H34 N4 O4	394.258	9.235			1.69382e+06	969645	2.65011e+06	521740	563627	5.97233e+06	9.27904e+06	4.30103e+06	1.09803e+07	6.57226e+06	6.778	2.76	0.00166811
N-Methyl-N-nitroso-1-tetradecanamine	C15 H32 N2 O	256.251	8.067			4.67107e+08	4.82669e+08	9.28923e+08	2.78445e+08	2.61159e+07	3.16922e+09	3.15843e+09	1.72931e+09	4.38521e+09	2.56778e+09	6.762	2.76	0.0170061
	C17 H34 N2 O	282.267	7.159			682364	564428	1.54923e+06	165819	109777	3.70945e+06	3.81691e+06	2.90018e+06	6.52225e+06	4.28654e+06	6.762	2.76	0.00711057
N-(3S,4S-methylene-decanoyl) histidine	C17 H27 N3 O3	321.205	7.628			1.00444e+06	1.54716e+06	2.94958e+06	1.28098e+06	1.50619e+06	1.01752e+07	1.16021e+07	6.17018e+06	3.22104e+07	8.81425e+06	6.756	2.76	0.000535325
	C16 H34 N8 O2 S	402.255	22.296			8.21516e+06	2.54785e+06	4.07963e+06	1.82698e+06	461758	1.71433e+07	2.39779e+07	1.14694e+07	2.66182e+07	1.55232e+07	6.729	2.75	0.0105775
	C17 H39 N2 O6 P	398.253	5.981			2.01565e+07	4.49596e+06	2.40175e+06	2.28587e+06	916014	1.61328e+07	2.06927e+07	1.10345e+07	2.00064e+07	1.5939e+07	6.717	2.75	0.0356703
	C28 H37 N7	471.309	24.314			583760	375371	883685	449079	379710	3.2766e+06	3.01179e+06	1.71376e+06	5.84451e+06	2.99206e+06	6.707	2.75	0.000109329
	C25 H34 N3 O5 P	487.222	7.047			1.76699e+06	549250	482867	232205	168693	3.23674e+06	4.06452e+06	2.18469e+06	4.36916e+06	2.54569e+06	6.703	2.74	0.00655638
Bacillamidin A	C17 H31 N O5	329.22	17.768			2.37057e+08	1.08584e+08	1.85035e+08	9.79181e+07	5.77122e+07	6.56627e+08	1.17289e+09	5.26747e+08	1.07398e+09	7.27584e+08	6.701	2.74	0.00045085
	C10 H26 N7 O3 P	323.184	4.156			3.04168e+06	2.75484e+06	3.09842e+06	1.87162e+06	1.55295e+06	1.76015e+07	2.58448e+07	1.84553e+07	2.05057e+07	1.51125e+07	6.699	2.74	5.8543e-06
	C17 H31 N O2 S	313.207	23.298			7.07096e+06	2.64519e+06	8.61549e+06	2.2394e+06	1.1137e+06	1.62446e+07	2.22169e+07	1.17481e+07	3.03194e+07	1.76399e+07	6.669	2.74	0.00730562
	C24 H34 N6	406.283	23.027			3.3976e+06	1.09727e+06	1.1697e+06	834384	623393	7.31305e+06	1.04806e+07	6.66658e+06	1.51438e+07	5.61417e+06	6.665	2.74	0.000762385
	C23 H47 N O2 P2	431.307	24.084			1.2808e+07	2.45327e+06	1.34519e+07	3.36278e+06	1.60127e+06	2.26825e+07	2.23735e+07	1.93079e+07	5.10215e+07	1.79349e+07	6.653	2.73	0.0153103
	C17 H36 N2 P2 S	362.206	24.342			915083	654215	606372	328925	499513	3.16252e+06	4.02991e+06	2.87238e+06	7.66638e+06	9.09536e+06	6.646	2.73	0.000124707
N-(3-hydroxy-dodecanoyl)-homoserine lactone	C16 H29 N O4	299.209	11.462			2.56352e+06	4.46392e+06	9.23728e+06	2.21431e+06	1.85725e+06	1.34027e+07	1.69714e+07	1.56786e+07	3.91966e+07	2.39788e+07	6.62	2.73	0.00141026
	C15 H30 N2 O2	270.231	6.655			1.91155e+06	1.43988e+06	2.5158e+06	1.27991e+06	858818	7.52101e+06	1.25016e+07	9.48807e+06	1.26479e+07	4.91964e+06	6.589	2.72	0.000111735
	C21 H36 N4 O5	424.268	9.024			2.28459e+06	1.15857e+06	1.84605e+06	635438	767668	6.91892e+06	9.99981e+06	4.69504e+06	1.48218e+07	7.62833e+06	6.584	2.72	0.000329871
	C17 H40 N5 O3 P S	425.26	21.8			5.70339e+06	1.95599e+06	2.60879e+06	1.47644e+06	1.30816e+06	1.283e+07	1.23551e+07	1.30916e+07	2.66465e+07	9.92697e+06	6.559	2.71	0.000669747
	C6 H20 N7 O6 P	317.122	3.892			976251	684617	887014	3.10034e+06	2.24129e+06	6.39195e+06	9.21574e+06	3.59275e+06	7.08444e+06	3.42885e+06	6.547	2.71	0.00472941
	C13 H11 N5 O3 S	317.057	4.219			1.8703e+06	2.20067e+06	1.24147e+06	955792	307484	8.1248e+06	7.54117e+06	5.44271e+06	2.55617e+07	1.05522e+07	6.545	2.71	0.00123398
	C17 H40 N5 O4 P	409.283	23.913			8.91231e+06	2.49297e+06	4.25304e+06	2.86669e+06	2.25097e+06	1.87531e+07	2.78717e+07	1.55924e+07	4.30018e+07	1.78012e+07	6.542	2.71	0.000483047
N-stearoyl dopamine	C26 H45 N O3	419.34	24.197			6.44808e+06	2.19887e+06	1.01401e+07	2.04948e+06	639990	1.56459e+07	1.43601e+07	8.73018e+06	3.3284e+07	9.07916e+06	6.531	2.71	0.0253431
	C20 H41 N6 O5 P	476.288	22.29			6.3978e+06	2.76034e+06	3.93258e+06	1.69053e+06	468945	1.69179e+07	2.65501e+07	1.31437e+07	3.25727e+07	1.79391e+07	6.499	2.7	0.00545489
	C14 H29 N O4 S	307.181	14.91			4.51073e+06	7.05458e+06	1.3891e+07	8.79519e+06	1.20054e+07	5.02164e+07	7.79563e+07	5.68737e+07	1.1385e+08	3.68159e+07	6.466	2.69	9.94093e-05
	C27 H21 N5 O2	447.171	24.278			5.81246e+06	1.70373e+06	1.09216e+07	1.06189e+06	815856	8.0419e+06	1.44552e+07	4.65376e+06	3.14692e+07	1.10051e+07	6.459	2.69	0.0384665
2-Isopropyl-3-(2-nitrobenzyl)-1,3-thiazolidin-4-one	C13 H16 N2 O3 S	280.088	6.106			1.69525e+07	4.10135e+06	5.28076e+06	3.42086e+06	916630	2.64529e+07	4.00816e+07	1.39145e+07	4.15698e+07	2.03886e+07	6.45	2.69	0.0125458
	C17 H34 N2 O2	298.262	7.454			1.07934e+06	1.13312e+06	1.38643e+06	406003	157804	6.95278e+06	7.03411e+06	5.55174e+06	7.00627e+06	3.40044e+06	6.442	2.69	0.00403263
		72.0582	25.882			1.81334e+06	4.48734e+06	1.22683e+06	1.25548e+06	574380	1.49851e+07	1.17679e+07	6.62405e+06	8.03682e+06	3.37078e+06	6.401	2.68	0.00461566
	C17 H41 N6 O2 P	392.303	14.121			1.73282e+06	713516	1.9381e+06	580301	868768	6.74707e+06	4.36867e+06	4.86804e+06	1.91789e+07	5.55882e+06	6.399	2.68	0.000795046
	C13 H25 O P S	260.137	2.007			1.44074e+06	1.32602e+06	1.21417e+06	2.49163e+06	2.40454e+06	1.141e+07	8.0543e+06	9.19088e+06	1.16121e+07	8.4555e+06	6.379	2.67	6.13842e-05
	C21 H34 N6 O S	418.25	19.91			6.37099e+06	2.21031e+06	3.14248e+06	972221	587186	1.40717e+07	1.85405e+07	8.13199e+06	2.02987e+07	1.27232e+07	6.366	2.67	0.0064684
		136.051	7.776			891037	2.27989e+06	2.5661e+06	3.20147e+06	2.49507e+06	1.58039e+07	2.34594e+07	1.38312e+07	6.09727e+07	1.42449e+07	6.334	2.66	0.000232633
LMFA08020333	C20 H37 N O4	355.272	23.884			2.42576e+06	1.3783e+06	3.05293e+06	1.02898e+06	1.07049e+06	8.22391e+06	8.72097e+06	7.55514e+06	1.44818e+07	1.11371e+07	6.327	2.66	0.00033516
LAPAO	C17 H36 N2 O2	300.278	7.158			1.01134e+07	9.41387e+06	2.32214e+07	3.20882e+06	217019	5.62053e+07	5.9514e+07	3.10108e+07	9.73743e+07	6.18497e+07	6.322	2.66	0.0317511
	C16 H38 N5 O3 P	379.272	23.398			6.00645e+06	3.06041e+06	4.45188e+06	2.7683e+06	3.44506e+06	1.96898e+07	2.17277e+07	2.48033e+07	3.86941e+07	1.85097e+07	6.307	2.66	1.20948e-05
Linoleoyl ethanolamide	C20 H37 N O2	323.282	18.548	99		7.52526e+06	9.52762e+06	8.21246e+06	9.4603e+06	1.21089e+07	8.26562e+07	5.21254e+07	5.96189e+07	9.23743e+07	3.858e+07	6.302	2.66	4.03054e-05
	C22 H39 N O3	365.293	26.083			517239	2.03564e+06	785504	769506	456766	8.99179e+06	4.84769e+06	3.66079e+06	9.70304e+06	1.38207e+06	6.3	2.66	0.00441525
	C4 H15 N4 O2 P	182.093	7.124			582138	776949	430591	728446	836675	8.20838e+06	4.58399e+06	4.46252e+06	5.44915e+06	1.88604e+06	6.293	2.65	0.000413918
	C19 H44 N7 O4 P	465.32	22.37			4.96877e+06	1.65325e+06	1.47846e+06	1.03939e+06	772700	9.25836e+06	1.02157e+07	8.07075e+06	1.67484e+07	7.67893e+06	6.262	2.65	0.0023466
N-oleoyl glycine	C20 H37 N O3	339.277	25.91			7.45649e+06	8.32205e+06	5.51222e+06	1.46079e+07	1.97419e+07	5.2089e+07	3.40545e+07	7.14949e+07	8.85592e+07	1.04292e+07	6.259	2.65	0.0164807
N-palmitoyl alanine	C19 H37 N O3	327.277	25.967			8.62964e+06	7.84074e+06	6.62462e+06	1.13165e+07	9.92813e+06	5.79159e+07	5.38951e+07	5.13742e+07	1.2776e+08	1.85791e+07	6.245	2.64	0.00305564
	C15 H19 N2 O3 P	306.114	5.474			1.43092e+06	1.805e+06	1.33923e+06	689780	692156	9.07747e+06	9.06647e+06	4.00582e+06	8.36254e+06	3.80033e+06	6.244	2.64	0.000257514
	C23 H42 N2 O3	394.319	16.023			3.87083e+06	1.42964e+06	4.25809e+06	1.34857e+06	1.33445e+06	1.13338e+07	6.06868e+06	8.2869e+06	3.54589e+07	8.91805e+06	6.238	2.64	0.00340588
	C23 H45 N6 O4 P	500.325	24.072			2.36809e+06	828491	860031	410326	306748	5.16315e+06	5.69047e+06	3.6428e+06	1.02975e+07	4.27432e+06	6.232	2.64	0.00246362
Pantheric Acid A	C22 H40 O3	352.298	25.066			1.20862e+06	791257	552772	958295	1.04925e+06	5.96977e+06	6.42874e+06	3.27395e+06	9.33701e+06	5.01124e+06	6.23	2.64	3.69293e-05
Surugapyrrole A	C9 H12 N2 O4	212.08	4.657			941561	1.12839e+06	1.05331e+06	1.11046e+06	3.08902e+06	1.41634e+07	1.29564e+07	5.23844e+06	6.89209e+06	6.35506e+06	6.206	2.63	0.000238547
	C24 H42 N2 O5	438.309	23.493			2.81273e+06	1.08801e+06	1.2707e+06	1.106e+06	991075	5.66627e+06	7.17783e+06	6.07368e+06	1.10576e+07	6.85247e+06	6.196	2.63	0.000176333
	C28 H40 N6 O	476.325	23.151			1.92667e+06	929934	1.96103e+06	739417	173123	5.1661e+06	7.24059e+06	3.14288e+06	9.24832e+06	5.75891e+06	6.193	2.63	0.00930947
	C8 H24 N7 O5 P	329.158	2.534			2.02061e+07	9.40431e+06	7.50905e+06	2.24e+06	695927	4.6454e+07	5.59204e+07	8.87754e+06	5.95742e+07	3.75139e+07	6.186	2.63	0.0243625
3097-B1	C15 H21 N O4	279.147	9.197			1.11563e+07	4.47845e+06	8.49622e+06	2.70072e+06	896637	2.49838e+07	3.34321e+07	2.2256e+07	4.96017e+07	2.76956e+07	6.184	2.63	0.0085001
	C20 H27 N7 O8	493.191	4.134			8.28352e+06	4.59293e+06	4.70878e+06	5.60705e+06	3.21792e+06	3.1382e+07	2.89828e+07	2.91144e+07	4.05929e+07	2.62669e+07	6.183	2.63	5.35694e-05
	C36 H56 N8 O12	792.402	5.425			1.12744e+06	2.20905e+06	453904	398249	200727	2.38906e+06	3.2887e+06	6.03913e+06	2.80532e+06	1.63896e+06	6.18	2.63	0.0166152
	C17 H43 N6 O5 P	442.304	21.96			9.30027e+06	3.86896e+06	5.41087e+06	2.19856e+06	286483	2.38942e+07	3.43791e+07	1.45026e+07	3.90424e+07	2.10856e+07	6.176	2.63	0.0172302
1-(6-{[3-Methoxyestra-1,3,5(10)-trien-17-yl]amino}hexyl)-1H-pyrrole-2,5-dione	C29 H40 N2 O3	464.304	25.066			1.24319e+06	572337	601410	639890	731900	4.2522e+06	3.53055e+06	3.93824e+06	1.20519e+07	1.82263e+06	6.155	2.62	0.00231925
18:2(5Z,9Z)(16Me)	C19 H34 O2	294.256	22.61			6.02055e+06	5.36551e+06	1.95024e+07	2.95801e+06	1.45553e+06	2.9428e+07	3.13798e+07	3.29954e+07	1.19033e+08	4.90566e+07	6.15	2.62	0.00357293
	C17 H33 N O3 S	331.218	23.297			4.75537e+08	1.98468e+08	5.77622e+08	1.73201e+08	9.23526e+07	1.17093e+09	1.42918e+09	8.38922e+08	2.11057e+09	1.22048e+09	6.15	2.62	0.00505313
	C16 H38 N5 O4 P	395.264	25.981			852924	712088	523694	1.05042e+06	782088	5.46004e+06	4.423e+06	4.80749e+06	1.06517e+07	1.67056e+06	6.147	2.62	0.00219255
	C22 H36 N6 O S	432.265	21.165			6.3295e+06	2.70527e+06	4.34125e+06	1.67103e+06	248630	1.66203e+07	2.22287e+07	1.06757e+07	2.61972e+07	1.37987e+07	6.144	2.62	0.0167409
N-(dodecanoyl)-homoserine lactone	C16 H29 N O3	283.215	23.296			1.44788e+07	5.6833e+06	1.72575e+07	4.72709e+06	2.52235e+06	3.4772e+07	4.42912e+07	2.41047e+07	6.32483e+07	3.48697e+07	6.135	2.62	0.00607803
	C20 H32 N6 S	388.239	21.324			1.11798e+07	4.77428e+06	9.25263e+06	3.11769e+06	858008	2.78139e+07	3.94097e+07	1.83835e+07	5.45611e+07	2.92451e+07	6.126	2.61	0.00857917
	C23 H38 N6 O	414.309	22.385			9.75756e+06	4.46371e+06	7.79673e+06	2.73891e+06	429288	2.68039e+07	3.50903e+07	1.64816e+07	4.87079e+07	2.71298e+07	6.078	2.6	0.0148448
N-(9Z-nonadecenoyl) taurine	C21 H41 N O4 S	403.275	24.033			6.11021e+06	1.87439e+06	3.9341e+06	1.43952e+06	1.01321e+06	1.2595e+07	1.13882e+07	1.13909e+07	3.19612e+07	1.1165e+07	6.077	2.6	0.00254929
	C19 H41 N6 O4 P	448.294	22.707			8.0802e+06	3.77701e+06	7.66466e+06	2.54569e+06	698963	1.89232e+07	2.52488e+07	1.50907e+07	3.86994e+07	2.2933e+07	6.072	2.6	0.0097934
alpha-N-(3-hydroxyoctadecanoyl)-L-ornithine	C23 H46 N2 O4	414.345	12.404			3.22418e+06	1.11912e+06	4.94763e+06	1.17883e+06	748176	7.15565e+06	5.5685e+06	4.44113e+06	2.07733e+07	7.46145e+06	6.07	2.6	0.0110508
N-[(Z)-hexadec-9-enoyl]glycine methyl ester (Z9-C16:1-NAGME)	C19 H35 N O3	325.261	24.772			1.66273e+07	6.54554e+06	1.08617e+07	7.47692e+06	8.43591e+06	5.1122e+07	5.41457e+07	4.88526e+07	9.18885e+07	3.66696e+07	6.06	2.6	5.26838e-05
	C6 H20 N7 O P S	269.12	4.876			2.25095e+06	1.667e+06	2.02083e+06	1.29831e+06	880825	1.00825e+07	1.15541e+07	3.52028e+06	1.8598e+07	3.29748e+06	6.048	2.6	0.00621416
	C21 H33 N5	355.272	19.714			1.18237e+07	9.344e+06	1.54479e+07	7.55642e+06	9.65131e+06	5.83024e+07	6.51422e+07	3.87998e+07	1.48008e+08	4.4853e+07	6.041	2.59	0.000481623
	C17 H31 N O2	281.235	21.631			3.0431e+06	1.43585e+06	2.80747e+06	593055	326642	7.56067e+06	1.39416e+07	4.71974e+06	1.84907e+07	8.6647e+06	6.035	2.59	0.00535776
N-(4-phenyl-3-oxo-tetranoyl)-homoserine lactone	C14 H15 N O4	261.1	7.817			3.84136e+06	996012	779851	2.31819e+06	659883	4.40931e+06	6.68543e+06	6.00939e+06	6.64479e+06	3.83934e+06	6.033	2.59	0.0123586
4E,6E,10Z-Hexadecatrien-1-ol	C16 H28 O	236.214	25.436			2.30258e+06	3.83433e+06	5.60207e+06	1.62561e+06	1.3446e+06	1.9821e+07	1.37785e+07	1.26027e+07	2.66637e+07	1.38514e+07	6.016	2.59	0.000739698
	C13 H36 N7 O4 P	385.257	15.769			1.4744e+07	3.7871e+06	5.30693e+06	1.84842e+06	765306	2.42528e+07	2.25825e+07	1.13123e+07	3.2833e+07	1.27441e+07	5.963	2.58	0.0209638
	C16 H30 N2 O5	330.215	10.94			4.02218e+06	1.8081e+06	1.956e+06	616260	537955	9.34268e+06	1.43371e+07	7.418e+06	1.6052e+07	1.07624e+07	5.952	2.57	0.00333059
N-palmitoyl phenylalanine	C25 H41 N O3	403.308	27.293			320062	434714	412441	462520	454287	3.79265e+06	2.17026e+06	2.58645e+06	1.07763e+07	1.00611e+06	5.95	2.57	0.0063893
NSC 622050	C16 H31 N O3	285.23	23.655			4.13548e+07	2.18041e+07	5.00699e+07	2.20166e+07	1.57076e+07	1.30975e+08	1.35351e+08	9.5425e+07	2.44775e+08	1.21166e+08	5.949	2.57	0.000451538
	C24 H26 N3 O3 P	435.171	23.793			1.05179e+06	436051	616824	630694	864876	3.74245e+06	3.73493e+06	3.7761e+06	9.8841e+06	2.14953e+06	5.934	2.57	0.000574356
	C18 H33 N7 O2	379.269	12.562			2.02541e+06	2.82838e+06	2.39277e+06	3.25866e+06	3.99942e+06	1.67213e+07	1.66886e+07	2.35633e+07	2.81473e+07	1.16871e+07	5.912	2.56	1.57315e-05
N-palmitoyl alanine	C19 H37 N O3	327.277	25.337			2.25754e+06	819059	1.3178e+06	1.03049e+06	326092	6.09102e+06	6.57006e+06	4.43234e+06	1.32501e+07	4.15853e+06	5.911	2.56	0.00176248
N,N'-1,3-Propanediylbis(2-propylpentanamide)	C19 H38 N2 O2	326.293	7.718			1.94055e+07	1.74354e+07	3.10476e+07	6.81833e+06	1.04434e+06	8.00606e+07	1.03006e+08	6.80081e+07	1.95086e+08	1.09183e+08	5.908	2.56	0.0140067
	C7 H24 N7 O3 P3	347.115	4.903			1.73226e+06	1.59088e+06	735682	844387	515196	3.38718e+06	4.98874e+06	7.05932e+06	5.09848e+06	2.16575e+06	5.908	2.56	0.00152941
Cyprodenate	C13 H25 N O2	227.188	12.559			1.12526e+07	2.79074e+07	2.39199e+07	2.27249e+07	2.80266e+07	1.43717e+08	1.41295e+08	7.67094e+07	1.91682e+08	7.83278e+07	5.907	2.56	0.000134692
	C16 H41 N7 O2 S	395.303	23.635			1.65034e+06	683050	2.43584e+06	1.22655e+06	501084	4.49699e+06	6.39953e+06	7.25151e+06	9.47631e+06	7.24322e+06	5.905	2.56	0.00168459
N-palmitoyl threonine	C20 H39 N O4	357.288	25.248			5.71244e+06	2.0729e+06	2.62922e+06	3.17944e+06	2.22466e+06	1.55169e+07	1.55288e+07	1.49598e+07	3.9176e+07	9.00492e+06	5.902	2.56	0.000526185
	C22 H38 N2 O4	394.283	23.27			1.98686e+06	2.96221e+06	3.51108e+06	1.73277e+06	1.90224e+06	9.12943e+06	9.12324e+06	1.5634e+07	2.00143e+07	1.17241e+07	5.901	2.56	4.1266e-05
	C22 H44 N2 O2	368.34	14.132			1.46945e+06	1.20707e+06	2.35375e+06	594299	283058	1.43685e+07	6.60331e+06	7.10456e+06	1.79453e+07	1.58957e+06	5.886	2.56	0.00693771
	C17 H43 N6 O3 P	410.314	12.122			3.2412e+06	3.59499e+06	7.96642e+06	2.97324e+06	3.04038e+06	1.84327e+07	1.9051e+07	1.49257e+07	3.86812e+07	2.49112e+07	5.878	2.56	0.000116101
L-Glutamic acid	C5 H9 N O4	147.053	17.778	94.1	C00025	8.05014e+06	3.52503e+06	6.553e+06	4.08886e+06	2.34708e+06	2.15336e+07	3.95326e+07	1.77427e+07	3.39102e+07	2.40267e+07	5.876	2.55	0.000289725
Linoleyl hydroxamic acid	C18 H33 N O2	295.251	23.265			7.12595e+06	3.35117e+06	5.46303e+06	2.49725e+06	2.26709e+06	1.69573e+07	2.41041e+07	1.1665e+07	3.02128e+07	1.96632e+07	5.868	2.55	0.000453235
	C19 H40 N2 O2	328.309	7.7			2.81616e+06	1.84324e+06	3.50477e+06	644720	134705	1.07772e+07	8.31993e+06	4.15129e+06	1.64188e+07	1.17933e+07	5.847	2.55	0.0195966
	C9 H20 Cl N7 O4	325.127	4.064			5.731e+06	1.86628e+06	1.50015e+06	1.22452e+06	434419	9.77319e+06	9.84086e+06	4.53623e+06	8.30145e+06	8.76523e+06	5.843	2.55	0.0134305
	C15 H28 N4 O5	344.206	5.478			6.36441e+06	1.35158e+06	696004	834249	377860	4.87294e+06	5.20896e+06	3.37033e+06	5.99241e+06	4.25807e+06	5.841	2.55	0.0401138
	C14 H30 N5 O2 P	331.215	22.183			3.91366e+06	3.20257e+06	6.70746e+06	1.92999e+06	2.43342e+06	2.10521e+07	1.86735e+07	1.67253e+07	4.19215e+07	1.84708e+07	5.831	2.54	0.000150311
	C11 H24 N8 O6 S	396.156	4.898			1.78445e+06	1.90683e+06	1.03434e+06	684758	640748	6.52618e+06	8.63457e+06	4.98088e+06	4.88956e+06	6.00062e+06	5.801	2.54	0.000676053
N-palmitoyl glycine	C18 H35 N O3	313.262	25.539			5.31589e+06	6.11448e+06	5.61045e+06	9.88323e+06	1.01404e+07	4.05439e+07	3.53707e+07	3.3444e+07	8.54586e+07	1.94955e+07	5.785	2.53	0.000668034
L-Histidine		155.039	6.028			2.23629e+06	1.01804e+06	751824	1.27322e+06	902333	5.88959e+06	9.17243e+06	4.66713e+06	1.06296e+07	5.18234e+06	5.785	2.53	0.000108785
18:2(5Z,9Z)(16Me)	C19 H34 O2	294.256	22.908			4.56139e+06	6.75189e+06	2.47338e+07	2.4276e+06	1.14848e+06	2.55827e+07	2.4948e+07	2.63676e+07	1.18161e+08	4.08224e+07	5.781	2.53	0.0108839
	C16 H37 N6 O3 P	392.267	22.465			2.37264e+06	1.35321e+06	1.66123e+06	705000	653666	7.81297e+06	1.0455e+07	6.11622e+06	1.6686e+07	5.21456e+06	5.774	2.53	0.000348049
	C16 H21 N4 O P S2	380.09	1.253			1.08657e+07	1.03191e+08	6.02028e+06	1.50295e+07	1.9415e+07	8.64945e+07	8.63304e+07	1.89542e+08	5.34215e+07	1.72614e+08	5.755	2.52	0.0168294
3-Pyridinylmethyl (12Z)-12-icosenoate	C26 H43 N O2	401.329	24.201			6.21176e+06	2.439e+06	9.54536e+06	1.52178e+06	669547	1.53047e+07	1.40341e+07	8.72791e+06	3.07323e+07	9.30724e+06	5.754	2.52	0.0225455
N-(dodecanoyl)-homoserine lactone	C16 H29 N O3	283.215	21.779			8.19216e+06	4.56652e+06	8.1523e+06	3.23653e+06	3.88166e+06	2.62451e+07	2.66614e+07	2.13152e+07	4.88692e+07	2.17999e+07	5.747	2.52	0.000171987
9-hydroxystreptazolin	C11 H13 N O4	223.084	2.016			1.46444e+07	1.30645e+07	1.12426e+07	6.41388e+06	8.6573e+06	1.46901e+07	7.49464e+07	6.45438e+07	1.05544e+08	1.75337e+07	5.741	2.52	0.0218139
	C19 H45 N6 O4 P	452.325	24.138			3.16782e+06	991202	1.38535e+06	1.01649e+06	985133	5.97638e+06	5.83439e+06	4.05e+06	1.00302e+07	4.60797e+06	5.74	2.52	0.000987708
Linoleyl hydroxamic acid	C18 H33 N O2	295.251	22.726			1.56061e+07	1.06341e+07	2.73303e+07	8.21553e+06	6.74121e+06	6.09882e+07	6.61472e+07	3.25563e+07	8.87727e+07	5.16483e+07	5.735	2.52	0.00126118
12-amino-dodecanoicacid	C12 H26 N2 O	214.205	6.822			3.80599e+06	4.47948e+06	3.72313e+06	2.01641e+06	564259	2.16599e+07	2.16248e+07	8.40605e+06	2.12729e+07	2.56518e+06	5.714	2.51	0.022772
	C9 H21 N6 O P	260.152	5.145			963458	607989	787339	235071	178595	3.67505e+06	4.82396e+06	908285	3.47122e+06	2.21601e+06	5.709	2.51	0.00450785
Austamide	C21 H21 N3 O3	363.158	6.954			1.27924e+06	400250	636155	239404	192221	2.2831e+06	2.79504e+06	1.25833e+06	3.67454e+06	1.74006e+06	5.704	2.51	0.00544448
	C20 H39 N3 O4	385.294	9.184			4.49591e+06	2.27372e+06	4.64694e+06	1.71895e+06	765554	9.81551e+06	1.29536e+07	7.10956e+06	1.87786e+07	1.3695e+07	5.697	2.51	0.00485251
entecavir	C12 H15 N5 O3	277.117	3.372			918275	1.31719e+07	1.90825e+07	8.29889e+06	3.38072e+07	8.1156e+07	8.2285e+07	7.49077e+07	5.14722e+07	5.52328e+07	5.687	2.51	0.0310515
18:2(5Z,9Z)(16Me)	C19 H34 O2	294.256	25.957			1.44904e+07	2.91537e+07	2.78102e+07	1.25374e+07	1.1367e+07	8.2909e+07	7.75942e+07	8.23169e+07	1.58659e+08	6.21111e+07	5.681	2.51	0.000292634
		69.0565	1.254			2.25886e+06	1.01587e+06	367016	1.58392e+06	1.86294e+06	5.72362e+06	1.15998e+07	1.65308e+07	8.99802e+06	3.75567e+06	5.681	2.51	0.0019234
N-Acetyl-3-[({(3R)-1-[3-(4-piperidinyl)propanoyl]-3-piperidinyl}carbonyl)amino]-L-alanine	C19 H32 N4 O5	396.237	4.062			1.41396e+07	5.81238e+06	8.50775e+06	3.2184e+06	762628	3.29886e+07	3.36619e+07	2.61469e+07	4.21518e+07	2.78097e+07	5.676	2.5	0.0160057
NP-020014	C15 H26 O3	276.173	24.326	67.8		1.69126e+06	1.40892e+06	1.59011e+06	1.12761e+06	1.28296e+06	7.98443e+06	9.3922e+06	6.50789e+06	1.21188e+07	4.58044e+06	5.667	2.5	0.000133085
Lepistamide C	C17 H24 N2 O4	320.173	7.834			4.05243e+06	941025	2.88022e+06	660998	156983	5.33255e+06	5.55866e+06	2.78411e+06	9.01669e+06	5.0957e+06	5.667	2.5	0.0459057
	C18 H44 N5 O3 P	409.319	24.226			1.65718e+07	9.02577e+06	2.00725e+07	1.28534e+07	1.07639e+07	4.5541e+07	6.01356e+07	7.2707e+07	1.06246e+08	7.7903e+07	5.657	2.5	3.53676e-05
	C25 H37 N3 O4	443.278	22.445			1.40518e+07	7.64128e+06	1.27547e+07	3.91413e+06	1.1003e+06	4.27855e+07	5.44765e+07	2.53265e+07	8.18955e+07	4.17929e+07	5.599	2.49	0.00808277
Thiomorpholine	C4 H9 N S	103.046	23.297			7.05857e+06	3.00069e+06	9.04074e+06	2.70361e+06	1.40881e+06	1.66327e+07	2.14387e+07	1.1718e+07	2.92117e+07	1.67088e+07	5.568	2.48	0.00622428
	C16 H45 N9 O2 P2	457.315	8.875			3.39149e+06	1.71388e+06	3.46606e+06	1.39095e+06	545707	9.53915e+06	1.27203e+07	5.00583e+06	1.43436e+07	9.07351e+06	5.566	2.48	0.00420786
N~2~,N~2~-Bis(carboxymethyl)-L-lysine	C10 H18 N2 O6	262.116	2.898			1.2492e+07	3.49249e+07	1.92378e+07	8.88246e+06	7.35261e+06	3.52394e+07	6.94957e+07	4.60036e+07	8.33453e+07	7.4551e+07	5.563	2.48	0.00382604
	C9 H16 N2 O3 S	232.088	4.483			1.05899e+07	2.80525e+06	3.63521e+06	2.70676e+06	847602	1.55387e+07	2.16262e+07	1.0378e+07	2.50597e+07	1.48549e+07	5.539	2.47	0.00998497
Sphingosine (d18:1)	C18 H37 N O2	321.264	22.842	96.8		7.64008e+06	2.61722e+06	7.49881e+06	4.14919e+06	3.65927e+06	3.54819e+07	2.2954e+07	2.0364e+07	2.75503e+07	1.76563e+07	5.532	2.47	0.000383694
1-Dodecyl-5-oxo-3-pyrrolidinecarboxylic acid	C17 H31 N O3	297.23	21.982			3.23664e+06	3.07542e+06	7.49284e+06	1.53124e+06	1.66066e+06	1.7087e+07	1.44966e+07	9.94273e+06	3.14248e+07	1.70067e+07	5.53	2.47	0.00134547
	C21 H34 N6 O	386.278	19.968			2.29952e+07	1.00114e+07	1.44953e+07	4.32353e+06	479587	5.22182e+07	7.24685e+07	2.9197e+07	9.58886e+07	5.53463e+07	5.528	2.47	0.0267031
	C19 H36 N2 O4 S	388.239	21.634			6.78751e+06	3.01413e+06	5.60496e+06	1.83128e+06	870038	1.66617e+07	2.55015e+07	1.19164e+07	2.93408e+07	1.6485e+07	5.528	2.47	0.00449421
	C16 H27 N7 O5	397.207	17.736			3.69317e+06	1.84928e+06	2.95305e+06	1.46996e+06	803592	9.80493e+06	1.63951e+07	7.71302e+06	1.45633e+07	1.0218e+07	5.525	2.47	0.00104376
	C27 H34 O S	406.232	5.185			4.08431e+06	986612	1.13493e+06	1.76687e+06	401911	3.35033e+06	7.89926e+06	6.95878e+06	6.01915e+06	6.26984e+06	5.524	2.47	0.0121646
Lophachinin D	C20 H26 O4	330.183	24.28			2.10555e+06	1.37949e+06	2.79315e+06	1.45933e+06	1.17573e+06	1.0463e+07	8.05292e+06	7.70279e+06	1.0218e+07	3.28844e+06	5.518	2.46	0.000680565
	C12 H34 N7 O9 P	451.216	4.159			8.49735e+06	1.55461e+06	1.88774e+06	2.16897e+06	452505	6.51926e+06	1.04147e+07	7.65878e+06	1.13421e+07	1.49491e+07	5.517	2.46	0.0218381
	C24 H43 N O3	393.324	23.85			9.53385e+06	3.44867e+06	7.70205e+06	2.98645e+06	2.44029e+06	1.90226e+07	1.7593e+07	1.7573e+07	4.68703e+07	2.25257e+07	5.516	2.46	0.00160555
N-oleoyl methionine	C23 H43 N O3 S	413.296	24.085			1.00247e+07	3.05982e+06	9.17623e+06	2.40893e+06	1.3783e+06	1.68652e+07	1.84854e+07	1.3872e+07	3.86768e+07	1.51059e+07	5.512	2.46	0.011154
	C24 H41 P S	392.265	22.365			2.30565e+07	7.87452e+06	1.02739e+07	2.16162e+06	758549	4.61873e+07	3.99534e+07	2.41559e+07	7.39998e+07	4.33792e+07	5.509	2.46	0.0210591
N-jasmonoyl-dopamine	C20 H27 N O4	345.194	10.587			1.6971e+06	2.09852e+06	2.16649e+06	2.78413e+06	2.52194e+06	1.18023e+07	1.56193e+07	6.73738e+06	1.60267e+07	1.19243e+07	5.504	2.46	6.75535e-05
	C26 H35 N7 O2	477.284	17.034			6.9527e+06	1.96017e+06	2.94224e+06	379662	199120	1.07478e+07	1.29726e+07	2.53256e+06	2.07093e+07	4.24466e+06	5.483	2.45	0.0489265
	C19 H34 N2 O4	354.252	7.79			1.37268e+06	1.96433e+06	4.65213e+06	1.90907e+06	2.20807e+06	9.40551e+06	1.07611e+07	8.09172e+06	1.37656e+07	1.07921e+07	5.478	2.45	0.000622978
	C22 H28 N3 O3 P	413.187	24.275			1.33087e+07	5.41663e+06	2.78657e+07	4.69297e+06	1.60938e+06	2.71732e+07	3.31319e+07	1.64205e+07	6.83196e+07	2.9594e+07	5.464	2.45	0.0317668
	C14 H38 N7 O5 P	415.268	14.82			2.04638e+07	5.92012e+06	7.89729e+06	4.07101e+06	1.22675e+06	3.23053e+07	3.87565e+07	1.6065e+07	6.37256e+07	2.81329e+07	5.457	2.45	0.0135351
	C16 H39 N6 O3 P	394.283	23.738			6.5574e+06	3.13355e+06	4.22901e+06	2.54282e+06	2.75474e+06	1.70601e+07	1.99271e+07	1.23883e+07	3.48028e+07	1.1065e+07	5.444	2.44	0.000385419
9-mercaptodethiobiotin	C10 H18 N2 O3 S	246.104	5.307			4.96052e+06	1.38064e+06	1.604e+06	951632	441744	7.49685e+06	9.9304e+06	6.21442e+06	1.02575e+07	6.06309e+06	5.43	2.44	0.00933122
N-Acetylleucylleucine	C14 H26 N2 O4	286.189	10.264			2.77801e+06	1.2776e+07	1.41104e+07	4.41222e+06	2.84811e+06	2.07839e+07	2.39486e+07	1.83865e+07	3.49127e+07	2.5941e+07	5.428	2.44	0.0131707
5-[6-Amino-2-(1-hexyn-1-yl)-9H-purin-9-yl]-N-ethyl-3,4-dihydroxytetrahydro-2-furancarboxamide	C18 H24 N6 O4	388.184	6.793			1.24397e+06	1.3062e+06	828728	302348	137058	4.49599e+06	4.46481e+06	6.24188e+06	7.35325e+06	3.35573e+06	5.425	2.44	0.00578604
	C20 H24 N4 O6	416.17	5.745			2.48572e+06	793991	616173	351936	123489	2.97535e+06	3.69915e+06	1.68409e+06	3.32766e+06	4.40022e+06	5.401	2.43	0.0225235
5-Oxo-L-prolyl-L-seryl-L-phenylalaninamide	C17 H22 N4 O5	362.159	5.32			993969	846635	438873	478664	182004	2.58311e+06	3.74357e+06	1.12128e+06	4.5214e+06	2.02398e+06	5.396	2.43	0.00346494
Lipoamide A	C15 H28 N2 O4	300.205	1.239			4.07964e+07	1.89503e+07	1.16451e+07	1.20786e+07	1.27267e+07	4.06933e+07	4.74155e+07	7.53112e+07	6.85481e+07	1.17106e+08	5.386	2.43	0.00236904
	C22 H36 N6 O	400.293	21.758			2.18243e+07	1.07462e+07	1.84783e+07	6.5167e+06	1.12997e+06	5.75922e+07	7.63002e+07	3.47336e+07	1.08213e+08	3.47838e+07	5.359	2.42	0.0173687
	C17 H29 N3 O2	307.226	6.97			6.03896e+06	672526	1.34315e+06	780873	1.41548e+06	1.24171e+07	7.19859e+06	5.12078e+06	7.55509e+06	1.59248e+06	5.359	2.42	0.0307175
NP-016087	C24 H30 O2	350.218	15.249	63.8		6.07321e+07	3.43702e+07	3.25905e+07	2.18094e+07	1.57636e+07	1.5641e+08	1.89595e+08	1.25921e+08	2.23949e+08	1.74185e+08	5.345	2.42	0.000644546
	C12 H27 N10 O5 P	422.19	3.825			1.42218e+07	4.22185e+06	6.29843e+06	4.57496e+06	778497	1.71574e+07	3.19716e+07	2.44338e+07	2.34003e+07	3.63059e+07	5.341	2.42	0.0166196
	C19 H39 N3 O2	341.304	7.884			1.28174e+06	957118	3.01466e+06	771024	502490	6.39427e+06	5.1043e+06	3.03035e+06	9.1803e+06	3.33176e+06	5.333	2.41	0.00387145
3,12-dihydroxy palmitic acid	C16 H32 O4	288.23	10.02			4.53444e+06	1.79348e+06	933260	2.50201e+06	2.39847e+06	1.52516e+07	1.27732e+07	1.06916e+07	1.49414e+07	9.53508e+06	5.326	2.41	0.00133851
1,4-dihydroxyheptadec-16-en-2-yl acetate	C19 H36 O4	310.251	23.774	71.1		3.21639e+07	4.23492e+07	1.06835e+08	2.06123e+07	1.45782e+07	1.57776e+08	1.71253e+08	2.15301e+08	3.34234e+08	1.70059e+08	5.324	2.41	0.0040617
p-coumaroyl-homoserine lactone	C13 H13 N O4	247.084	6.579			1.42273e+07	5.35254e+06	9.78916e+06	3.04678e+06	1.38275e+06	2.8466e+07	2.99882e+07	1.21323e+07	3.49321e+07	1.32927e+07	5.318	2.41	0.0201898
	C19 H44 N O P3 S	427.237	25.129			1.99231e+06	608178	563834	644936	695307	3.44547e+06	3.41955e+06	2.82411e+06	5.32442e+06	1.26579e+06	5.302	2.41	0.00411675
	C18 H39 N6 O4 P	434.278	22.041			1.03413e+07	6.29728e+06	8.67658e+06	3.5413e+06	495215	2.42681e+07	3.5125e+07	1.97962e+07	5.65518e+07	3.33137e+07	5.29	2.4	0.0168506
S-[2-(2-Pyridinyl)ethyl]cysteine	C10 H14 N2 O2 S	226.077	4.146			4.66489e+06	3.60483e+06	4.0121e+06	2.3979e+06	1.96838e+06	1.9041e+07	4.88291e+07	6.60768e+06	2.9875e+07	1.02361e+07	5.282	2.4	0.00541588
Palmitoleic acid	C16 H30 O2	254.224	25.889	65.9	C08362	2.16191e+06	3.06107e+06	1.38736e+06	1.67867e+06	846353	1.57322e+07	1.31308e+07	8.44498e+06	8.86591e+06	4.6459e+06	5.282	2.4	0.000448281
4-Vinylbenzyl diethylcarbamodithioate	C14 H19 N S2	265.095	6.578			1.44948e+07	5.28852e+06	8.56154e+06	2.99733e+06	1.29147e+06	2.79244e+07	2.87231e+07	1.13492e+07	3.3098e+07	1.23901e+07	5.28	2.4	0.0214849
idaverine	C24 H39 N3 O3	417.299	16.474			3.18007e+06	1.11059e+06	3.83071e+06	1.62044e+06	1.49411e+06	9.21312e+06	6.04009e+06	8.54265e+06	2.57857e+07	6.24352e+06	5.272	2.4	0.00240329
		171.052	3.693			7.74717e+06	3.65546e+06	3.93099e+06	3.16866e+06	3.93154e+06	2.07026e+07	2.38928e+07	9.44989e+06	2.49872e+07	1.18243e+07	5.267	2.4	0.000693048
	C23 H41 N O4 S	427.275	23.476			4.07539e+06	2.68436e+06	4.50209e+06	2.95831e+06	2.61886e+06	1.05523e+07	1.55508e+07	1.76072e+07	2.37507e+07	1.45504e+07	5.257	2.39	2.01608e-05
Lipoamide B	C16 H30 N2 O4	314.22	15.443			3.69728e+07	7.59073e+07	1.04999e+08	2.97625e+07	2.30616e+07	1.59942e+08	1.9396e+08	1.56524e+08	2.69602e+08	2.00196e+08	5.246	2.39	0.0054212
	C17 H37 N4 O2 P3	422.212	24.214			1.08825e+06	773818	1.52012e+06	759556	641046	6.38514e+06	4.04989e+06	6.27479e+06	3.87668e+06	3.87511e+06	5.234	2.39	4.16045e-05
	C21 H41 N3 O5	415.304	8.714			2.50061e+06	1.49647e+06	2.99486e+06	932519	247281	6.14185e+06	7.81736e+06	4.2826e+06	1.05097e+07	8.70895e+06	5.224	2.39	0.0133233
	C23 H36 N6 O2	428.288	20.388			6.87009e+06	4.2907e+06	4.52947e+06	1.49787e+06	533747	2.23964e+07	2.98217e+07	1.30575e+07	3.75994e+07	1.83409e+07	5.22	2.38	0.00644639
	C18 H34 N2 O5 S2	422.191	11.779			6.04108e+06	1.50184e+06	2.50902e+06	2.11236e+06	958467	8.7356e+06	1.27259e+07	3.43576e+06	1.92119e+07	1.1006e+07	5.21	2.38	0.00742949
	C18 H33 N3 O5	371.242	13.864			1.04766e+07	8.60298e+06	1.31419e+07	2.39767e+06	630850	3.20031e+07	4.78874e+07	1.68007e+07	5.76284e+07	4.47562e+07	5.202	2.38	0.0176946
	C15 H26 N4 O7	374.18	4.665			2.68662e+07	8.99925e+06	6.10359e+06	4.75209e+06	2.87934e+06	3.17317e+07	4.37974e+07	2.59662e+07	3.75626e+07	1.68303e+07	5.199	2.38	0.0161375
N-LAURYLSARCOSINE	C15 H31 N O2	257.235	20.302			6.57025e+06	7.75817e+06	1.6973e+07	5.31618e+06	6.29496e+06	3.90727e+07	3.4131e+07	1.19729e+07	5.04177e+07	1.17181e+07	5.195	2.38	0.0168121
	C20 H44 N5 O P	401.329	26.991			3.33974e+06	1.87682e+06	4.46782e+06	2.24833e+06	1.0178e+06	2.24724e+07	5.94761e+06	1.16314e+07	1.62294e+07	2.55401e+06	5.173	2.37	0.0207694
N-Acetylleucylleucine	C14 H26 N2 O4	286.189	7.585			3.1648e+06	952760	2.07224e+06	523483	148726	5.80821e+06	4.9272e+06	3.09083e+06	8.70476e+06	4.51496e+06	5.172	2.37	0.0272163
	C16 H37 N4 O3 P	364.259	26.212			2.49226e+06	5.18683e+06	2.23843e+06	2.2225e+06	1.96941e+06	1.156e+07	9.23001e+06	1.35822e+07	1.37285e+07	2.63505e+06	5.164	2.37	0.0135595
N-(3-oxododecanoyl) homoserine lactone	C16 H27 N O4	297.194	15.437			5.04039e+06	1.02546e+07	1.40074e+07	3.56876e+06	3.13869e+06	2.08013e+07	2.60126e+07	2.0249e+07	3.61645e+07	2.6828e+07	5.161	2.37	0.00581797
7-Hydroxy-6-methyl-8-(1-D-ribityl)lumazine	C12 H16 N4 O7	328.102	3.913			1.83674e+06	1.93285e+06	1.3715e+06	1.9423e+06	1.51559e+06	8.5575e+06	1.1634e+07	6.04494e+06	1.07959e+07	9.4512e+06	5.146	2.36	7.47138e-06
decanamide	C10 H21 N O	171.162	14.421			2.07798e+08	1.75675e+08	3.69786e+08	2.41164e+08	2.09142e+08	1.07324e+09	1.12282e+09	5.46771e+08	1.13796e+09	5.08302e+08	5.132	2.36	0.000708417
octadec-9-ynoic acid	C18 H32 O2	262.23	22.61	88.9		5.92536e+06	5.31056e+06	1.78933e+07	3.63942e+06	1.79141e+06	2.44211e+07	2.65495e+07	2.72414e+07	9.84565e+07	4.20555e+07	5.13	2.36	0.00324727
trans-3-Indoleacrylic acid	C11 H9 N O2	187.063	22.436	93.7		2.74185e+06	1.54606e+06	2.29881e+06	599407	348356	7.84983e+06	9.48892e+06	4.26469e+06	1.48537e+07	7.2408e+06	5.077	2.34	0.00491994
Laurolactam	C12 H23 N O	197.178	6.82			785072	786234	671682	377465	132444	3.58543e+06	3.67828e+06	1.54115e+06	3.40927e+06	493084	5.076	2.34	0.021226
	C23 H46 N2 O2	382.356	14.745			9.82647e+06	5.71253e+06	1.5516e+07	2.69446e+06	526078	4.46243e+07	2.89996e+07	2.51569e+07	1.0489e+08	2.43307e+07	5.076	2.34	0.0159363
	C12 H32 N5 O2 P	309.23	23.095			1.7841e+06	1.44988e+06	2.83642e+06	1.15015e+06	1.94231e+06	9.04022e+06	9.94896e+06	7.99153e+06	1.9139e+07	6.30547e+06	5.067	2.34	0.000117402
	C19 H35 N8 O4 P3	532.201	5.14			2.75545e+06	1.28594e+06	899446	1.01708e+06	628447	5.12071e+06	6.91033e+06	3.7019e+06	1.16873e+07	3.12762e+06	5.035	2.33	0.00185869
MFCD01176190	C19 H15 N O2	289.109	4.234			2.17873e+06	690466	1.39873e+06	538640	199104	3.26173e+06	4.61154e+06	2.22586e+06	4.89142e+06	3.47227e+06	5.029	2.33	0.0160611
N,N'-1,2-Ethanediylbis(2-propylpentanamide)	C18 H36 N2 O2	312.278	7.574			3.93476e+06	4.46916e+06	4.41712e+06	2.12877e+06	612288	1.97855e+07	2.7758e+07	1.71231e+07	2.95096e+07	5.50022e+06	5.028	2.33	0.00456166
	C19 H40 N2 O2	328.309	7.876			1.90402e+06	1.18411e+06	2.71648e+06	329884	109123	5.95321e+06	5.24123e+06	2.72007e+06	1.42458e+07	8.93746e+06	5.028	2.33	0.0183044
	C17 H39 N6 O3 P	406.283	21.645			1.55372e+07	7.79201e+06	6.76736e+06	7.42048e+06	8.18048e+06	3.51826e+07	3.9105e+07	4.61111e+07	7.43829e+07	3.54348e+07	5.019	2.33	4.56305e-05
		153.024	4.189			1.51435e+07	2.64899e+06	3.05704e+06	4.90672e+06	1.75543e+06	1.53264e+07	2.09416e+07	7.31387e+06	2.81678e+07	1.41533e+07	5.013	2.33	0.0177876
		121.018	7.371			3.53042e+06	1.68375e+06	1.84726e+06	2.91227e+06	1.59317e+06	1.21443e+07	9.26018e+06	5.5862e+06	1.34299e+07	6.21383e+06	5.013	2.33	0.000391389
Commendamide	C18 H35 N O4	329.256	23.175			7.51568e+06	3.58364e+06	7.83052e+06	3.22718e+06	1.7482e+06	1.59991e+07	2.09928e+07	1.56932e+07	2.81865e+07	1.78951e+07	4.994	2.32	0.00342596
NP-004038	C16 H24 O3	281.199	11.468	63.2		1.43247e+06	1.78407e+06	4.23713e+06	1.18309e+06	881225	4.50938e+06	7.66055e+06	6.28489e+06	1.29315e+07	7.14529e+06	4.988	2.32	0.00229204
	C17 H34 N2 O2	298.262	7.093			2.03708e+07	1.62066e+07	1.82835e+07	6.45396e+06	1.94082e+06	7.61287e+07	1.14394e+08	8.0765e+07	1.15557e+08	4.62887e+07	4.983	2.32	0.00582151
Glioperazine C	C15 H17 N3 O3	287.127	5.302			1.84246e+06	1.36891e+06	3.49033e+06	736800	330676	6.79065e+06	6.80539e+06	2.38916e+06	9.90965e+06	2.89678e+06	4.961	2.31	0.0197787
	C17 H32 N2 O8	392.216	4.523			6.74538e+06	1.33111e+06	1.68603e+06	2.17205e+06	473460	3.86195e+06	8.97391e+06	8.36283e+06	6.62266e+06	1.25686e+07	4.96	2.31	0.0223541
Thiolactone B2	C6 H9 N O2 S	159.035	1.463			9.18419e+06	3.62157e+07	1.98786e+07	9.05205e+06	2.24668e+06	4.80146e+07	4.53728e+07	1.5952e+07	7.0581e+07	4.37787e+07	4.94	2.3	0.0441489
N-Methyl-N-dodecylnitrosamine	C13 H28 N2 O	228.22	7.011			3.82306e+07	2.5983e+07	4.09285e+07	1.26712e+07	1.90319e+06	1.28345e+08	1.39553e+08	7.17177e+07	1.78433e+08	9.79742e+07	4.94	2.3	0.0217911
	C17 H34 N2 O3	314.257	6.886			2.25068e+06	2.10135e+06	1.37438e+06	534469	93159.6	7.60052e+06	7.2804e+06	6.78979e+06	6.3327e+06	3.53189e+06	4.94	2.3	0.0249655
	C22 H44 N P S	385.294	9.008			1.61189e+06	1.17654e+06	2.78304e+06	723576	165792	5.28543e+06	7.51348e+06	3.3996e+06	8.59342e+06	5.81062e+06	4.939	2.3	0.0150554
	C17 H41 N6 O3 P	408.298	24.191			2.48327e+07	7.74221e+06	8.6802e+06	4.98459e+06	3.0389e+06	3.81409e+07	4.1744e+07	2.93671e+07	5.60328e+07	2.87931e+07	4.926	2.3	0.00762721
PGF2alpha dimethyl amide	C22 H39 N O4	381.288	21.556			3.72231e+06	6.57879e+06	1.2056e+07	4.42627e+06	2.52563e+06	2.17808e+07	2.61167e+07	1.83203e+07	5.06004e+07	2.00507e+07	4.921	2.3	0.00151091
Commendamide	C18 H35 N O4	329.256	17.221			2.00453e+06	2.01469e+06	5.3041e+06	874307	586362	1.05931e+07	9.86409e+06	6.6774e+06	1.89077e+07	7.91295e+06	4.921	2.3	0.00553283
	C19 H30 N6 O4	406.232	5.04			6.28694e+06	1.17842e+06	2.02253e+06	2.25262e+06	293594	4.81814e+06	1.27791e+07	9.95274e+06	8.49211e+06	1.26048e+07	4.921	2.3	0.0212194
1-Dodecyl-5-oxo-3-pyrrolidinecarboxylic acid	C17 H31 N O3	297.23	22.703			3.53421e+06	1.6409e+06	2.86344e+06	1.02311e+06	1.41571e+06	8.07346e+06	8.89904e+06	6.90392e+06	1.60255e+07	6.66228e+06	4.92	2.3	0.000822094
	C24 H32 N6 O	420.262	19.011			1.32177e+07	6.55548e+06	1.13669e+07	3.89952e+06	1.28173e+06	3.22217e+07	4.81658e+07	1.84476e+07	6.86843e+07	3.19641e+07	4.915	2.3	0.00729473
	C22 H44 N5 O3 P	457.316	16.818			496177	462949	988493	427090	440615	1.31608e+06	2.79313e+06	1.30914e+06	1.38979e+07	2.26847e+06	4.9	2.29	0.0162636
		499.264	4.878			2.11248e+06	1.29332e+06	636169	593648	369646	6.91539e+06	2.4776e+06	3.10931e+06	3.37101e+06	1.94831e+06	4.888	2.29	0.00811209
N~2~-(Carboxymethyl)arginine	C8 H16 N4 O4	232.117	1.156			2.24083e+06	2.09542e+06	1.03711e+06	1.08511e+06	914900	3.9341e+06	7.68823e+06	5.29809e+06	7.48403e+06	5.04253e+06	4.883	2.29	0.000424571
	C4 H8 N9 O P S	261.031	4.275			2.90506e+06	626188	850131	1.54573e+06	871136	2.52333e+06	5.90186e+06	4.22315e+06	4.05535e+06	9.17167e+06	4.848	2.28	0.00410563
	C22 H36 N6 O	400.293	21.243			1.1872e+07	5.43347e+06	7.56767e+06	2.70342e+06	255752	2.46275e+07	3.65346e+07	1.7673e+07	4.795e+07	2.62889e+07	4.838	2.27	0.0292259
6-(3'-methylbuten-2'-yl) isatin	C13 H13 N O2	215.095	7.814			5.98225e+06	1.6609e+06	977862	3.66918e+06	1.07659e+06	5.48761e+06	9.11001e+06	8.02694e+06	9.01617e+06	5.87962e+06	4.833	2.27	0.0204389
	C17 H22 N5 O3 P	375.146	4.918			3.97101e+06	1.76778e+06	814894	820038	387445	3.95807e+06	4.33118e+06	2.95461e+06	4.03316e+06	2.69146e+06	4.827	2.27	0.042915
	C19 H42 N5 O3 P	419.304	23.026			1.46714e+06	926128	4.04118e+06	543232	162840	5.32721e+06	4.4612e+06	3.24299e+06	9.92078e+06	4.11799e+06	4.817	2.27	0.0266676
	C21 H33 O4 P3	442.158	4.19			2.81526e+06	610857	2.00556e+06	961255	252498	2.21686e+06	4.83836e+06	4.65032e+06	4.15284e+06	4.62994e+06	4.817	2.27	0.0272998
	C21 H33 N7 O2	415.268	13.81			4.03706e+06	2.64344e+06	1.59204e+06	1.36785e+06	630873	7.37015e+06	9.92491e+06	6.56189e+06	1.30787e+07	7.65916e+06	4.811	2.27	0.00441166
Periconiasin J	C21 H31 N O2	329.235	23.043			2.58643e+06	1.57389e+06	3.70999e+06	862285	264995	7.50033e+06	9.74267e+06	4.8721e+06	1.29696e+07	7.56774e+06	4.808	2.27	0.0134459
	C22 H41 N7 O2	435.332	24.788			9.7592e+06	1.88877e+06	4.22491e+06	2.06113e+06	840381	1.26113e+07	9.83854e+06	9.37888e+06	3.39988e+07	9.06231e+06	4.773	2.26	0.0149784
	C17 H22 O11	402.116	4.209			2.08513e+06	865077	1.07057e+06	1.36821e+06	764629	5.10762e+06	4.69518e+06	3.43065e+06	5.42118e+06	5.55848e+06	4.771	2.25	0.00043043
2-(1,4-Diazepan-1-yl)-1-(2-ethoxyethyl)-1H-benzimidazole	C16 H24 N4 O	288.195	4.155			3.07938e+06	2.81803e+06	3.67368e+06	1.95674e+06	1.64225e+06	1.3419e+07	1.68765e+07	8.0687e+06	1.39788e+07	8.40097e+06	4.762	2.25	8.2787e-05
	C10 H30 N6 O7 P2	408.164	5.035			4.61192e+06	1.68139e+06	971897	1.17288e+06	268306	5.76881e+06	5.57269e+06	3.36164e+06	6.11691e+06	2.78027e+06	4.751	2.25	0.0412977
N-myristoyl glutamine	C19 H36 N2 O4	356.267	20.908			2.28954e+07	1.09419e+07	1.14596e+07	5.69037e+06	3.54475e+06	5.09386e+07	5.69813e+07	4.06312e+07	6.81124e+07	5.18901e+07	4.742	2.25	0.00400043
		138.042	1.244			3.57453e+06	1.39415e+07	5.77304e+07	8.59293e+06	6.41553e+06	4.67672e+07	4.07474e+07	3.65758e+07	6.07509e+07	3.10626e+07	4.742	2.25	0.0440897
	C17 H35 N9 P2 S2	491.195	25.259			1.75153e+06	710069	404531	792786	910238	4.08241e+06	3.62296e+06	3.75939e+06	6.76014e+06	1.12111e+06	4.742	2.25	0.00628766
	C28 H39 N5	445.319	23.818			1.33713e+07	3.63976e+06	9.43026e+06	4.00752e+06	2.34281e+06	1.89933e+07	1.52939e+07	1.57386e+07	5.27498e+07	1.95575e+07	4.739	2.24	0.00895453
Preussin H	C21 H35 N O2	333.267	24.223			4.74428e+06	1.71926e+06	2.46612e+06	727476	604873	8.13318e+06	9.27959e+06	5.79285e+06	1.20521e+07	5.92245e+06	4.731	2.24	0.0101034
Dichotomocej B	C14 H25 N O2	239.188	16.66			1.2396e+07	6.66307e+06	1.16098e+07	5.00586e+06	3.20931e+06	3.14731e+07	4.5431e+07	1.85498e+07	5.62044e+07	2.6857e+07	4.724	2.24	0.00145956
Cis-7-tetradecenoyl-D-asparagine	C18 H32 N2 O4	340.236	16.172			1.90846e+07	8.71476e+06	1.39621e+07	5.00534e+06	2.14834e+06	3.43788e+07	5.12557e+07	2.29848e+07	6.21958e+07	4.11704e+07	4.724	2.24	0.00914591
	C9 H22 N5 O3 P	279.147	8.618			6.82803e+06	1.7352e+06	4.38926e+06	1.67465e+06	797754	7.01235e+06	8.18254e+06	1.61963e+07	1.2759e+07	5.847e+06	4.716	2.24	0.0181202
Sarmentosin	C11 H17 N O7	275.1	4.241			1.502e+07	1.68475e+07	1.00263e+07	1.22311e+07	7.32706e+06	5.76384e+07	7.07129e+07	4.87029e+07	6.70664e+07	5.68402e+07	4.712	2.24	9.59557e-05
	C19 H35 N7 O2	393.285	23.037			6.30411e+06	1.63237e+06	3.16493e+06	1.66514e+06	1.11445e+06	7.84198e+06	1.1838e+07	6.13744e+06	1.85863e+07	6.79642e+06	4.709	2.24	0.00628009
	C18 H35 N7 O	365.29	21.689			1.6216e+07	2.37839e+07	2.04415e+07	1.55979e+07	1.35646e+07	1.08563e+08	7.6332e+07	7.52274e+07	1.17463e+08	4.62324e+07	4.707	2.23	0.000137623
GPK	C13 H24 N4 O4	322.164	4.827	61.7		2.63807e+06	1.35614e+06	873887	1.31799e+06	1.12461e+06	4.42079e+06	7.76133e+06	6.19964e+06	7.81881e+06	3.42428e+06	4.704	2.23	0.000421251
	C13 H32 N7 O11 P	493.191	3.923			3.275e+06	2.34126e+06	2.3666e+06	2.11527e+06	1.35628e+06	1.12616e+07	9.62889e+06	1.14742e+07	1.10124e+07	9.49174e+06	4.704	2.23	0.000198228
	C20 H31 N7 O	385.257	13.85			6.9708e+06	3.74019e+06	4.71117e+06	1.75379e+06	586631	1.36569e+07	2.28829e+07	1.05856e+07	2.33184e+07	1.75803e+07	4.7	2.23	0.0104575
Nitrosoxacin A	C16 H34 N2 O2	286.262	7.036			2.52584e+06	2.86236e+06	3.14743e+06	1.06895e+06	126952	1.18392e+07	1.45709e+07	8.64446e+06	1.53566e+07	2.87023e+06	4.687	2.23	0.0261736
LAPAO	C17 H36 N2 O2	300.277	6.964			1.24416e+07	8.67604e+06	1.43821e+07	3.31995e+06	405028	4.05703e+07	3.81009e+07	2.43732e+07	5.87066e+07	6.47965e+07	4.676	2.23	0.0255888
PGE2alpha dimethyl amine	C22 H41 N O3	367.308	22.959			1.96671e+06	1.4193e+06	4.64163e+06	608206	294519	6.76794e+06	6.02323e+06	4.41988e+06	1.08448e+07	6.63183e+06	4.673	2.22	0.019589
N~2~-Tetradecanoyl-D-asparagine	C18 H34 N2 O4	342.251	22.031			3.29674e+06	1.95331e+06	3.14559e+06	976431	293333	9.12336e+06	1.34829e+07	5.27624e+06	1.71284e+07	8.00768e+06	4.671	2.22	0.00929164
	C20 H31 N7 O2	401.252	13.91			1.13386e+07	4.1883e+06	5.63837e+06	2.61864e+06	736119	1.95654e+07	2.75596e+07	1.08716e+07	3.467e+07	1.7336e+07	4.671	2.22	0.0140853
Nitrosobis(2-oxopropyl)amine	C6 H10 N2 O3	158.069	14.894			4.8346e+06	2.02824e+06	2.37248e+06	2.01741e+06	1.62228e+06	9.47062e+06	1.58377e+07	7.78871e+06	1.76777e+07	8.51408e+06	4.669	2.22	0.000285264
N-oleoyl isoleucine	C24 H45 N O3	395.34	24.796			1.33607e+07	3.42676e+06	7.98902e+06	3.45414e+06	1.45481e+06	1.86678e+07	1.61116e+07	1.46237e+07	4.84969e+07	1.50381e+07	4.664	2.22	0.0135824
	C13 H29 N8 O5 P	408.2	5.298			6.91314e+06	2.83376e+06	1.64952e+06	2.1001e+06	1.15752e+06	1.12009e+07	9.7913e+06	6.94194e+06	1.27572e+07	7.06534e+06	4.662	2.22	0.00801059
Octahydro-1,2,8-indolizinetriol	C8 H15 N O3	173.105	6.269			8.86412e+06	5.45386e+06	1.15885e+07	3.22242e+06	2.06348e+06	2.59938e+07	2.53985e+07	1.3465e+07	4.48473e+07	2.11507e+07	4.657	2.22	0.00481245
Lipoamide B	C16 H30 N2 O4	314.22	1.248			1.34486e+07	6.33547e+06	5.12336e+06	2.58126e+06	7.29292e+06	2.48449e+07	2.54335e+07	3.63867e+07	2.94506e+07	3.50858e+07	4.649	2.22	0.00280367
	C18 H34 N2 O8	406.231	5.292			1.65498e+07	3.83278e+06	5.41552e+06	6.34844e+06	1.38264e+06	1.64202e+07	3.59199e+07	2.51633e+07	2.48155e+07	3.41831e+07	4.647	2.22	0.0113072
Ethyltrimethylpyrazine	C9 H14 N2	150.116	4.514			7.54081e+06	4.80445e+06	6.19511e+06	4.33941e+06	2.69009e+06	2.23146e+07	4.03105e+07	2.05502e+07	3.73432e+07	1.59362e+07	4.645	2.22	0.000159323
	C12 H28 N8 O7 S	428.179	4.175			4.09136e+06	1.14838e+06	2.53212e+06	995055	206638	3.37373e+06	5.89681e+06	4.42555e+06	5.33424e+06	6.29402e+06	4.645	2.22	0.0479556
	C14 H38 N7 O4 P	399.273	15.103			2.34561e+07	1.13e+07	9.85582e+06	4.78355e+06	1.53063e+06	4.57707e+07	5.98379e+07	2.76913e+07	5.13984e+07	3.45014e+07	4.644	2.22	0.0159198
Kaempferol-3-Galactoside	C15 H22 N6	286.189	7.477			3.89093e+06	1.32221e+06	3.19507e+06	942908	396151	5.71292e+06	6.47332e+06	3.88295e+06	9.13868e+06	6.1386e+06	4.643	2.21	0.0231264
Oleoyl ethanolamide	C20 H39 N O2	371.303	23.033	61.5		2.88041e+07	8.39632e+06	1.93821e+07	8.03324e+06	5.86334e+06	3.88246e+07	4.64528e+07	3.28161e+07	8.62054e+07	3.02783e+07	4.624	2.21	0.00815821
	C8 H15 P S	174.063	1.215			1.13212e+07	3.11484e+07	4.04263e+07	8.48665e+06	6.58242e+06	5.23424e+07	5.32623e+07	3.90108e+07	6.38838e+07	2.98944e+07	4.623	2.21	0.0333737
	C17 H38 N5 O3 P	391.272	23.827			4.02493e+06	2.04997e+06	5.12748e+06	2.14591e+06	956815	8.92755e+06	1.02994e+07	4.0091e+06	1.60428e+07	9.89161e+06	4.61	2.2	0.00872289
	C20 H28 N8 O5	460.217	5.849			2.11307e+07	9.77244e+06	6.96673e+06	6.02536e+06	2.22789e+06	3.20947e+07	3.34786e+07	2.4382e+07	4.48097e+07	2.38509e+07	4.607	2.2	0.0135801
Linoleyl hydroxamic acid	C18 H33 N O2	295.251	24.252			4.13367e+07	1.69138e+07	6.59789e+07	1.69898e+07	9.51727e+06	7.64843e+07	7.80953e+07	4.76858e+07	1.10218e+08	8.23202e+07	4.597	2.2	0.0245371
2-amino-tetradecanoic acid	C14 H29 N O2	243.22	23.172			5.36432e+06	8.11558e+06	8.83777e+06	5.43249e+06	1.82971e+06	2.69972e+07	2.49526e+07	1.04934e+07	2.78404e+07	1.40186e+07	4.593	2.2	0.00610653
	C16 H32 N2 O2	284.246	7.161			2.83347e+06	3.98691e+06	2.90433e+06	1.24083e+06	543796	1.65657e+07	1.77541e+07	7.43338e+06	1.30128e+07	2.27238e+06	4.593	2.2	0.0162473
Palmitic diethanolamide	C20 H41 N O3	343.308	21.698			5.47984e+06	7.19246e+06	6.18429e+06	6.39396e+06	5.30964e+06	4.05137e+07	2.83921e+07	2.68533e+07	5.25588e+07	1.69575e+07	4.591	2.2	0.000655574
Oleamide	C18 H35 N O	281.272	22.838			3.06863e+07	1.20268e+07	2.80949e+07	2.04179e+07	1.64205e+07	1.41456e+08	9.372e+07	7.77168e+07	1.4876e+08	6.80104e+07	4.59	2.2	0.000134946
	C27 H24 N10 O6	584.189	7.285			404651	1.09064e+06	949798	1.32489e+06	995329	4.53652e+06	5.02276e+06	4.5679e+06	5.22318e+06	2.49244e+06	4.589	2.2	0.000395785
	C16 H17 N7 O2	339.143	4.23			1.12062e+07	7.7182e+06	5.7214e+06	8.9998e+06	2.61546e+06	4.00146e+07	3.52338e+07	6.76215e+06	3.60063e+07	1.20035e+07	4.565	2.19	0.0309674
N-P-Tosylglycine	C9 H11 N O4 S	229.041	6.432			1.32746e+06	3.41542e+06	4.38084e+06	1.52686e+06	189563	6.99255e+06	4.55523e+06	1.31924e+07	6.94634e+06	6.21543e+06	4.549	2.19	0.0407289
10-oxo-nonadecanoic acid	C19 H36 O3	312.266	22.609			1.43142e+07	1.46632e+07	3.97225e+07	1.18471e+07	9.62501e+06	5.55907e+07	5.8396e+07	6.48418e+07	2.14065e+08	9.45043e+07	4.53	2.18	0.00135461
	C18 H39 N7 O2 P2 S	479.238	5.363			4.91387e+06	1.00839e+06	836283	385673	171746	3.24902e+06	3.78537e+06	3.161e+06	4.66047e+06	5.16119e+06	4.526	2.18	0.0424966
	C17 H34 N2 O2	298.262	7.291			1.14292e+07	9.78933e+06	1.56583e+07	4.08323e+06	924565	4.42938e+07	6.098e+07	3.83082e+07	5.82743e+07	3.123e+07	4.525	2.18	0.0140799
	C19 H38 N2 O3	342.288	13.151			4.21816e+06	2.78653e+06	8.44026e+06	2.81596e+06	1.71304e+06	1.27342e+07	9.68004e+06	1.03859e+07	3.04694e+07	1.51999e+07	4.522	2.18	0.00328611
Diatretol	C16 H22 N2 O4	306.158	7.251			3.41709e+06	1.21145e+06	3.17604e+06	800342	155537	5.46723e+06	6.23188e+06	2.52768e+06	9.28199e+06	4.83696e+06	4.513	2.17	0.0483554
Thiolane-2-carboxylic acid	C5 H8 O2 S	132.025	23.297			1.08424e+07	5.48033e+06	1.21319e+07	4.20882e+06	2.52887e+06	2.19471e+07	2.9373e+07	1.67933e+07	4.15525e+07	2.47169e+07	4.51	2.17	0.00457791
O-butanoyl-carnitine	C11 H21 N O4	231.146	7.811			9.72035e+06	5.71676e+06	1.01628e+07	3.70171e+06	1.23323e+06	2.57496e+07	3.02392e+07	2.51342e+07	3.72232e+07	2.55218e+07	4.504	2.17	0.00915323
Nonaethylene Glycol	C18 H38 O10	414.248	5.381			2.25434e+06	1.1433e+06	818542	662892	274699	3.07534e+06	6.16677e+06	3.68293e+06	4.99154e+06	3.36806e+06	4.499	2.17	0.00692397
Apigenin 7-glucuronosyl- (1->2) -glucuronide	C27 H26 O17	622.117	6.042			1.35535e+06	352505	1.08984e+06	239194	587683	2.56449e+06	2.22096e+06	3.12625e+06	2.64396e+06	4.05373e+06	4.499	2.17	0.00664298
1,2-diacetylsphingosine	C22 H43 N O4	385.319	22.968			2.11964e+06	1.68574e+06	5.45414e+06	996594	208777	7.58308e+06	7.02755e+06	5.06919e+06	1.31476e+07	7.73946e+06	4.498	2.17	0.0278609
	C17 H33 O4 P S	364.184	4.383			2.94628e+06	459436	1.25773e+06	945868	365929	4.23877e+06	6.07836e+06	2.85321e+06	3.6382e+06	7.15028e+06	4.481	2.16	0.00876953
L-methionine	C5 H11 N O2 S	149.051	23.298			2.74734e+07	1.50932e+07	3.52177e+07	1.27887e+07	8.07579e+06	6.39789e+07	8.13635e+07	4.69387e+07	1.13028e+08	6.76126e+07	4.48	2.16	0.00303577
	C21 H40 N2 O5	400.293	23.869			2.60711e+06	1.04774e+06	1.61742e+06	733320	239987	4.59167e+06	4.69215e+06	3.29374e+06	9.70358e+06	5.14812e+06	4.478	2.16	0.0104609
	C19 H31 N7 O2 P2	451.202	25.255			8.47376e+06	3.31605e+06	2.04017e+06	4.11409e+06	4.8759e+06	1.84164e+07	1.72496e+07	1.92584e+07	4.28125e+07	5.21449e+06	4.476	2.16	0.0103545
Isobungeanool	C18 H29 N O2	291.22	19.92			2.57404e+08	1.85885e+08	5.9661e+08	1.31668e+08	1.57934e+07	8.3173e+08	9.74143e+08	3.71557e+08	1.46798e+09	6.47618e+08	4.474	2.16	0.0458388
5,7-dodecadien-1-ol	C12 H22 O	182.167	25.889			1.90192e+06	4.35298e+06	1.7803e+06	1.57873e+06	506836	1.47073e+07	1.27897e+07	6.56475e+06	7.9537e+06	4.21854e+06	4.468	2.16	0.00553499
FR198248	C9 H10 O5	198.052	4.545			1.51729e+07	1.72249e+07	1.00338e+07	1.60286e+07	3.27033e+06	6.76947e+07	6.7678e+07	4.33429e+07	1.38441e+08	1.13687e+08	4.462	2.16	0.00103828
Quinuclidinol	C7 H13 N O	127.1	6.27			1.03378e+07	5.87172e+06	1.4064e+07	4.77359e+06	3.58479e+06	2.6187e+07	2.7339e+07	1.45999e+07	4.76163e+07	2.35822e+07	4.46	2.16	0.00327089
	C17 H32 N2 O8	392.216	4.648			1.13897e+07	2.7095e+06	3.46068e+06	3.92128e+06	1.06188e+06	8.61905e+06	1.90281e+07	1.5421e+07	1.1591e+07	1.65589e+07	4.456	2.16	0.0177252
	C25 H43 N3 O5	465.32	8.385			4.59099e+06	3.72446e+06	5.88916e+06	2.23511e+06	2.62808e+06	1.15287e+07	1.96783e+07	1.65941e+07	4.81208e+07	9.00848e+06	4.455	2.16	0.00255764
	C21 H24 O4 P2	402.116	4.007			1.4551e+06	844467	950373	751036	670889	4.24234e+06	3.58563e+06	3.75956e+06	4.7895e+06	3.71e+06	4.452	2.15	0.00010781
N-lauroyl glycine	C14 H27 N O3	257.199	19.888			1.25228e+09	7.65254e+08	1.51359e+09	6.68343e+08	5.15969e+08	3.38068e+09	3.75922e+09	2.33237e+09	5.34347e+09	2.76519e+09	4.418	2.14	0.000790863
(4E,6E,d14:2) sphingosine	C14 H27 N O2	241.204	14.887			4.87549e+06	8.62986e+06	6.52106e+06	5.31199e+06	7.05968e+06	2.94068e+07	2.87573e+07	1.58451e+07	3.623e+07	1.35556e+07	4.41	2.14	0.000951409
	C19 H37 N3 O2 S2	403.233	23.792			1.81748e+06	714087	1.17487e+06	1.21467e+06	1.53808e+06	5.33076e+06	4.5573e+06	6.06708e+06	1.04455e+07	3.2262e+06	4.389	2.13	0.000378167
	C19 H47 N10 O7 P	558.337	6.175			3.93593e+06	1.35053e+06	764799	1.28172e+06	272468	5.61888e+06	6.00781e+06	2.90679e+06	6.21164e+06	4.08219e+06	4.384	2.13	0.0231318
N-palmitoyl proline	C21 H39 N O3	353.293	23.039			2.17802e+07	7.06974e+06	1.57756e+07	6.72597e+06	4.71367e+06	3.09593e+07	3.77548e+07	2.55297e+07	6.72775e+07	2.49043e+07	4.379	2.13	0.00701082
Undecylic acid	C11 H22 O2	186.162	25.28			7.9764e+06	1.04741e+07	1.779e+07	4.20943e+06	4.23571e+06	3.49059e+07	3.89537e+07	2.94613e+07	5.1958e+07	2.98653e+07	4.376	2.13	0.00305536
octadec-9-ynoic acid	C18 H32 O2	262.23	20.608	90.8		6.15505e+06	2.47681e+06	5.94086e+06	4.36996e+06	7.64513e+06	2.91079e+07	2.59934e+07	2.30158e+07	3.09113e+07	2.4168e+07	4.375	2.13	0.000613778
	C19 H30 N6 O4	406.231	5.459			1.50716e+07	3.30612e+06	5.6924e+06	5.98919e+06	1.69091e+06	1.43312e+07	3.32417e+07	2.48849e+07	2.31856e+07	2.59161e+07	4.372	2.13	0.00936993
	C15 H39 N6 O3 P	382.283	22.161			6.80912e+06	5.26594e+06	5.12769e+06	3.23831e+06	2.98054e+06	2.16019e+07	2.24101e+07	2.07433e+07	3.41129e+07	2.54208e+07	4.37	2.13	5.6641e-05
Oleic acid, trimethylsilyl ester	C21 H42 O2 Si	354.296	23.036			5.3778e+06	1.49266e+06	3.12115e+06	1.30849e+06	924768	6.52177e+06	8.31227e+06	5.43363e+06	1.5282e+07	5.31477e+06	4.369	2.13	0.0100099
	C16 H32 N2 O2	284.246	6.797			6.84251e+06	7.05329e+06	4.28038e+06	3.29975e+06	1.86835e+06	1.86896e+07	3.22693e+07	1.23764e+07	2.04532e+07	3.30683e+06	4.366	2.13	0.0365505
	C17 H40 N O P3 S	399.205	23.296			1.95375e+07	8.98533e+06	2.22754e+07	7.37615e+06	4.07691e+06	3.87068e+07	4.12208e+07	2.88653e+07	5.21694e+07	3.92191e+07	4.365	2.13	0.0110346
	C22 H42 N6 O5	470.322	9.134			3.23651e+06	1.14788e+06	1.66804e+06	684724	311553	4.74236e+06	6.90769e+06	3.22388e+06	9.75792e+06	5.00841e+06	4.363	2.13	0.0102306
N-oleoyl L-serine	C21 H39 N O4	369.287	25.206			3.01273e+06	843602	621017	1.02772e+06	948999	4.13495e+06	3.67422e+06	4.25221e+06	8.54322e+06	1.29824e+06	4.357	2.12	0.0163382
3-[(E)-(9-Amino-7-ethoxy-3-acridinyl)diazenyl]-2,6-pyridinediamine	C20 H19 N7 O	373.164	6.398			2.16803e+06	857333	1.08693e+06	869273	225922	2.93405e+06	3.78433e+06	944500	4.65523e+06	5.43959e+06	4.353	2.12	0.0274993
Piericidin B5	C27 H41 N O4	443.303	24.218			1.5704e+07	6.73059e+06	1.5859e+07	1.17008e+07	8.41275e+06	3.64697e+07	4.21599e+07	5.09231e+07	9.01063e+07	5.36782e+07	4.352	2.12	0.000151465
Bis(carbamoylamino)acetate	C4 H7 N4 O4	175.047	1.401			6.64285e+07	2.7147e+07	4.7591e+07	2.2961e+07	2.00205e+07	1.19063e+08	1.17724e+08	5.71836e+07	2.03082e+08	6.90319e+07	4.337	2.12	0.00771758
Fusariumin B	C24 H47 N O4	413.35	24.798			1.24824e+07	3.05768e+06	7.65852e+06	3.4186e+06	1.09929e+06	1.65202e+07	1.48007e+07	1.37308e+07	4.26323e+07	1.29734e+07	4.329	2.11	0.0194881
	C10 H19 P S2	234.067	1.736			4.76418e+06	1.68833e+06	1.9117e+06	845338	463800	7.30838e+06	8.23884e+06	3.67344e+06	9.40215e+06	6.24827e+06	4.329	2.11	0.0139185
	C8 H23 N6 O5 P	314.148	4.452			5.41448e+06	1.98078e+06	2.27988e+06	2.5737e+06	598215	5.68074e+06	1.17523e+07	6.3404e+06	9.85689e+06	1.0649e+07	4.323	2.11	0.0127822
Xestoaminol B	C14 H27 N O	225.209	22.512			4.06787e+06	2.83175e+06	4.34499e+06	3.29921e+06	4.14636e+06	2.70914e+07	1.75359e+07	1.20538e+07	2.34277e+07	1.00278e+07	4.311	2.11	0.000508172
	C17 H37 N6 O3 P	404.267	23.04			1.17081e+07	7.81892e+06	1.55675e+07	4.03684e+06	805273	3.35873e+07	4.23341e+07	2.31428e+07	5.44312e+07	3.08886e+07	4.296	2.1	0.0212078
Semiplenamide G	C24 H45 N O4	411.335	23.824			1.50353e+07	5.92051e+06	9.36789e+06	5.13509e+06	2.93762e+06	2.54288e+07	2.22325e+07	2.37555e+07	6.10275e+07	3.10153e+07	4.295	2.1	0.00257603
	C24 H28 O S	364.184	4.179			3.99089e+06	618049	1.64046e+06	1.11043e+06	338961	2.65176e+06	5.48156e+06	3.27653e+06	4.76964e+06	7.58496e+06	4.295	2.1	0.0248666
Pentadecanoyl-EA	C17 H35 N O2	285.267	24.277			1.34979e+06	2.68682e+06	4.69681e+06	3.56466e+06	2.73259e+06	1.72222e+07	1.17326e+07	7.46194e+06	1.68749e+07	7.94277e+06	4.294	2.1	0.000886022
N-(5-acetamidopentyl)acetamide	C9 H18 N2 O2	208.121	4.098	93.5		4.12318e+06	3.35513e+06	2.65319e+06	2.37871e+06	2.53443e+06	1.13699e+07	1.60205e+07	9.30944e+06	1.7455e+07	4.18863e+06	4.285	2.1	0.0051429
N,N'-1,2-Ethanediylbis(2-propylpentanamide)	C18 H36 N2 O2	312.277	7.925			1.69832e+06	2.39845e+06	1.44845e+06	883357	195760	6.934e+06	6.90251e+06	3.66347e+06	6.19353e+06	1.54732e+06	4.276	2.1	0.0261021
	C18 H17 N7 O	347.151	4.894			4.24368e+06	851675	634426	1.24992e+06	654008	3.63882e+06	3.47256e+06	3.47077e+06	4.8847e+06	4.68428e+06	4.273	2.1	0.0216998
Z-Ala-Gln-OH	C16 H21 N3 O6	351.143	5.168			3.93626e+06	1.81085e+06	1.48443e+06	1.64953e+06	615540	7.04577e+06	8.66669e+06	3.73038e+06	1.06519e+07	5.18558e+06	4.271	2.09	0.00527862
	C21 H43 N O5	389.314	21.698			3.33827e+06	4.66575e+06	3.71383e+06	3.67305e+06	2.96085e+06	2.23905e+07	1.56383e+07	1.56521e+07	2.93375e+07	9.99683e+06	4.261	2.09	0.000381711
9-hydroxy-hexadecan-1,16-dioic acid	C16 H30 O5	302.209	9.675			6.03129e+06	3.43326e+06	3.01141e+06	2.66675e+06	2.44008e+06	1.40468e+07	1.31737e+07	1.28191e+07	1.25641e+07	1.1351e+07	4.257	2.09	0.000797601
	C20 H36 N2 O4	368.267	7.926			702180	943517	1.64464e+06	793993	1.32657e+06	3.2489e+06	3.86903e+06	7.52698e+06	4.01076e+06	5.433e+06	4.251	2.09	0.000128069
	C19 H40 N5 O3 P	417.288	24.292			3.85572e+06	2.02404e+06	6.1192e+06	2.72348e+06	3.0855e+06	1.30774e+07	1.11773e+07	7.78738e+06	2.67727e+07	1.3303e+07	4.238	2.08	0.000989878
		140.057	1.654			6.96393e+06	8.14535e+06	1.64253e+07	5.99589e+06	1.71817e+06	2.87955e+07	3.92856e+07	1.05188e+07	6.31214e+07	2.94292e+07	4.226	2.08	0.0116284
Octahydro-1,2,8-indolizinetriol	C8 H15 N O3	173.105	6.088			5.02917e+06	2.39239e+06	8.08506e+06	1.80671e+06	892187	1.22337e+07	1.01086e+07	5.24084e+06	1.92475e+07	7.87681e+06	4.225	2.08	0.0257313
(4E,6E,d14:2) sphingosine	C14 H27 N O2	241.204	15.404			6.67398e+06	1.17735e+07	8.27512e+06	6.69954e+06	8.14394e+06	3.55174e+07	3.43892e+07	1.7789e+07	4.39104e+07	1.63093e+07	4.223	2.08	0.00164368
(2S)-2-Amino-5-carbamimidamidopentanoate	C6 H13 N4 O2	173.104	6.268			8.04675e+07	4.97669e+07	1.10057e+08	3.61418e+07	1.91169e+07	2.16381e+08	2.10184e+08	1.14611e+08	3.70845e+08	1.91758e+08	4.223	2.08	0.00613635
(9Z)-(7S,8S)-Dihydroxyoctadecenoic acid	C18 H34 O4	314.246	26.78			1.15e+06	2.39777e+06	764414	1.64546e+06	387329	4.36546e+06	6.14747e+06	4.84954e+06	6.4745e+06	1.49921e+06	4.217	2.08	0.0109676
Cis-7-tetradecenoyl-D-asparagine	C18 H32 N2 O4	340.236	14.905			3.68558e+07	1.77453e+07	1.80518e+07	1.42888e+07	1.13965e+07	7.47323e+07	1.19317e+08	6.2997e+07	1.2675e+08	6.83857e+07	4.211	2.07	0.000297348
	C20 H39 N O5	373.283	12.079			1.03873e+06	1.45261e+06	3.60474e+06	640136	262461	4.12363e+06	4.36285e+06	3.96421e+06	1.48714e+07	6.33569e+06	4.2	2.07	0.0108175
	C15 H32 N5 O P	329.235	24.262			8.03238e+06	2.84867e+06	1.26117e+07	3.24989e+06	2.07903e+06	1.36015e+07	1.34957e+07	7.15516e+06	1.89425e+07	1.38183e+07	4.185	2.07	0.0349296
Pyrrolizixenamide A	C13 H20 N2 O2	236.152	5.07			4.48735e+06	1.77356e+06	6.69768e+06	1.64412e+06	447673	6.93979e+06	1.23881e+07	3.39777e+06	1.61673e+07	7.41944e+06	4.183	2.06	0.0433898
Pyridoxine	C8 H11 N O3	169.074	2.035	93.3	C00314	1.29454e+06	6.1735e+06	4.91458e+06	5.52557e+06	1.14512e+07	2.83295e+07	1.85585e+07	1.19775e+07	3.76575e+07	2.30578e+07	4.173	2.06	0.00868115
	C24 H28 N3 O3 P	437.187	24.838			5.29959e+06	1.99287e+06	2.28999e+06	2.974e+06	3.32468e+06	1.23946e+07	9.779e+06	1.27773e+07	2.77286e+07	5.0891e+06	4.168	2.06	0.00417637
	C17 H26 N6	314.22	16.671			5.39787e+07	3.3547e+07	5.66979e+07	1.74751e+07	1.00358e+07	1.39727e+08	2.0692e+08	8.00036e+07	2.4884e+08	1.26332e+08	4.165	2.06	0.00436753
	C23 H43 N O4 S	429.291	24.533			1.46558e+07	4.02967e+06	7.06833e+06	4.5451e+06	3.40338e+06	1.85775e+07	1.8916e+07	1.89553e+07	3.87547e+07	1.47623e+07	4.162	2.06	0.00483761
Sphingosine (d18:1)	C18 H37 N O2	321.267	20.206	91.8		1.29242e+06	5.50638e+06	5.11974e+06	5.22232e+06	8.197e+06	1.90011e+07	2.27342e+07	2.17324e+07	3.2285e+07	1.20177e+07	4.161	2.06	0.00477034
	C18 H38 N5 O4 P	419.265	25.255			5.07111e+06	1.99603e+06	1.27001e+06	2.3225e+06	2.94517e+06	9.66278e+06	9.33259e+06	1.07986e+07	1.60562e+07	3.13267e+06	4.161	2.06	0.00775736
(2S)-2-[(2-{[(2S,3R,4R,5S,6R)-3-Acetamido-2,5-dihydroxy-6-(hydroxymethyl)tetrahydro-2H-pyran-4-yl]oxy}propyl)amino]propanoic acid	C14 H26 N2 O8	350.169	4.04			1.21671e+07	3.23078e+06	4.97455e+06	4.00488e+06	1.00181e+06	5.88838e+06	1.66487e+07	2.15148e+07	1.29119e+07	2.63182e+07	4.157	2.06	0.0253686
	C25 H53 N10 O10 P	684.37	6.869			2.89687e+06	1.01686e+06	339945	772874	531622	2.63806e+06	3.45902e+06	3.211e+06	3.75009e+06	2.05246e+06	4.155	2.05	0.0222768
		136.051	4.55			2.27292e+06	2.76238e+06	1.75588e+06	3.13469e+06	2.18305e+06	8.45256e+06	9.42067e+06	6.0507e+06	1.89883e+07	1.44989e+07	4.145	2.05	0.000633293
N-(dodecanoyl)-homoserine lactone	C16 H29 N O3	283.215	15.462			1.12885e+07	5.52186e+06	9.41958e+06	4.05793e+06	2.13317e+06	2.27619e+07	2.85079e+07	1.47513e+07	3.92633e+07	2.28823e+07	4.144	2.05	0.00448921
	C17 H32 N4 O3	340.247	7.874			3.00475e+06	2.51328e+06	1.83344e+06	2.30479e+06	2.63971e+06	1.04016e+07	9.83263e+06	8.55701e+06	1.06731e+07	2.01621e+07	4.139	2.05	8.00494e-05
	C18 H27 N7 O	357.226	9.525			2.02173e+06	2.05983e+06	1.61129e+06	868248	557352	6.65919e+06	9.54268e+06	4.6633e+06	1.04611e+07	6.30217e+06	4.133	2.05	0.000887062
(2-Phenyl-1-azetidinyl)(2,4,6-triisopropylphenyl)methanethione	C25 H33 N S	379.233	24.278			3.94384e+06	2.07032e+06	2.16494e+06	2.17428e+06	2.89878e+06	8.98263e+06	5.11291e+06	9.75157e+06	9.08888e+06	7.90558e+06	4.131	2.05	0.000154322
Caffeic acid	C9 H8 O4	180.041	4.549	97.4	C01197	2.43575e+06	2.71848e+06	1.73249e+06	3.21248e+06	1.94126e+06	9.73172e+06	1.00502e+07	9.4344e+06	1.80771e+07	1.55202e+07	4.126	2.04	1.79317e-05
	C18 H33 N3 O5	371.241	14.704			4.82136e+06	3.18787e+06	5.08998e+06	1.55045e+06	728222	1.31501e+07	1.71386e+07	6.88831e+06	2.0717e+07	1.04811e+07	4.125	2.04	0.0074887
3,7,11-Trimethyl-6E,10-dodecadien-1-ol	C15 H28 O	224.214	25.756			2.51436e+06	5.07092e+06	2.81601e+06	2.68361e+06	2.4112e+06	1.14757e+07	8.9078e+06	1.10682e+07	1.24135e+07	4.45168e+06	4.124	2.04	0.00167156
Streptodiketopiperazine A	C13 H14 N2 O2	230.106	5.763			4.45244e+06	2.859e+06	4.59868e+06	2.80348e+06	1.4195e+06	1.46493e+07	1.17881e+07	2.98689e+06	1.51509e+07	5.85164e+06	4.123	2.04	0.0269712
PGF2alpha dimethyl amide	C22 H39 N O4	381.288	24.521			1.80874e+07	8.64396e+06	1.12564e+07	9.34462e+06	8.74251e+06	3.85126e+07	3.60096e+07	4.82306e+07	6.95755e+07	3.10392e+07	4.121	2.04	0.000111349
N-tetradecanoyl-homoserine lactone	C18 H33 N O3	311.246	24.267			8.95522e+07	4.3387e+07	6.27593e+07	5.32766e+07	7.34325e+07	2.66721e+08	2.23675e+08	2.57783e+08	4.02727e+08	2.45443e+08	4.107	2.04	2.16551e-05
febrifugin	C16 H19 N3 O3	301.143	5.508			7.06702e+07	2.86693e+07	2.51218e+07	2.33519e+07	7.33805e+06	1.03155e+08	1.08197e+08	5.15422e+07	1.21688e+08	8.2767e+07	4.106	2.04	0.0188465
Acetic acid, [1,4,7,10-tetraazacyclododecane-1,7-diyl]bis	C12 H24 N4 O4	288.18	4.446			3.25246e+06	2.65038e+06	1.20944e+06	1.87252e+06	1.3588e+06	5.81642e+06	9.08633e+06	8.55676e+06	7.666e+06	4.72662e+06	4.094	2.03	0.00078768
N-Acetyl-L-histidine	C8 H11 N3 O3	197.08	1.191			9.33225e+06	6.56596e+06	1.74616e+07	6.68403e+06	3.40552e+06	2.73305e+07	3.69634e+07	8.45698e+06	4.09891e+07	2.14484e+07	4.089	2.03	0.0183041
Oleoyl ethanolamide	C20 H39 N O2	325.298	21.694	98.6	C20792	2.18998e+07	2.10894e+07	2.0228e+07	1.82919e+07	1.57172e+07	1.18267e+08	8.25962e+07	7.79042e+07	1.51366e+08	4.95387e+07	4.083	2.03	0.000742523
	C20 H30 N2 O8	426.2	5.14			7.01846e+06	1.52052e+06	3.0535e+06	2.8109e+06	616759	5.44088e+06	1.39839e+07	1.14703e+07	9.53877e+06	1.33985e+07	4.081	2.03	0.0160143
Linoleyl hydroxamic acid	C18 H33 N O2	295.251	21.948			3.13022e+07	2.90755e+07	8.50696e+07	5.82073e+07	6.63126e+07	2.37e+08	2.6364e+08	2.36798e+08	3.51883e+08	1.62867e+08	4.072	2.03	0.000481261
	C20 H31 N7 O	385.257	14.151			3.0292e+07	1.65715e+07	2.12206e+07	7.91844e+06	3.67332e+06	6.71923e+07	9.29762e+07	4.44908e+07	1.1532e+08	6.71915e+07	4.055	2.02	0.00636975
	C23 H41 N O4 S	427.275	23.26			2.12475e+07	5.28072e+06	6.63541e+06	3.91421e+06	3.60444e+06	2.70057e+07	1.70665e+07	2.13947e+07	4.72968e+07	1.76263e+07	4.051	2.02	0.0101282
N-linoleoyl dopamine	C26 H41 N O3	415.308	23.594			8.38643e+06	7.26923e+06	2.1998e+07	9.55372e+06	4.7021e+06	3.38503e+07	3.83083e+07	3.39343e+07	5.59163e+07	2.65224e+07	4.046	2.02	0.00278182
	C15 H13 N5 O4 S	359.067	5.028			741796	815911	770060	923795	902102	3.61556e+06	2.66087e+06	3.2997e+06	4.37757e+06	2.80473e+06	4.044	2.02	1.2254e-05
10-oxo-nonadecanoic acid	C19 H36 O3	312.266	22.906			1.5966e+07	1.82952e+07	5.30733e+07	9.80475e+06	6.81597e+06	6.1609e+07	5.82364e+07	6.45109e+07	2.48603e+08	9.10373e+07	4.041	2.01	0.00534152
2-Amino-1-cyclohexyl-1,2,5-trideoxy-5-(4-morpholinyl)-L-arabinitol	C15 H30 N2 O3	286.225	7.915			1.18702e+08	1.05122e+08	2.07259e+08	8.45717e+07	6.46472e+07	4.00795e+08	4.22561e+08	2.13538e+08	7.10242e+08	4.28924e+08	4.02	2.01	0.00122185
	C20 H43 N8 O4 P	490.315	7.061			5.52855e+06	2.38477e+06	1.5965e+06	1.26822e+06	252058	3.83357e+06	8.42869e+06	4.57396e+06	7.57017e+06	6.40305e+06	4.011	2	0.048932
	C15 H25 N3 O6	343.174	3.672			1.59037e+07	8.10455e+06	5.03519e+06	7.2265e+06	1.75956e+06	2.60714e+07	2.89754e+07	1.62897e+07	3.1798e+07	3.06527e+07	4.01	2	0.0128552
NP-008309	C11 H13 N O3	207.089	6.669	91.2		1.65077e+08	8.68122e+07	2.21645e+08	4.96333e+07	2.22912e+07	3.51393e+08	3.48051e+08	1.8374e+08	6.19899e+08	2.86468e+08	4.009	2	0.0233709
	C25 H46 N7 O3 P	523.341	25.124			1.4034e+06	511315	345341	669198	759624	3.85568e+06	2.67792e+06	2.55446e+06	9.28101e+06	1.11378e+06	4.002	2	0.00752953
Glutarylcarnitine	C12 H21 N O6	275.137	5.255			3.14867e+06	1.22195e+06	1.14866e+06	1.48545e+06	842147	5.45659e+06	7.26953e+06	3.63692e+06	4.88774e+06	3.29524e+06	4	2	0.00265417
Caffeic acid	C9 H8 O4	180.041	5.824	99.6		6.78202e+06	1.60232e+07	1.63853e+07	1.79111e+07	2.15043e+07	5.63323e+07	6.59084e+07	4.53431e+07	9.78844e+07	6.51779e+07	3.978	1.99	0.000507889
	C18 H30 O13	454.17	4.317			3.57598e+06	1.80824e+06	1.20137e+06	593251	109846	5.73115e+06	5.93696e+06	2.51946e+06	4.74069e+06	4.77892e+06	3.978	1.99	0.0480057
	C8 H15 P S	174.063	1.696			3.65111e+06	1.68666e+06	4.24727e+06	1.94314e+06	1.53243e+06	8.43987e+06	7.71679e+06	7.08718e+06	1.42286e+07	5.45519e+06	3.971	1.99	0.00190156
3-hydroxy-N-(1-hydroxy-3-methylpentan-2-yl)-5-oxohexanamide	C12 H23 N O4	245.162	8.807			1.89918e+07	1.16218e+07	1.88209e+07	6.63221e+06	1.67786e+06	3.78434e+07	4.98149e+07	4.15392e+07	6.54188e+07	4.61219e+07	3.969	1.99	0.0178873
N-[2-(Hydroxycarbamoyl)-4-methylpentanoyl]alanylglycinamide	C12 H22 N4 O5	302.159	4.501			4.95541e+06	2.32886e+06	1.75983e+06	1.14518e+06	449454	6.98381e+06	7.87161e+06	3.6313e+06	7.18473e+06	5.85398e+06	3.968	1.99	0.024786
Peniginseng B	C10 H11 N O5	225.063	4.138			1.2324e+07	3.55315e+06	1.79926e+06	2.49492e+06	1.72452e+06	9.89802e+06	1.32646e+07	9.6184e+06	1.60563e+07	7.85189e+06	3.967	1.99	0.0237413
Laingolide	C21 H37 N O3	351.277	25.256			8.0378e+07	3.5818e+07	2.44075e+07	4.3165e+07	5.01689e+07	1.70951e+08	1.63881e+08	1.82603e+08	3.3228e+08	5.83041e+07	3.96	1.99	0.00657504
	C15 H29 N O3 S	303.187	19.295			5.36126e+07	3.72187e+07	8.61509e+07	2.87876e+07	1.79981e+07	1.3936e+08	1.82888e+08	1.10894e+08	2.68942e+08	1.47389e+08	3.96	1.99	0.00303496
1-Dodecyl-5-methyl-2-pyrrolidinone	C17 H33 N O	267.256	24.25			1.94198e+07	8.45332e+06	3.42648e+07	8.53811e+06	4.83063e+06	3.32892e+07	3.37146e+07	2.0676e+07	4.60071e+07	3.6117e+07	3.949	1.98	0.0387264
Streptazone B2	C10 H11 N O	161.084	6.671			1.19266e+07	5.79041e+06	1.28803e+07	2.46528e+06	1.49598e+06	2.41675e+07	2.27884e+07	1.22295e+07	4.14241e+07	1.79813e+07	3.936	1.98	0.0222162
	C13 H25 N8 O4 P	388.174	6.608			6.54212e+06	4.33426e+06	2.07889e+06	5.91056e+06	3.92564e+06	1.69914e+07	2.02551e+07	1.35128e+07	1.77898e+07	9.91931e+06	3.92	1.97	0.00118178
N-[(Z)-hexadec-9-enoyl]glycine methyl ester (Z9-C16:1-NAGME)	C19 H35 N O3	325.261	24.192			3.01381e+06	2.09245e+06	2.47248e+06	850559	1.72825e+06	8.20042e+06	7.69575e+06	4.93361e+06	1.22381e+07	8.57973e+06	3.919	1.97	0.000864285
	C18 H36 N5 O4 P	417.249	24.312			3.32606e+06	2.25863e+06	2.06997e+06	1.96205e+06	3.18568e+06	8.10002e+06	8.84877e+06	1.18631e+07	8.93404e+06	6.07245e+06	3.918	1.97	4.40825e-05
Quinuclidinol	C7 H13 N O	127.1	6.088			1.60236e+07	8.2401e+06	2.29381e+07	5.903e+06	3.40866e+06	3.42182e+07	3.22797e+07	1.57743e+07	5.73998e+07	2.22918e+07	3.917	1.97	0.0233266
	C15 H37 N7 O S	363.277	25.179			399697	571786	288613	561747	588792	3.31779e+06	2.20026e+06	1.63465e+06	4.87916e+06	1.00779e+06	3.917	1.97	0.00219693
N,N'-1,2-Ethanediylbis(2-propylpentanamide)	C18 H36 N2 O2	312.277	7.737			2.14807e+06	2.7626e+06	2.01796e+06	1.03934e+06	247862	8.99049e+06	1.07622e+07	5.19323e+06	7.89175e+06	1.27107e+06	3.911	1.97	0.0349937
(4-Ethoxyphenyl)urea	C9 H12 N2 O2	180.09	5.73			1.83863e+06	1.05846e+06	1.17055e+06	1.02989e+06	600023	4.55971e+06	4.1112e+06	3.66574e+06	9.53216e+06	1.93539e+06	3.884	1.96	0.00307955
octadec-9-ynoic acid	C18 H32 O2	262.229	25.957	92.2		1.18748e+07	2.06825e+07	1.36865e+07	1.31272e+07	1.21402e+07	4.24944e+07	5.09591e+07	5.3966e+07	9.86257e+07	3.98361e+07	3.882	1.96	0.000228187
LAPAO	C17 H36 N2 O2	300.278	6.847			4.05943e+07	2.22669e+07	3.0566e+07	8.71851e+06	1.75172e+06	6.92527e+07	8.78775e+07	4.35101e+07	1.15625e+08	8.64111e+07	3.881	1.96	0.0347903
	C12 H23 N3 O5 S2	353.108	4.053			2.31429e+06	1.70535e+06	1.26463e+06	615082	208827	5.2126e+06	4.90657e+06	1.70298e+06	9.49054e+06	3.51977e+06	3.88	1.96	0.020037
Cyclo-(L-Pro-L-Tyr-L-Pro-Val-)	C24 H32 N4 O5	456.237	5.822			3.2494e+06	973063	1.10074e+06	522350	178683	3.53672e+06	4.08599e+06	2.29156e+06	3.77251e+06	5.41828e+06	3.877	1.95	0.0299467
	C15 H36 N5 O3 P	365.257	22.775			3.83138e+06	1.72773e+06	1.87211e+06	1.53345e+06	1.15781e+06	6.68168e+06	6.19126e+06	6.423e+06	1.2078e+07	7.3379e+06	3.867	1.95	0.000669677
Serinolamides D	C23 H43 N O4	397.319	23.097			5.52741e+06	2.4831e+06	4.63602e+06	1.97195e+06	967859	9.50451e+06	9.58776e+06	9.1501e+06	2.24727e+07	1.46621e+07	3.861	1.95	0.00454245
	C17 H35 N6 O2 P	386.257	23.656			3.07298e+07	1.56602e+07	5.28541e+07	1.52651e+07	8.4598e+06	5.59744e+07	6.49562e+07	3.25146e+07	1.12152e+08	6.04185e+07	3.858	1.95	0.0225451
	C17 H43 N6 O3 P	410.314	24.411			8.67877e+06	4.20068e+06	4.79266e+06	5.41947e+06	7.11869e+06	1.64021e+07	1.83279e+07	2.33878e+07	3.81927e+07	2.08905e+07	3.855	1.95	0.000142043
	C22 H49 N2 O7 P	484.329	25.492			327628	372991	364273	391922	366626	1.67489e+06	1.19629e+06	1.41289e+06	5.6385e+06	908793	3.854	1.95	0.00780668
Capnine	C17 H37 N O4 S	351.244	18.277			2.05654e+06	3.88356e+06	4.33163e+06	4.35522e+06	8.65591e+06	1.66885e+07	1.04762e+07	2.27925e+07	2.94049e+07	1.59206e+07	3.853	1.95	0.00119797
N-decanoyl-homoserine lactone	C14 H25 N O3	255.183	16.198			3.65334e+06	3.03939e+06	3.84499e+06	1.57108e+06	1.88118e+06	1.1661e+07	1.18179e+07	8.58424e+06	1.97623e+07	8.49458e+06	3.837	1.94	0.000283134
N-palmitoyl glycine	C18 H35 N O3	313.261	24.251			1.77674e+09	7.90551e+08	2.82211e+09	7.7409e+08	4.3163e+08	3.03134e+09	3.00135e+09	1.95004e+09	4.18521e+09	3.46546e+09	3.834	1.94	0.0306025
3-[(1,2,3,3-Tetramethyl-2-azabicyclo[2.2.2]oct-5-yl)oxy]-1-propanamine	C14 H28 N2 O	240.22	21.052			5.15082e+06	3.27535e+06	8.64102e+06	6.61412e+06	6.20696e+06	2.74721e+07	2.37817e+07	1.30526e+07	2.44839e+07	1.21267e+07	3.831	1.94	0.000911131
	C19 H25 N9 O3	427.207	5.392			7.89355e+06	4.44816e+06	5.91072e+06	1.92986e+06	845232	1.71934e+07	1.75503e+07	1.20017e+07	1.70249e+07	1.67497e+07	3.827	1.94	0.0160145
	C22 H35 N7 O2	429.283	14.201			1.24931e+07	6.68724e+06	8.35661e+06	3.43116e+06	789564	2.51043e+07	3.40694e+07	1.6943e+07	4.27162e+07	2.5583e+07	3.826	1.94	0.0173617
Nitrosoxacin A	C16 H34 N2 O2	286.262	6.819			2.90466e+06	2.49649e+06	2.42945e+06	883736	127128	9.2848e+06	1.31818e+07	4.99296e+06	1.03169e+07	3.15613e+06	3.822	1.93	0.0316371
Neovasipyridone A	C21 H35 N O3	349.261	24.292			9.16906e+07	4.5927e+07	5.75618e+07	6.35223e+07	7.79088e+07	2.36883e+08	2.42291e+08	3.10263e+08	3.53319e+08	1.6985e+08	3.814	1.93	5.25902e-05
Myristoyl sarcosine	C17 H33 N O3	299.246	24.257			1.75529e+08	9.61991e+07	1.53399e+08	9.71971e+07	7.09468e+07	3.62607e+08	4.04057e+08	3.69842e+08	5.00469e+08	3.65828e+08	3.805	1.93	0.000800865
	C27 H36 N6 O3	492.283	17.609			7.10891e+06	3.35357e+06	4.66849e+06	2.22211e+06	726370	1.27588e+07	1.87107e+07	9.08792e+06	2.19072e+07	1.21626e+07	3.805	1.93	0.0109013
	C11 H27 N6 O2 P	306.194	5.449			2.25866e+06	1.30285e+06	2.43863e+06	1.49759e+06	1.34941e+06	5.68911e+06	5.59277e+06	5.83612e+06	6.67779e+06	3.94106e+06	3.799	1.93	0.00016599
N-lauroyl lysine	C18 H36 N2 O3	328.272	10.964			2.13578e+08	1.15384e+08	2.39828e+08	1.1039e+08	8.43148e+07	5.5489e+08	4.25016e+08	3.76113e+08	4.88478e+08	4.3822e+08	3.798	1.93	0.00302777
9-mercaptodethiobiotin	C10 H18 N2 O3 S	246.104	3.858			6.26203e+07	2.44779e+07	2.52425e+07	2.06074e+07	5.29821e+06	9.29507e+07	9.43747e+07	4.27023e+07	1.10533e+08	7.6434e+07	3.797	1.92	0.025136
	C9 H13 N O4 S	231.056	5.334			7.069e+06	3.65802e+06	9.56032e+06	2.22154e+06	1.2885e+06	1.389e+07	1.49737e+07	4.58507e+06	2.51807e+07	9.07275e+06	3.797	1.92	0.0406349
N-myristoyl glutamine	C19 H36 N2 O4	356.267	22.738			8.75308e+06	3.95037e+06	5.02888e+06	2.06349e+06	498179	1.49886e+07	2.02058e+07	9.80853e+06	2.54907e+07	1.42587e+07	3.794	1.92	0.0209129
	C33 H48 O2 P2	538.315	5.277			2.67621e+06	1.28589e+06	697395	1.67562e+06	1.17106e+06	4.87445e+06	5.23227e+06	4.38797e+06	5.49705e+06	4.49099e+06	3.791	1.92	0.00380764
Pestalotiopamide E	C11 H17 N O5	243.11	5.757			1.01406e+06	1.88671e+06	1.49915e+06	950998	777621	7.34172e+06	4.73527e+06	3.35722e+06	3.84128e+06	3.23384e+06	3.788	1.92	0.000358135
	C13 H35 N6 O5 P	386.241	15.935			2.56324e+07	1.38216e+07	1.71846e+07	9.87464e+06	5.30835e+06	5.23012e+07	8.2833e+07	3.19242e+07	9.07578e+07	4.55043e+07	3.784	1.92	0.00235482
Trileucine	C18 H35 N3 O4	357.263	14.906			1.12352e+08	5.63552e+07	5.70011e+07	4.50867e+07	3.64642e+07	2.13212e+08	3.42426e+08	1.91973e+08	3.60822e+08	2.0309e+08	3.783	1.92	0.000313875
9-Keto heptadecylic acid	C17 H32 O3	284.235	25.758			6.51169e+06	1.33384e+07	8.61688e+06	5.61428e+06	6.47241e+06	2.4381e+07	2.45775e+07	2.47382e+07	3.08333e+07	1.29494e+07	3.774	1.92	0.000967072
(2S)-2-Amino-5-carbamimidamidopentanoate	C6 H13 N4 O2	173.104	6.088			6.07583e+07	3.30557e+07	9.12935e+07	2.0037e+07	1.02279e+07	1.29091e+08	1.2444e+08	6.46902e+07	2.03853e+08	9.85165e+07	3.765	1.91	0.0277012
	C16 H32 N2 O2	284.246	6.939			2.51581e+06	2.95535e+06	2.42243e+06	1.01831e+06	590692	1.04815e+07	1.86685e+07	5.35551e+06	9.11752e+06	1.69841e+06	3.764	1.91	0.0225035
	C22 H36 N6	384.299	23.861			1.60043e+07	6.42165e+06	6.83068e+06	7.27809e+06	7.29948e+06	2.63151e+07	3.21151e+07	2.50219e+07	7.00728e+07	2.73517e+07	3.758	1.91	0.000614799
Laingolide	C21 H37 N O3	351.277	21.292			5.87305e+06	3.07047e+06	3.89642e+06	2.69991e+06	2.04496e+06	8.81257e+06	1.15164e+07	1.00358e+07	4.27308e+07	1.22768e+07	3.751	1.91	0.00393331
9-methoxyfumitremorgin C	C23 H27 N3 O4	409.2	6.791			2.38797e+07	9.19409e+06	6.33838e+06	4.43236e+06	2.11252e+06	2.37627e+07	2.57121e+07	1.49434e+07	3.26796e+07	1.47648e+07	3.749	1.91	0.0409926
	C7 H22 Cl N7 O4	303.143	2.455			2.20097e+07	1.19258e+07	9.60324e+06	6.45479e+06	1.46853e+06	3.60028e+07	4.45875e+07	1.79995e+07	5.17475e+07	2.52895e+07	3.749	1.91	0.0277222
		113.046	1.247			1.81574e+07	1.18479e+07	9.7358e+06	1.62987e+07	1.63937e+07	4.01042e+07	6.44987e+07	8.66125e+07	6.09832e+07	2.86782e+07	3.742	1.9	0.000849555
Pilocarpine	C11 H16 N2 O2	208.121	4.374			3.1554e+07	1.45512e+07	3.15619e+07	1.43606e+07	9.98264e+06	5.43958e+07	7.28596e+07	3.54636e+07	9.11592e+07	4.55305e+07	3.738	1.9	0.00512816
Heptadecanoic Acid	C17 H34 O2	292.24	26.287	61.1		2.26829e+06	5.83913e+06	2.02327e+06	1.55167e+06	2.17815e+06	7.82454e+06	8.14195e+06	1.04773e+07	9.41623e+06	3.84769e+06	3.738	1.9	0.00504981
N-oleoyl glycine	C20 H37 N O3	339.277	20.221			3.59895e+07	1.18413e+08	1.0934e+08	1.10316e+08	1.7214e+08	3.65105e+08	4.37727e+08	4.12186e+08	6.13239e+08	2.25451e+08	3.736	1.9	0.00320319
	C10 H22 N8 O5 S	366.145	4.908			5.08119e+06	2.41142e+06	1.26545e+06	2.03111e+06	443842	9.74199e+06	9.6054e+06	6.34742e+06	7.579e+06	4.33595e+06	3.731	1.9	0.0193478
Pilocarpine	C11 H16 N2 O2	208.121	6.745	80.4	C07474	498467	432952	389878	404273	482280	1.61487e+06	2.76639e+06	1.07374e+06	1.5321e+07	1.54088e+06	3.73	1.9	0.0194566
Arg-Phe-Ala	C18 H28 N6 O4	392.216	4.869			1.68731e+07	4.1109e+06	8.10421e+06	7.34172e+06	2.05591e+06	2.02425e+07	3.82422e+07	2.73822e+07	2.70603e+07	3.78568e+07	3.73	1.9	0.00873828
	C4 H2 N10	190.047	4.066			1.00353e+07	6.8921e+06	4.15364e+06	8.88192e+06	5.53484e+06	2.56979e+07	2.51708e+07	2.27632e+07	3.63938e+07	2.85139e+07	3.729	1.9	0.000249515
Myristoyl sarcosine	C17 H33 N O3	299.246	23.528			7.18442e+07	3.27118e+07	1.16884e+08	3.03278e+07	1.50176e+07	1.08049e+08	1.23743e+08	6.44107e+07	1.98931e+08	1.21859e+08	3.725	1.9	0.0438497
Eptapirone	C16 H23 N7 O2	345.19	5.355			8.30019e+06	4.16543e+06	2.63228e+06	3.05883e+06	1.43929e+06	1.13786e+07	8.02541e+06	1.06889e+07	1.38413e+07	1.26986e+07	3.72	1.9	0.0109165
	C25 H49 P S	412.33	25.064			782095	734597	385393	769686	622681	2.72908e+06	3.53313e+06	1.57884e+06	5.84798e+06	1.82146e+06	3.715	1.89	0.0013857
	C11 H23 P3 S2	312.045	1.749			4.4603e+06	3.25585e+06	4.48297e+06	2.39624e+06	1.05116e+06	9.02762e+06	1.20767e+07	4.21599e+06	1.51187e+07	1.23498e+07	3.709	1.89	0.00758894
Pyrrolam B	C8 H13 N O2	155.095	6.27			4.36932e+06	2.80554e+06	5.80055e+06	2.29029e+06	1.76094e+06	1.04042e+07	1.04462e+07	5.7267e+06	1.83528e+07	8.51962e+06	3.708	1.89	0.00372733
	C17 H34 N2 O4	330.252	7.12			1.57722e+06	980613	2.16041e+06	487927	174206	3.63e+06	3.37721e+06	1.78508e+06	7.67028e+06	6.01328e+06	3.702	1.89	0.0181762
Indoline	C8 H9 N	119.074	6.648			1.28659e+08	4.54527e+07	1.29854e+08	3.09766e+07	1.07166e+07	2.02932e+08	1.52703e+08	1.19968e+08	2.94434e+08	1.67908e+08	3.694	1.89	0.0458267
	C17 H42 N5 O16 P	603.239	5.007			7.76469e+06	4.80224e+06	2.72086e+06	2.73401e+06	2.17651e+06	1.00508e+07	1.29011e+07	1.00961e+07	1.89536e+07	8.37998e+06	3.693	1.88	0.00411529
	C22 H43 N S2	385.283	20.226			1.87773e+06	7.13102e+06	6.81247e+06	6.43722e+06	1.07668e+07	2.1481e+07	2.5724e+07	2.5124e+07	3.62253e+07	1.25538e+07	3.688	1.88	0.00578405
	C12 H30 N4 O3 S2	342.176	19.863			1.68618e+07	7.53515e+06	1.69531e+07	1.20494e+07	8.92418e+06	3.56733e+07	4.43589e+07	3.60013e+07	4.90235e+07	4.49037e+07	3.681	1.88	0.000714042
(1R,2R,5S,8R,10R,14R)-20-hydroxy-1,2,14,18,18-pentamethyl-17-oxo-8-(prop-1-en-2-yl)pentacyclo[11.8.0.0Â?,Âaâ°.0âµ,âa.0Âaâ´,Âaâa]henicosane-5-carboxylic acid	C30 H46 O4	452.329	7.668	88.2		1.87747e+07	3.51926e+06	1.65829e+06	3.33738e+06	2.42835e+06	1.57814e+07	1.69487e+07	9.75523e+06	1.22685e+07	1.16929e+07	3.676	1.88	0.0419248
YM-47515	C17 H29 N O4	311.209	15.307			6.00005e+06	3.4095e+06	3.33863e+06	1.95643e+06	1.43199e+06	1.16756e+07	1.35627e+07	9.88927e+06	1.55167e+07	1.22647e+07	3.674	1.88	0.00281234
	C21 H46 N5 O3 P	447.334	24.759			1.30599e+07	2.97546e+06	7.84095e+06	2.99629e+06	1.29351e+06	1.41517e+07	1.09873e+07	9.36595e+06	3.6371e+07	8.25445e+06	3.667	1.87	0.0452847
N-LAURYLSARCOSINE	C15 H31 N O2	257.235	21.589			6.04098e+06	4.10025e+06	7.89262e+06	6.95716e+06	4.8941e+06	2.20804e+07	2.58116e+07	9.3389e+06	2.47559e+07	1.15018e+07	3.655	1.87	0.00375265
	C9 H16 N2 O6 S2	312.045	1.249			5.67763e+06	3.77257e+06	5.3515e+06	2.47174e+06	959400	1.08656e+07	1.37888e+07	3.31601e+06	1.7382e+07	1.69365e+07	3.655	1.87	0.0230041
Palmitoleamide	C16 H31 N O	253.24	24.888			2.67925e+07	1.23571e+07	2.29591e+07	2.26916e+07	2.67165e+07	1.66838e+08	8.30509e+07	8.38424e+07	1.09793e+08	5.69977e+07	3.652	1.87	0.000239442
DPK	C15 H26 N4 O6	340.175	3.749	85.6		9.35244e+06	6.56232e+06	1.6174e+06	3.01908e+06	1.47697e+06	9.55101e+06	1.15271e+07	6.96829e+06	1.12391e+07	1.10219e+07	3.651	1.87	0.0414836
N-Acetylleucylleucine	C14 H26 N2 O4	286.189	11.283			3.71117e+06	3.58762e+06	4.83851e+06	1.71533e+06	1.19132e+06	1.30865e+07	1.97266e+07	8.25816e+06	2.21663e+07	1.03655e+07	3.648	1.87	0.00131232
	C17 H31 N2 O5 P	374.195	6.507			8.91755e+06	4.25993e+06	3.13447e+06	1.93246e+06	994991	1.14026e+07	1.23906e+07	7.09165e+06	1.27007e+07	1.09169e+07	3.638	1.86	0.0229334
lotrafiban	C23 H32 N4 O4	428.242	5.195			2.497e+06	973047	1.87166e+06	351816	136441	2.71456e+06	5.38204e+06	1.78768e+06	3.53479e+06	4.93363e+06	3.633	1.86	0.0444171
N-palmitoyl proline	C21 H39 N O3	353.293	25.317			663932	967345	521139	783600	1.18059e+06	4.08372e+06	2.84248e+06	1.36258e+06	9.73419e+06	1.32182e+06	3.627	1.86	0.021633
FENAMIC ACID	C13 H11 N O2	213.079	5.647			3.29111e+06	2.49398e+06	4.65584e+06	2.03512e+06	924041	9.04643e+06	9.39646e+06	2.28936e+06	1.23435e+07	5.1967e+06	3.627	1.86	0.0343975
octadec-9-ynoic acid	C18 H32 O2	262.23	22.905	97.6		6.50357e+06	7.16567e+06	2.15551e+07	4.20319e+06	4.47306e+06	2.34391e+07	2.18503e+07	2.35675e+07	1.00877e+08	3.62851e+07	3.624	1.86	0.00545528
N-(2E,9Z-hexadecadienoyl)-homoserine lactone	C20 H33 N O3	335.246	23.79			3.65063e+07	1.99766e+07	3.53501e+07	2.47035e+07	3.212e+07	1.16197e+08	1.13874e+08	1.25765e+08	2.53172e+08	7.53087e+07	3.618	1.86	0.000478798
N-(9Z-hexadecenoyl)-homoserine lactone	C20 H35 N O3	337.261	19.711			6.32696e+06	5.60048e+06	8.16201e+06	4.05592e+06	5.24211e+06	1.92395e+07	3.37286e+07	1.85361e+07	7.98864e+07	2.02356e+07	3.613	1.85	0.00251898
		78.0476	4.632			9.016e+06	6.30138e+06	2.16396e+07	5.11315e+06	3.49311e+06	1.827e+07	2.77352e+07	1.73918e+07	3.39896e+07	2.27112e+07	3.604	1.85	0.0169906
ethyl tumonoate A	C21 H37 N O4	367.272	22.219			1.01471e+07	7.15059e+06	1.19988e+07	1.09533e+07	1.22014e+07	2.36178e+07	3.94674e+07	5.02261e+07	4.71177e+07	2.73475e+07	3.603	1.85	0.000224965
7-Mercaptoheptanoylthreonine	C11 H21 N O4 S	263.119	7.686			4.39228e+06	3.08801e+06	5.51334e+06	1.51065e+06	344373	9.08045e+06	1.17521e+07	8.53441e+06	1.51327e+07	1.11254e+07	3.603	1.85	0.0281069
	C14 H19 N7 O3	333.153	4.071			1.36488e+07	6.45955e+06	5.00256e+06	3.66556e+06	1.05672e+06	1.8007e+07	1.89053e+07	1.13476e+07	1.98755e+07	1.35101e+07	3.6	1.85	0.035535
	C13 H16 N6 O4 S2	384.066	4.751			1.5218e+06	1.79662e+06	1.9311e+06	396935	107844	4.68025e+06	6.39302e+06	2.1915e+06	5.47863e+06	5.81947e+06	3.6	1.85	0.0282362
	C22 H34 N6 O3	430.267	15.906			2.335e+07	1.13681e+07	1.4183e+07	6.61667e+06	2.13273e+06	4.09153e+07	5.76815e+07	2.8256e+07	7.0934e+07	3.81215e+07	3.599	1.85	0.0129201
γ-L-glutamyl-L-leucine	C11 H20 N2 O5	260.137	4.565			9.92898e+07	4.25198e+07	3.21453e+07	3.62648e+07	1.31122e+07	1.30489e+08	1.50834e+08	7.73403e+07	1.41019e+08	9.89103e+07	3.598	1.85	0.0194282
Tegaserod	C16 H23 N5 O	301.189	12.368			1.86836e+07	1.56787e+07	2.27229e+07	1.14164e+07	8.56081e+06	5.64118e+07	8.97061e+07	4.50004e+07	8.56455e+07	5.51775e+07	3.598	1.85	0.000195312
	C15 H25 N3 O6	343.174	4.009			4.14773e+06	3.20507e+06	1.6582e+06	1.16204e+06	459055	4.4573e+06	8.52481e+06	2.56056e+06	6.3494e+06	5.96258e+06	3.596	1.85	0.0399678
dodecanamide	C12 H25 N O	199.194	21.038			1.10886e+09	7.94326e+08	1.90157e+09	1.43608e+09	1.31218e+09	5.36525e+09	4.70647e+09	2.65015e+09	5.10161e+09	2.58212e+09	3.587	1.84	0.000879861
Maremycin D2	C16 H17 N3 O4	315.122	5.411			6.1402e+06	2.22462e+06	1.86817e+06	1.68895e+06	616274	6.69832e+06	8.61168e+06	3.86337e+06	8.03053e+06	5.48327e+06	3.585	1.84	0.0284181
	C19 H41 N6 O5 P	464.289	18.175			1.1255e+07	6.04068e+06	7.80472e+06	3.14826e+06	780266	1.84668e+07	2.5559e+07	1.20041e+07	2.9634e+07	2.16455e+07	3.583	1.84	0.0246534
NP-016455	C11 H18 N2 O4	242.127	4.567	97.4		1.47791e+08	5.63386e+07	4.02998e+07	4.7182e+07	1.74668e+07	1.68917e+08	2.02465e+08	9.52236e+07	1.80945e+08	1.22038e+08	3.58	1.84	0.0277046
({N-[(2R)-2-Ammonio-3-(4-hydroxyphenyl)propanoyl]-L-valyl}amino)acetate	C16 H23 N3 O5	337.164	4.714			7.02471e+06	3.65226e+06	2.10094e+06	1.84396e+06	663747	7.5167e+06	8.81876e+06	4.28266e+06	9.04361e+06	5.46013e+06	3.578	1.84	0.0494017
Streptodiketopiperazine A	C13 H14 N2 O2	230.106	5.647			9.87161e+06	8.0469e+06	1.5061e+07	6.01075e+06	2.84643e+06	2.87595e+07	3.01272e+07	8.41757e+06	4.08869e+07	1.68434e+07	3.574	1.84	0.0233413
Semiplenamide G	C24 H45 N O4	411.334	25.147			1.29167e+07	3.19181e+06	3.36641e+06	4.43764e+06	2.82724e+06	1.22769e+07	1.19713e+07	1.06797e+07	2.86547e+07	6.06886e+06	3.556	1.83	0.026557
	C17 H32 N2 O3	312.241	8.642			1.35884e+06	1.2772e+06	1.97518e+06	466307	489990	5.37787e+06	4.41106e+06	2.1369e+06	9.36402e+06	4.5346e+06	3.55	1.83	0.00319313
4E,6E,10Z-Hexadecatrien-1-ol	C16 H28 O	236.214	24.261			3.94888e+06	1.62766e+06	1.07016e+06	2.18855e+06	2.86169e+06	8.16393e+06	5.5143e+06	7.80705e+06	7.67026e+06	7.75203e+06	3.542	1.82	0.00381081
	C11 H30 Cl N7 O4	359.205	5.483			8.86959e+06	4.63966e+06	3.20761e+06	2.76968e+06	858140	1.13384e+07	1.43221e+07	7.33741e+06	1.40468e+07	9.6075e+06	3.535	1.82	0.0280318
Oleoyl ethanolamide	C20 H39 N O2	325.298	25.987	99.2	C20792	3.31296e+07	9.11766e+07	5.14925e+07	7.58106e+07	1.10786e+08	3.67062e+08	1.77918e+08	2.67811e+08	4.60025e+08	6.48146e+07	3.533	1.82	0.022685
3097-B2	C14 H19 N O4	265.131	4.413			4.81772e+06	3.71697e+06	7.8319e+06	3.94621e+06	1.45538e+06	1.50305e+07	1.39411e+07	1.09603e+07	3.37867e+07	7.85155e+06	3.533	1.82	0.00690695
	C19 H40 N2 O2	328.309	7.585			3.3414e+06	1.98451e+06	3.30318e+06	551354	103575	6.81431e+06	7.00183e+06	3.12286e+06	1.12086e+07	7.07192e+06	3.528	1.82	0.0488175
	C17 H33 N O4 S	347.213	15.51			1.3774e+08	6.02727e+07	1.04928e+08	3.62775e+07	2.31873e+07	2.11983e+08	2.4303e+08	1.23503e+08	3.46731e+08	2.01905e+08	3.517	1.81	0.0134003
	C18 H36 N6 O4	400.28	4.998			1.01584e+07	6.67354e+06	1.08325e+07	5.88752e+06	5.4505e+06	8.4314e+06	2.91247e+07	2.34473e+07	3.02072e+07	1.96294e+07	3.513	1.81	0.00899564
	C13 H36 N7 O4 P	385.257	15.148			1.17794e+07	6.49932e+06	7.11474e+06	3.39731e+06	1.13906e+06	2.01834e+07	2.99659e+07	1.6741e+07	3.25483e+07	2.27892e+07	3.506	1.81	0.012766
	C12 H35 N8 O2 P S2	418.206	4.14			1.23076e+07	3.83588e+06	3.4964e+06	2.37449e+06	1.18398e+06	1.2201e+07	1.31515e+07	7.49201e+06	1.70231e+07	1.07515e+07	3.49	1.8	0.0287136
	C12 H23 N3 O4 S	305.141	2.408			1.42549e+08	5.0766e+07	8.06602e+07	3.33631e+07	5.4297e+07	1.8911e+08	1.41218e+08	3.71832e+08	1.27118e+08	3.3415e+08	3.483	1.8	0.00669854
Nitrosoxacin A	C16 H34 N2 O2	286.262	6.701			2.25202e+06	1.91415e+06	1.42494e+06	984742	834938	4.96022e+06	8.40304e+06	3.82777e+06	9.81104e+06	1.72133e+06	3.481	1.8	0.0116287
	C10 H28 Cl N7 O5	361.185	4.852			1.24111e+07	5.78893e+06	4.62254e+06	3.74466e+06	1.4373e+06	1.12868e+07	1.94962e+07	7.22803e+06	2.21251e+07	1.60632e+07	3.475	1.8	0.0268541
Mariline C	C11 H13 N O3	207.089	4.207			4.99376e+06	3.22444e+06	3.60467e+06	3.65409e+06	2.31621e+06	6.98642e+06	1.25145e+07	1.35155e+07	1.37198e+07	1.23372e+07	3.472	1.8	0.000136743
	C19 H26 N5 O4 P	419.172	6.339			7.81562e+06	3.157e+06	501511	4.60046e+06	2.74166e+06	1.0643e+07	1.30316e+07	1.09329e+07	1.32407e+07	8.14569e+06	3.463	1.79	0.0382161
Gly-Leu-Tyr	C17 H25 N3 O5	351.179	5.149			1.05636e+07	3.87143e+06	4.07661e+06	2.14711e+06	658281	1.34001e+07	1.45529e+07	7.09239e+06	1.42029e+07	9.80859e+06	3.461	1.79	0.0396933
Methyl Violet	C24 H27 N3	357.225	24.269	95.4		1.90568e+07	9.96222e+06	3.46955e+07	6.62015e+06	3.99522e+06	3.3485e+07	4.14448e+07	2.15551e+07	6.17319e+07	3.44645e+07	3.46	1.79	0.0330174
	C15 H20 N8 O3	360.164	3.759			1.5555e+07	8.5751e+06	5.27526e+06	4.03886e+06	1.60265e+06	1.82529e+07	2.02815e+07	1.16751e+07	2.12206e+07	1.19947e+07	3.46	1.79	0.0419789
Icaridin	C12 H23 N O3	229.167	13.746			1.31057e+08	1.32912e+08	2.33182e+08	1.05346e+08	8.90151e+07	4.5333e+08	5.20904e+08	3.02107e+08	7.14669e+08	3.65424e+08	3.459	1.79	0.000507369
N-lauroyl glycine	C14 H27 N O3	257.199	18.744			6.8983e+06	3.84983e+06	9.40073e+06	3.69827e+06	2.21195e+06	1.3313e+07	1.66868e+07	9.45483e+06	2.07728e+07	1.3015e+07	3.458	1.79	0.0076622
	C14 H17 N P2 S	293.057	4.599			1.2173e+06	1.07035e+06	708346	1.33853e+06	483356	2.95521e+06	3.59023e+06	3.69878e+06	4.63215e+06	4.99409e+06	3.456	1.79	0.000506531
1-Vinylimidazole	C5 H6 N2	94.0536	1.656	76.2		8.53717e+07	3.24171e+07	6.99243e+07	2.03649e+07	1.67756e+07	1.11635e+08	1.11699e+08	8.28093e+07	1.62836e+08	4.3268e+07	3.444	1.78	0.047534
	C14 H30 N7 O4 P	391.21	24.277			8.1068e+06	3.83542e+06	1.37971e+07	3.34295e+06	1.96535e+06	1.32052e+07	1.61348e+07	7.43055e+06	2.50316e+07	1.28552e+07	3.443	1.78	0.0372828
Lipoamide C	C17 H32 N2 O4	328.236	15.303			5.26555e+08	3.14858e+08	3.11931e+08	2.04892e+08	1.6113e+08	9.4647e+08	1.11433e+09	8.19735e+08	1.29943e+09	1.07314e+09	3.44	1.78	0.00163935
	C22 H43 N O5	401.314	21.791			4.4249e+06	2.88609e+06	5.72805e+06	1.73038e+06	630509	9.60964e+06	1.07376e+07	9.92722e+06	2.14434e+07	9.0615e+06	3.44	1.78	0.0125949
(1R,4aS,5R,8aS)-5-(5-hydroxy-3-methylpentyl)-1,4a-dimethyl-6-methylidene-decahydronaphthalene-1-carboxylic acid	C20 H34 O3	339.277	22.319	68.2		2.22525e+07	1.29321e+07	2.70247e+07	8.93283e+06	5.63157e+06	6.51736e+07	4.43509e+07	3.40774e+07	8.63951e+07	3.33926e+07	3.43	1.78	0.00668243
(2S)-2-[(2-{[(2S,3R,4R,5S,6R)-3-Acetamido-2,5-dihydroxy-6-(hydroxymethyl)tetrahydro-2H-pyran-4-yl]oxy}propyl)amino]propanoic acid	C14 H26 N2 O8	350.169	3.928			1.07867e+07	3.25745e+06	4.97461e+06	3.94805e+06	881008	6.44802e+06	1.35081e+07	1.67031e+07	1.0204e+07	1.94532e+07	3.421	1.77	0.0356039
	C21 H27 N S	325.186	19.877			3.63912e+07	2.36447e+07	4.43614e+07	1.97849e+07	1.6004e+07	8.08212e+07	8.34773e+07	6.03197e+07	1.02136e+08	6.69286e+07	3.418	1.77	0.00232814
	C17 H41 N6 O3 P	408.299	23.111			3.74477e+07	1.7391e+07	1.6571e+07	1.69234e+07	1.85493e+07	5.92609e+07	5.93391e+07	5.9963e+07	1.05895e+08	5.41258e+07	3.412	1.77	0.000416939
	C17 H41 N6 O4 P	424.294	23.108			9.2479e+06	4.04073e+06	3.51174e+06	2.19067e+06	1.49552e+06	1.19741e+07	1.29642e+07	1.03751e+07	2.0269e+07	1.09166e+07	3.41	1.77	0.00899849
N-oleoyl threonine	C22 H41 N O4	383.303	21.779			2.91207e+06	1.74298e+06	3.01241e+06	1.15082e+06	404963	5.36232e+06	7.38281e+06	5.94216e+06	1.17451e+07	5.48379e+06	3.409	1.77	0.010994
	C20 H26 N4 O6	418.185	5.249			2.99247e+06	2.29725e+06	1.27951e+06	1.05713e+06	688946	4.17221e+06	5.20626e+06	4.3555e+06	5.2515e+06	3.64304e+06	3.404	1.77	0.0112249
trans-3-Indoleacrylic acid	C11 H9 N O2	187.063	23.657	93.4		3.5719e+06	1.92821e+06	6.20922e+06	2.0171e+06	1.15735e+06	6.86329e+06	7.76305e+06	3.76697e+06	1.34814e+07	6.68562e+06	3.403	1.77	0.0208019
Sclerotiotide C	C24 H38 N4 O4	446.289	20.707			1.21404e+07	7.28777e+06	1.16062e+07	3.89742e+06	2.78462e+06	1.87048e+07	2.92484e+07	2.32449e+07	5.07718e+07	2.478e+07	3.4	1.77	0.00442137
	C14 H38 N7 O5 P	415.268	13.024			1.80333e+07	8.82034e+06	9.89798e+06	4.73811e+06	1.01449e+06	2.99843e+07	3.64061e+07	1.79146e+07	4.69552e+07	2.97573e+07	3.399	1.77	0.0259551
	C9 H15 P S	186.063	1.43			6.55854e+06	6.69287e+06	3.01287e+06	2.57597e+06	985856	1.02261e+07	1.21345e+07	6.16451e+06	1.38118e+07	8.76848e+06	3.394	1.76	0.0299467
	C24 H44 N2 O4	424.33	12.649			838738	1.6202e+06	3.35547e+06	2.86307e+06	3.64063e+06	8.67165e+06	9.6934e+06	1.54914e+07	1.44411e+07	9.71005e+06	3.391	1.76	0.00211865
Ambrettolic acid	C16 H30 O3	270.219	25.747			4.35759e+06	8.58941e+06	5.5789e+06	4.59429e+06	4.14252e+06	1.54274e+07	1.62623e+07	1.55611e+07	1.91475e+07	7.69802e+06	3.387	1.76	0.00142995
N-Acetylleucylleucine	C14 H26 N2 O4	286.189	1.194			1.61317e+08	1.06695e+08	6.01347e+07	6.55615e+07	6.061e+07	1.09644e+08	1.53576e+08	2.43416e+08	2.21786e+08	4.00835e+08	3.383	1.76	0.0159353
O-decanoyl-R-carnitine	C17 H33 N O4	315.241	22.397			5.96988e+06	3.05976e+06	4.04557e+06	1.97032e+06	744088	8.59609e+06	1.04619e+07	4.98489e+06	1.21036e+07	1.03482e+07	3.382	1.76	0.0209977
Eptapirone	C16 H23 N7 O2	345.19	4.988			2.54453e+06	1.99341e+06	1.66325e+06	1.04494e+06	304556	5.3445e+06	9.04279e+06	4.28291e+06	7.96241e+06	5.61684e+06	3.377	1.76	0.00945902
N-myristoyl glutamine	C19 H36 N2 O4	356.267	7.679			5.12128e+06	2.86776e+06	6.10038e+06	2.49071e+06	2.31792e+06	8.57979e+06	9.66331e+06	5.65321e+06	1.98425e+07	1.296e+07	3.37	1.75	0.0053793
	C33 H79 N8 O6 P3	776.532	19.82			1.28229e+07	3.30441e+06	7.21758e+06	1.19153e+07	8.87595e+06	2.94231e+07	2.98615e+07	3.79854e+07	1.19514e+07	3.93047e+07	3.364	1.75	0.00539411
	C15 H34 N5 O2 P	347.246	24.264			8.68223e+08	3.77504e+08	1.4078e+09	4.00608e+08	2.3129e+08	1.33827e+09	1.34457e+09	7.9869e+08	2.03036e+09	1.43026e+09	3.356	1.75	0.0442518
Akodionine	C10 H16 N2 O2	196.121	4.565			1.67354e+07	7.97747e+06	5.62081e+06	6.23705e+06	2.2169e+06	2.09709e+07	2.17006e+07	1.01506e+07	2.09201e+07	1.85465e+07	3.354	1.75	0.0302302
4-(3-(4-PIPERIDYL)PROPYL)-1-PIPERIDINEETHANOL	C15 H30 N2 O	254.236	7.65			2.61007e+06	2.08472e+06	4.11818e+06	736218	185326	8.45805e+06	6.99214e+06	5.03793e+06	1.33685e+07	6.46886e+06	3.354	1.75	0.0284002
5-Acetamidovalerate	C7 H13 N O3	159.09	5.171			3.30029e+06	1.66136e+06	4.00297e+06	1.13341e+06	943742	5.69289e+06	5.16604e+06	3.11614e+06	1.04643e+07	5.56438e+06	3.349	1.74	0.0161445
	C14 H19 N7 O S	333.136	4.319			2.37507e+06	1.08744e+06	1.25625e+06	801703	150292	3.63667e+06	4.51414e+06	2.4477e+06	6.37236e+06	2.91599e+06	3.344	1.74	0.0274233
	C21 H42 N2 O2	354.324	11.475			5.44574e+06	3.83786e+06	9.43274e+06	1.67708e+06	240290	1.93633e+07	1.28316e+07	9.57428e+06	2.6989e+07	8.57842e+06	3.343	1.74	0.0481035
N-stearoyl proline	C23 H43 N O3	381.324	24.248			1.94183e+07	7.82622e+06	2.16459e+07	7.09875e+06	2.66148e+06	2.34043e+07	2.61216e+07	2.14454e+07	4.68064e+07	2.87138e+07	3.338	1.74	0.038723
		146.057	3.824			6.87275e+06	8.34824e+06	1.85977e+07	7.90249e+06	4.92079e+06	2.63705e+07	1.72728e+07	2.67885e+07	4.16423e+07	1.12475e+07	3.337	1.74	0.0134544
	C26 H40 N6 O14	660.261	5.047			2.14546e+06	3.8997e+06	3.72736e+06	587172	308582	7.1497e+06	7.15106e+06	4.08703e+06	1.03895e+07	4.84413e+06	3.332	1.74	0.0394673
	C20 H31 N7 O2	401.252	12.957			9.17559e+06	6.23122e+06	6.70974e+06	3.0143e+06	1.03662e+06	1.67942e+07	2.26535e+07	1.28175e+07	2.81174e+07	2.07472e+07	3.33	1.74	0.01346
9,12-hexadecadienoic acid	C16 H28 O2	252.209	25.747			3.18436e+06	5.43628e+06	3.91892e+06	3.20564e+06	3.13297e+06	9.25817e+06	1.0664e+07	1.11177e+07	1.27952e+07	5.43892e+06	3.327	1.73	0.00114263
	C19 H36 N2 O6	388.257	15.366			2.34596e+07	1.32276e+07	1.40952e+07	5.8931e+06	1.36782e+06	4.00719e+07	5.17127e+07	2.91222e+07	6.40162e+07	4.39608e+07	3.323	1.73	0.0247043
(4E,6E,d14:2) sphingosine	C14 H27 N O2	241.204	8.339			1.96054e+06	3.04323e+06	2.33566e+06	1.8722e+06	1.60307e+06	6.50333e+06	6.39444e+06	5.91569e+06	8.75719e+06	7.08117e+06	3.317	1.73	5.15597e-05
	C21 H44 N5 O2 P	429.324	24.76			9.95234e+06	2.35568e+06	6.49349e+06	2.2825e+06	1.09022e+06	1.07556e+07	7.81366e+06	7.42281e+06	3.14978e+07	7.46278e+06	3.317	1.73	0.0425924
Lipoamide C	C17 H32 N2 O4	328.236	17.983			1.44146e+08	7.32283e+07	7.93194e+07	3.71385e+07	1.31881e+07	2.42725e+08	3.34403e+08	1.53581e+08	3.79141e+08	2.31782e+08	3.315	1.73	0.0145526
N-lauroyl glycine	C14 H27 N O3	257.199	14.429			9.19985e+07	8.18465e+07	1.70361e+08	4.73945e+07	1.29105e+07	3.10631e+08	2.70543e+08	1.22841e+08	4.54267e+08	2.02837e+08	3.305	1.72	0.0272716
		117.041	1.715			9.30798e+06	1.48525e+07	1.86669e+07	5.88977e+06	3.74021e+06	2.35623e+07	3.06578e+07	2.24486e+07	4.11579e+07	3.46955e+07	3.294	1.72	0.0117555
Alfentanil	C21 H32 N6 O3	416.252	14.626			1.62503e+07	7.36416e+06	8.51414e+06	4.54383e+06	1.57364e+06	2.42481e+07	3.25037e+07	1.59245e+07	3.91425e+07	2.06736e+07	3.293	1.72	0.0166632
16-methyl-6Z,9Z,12Z-heptadecatrienoic acid	C18 H30 O2	278.224	21.947			1.5934e+07	7.93746e+06	2.52217e+07	1.80294e+07	2.07318e+07	5.93711e+07	6.16756e+07	5.84339e+07	8.35379e+07	3.72282e+07	3.293	1.72	0.00109247
1,2-diacetylsphingosine	C22 H43 N O4	385.319	22.51			1.86223e+06	1.27287e+06	3.12983e+06	566194	223691	5.81326e+06	4.18741e+06	2.1116e+06	1.54909e+07	2.7353e+06	3.29	1.72	0.0302689
Flavipucine	C12 H15 N O4	237.1	4.204			3.53758e+07	1.98893e+07	3.70356e+07	2.78347e+07	1.62674e+07	4.52703e+07	9.15704e+07	7.02323e+07	9.94929e+07	1.09213e+08	3.29	1.72	0.00111841
	C5 H19 N6 O3 P	242.126	4.866			3.03541e+06	1.36162e+06	2.6445e+06	1.40564e+06	645488	4.62322e+06	5.76722e+06	3.61065e+06	6.36909e+06	4.04426e+06	3.289	1.72	0.0128549
	C14 H26 N8 O3	354.213	7.92			811209	1.1722e+06	2.21401e+06	949178	687037	3.69054e+06	3.11662e+06	1.67545e+06	5.53102e+06	3.02182e+06	3.283	1.72	0.00456582
	C17 H29 N5 O2 S2	399.175	4.445			2.93122e+06	1.70559e+06	1.60398e+06	1.03204e+06	1.15558e+06	6.54029e+06	5.99248e+06	4.70952e+06	3.40804e+06	5.26409e+06	3.282	1.71	0.00112544
	C23 H45 N6 O4 P	500.325	23.893			2.76167e+06	1.08066e+06	1.57887e+06	670915	191924	3.54322e+06	3.77315e+06	2.63011e+06	6.48927e+06	3.12221e+06	3.279	1.71	0.0321221
L-Isoleucine	C6 H13 N O2	131.095	24.253	97.2	C00407	1.35209e+08	6.56691e+07	1.78108e+08	6.22833e+07	3.69755e+07	2.11061e+08	2.15172e+08	1.38296e+08	2.94404e+08	2.36928e+08	3.277	1.71	0.0240303
	C18 H33 N2 O3 P S	388.196	4.748			1.0518e+07	2.22381e+06	3.36506e+06	2.75891e+06	966111	9.03466e+06	8.86654e+06	5.55369e+06	1.31231e+07	1.43321e+07	3.275	1.71	0.0322737
LMFA08020332	C16 H31 N O4	301.225	18.749			1.18583e+08	7.27041e+07	1.73424e+08	5.58038e+07	3.04267e+07	2.29072e+08	2.87365e+08	1.65615e+08	3.70413e+08	2.38025e+08	3.274	1.71	0.0130886
	C14 H37 N6 O5 P	400.257	17.01			2.15959e+07	9.2587e+06	1.10245e+07	5.67151e+06	1.77503e+06	3.02974e+07	4.207e+07	2.07555e+07	4.4692e+07	2.26472e+07	3.272	1.71	0.0235249
ethyl tumonoate A	C21 H37 N O4	367.272	24.018			1.64717e+07	5.31332e+06	6.03622e+06	5.09327e+06	3.33847e+06	1.87741e+07	1.31962e+07	1.57264e+07	2.78806e+07	1.73811e+07	3.271	1.71	0.011672
Obscuraminol A	C18 H31 N O	277.24	24.348			2.81466e+07	1.36842e+07	3.12466e+07	3.19806e+07	3.50886e+07	1.41098e+08	6.7898e+07	1.02133e+08	1.11551e+08	6.18911e+07	3.269	1.71	0.000670146
	C16 H31 N3 O4	329.231	10.029			9.61871e+06	8.38405e+06	7.1678e+06	7.24934e+06	6.69333e+06	2.34942e+07	3.7072e+07	2.19591e+07	4.20546e+07	2.36425e+07	3.261	1.71	0.000152101
Boc-L-Pro(4-oxo)	C10 H15 N O5	229.095	4.093			5.20678e+06	4.08297e+06	3.74014e+06	3.58209e+06	3.8278e+06	9.43909e+06	1.24635e+07	1.29083e+07	1.8227e+07	1.2469e+07	3.257	1.7	4.28849e-05
Abenquine B2	C14 H18 N2 O5	294.122	5.263			1.33198e+08	7.4991e+07	7.98473e+07	6.32072e+07	5.62322e+07	2.44234e+08	2.94568e+08	1.89644e+08	3.64572e+08	2.14611e+08	3.257	1.7	0.000293615
	C17 H34 N2 O4	330.252	6.886			1.85275e+06	954829	1.87707e+06	540441	300193	2.39906e+06	3.16666e+06	998212	3.7527e+06	3.10632e+06	3.253	1.7	0.0483587
Imiclopazine	C25 H32 Cl N5 O S	485.201	4.175			1.87657e+06	603087	1.13182e+06	699876	681753	2.27007e+06	2.30428e+06	2.06609e+06	3.79746e+06	1.67935e+06	3.244	1.7	0.00736532
	C21 H40 N5 O3 P	441.288	23.898			5.92425e+06	3.09267e+06	4.99245e+06	2.86756e+06	4.21582e+06	1.48594e+07	1.3659e+07	1.07865e+07	2.93749e+07	1.20172e+07	3.24	1.7	0.000466264
	C22 H33 N7 O3	443.263	13.342			7.3425e+06	4.33775e+06	5.1685e+06	2.61921e+06	830822	1.29746e+07	1.80759e+07	9.69387e+06	2.3795e+07	1.40343e+07	3.235	1.69	0.0120887
	C8 H26 N7 O6 P	347.169	3.749			7.50951e+06	3.64135e+06	2.29914e+06	2.47378e+06	937999	7.9898e+06	8.9297e+06	6.04629e+06	9.29491e+06	5.6907e+06	3.23	1.69	0.037826
	C19 H29 N7 O5	435.221	4.559			1.3526e+07	4.24482e+06	6.73282e+06	2.85799e+06	1.98017e+06	1.40401e+07	1.24768e+07	1.37949e+07	1.36951e+07	1.20581e+07	3.226	1.69	0.0357503
N,N'-1,3-Propanediylbis(2-propylpentanamide)	C19 H38 N2 O2	326.293	8.136			1.59008e+07	7.7625e+06	1.15326e+07	4.74956e+06	920233	2.50332e+07	2.86982e+07	1.917e+07	3.201e+07	2.07584e+07	3.225	1.69	0.042061
Chetocochliodin F	C16 H19 N3 O5	333.132	5.41			8.50295e+06	3.32172e+06	2.77214e+06	2.48378e+06	740765	8.93971e+06	1.33196e+07	5.75394e+06	1.31756e+07	8.92722e+06	3.225	1.69	0.0278826
	C16 H40 N9 O4 P S2	517.238	4.889			5.00867e+06	2.4847e+06	1.70369e+06	1.47834e+06	648944	5.49505e+06	5.68142e+06	3.84282e+06	8.93909e+06	5.45411e+06	3.225	1.69	0.0238373
	C15 H35 N6 P3 S	424.187	4.965			2.46755e+06	521349	3.12788e+06	1.93068e+06	484039	6.22532e+06	6.45971e+06	7.48996e+06	2.5443e+06	2.26003e+06	3.224	1.69	0.0361628
Lipoxamycin	C19 H36 N2 O5	372.262	17.49			1.84744e+07	8.88176e+06	9.61395e+06	3.89332e+06	1.12462e+06	2.86269e+07	3.65683e+07	1.99766e+07	4.21005e+07	2.68124e+07	3.223	1.69	0.0253684
N-lauroyl glycine	C14 H27 N O3	257.199	8.196			1.31439e+06	2.21673e+06	2.27224e+06	2.37396e+06	4.0344e+06	6.12137e+06	9.27983e+06	7.30926e+06	8.73071e+06	3.08801e+06	3.217	1.69	0.00472525
		132.052	1.113			4.54654e+07	7.61404e+07	1.90222e+07	2.54804e+07	1.94381e+07	8.16197e+07	9.51137e+07	6.16286e+07	8.40344e+07	5.37479e+07	3.203	1.68	0.0320787
	C17 H36 N5 O4 P	405.249	24.838			6.37316e+06	3.11888e+06	3.29489e+06	4.18225e+06	5.13569e+06	1.3376e+07	9.98719e+06	1.38444e+07	1.95165e+07	5.84622e+06	3.198	1.68	0.00442902
Gaburedin F	C10 H18 N2 O5 S	278.093	4.179			4.2698e+07	2.35396e+07	2.74803e+07	2.10255e+07	1.18601e+07	6.64447e+07	8.60848e+07	5.66972e+07	1.14327e+08	7.52376e+07	3.196	1.68	0.00201174
AI-77-B	C20 H28 N2 O8	424.184	5.482			5.03864e+06	1.20954e+06	1.50971e+06	1.55571e+06	420241	3.03806e+06	6.28896e+06	4.2501e+06	4.82346e+06	5.43649e+06	3.195	1.68	0.038425
Lipoamide B	C16 H30 N2 O4	314.22	1.722			2.79415e+07	2.08519e+07	1.66658e+07	8.20052e+06	8.45186e+06	5.06266e+07	4.7236e+07	7.00107e+07	5.31706e+07	1.10217e+08	3.19	1.67	0.00167345
Biotin sulfoxide	C10 H16 N2 O4 S	260.083	4.179			3.72461e+06	2.19993e+06	2.93377e+06	1.72707e+06	970542	6.68088e+06	8.5753e+06	5.38978e+06	1.29339e+07	7.0173e+06	3.19	1.67	0.00224275
Streptcytosine M	C16 H23 N3 O4	321.169	5.618			8.10373e+06	8.1364e+06	3.79652e+06	2.81887e+06	731835	1.03992e+07	1.49191e+07	1.09529e+07	1.56051e+07	1.21058e+07	3.189	1.67	0.04261
Luteoride E	C17 H20 N2 O3	300.147	5.225			1.61685e+06	1.07904e+06	2.44686e+06	800405	160428	3.44052e+06	4.01797e+06	1.48721e+06	5.67807e+06	3.1095e+06	3.188	1.67	0.0476515
N-palmitoyl threonine	C20 H39 N O4	357.288	22.322			2.90637e+07	1.76927e+07	3.61327e+07	1.19024e+07	6.84592e+06	5.6341e+07	5.9261e+07	4.59403e+07	1.16517e+08	4.51232e+07	3.184	1.67	0.010005
N-Acetyl-L-histidine	C8 H11 N3 O3	197.079	1.195			1.83079e+07	1.66799e+07	3.23271e+07	1.16656e+07	5.38045e+06	5.70527e+07	5.3099e+07	1.69222e+07	9.03368e+07	4.35863e+07	3.183	1.67	0.0212162
Phenethylamine	C8 H11 N	121.089	4.634	94.1	C05332	9.41231e+07	7.51281e+07	2.21839e+08	6.3259e+07	5.62697e+07	1.84955e+08	2.84256e+08	1.84121e+08	3.29461e+08	2.38888e+08	3.18	1.67	0.0118431
Lauroylsarcosine	C15 H29 N O3	271.215	21.531			8.66326e+08	4.66163e+08	9.40438e+08	4.15528e+08	3.41563e+08	1.48256e+09	1.92878e+09	1.23048e+09	2.51878e+09	1.35444e+09	3.18	1.67	0.0030717
NSC 622050	C16 H31 N O3	285.23	21.8			7.93536e+07	5.495e+07	1.52705e+08	4.22307e+07	2.82829e+07	1.55941e+08	1.74076e+08	1.09148e+08	2.85339e+08	1.75176e+08	3.168	1.66	0.0178483
NP-016455	C11 H18 N2 O4	242.127	4.372	93.4		9.47395e+07	4.55174e+07	2.40908e+07	2.9395e+07	1.31827e+07	6.68329e+07	1.27374e+08	6.45905e+07	9.69678e+07	9.29499e+07	3.162	1.66	0.0400677
N-(9Z-hexadecenoyl)-homoserine lactone	C20 H35 N O3	337.262	24.839			1.10602e+08	4.82728e+07	5.82477e+07	7.48044e+07	9.51431e+07	2.36297e+08	1.96575e+08	2.57547e+08	4.2902e+08	1.13065e+08	3.159	1.66	0.00369677
Palmitoleoyl-EA	C18 H35 N O2	297.267	24.048			4.54502e+07	6.6753e+07	6.50298e+07	5.0562e+07	6.56404e+07	2.87251e+08	2.04816e+08	1.80967e+08	3.57933e+08	1.40597e+08	3.15	1.66	0.000415431
	C14 H34 N5 O P	319.251	24.211			9.82862e+06	4.745e+06	6.06566e+06	3.83144e+06	850871	1.73003e+07	1.49461e+07	1.09078e+07	1.98173e+07	1.13892e+07	3.15	1.66	0.031426
	C17 H32 N2 O2	296.246	9.21			4.23669e+06	3.4755e+06	9.38987e+06	2.97602e+06	2.28887e+06	1.09351e+07	1.05233e+07	7.82562e+06	2.27215e+07	1.2725e+07	3.146	1.65	0.00629727
N-oleoyl glycine	C20 H37 N O3	339.277	24.342			2.27429e+07	1.38641e+07	2.06103e+07	7.04938e+06	3.04723e+06	7.07755e+07	4.35629e+07	2.67923e+07	1.07462e+08	3.84336e+07	3.142	1.65	0.0104857
	C19 H27 N3 P2	359.169	7.286			1.60875e+06	757556	1.10084e+06	232207	105036	2.02569e+06	2.37668e+06	1.09907e+06	4.35412e+06	2.84552e+06	3.137	1.65	0.0372493
N-(dodecanoyl)-homoserine lactone	C16 H29 N O3	283.215	11.248			5.23804e+06	9.3243e+06	1.4482e+07	1.18161e+07	2.3133e+07	3.26996e+07	3.69967e+07	5.02369e+07	3.97383e+07	2.62847e+07	3.131	1.65	0.00611816
	C24 H32 N6 O	420.262	18.513			3.97222e+07	2.26065e+07	3.80422e+07	1.28497e+07	2.55069e+06	6.64998e+07	8.54946e+07	4.54469e+07	1.05919e+08	7.07277e+07	3.129	1.65	0.0396949
PGE2alpha dimethyl amine	C22 H41 N O3	367.308	25.968			4.15601e+06	6.1919e+06	3.63321e+06	3.47355e+06	1.84237e+06	2.17598e+07	9.41272e+06	1.13574e+07	2.813e+07	2.98828e+06	3.126	1.64	0.0389394
1-Vinylimidazole	C5 H6 N2	94.0536	1.22	81.1		9.39327e+07	4.28706e+07	7.09602e+07	3.14758e+07	2.98311e+07	1.5878e+08	1.34026e+08	6.87604e+07	1.74124e+08	5.4463e+07	3.126	1.64	0.0414582
		76.032	4.632			1.49193e+07	1.17767e+07	3.19214e+07	8.75132e+06	5.68841e+06	2.78337e+07	4.15032e+07	2.77073e+07	4.90386e+07	3.67372e+07	3.119	1.64	0.0172291
N-(3-oxo-hexadecanoyl)-homoserine lactone	C20 H35 N O4	353.256	21.247			1.10502e+07	1.12795e+07	2.10599e+07	1.77672e+07	2.36941e+07	4.81933e+07	5.53037e+07	9.28531e+07	8.43965e+07	4.27309e+07	3.113	1.64	0.000299566
Fern-9(11)-en-3,19-dione	C30 H46 O2	438.349	25.946			416219	2.01425e+06	1.08486e+06	2.40491e+06	2.3464e+06	9.24112e+06	5.11546e+06	1.1543e+07	6.26533e+06	3.32143e+06	3.111	1.64	0.00638995
Caprolactin A	C15 H28 N2 O2	268.215	7.598			781989	875757	2.02846e+06	667654	501731	2.43243e+06	2.46688e+06	1.59299e+06	4.93091e+06	2.23205e+06	3.111	1.64	0.00727085
	C10 H28 N5 O3 P	297.194	12.319			2.75804e+06	3.75531e+06	6.69223e+06	4.45562e+06	7.42343e+06	1.12274e+07	1.42514e+07	2.56862e+07	1.38026e+07	1.06351e+07	3.098	1.63	0.00181011
Boc-Gln-Oh	C10 H18 N2 O5	246.121	4.091			1.1138e+08	7.95131e+07	7.47626e+07	5.89965e+07	5.52539e+07	2.22053e+08	2.8701e+08	1.85373e+08	3.87954e+08	2.31535e+08	3.097	1.63	0.000114071
N-oleoyl L-serine	C21 H39 N O4	369.287	21.224			7.91147e+06	4.25072e+06	6.42563e+06	4.60137e+06	6.73991e+06	2.28576e+07	1.64817e+07	1.60523e+07	4.29435e+07	1.98919e+07	3.096	1.63	0.000466036
(2S,4S)-Pinnatanine	C10 H16 N2 O5	244.106	1.217			9.11442e+07	4.28468e+07	4.90695e+07	3.7962e+07	2.42038e+07	1.22175e+08	1.33623e+08	6.64347e+07	1.32669e+08	1.45459e+08	3.096	1.63	0.00763548
	C10 H23 N10 O2 P	346.174	6.008			3.18106e+06	2.69706e+06	4.29914e+06	1.35528e+06	206578	6.76826e+06	9.60787e+06	4.81649e+06	1.0386e+07	8.34612e+06	3.095	1.63	0.0425421
Boc-Asn-Oh	C9 H16 N2 O5	232.106	2.145			1.61159e+07	1.79962e+07	1.88423e+07	1.33747e+07	3.81998e+06	4.98434e+07	6.09291e+07	2.71296e+07	4.26981e+07	5.92887e+07	3.093	1.63	0.00765662
DL-β-Leucine	C6 H13 N O2	131.093	6.268	92.5		3.4887e+07	2.35408e+07	4.73448e+07	1.7456e+07	1.12283e+07	7.54356e+07	7.27788e+07	4.28694e+07	1.58171e+08	7.13418e+07	3.092	1.63	0.00772981
	C11 H30 Cl N7 O4	359.205	5.664			2.85072e+06	2.08352e+06	1.93204e+06	1.25883e+06	473363	5.97214e+06	7.91453e+06	3.20268e+06	8.24806e+06	5.25276e+06	3.091	1.63	0.00780759
DCG-IV	C7 H9 N O6	203.042	1.28			1.76772e+06	2.5286e+06	3.02856e+06	2.15068e+06	1.2045e+06	7.99531e+06	5.93695e+06	6.64273e+06	8.98221e+06	4.73224e+06	3.089	1.63	0.000430332
Acetic acid, [1,4,7,10-tetraazacyclododecane-1,7-diyl]bis	C12 H24 N4 O4	288.18	4.283			4.06096e+06	3.40207e+06	3.12839e+06	2.75684e+06	2.31258e+06	9.65713e+06	1.27396e+07	1.16447e+07	7.26898e+06	5.55333e+06	3.087	1.63	0.000697089
12S-hydroxy-16-heptadecynoic acid	C17 H30 O3	282.219	25.054			2.6733e+07	3.24184e+07	3.78403e+07	2.486e+07	2.25159e+07	7.15575e+07	8.24776e+07	9.15494e+07	1.19311e+08	4.8958e+07	3.085	1.63	0.000668309
	C20 H32 N6 O	372.262	17.903			3.78495e+07	1.89177e+07	1.92756e+07	8.94464e+06	1.8112e+06	5.58913e+07	7.58586e+07	4.28889e+07	9.26011e+07	5.83312e+07	3.083	1.62	0.0299489
	C15 H29 N O2	255.22	22.558			1.47485e+07	2.48851e+07	4.55514e+07	2.71569e+07	1.89786e+07	8.35954e+07	7.17836e+07	7.66229e+07	1.1165e+08	5.42907e+07	3.079	1.62	0.00147835
	C8 H27 N9 O5 S	361.185	5.097			4.51395e+06	5.38309e+06	4.89684e+06	2.54748e+06	1.35613e+06	1.38496e+07	1.60657e+07	1.17002e+07	1.38807e+07	1.51562e+07	3.075	1.62	0.00442151
N-[1,2-dihydroxy-2-(prop-2-enoylamino)ethyl]prop-2-enamide	C8 H12 N2 O4	200.079	1.186			1.15229e+07	9.95091e+06	6.69548e+06	5.9893e+06	3.26062e+06	2.05345e+07	2.38173e+07	9.78324e+06	2.28927e+07	1.58523e+07	3.067	1.62	0.00986952
N-oleoyl proline	C23 H41 N O3	379.308	25.069			2.14252e+06	1.13264e+06	1.36357e+06	888782	838241	3.46864e+06	5.96331e+06	2.28352e+06	1.67505e+07	1.51039e+06	3.062	1.61	0.0383135
Cylindrocarpyridone B	C14 H21 N O5	283.142	4.586			2.52076e+06	2.39359e+06	2.5195e+06	3.37142e+06	5.82778e+06	3.03919e+06	6.55898e+06	7.71493e+06	1.16675e+07	1.21742e+07	3.061	1.61	0.0250355
Parguerene	C26 H39 N O2	397.298	25.086			9.70713e+06	4.06466e+06	4.6948e+06	4.42435e+06	1.58723e+06	2.06172e+07	1.20016e+07	1.35247e+07	2.75123e+07	5.03701e+06	3.057	1.61	0.0205944
	C10 H20 N6 O S	272.143	6.237			3.39023e+06	2.81765e+06	3.92123e+06	2.24462e+06	1.61407e+06	6.34777e+06	8.61092e+06	1.08973e+07	1.27706e+07	4.54464e+06	3.056	1.61	0.00200343
12-amino-dodecanoic acid	C12 H25 N O2	215.188	12.464			2.03122e+08	5.49872e+08	5.16788e+08	3.98274e+08	4.5173e+08	1.37763e+09	1.52967e+09	9.00173e+08	1.74347e+09	7.2204e+08	3.05	1.61	0.00218689
	C17 H34 N2 O2	298.262	6.954			4.77924e+07	3.5915e+07	3.68269e+07	1.79647e+07	5.56411e+06	1.03059e+08	1.62864e+08	1.08976e+08	1.47997e+08	9.36752e+07	3.034	1.6	0.0110079
	C9 H27 N9 O6 S	389.18	4.877			1.57659e+07	7.00927e+06	4.76733e+06	5.80643e+06	2.47359e+06	1.76104e+07	1.77772e+07	1.13622e+07	2.04408e+07	9.40032e+06	3.033	1.6	0.0368277
N-palmitoyl alanine	C19 H37 N O3	327.277	26.284			2.51211e+06	9.39382e+06	4.00485e+06	3.64671e+06	4.40758e+06	1.21361e+07	1.134e+07	1.55076e+07	1.69764e+07	4.13499e+06	3.03	1.6	0.0250306
9,12,15-Octadecatrien-1-ol	C18 H32 O	264.245	27.011			1.24179e+07	2.07909e+07	2.50568e+07	8.69499e+06	6.32857e+06	5.31043e+07	3.13183e+07	3.76012e+07	6.298e+07	2.37071e+07	3.028	1.6	0.00904207
	C17 H34 N2 O3	314.257	9.211			8.82969e+07	7.45226e+07	1.94991e+08	6.47506e+07	4.865e+07	2.25618e+08	2.10615e+08	1.66045e+08	4.63326e+08	2.64266e+08	3.028	1.6	0.00633302
3-[6-(2-methylpropyl)-2-oxo-1H-pyrazin-3-yl]propanamide	C11 H17 N3 O2	223.132	4.295			1.19682e+06	777966	1.44775e+06	2.60303e+06	2.99035e+06	4.36388e+06	4.38106e+06	1.86227e+07	1.48678e+07	3.12584e+06	3.026	1.6	0.0119644
	C17 H23 N7 O3	373.185	7.892			1.5018e+07	6.80786e+06	7.0633e+06	3.39787e+06	1.02175e+06	1.81183e+07	2.05897e+07	1.25608e+07	3.68603e+07	2.52095e+07	3.024	1.6	0.0262695
N-(dodecanoyl)-homoserine lactone	C16 H29 N O3	283.215	16.79			8.30353e+06	5.9558e+06	8.94359e+06	2.36166e+06	718283	1.77522e+07	2.35495e+07	1.15492e+07	3.0914e+07	1.79226e+07	3.009	1.59	0.0232846
	C18 H40 N5 O P	373.298	25.536			6.74853e+06	4.57883e+06	5.11848e+06	5.04524e+06	2.49085e+06	2.74584e+07	1.5164e+07	1.47829e+07	2.81798e+07	8.85609e+06	3.006	1.59	0.00149302
2,6-Dimethylquinoline	C11 H11 N	157.089	5.647			4.77241e+06	4.31684e+06	6.54324e+06	3.06595e+06	1.81643e+06	1.29249e+07	1.38455e+07	4.31942e+06	1.80615e+07	8.12177e+06	2.994	1.58	0.0171432
		75.0327	19.884			3.57679e+07	2.88579e+07	4.31492e+07	2.68634e+07	2.48772e+07	8.62152e+07	9.62073e+07	6.23871e+07	1.36583e+08	7.13275e+07	2.988	1.58	0.00039491
		89.0482	24.267			1.27812e+07	8.07216e+06	9.43789e+06	7.7766e+06	6.1992e+06	2.40938e+07	2.4028e+07	2.73675e+07	3.06231e+07	2.18873e+07	2.985	1.58	0.000219033
Ethyl 4-acetamido-5-amino-3-(3-pentanyloxy)-1-cyclohexene-1-carboxylate	C16 H28 N2 O4	312.205	10.015			3.13163e+06	3.54143e+06	2.09637e+06	2.73748e+06	1.84796e+06	8.16786e+06	1.57945e+07	7.18484e+06	1.36157e+07	6.98509e+06	2.984	1.58	0.000343568
2,5-undecadienal	C11 H18 O	166.136	20.659			9.81957e+06	9.41025e+06	1.18668e+07	9.08931e+06	1.10913e+07	2.92776e+07	3.0269e+07	2.1496e+07	3.40751e+07	2.60259e+07	2.982	1.58	1.47472e-05
N,N'-1,3-Propanediylbis(2-propylpentanamide)	C19 H38 N2 O2	326.293	7.923			1.80529e+07	1.06382e+07	1.69164e+07	3.6799e+06	607803	3.07321e+07	4.10224e+07	2.81157e+07	4.46316e+07	3.17142e+07	2.981	1.58	0.0491499
8-methylamino-N6-cyclopentyladenosine	C16 H24 N6 O4	364.184	3.889			9.07044e+06	2.28004e+06	2.67833e+06	2.65695e+06	1.03537e+06	4.24434e+06	8.22572e+06	7.91443e+06	6.15958e+06	2.38388e+07	2.979	1.57	0.0393417
4-{[(2-Amino-4-oxo-1,4,5,6,7,8-hexahydro-6-pteridinyl)methyl]amino}benzoic acid	C14 H16 N6 O3	316.127	4.229			3.80182e+06	1.87248e+06	2.26186e+06	1.55336e+06	819767	5.57891e+06	6.21651e+06	2.74413e+06	7.04076e+06	4.15228e+06	2.979	1.58	0.0139196
Palmitoleoyl-EA	C18 H35 N O2	297.267	24.193			2.03678e+07	3.71626e+07	3.63058e+07	2.73889e+07	4.50738e+07	1.71318e+08	1.08051e+08	1.01198e+08	1.46529e+08	5.7848e+07	2.976	1.57	0.000964806
16-methyl-octadeca-5Z,9Z,12Z-trienoic acid	C19 H32 O2	292.24	25.189			1.84262e+07	1.08472e+07	1.04764e+07	4.33364e+06	5.0344e+06	2.63324e+07	2.42448e+07	3.89181e+07	4.75421e+07	3.11643e+07	2.975	1.57	0.00456858
	C16 H23 P S	278.126	6.368			5.05233e+06	2.26909e+06	3.91022e+06	1.98089e+06	823215	6.74755e+06	8.51301e+06	4.10098e+06	9.3963e+06	6.03369e+06	2.974	1.57	0.025678
3-Methoxy-1-methyl-4(1H)-quinolone	C11 H11 N O2	189.079	6.672			3.3924e+06	2.39556e+06	4.44447e+06	1.47939e+06	822259	7.26303e+06	7.12138e+06	3.97206e+06	1.38664e+07	6.67641e+06	2.973	1.57	0.0121374
	C7 H24 N6 O2 P2 S	318.117	1.184			6.59879e+06	2.83221e+06	2.43984e+06	2.43571e+06	855018	6.74737e+06	9.15673e+06	4.94039e+06	9.64832e+06	7.2162e+06	2.958	1.56	0.0255992
Pantheric Acid C	C11 H18 O4	214.12	8.005			3.74813e+06	4.13473e+06	3.38968e+06	3.2033e+06	3.42734e+06	1.41961e+07	1.39176e+07	9.1499e+06	1.0078e+07	1.01295e+07	2.955	1.56	3.33278e-05
Elaiomycin	C13 H26 N2 O3	258.194	6.846			3.50072e+06	2.07331e+06	2.76652e+06	1.86194e+06	1.76582e+06	4.77259e+06	6.44148e+06	3.23239e+06	9.98117e+06	6.11759e+06	2.951	1.56	0.00497312
	C14 H29 N3 O4	303.216	4.025			2.05944e+07	1.21821e+07	1.98275e+07	7.07659e+06	1.33293e+06	3.59496e+07	5.33101e+07	2.35568e+07	4.53303e+07	2.8304e+07	2.951	1.56	0.0454331
Boc-Gln-ONp	C16 H21 N3 O7	367.138	4.302			3.82496e+06	2.723e+06	1.61592e+06	2.02124e+06	517968	5.96076e+06	1.08123e+07	2.2042e+06	6.97894e+06	3.58598e+06	2.949	1.56	0.0427779
		131.057	1.403			5.52938e+06	4.9386e+06	8.16613e+06	4.39147e+06	3.27278e+06	1.67453e+07	1.45434e+07	7.57985e+06	2.2193e+07	9.2919e+06	2.945	1.56	0.00532878
	C12 H21 P S	228.11	4.093			5.59875e+06	2.14486e+06	1.7037e+06	2.00013e+06	1.39727e+06	4.64769e+06	1.36961e+07	5.78461e+06	1.58553e+07	5.8844e+06	2.942	1.56	0.00612927
N-butanoyl-l-homoserine lactone	C8 H13 N O3	171.09	2.165			4.64627e+06	4.24183e+06	5.01119e+06	4.36648e+06	5.51109e+06	6.78386e+06	1.88167e+07	1.59166e+07	1.36453e+07	6.53897e+06	2.937	1.55	0.0155923
	C13 H27 N3 O4	289.2	3.752			2.33928e+06	2.26631e+06	1.54345e+06	957784	913413	6.96279e+06	8.17628e+06	3.02181e+06	4.52423e+06	1.26344e+06	2.931	1.55	0.042
	C17 H37 N2 O4 P S	396.223	15.291			1.30518e+07	7.70115e+06	7.56753e+06	5.12051e+06	4.03748e+06	2.01938e+07	2.21562e+07	1.75165e+07	2.34848e+07	2.23499e+07	2.928	1.55	0.00401608
Pyrrolam B	C8 H13 N O2	155.095	6.086			2.99748e+06	1.78574e+06	3.88109e+06	1.46032e+06	1.15754e+06	5.42818e+06	5.22722e+06	2.74561e+06	9.22356e+06	3.9173e+06	2.927	1.55	0.0198031
Sesbanimide A	C15 H21 N O7	327.132	4.211			1.56896e+08	8.43483e+07	1.09441e+08	1.41369e+08	9.05222e+07	1.96903e+08	3.20235e+08	3.18933e+08	3.29563e+08	3.23335e+08	2.926	1.55	0.000349165
2,2,6,6-Tetramethyl-4-piperidinyl heptanoate	C16 H31 N O2	269.235	9.708			2.5343e+06	4.36816e+06	4.06399e+06	3.79792e+06	3.75635e+06	1.32387e+07	1.13715e+07	1.06602e+07	1.11125e+07	8.35679e+06	2.926	1.55	2.52172e-05
Pafenolol	C18 H31 N3 O3	337.236	9.436			7.94078e+07	5.78969e+07	1.94964e+08	5.75456e+07	3.81227e+07	1.69306e+08	2.01228e+08	1.11372e+08	3.47275e+08	1.66329e+08	2.924	1.55	0.0245787
		89.0483	21.53			4.2799e+07	2.62699e+07	4.70831e+07	2.38057e+07	1.92017e+07	7.67271e+07	1.02857e+08	6.48259e+07	1.36751e+08	7.09971e+07	2.921	1.55	0.00152402
2'-Deoxy-5,6-dihydrouridine	C9 H14 N2 O5	230.09	1.195			9.95911e+07	3.28573e+07	3.91417e+07	2.94029e+07	1.05806e+07	9.43827e+07	9.5935e+07	5.33757e+07	1.38487e+08	1.06669e+08	2.92	1.55	0.041042
	C16 H29 N3 O S2	343.174	5.082			1.32483e+07	6.017e+06	4.44232e+06	3.80235e+06	1.77909e+06	1.32754e+07	1.58811e+07	8.28387e+06	1.29182e+07	1.21228e+07	2.908	1.54	0.0410932
	C31 H26 O5	478.18	4.244			1.84785e+06	3.93362e+06	1.48683e+06	2.61482e+06	1.50344e+06	4.03466e+06	7.68658e+06	5.37302e+06	3.65852e+06	7.09822e+06	2.908	1.54	0.00500474
	C20 H38 N4 O2 S2	430.243	5.566			1.15548e+07	6.18833e+06	2.04984e+06	4.1387e+06	1.02551e+06	1.20254e+07	1.19435e+07	9.67785e+06	1.5117e+07	1.253e+07	2.906	1.54	0.0446859
O-octanoyl-R-carnitine	C15 H29 N O4	287.209	17.129			1.17315e+08	6.49929e+07	8.82098e+07	3.81668e+07	1.72559e+07	1.57136e+08	1.91223e+08	8.3473e+07	2.06399e+08	1.88478e+08	2.9	1.54	0.0298864
3-hydroxy-N-(1-hydroxy-3-methylpentan-2-yl)-5-oxohexanamide	C12 H23 N O4	245.162	7.507			1.53664e+06	2.04215e+06	4.46927e+06	1.05044e+06	424444	2.9361e+06	4.04494e+06	4.79246e+06	5.48509e+06	4.45223e+06	2.897	1.53	0.0471917
	C20 H38 N2 O6	402.273	16.256			2.08847e+07	1.38127e+07	1.55528e+07	5.81476e+06	1.44272e+06	3.87902e+07	4.85799e+07	2.95528e+07	6.93872e+07	3.99848e+07	2.895	1.53	0.0237818
	C6 H14 N9 P	243.111	5			1.01818e+07	6.57158e+06	6.65331e+06	5.1512e+06	5.31077e+06	1.80165e+07	2.12692e+07	1.89131e+07	2.81079e+07	1.72512e+07	2.878	1.53	0.000108646
Heptanoylcarnitine	C14 H27 N O4	273.194	12.938			1.4211e+07	1.2727e+07	2.134e+07	8.39598e+06	4.97626e+06	3.6586e+07	4.31769e+07	2.66594e+07	5.90267e+07	3.5882e+07	2.875	1.52	0.00396799
	C15 H21 N S2	279.11	4.21			7.8694e+06	4.56611e+06	6.26739e+06	5.95498e+06	3.33244e+06	1.12195e+07	1.71154e+07	1.61164e+07	1.72274e+07	1.8961e+07	2.874	1.52	0.00051356
	C7 H16 N5 O3 P	249.1	4.208			3.89744e+06	1.9154e+06	2.3268e+06	3.04822e+06	1.32445e+06	4.88913e+06	6.65241e+06	6.68483e+06	8.04371e+06	7.63666e+06	2.873	1.52	0.00262497
4-amino-4-cyano-butanoic acid	C5 H8 N2 O2	128.059	15.301			1.41469e+07	9.09788e+06	9.86214e+06	7.91015e+06	6.24602e+06	2.33204e+07	2.60923e+07	2.02113e+07	3.1573e+07	2.63129e+07	2.868	1.52	0.000492451
		85.0897	24.25			7.98299e+07	4.59601e+07	1.12458e+08	4.47309e+07	3.07783e+07	1.21346e+08	1.32789e+08	8.78654e+07	1.66284e+08	1.31627e+08	2.864	1.52	0.0214845
	C15 H33 N8 O9 P	500.212	5.336			3.36778e+06	1.24957e+06	913613	608903	304329	2.24918e+06	4.28075e+06	2.59096e+06	4.46755e+06	2.61352e+06	2.861	1.52	0.0360259
Indoline	C8 H9 N	119.074	24.263			1.81043e+08	8.47372e+07	2.60674e+08	9.56561e+07	5.40424e+07	2.72102e+08	2.73235e+08	1.75104e+08	3.81042e+08	2.94535e+08	2.856	1.51	0.0351755
Glycine	C2 H5 N O2	75.0307	1.724	99.5	C00037	6.46163e+06	8.19604e+06	7.10348e+06	8.78412e+06	7.40646e+06	1.56071e+07	2.11281e+07	9.27644e+06	2.81981e+07	2.99976e+07	2.853	1.51	0.0106908
Sporovexin C	C15 H19 N O6	309.121	4.215			1.95354e+08	1.0527e+08	1.36394e+08	1.73359e+08	1.11989e+08	2.37956e+08	3.88258e+08	3.88796e+08	4.02826e+08	4.03024e+08	2.851	1.51	0.000385515
	C18 H34 N2 O5	358.247	16.749			8.38119e+07	4.80597e+07	5.6174e+07	2.17526e+07	5.41781e+06	1.29421e+08	1.69454e+08	9.45528e+07	2.09013e+08	1.36864e+08	2.848	1.51	0.0311398
	C10 H19 N3 O6	277.127	1.219			1.76202e+07	7.59438e+06	5.64414e+06	9.42024e+06	6.45269e+06	2.69647e+07	1.53023e+07	2.16122e+07	2.74693e+07	2.12145e+07	2.846	1.51	0.00561753
N-decanoyl histidine	C16 H27 N3 O3	309.205	7.653			2.83351e+07	2.59602e+07	5.32991e+07	2.32889e+07	1.71686e+07	7.38415e+07	9.76973e+07	4.8741e+07	1.48694e+08	7.1894e+07	2.844	1.51	0.00308345
	C18 H34 N2 O5 S	390.219	10.667			8.30933e+06	7.65913e+06	2.27938e+07	5.90101e+06	7.40713e+06	2.1759e+07	2.55473e+07	1.14165e+07	3.5256e+07	2.04244e+07	2.841	1.51	0.0224195
	C12 H33 N5 O2 P2 S	373.184	7.78			5.66144e+06	2.13168e+06	2.59645e+06	1.07905e+06	343557	5.5819e+06	6.05147e+06	3.48652e+06	9.78312e+06	6.27159e+06	2.839	1.51	0.0498022
	C14 H23 N4 O7 P	390.131	6.499			4.89739e+06	1.20633e+06	1.20454e+06	822851	552160	2.589e+06	3.41697e+06	2.92091e+06	3.60391e+06	8.2414e+06	2.837	1.5	0.0392042
(2S,4S)-Pinnatanine	C10 H16 N2 O5	244.106	1.591			2.60035e+07	1.40899e+07	1.26848e+07	1.30591e+07	5.27794e+06	2.85052e+07	4.59212e+07	2.17907e+07	4.49681e+07	3.70094e+07	2.834	1.5	0.0130457
N~2~-Tetradecanoyl-D-asparagine	C18 H34 N2 O4	342.252	19.462			4.69706e+07	2.21374e+07	3.03078e+07	1.23298e+07	5.75452e+06	6.25951e+07	7.75487e+07	4.11894e+07	9.47587e+07	5.26964e+07	2.828	1.5	0.0252058
Ethyl N-[(2-isopropyl-5-methylcyclohexyl)carbonyl]glycinate	C15 H27 N O3	269.199	15.295			1.19905e+07	8.35837e+06	9.68573e+06	3.36293e+06	747635	2.26851e+07	2.83678e+07	1.55919e+07	3.28852e+07	2.36312e+07	2.827	1.5	0.0321834
Laurolactam	C12 H23 N O	197.178	12.465	90.7		4.73967e+06	1.24504e+07	1.19333e+07	8.47209e+06	1.07546e+07	3.03626e+07	3.42544e+07	2.01571e+07	3.96148e+07	1.60963e+07	2.823	1.5	0.00242606
	C12 H24 N4 O S2	304.138	1.213			1.20334e+07	6.17394e+06	4.27454e+06	5.65242e+06	2.43901e+06	1.23524e+07	2.04843e+07	1.5887e+07	1.83234e+07	1.28859e+07	2.811	1.49	0.0111752
Linoleamide	C18 H33 N O	279.256	25.424			7.17086e+07	5.05517e+07	5.98387e+07	9.89573e+07	1.07415e+08	3.42676e+08	1.5224e+08	2.01415e+08	2.61796e+08	8.95488e+07	2.809	1.49	0.0117582
N~2~-[2-(1-Cyclohexen-1-yl)ethyl]-9-pentofuranosyl-9H-purine-2,6-diamine	C18 H26 N6 O4	390.2	4.903			3.44487e+07	1.26015e+07	1.14466e+07	1.23156e+07	5.24338e+06	2.3434e+07	4.23119e+07	3.26331e+07	3.45856e+07	4.73704e+07	2.808	1.49	0.0231718
Serpulanine A	C14 H18 N2 O4	278.126	4.148			1.50683e+08	6.89401e+07	8.35548e+07	7.60636e+07	1.60611e+07	2.22069e+08	2.13258e+08	1.11451e+08	2.37409e+08	1.81231e+08	2.804	1.49	0.0414197
		136.051	5.823			3.43911e+06	6.05973e+06	6.91326e+06	6.64908e+06	7.40953e+06	1.64297e+07	1.91316e+07	1.26596e+07	2.64583e+07	1.86432e+07	2.804	1.49	0.000298649
	C14 H34 N7 O3 P	379.247	7.525			1.10026e+06	1.05724e+06	2.69254e+06	1.02733e+06	670840	1.75748e+06	3.31847e+06	2.14749e+06	7.39374e+06	2.96368e+06	2.803	1.49	0.0204401
17-methyl-6Z-octadecenoic acid	C19 H36 O2	296.271	27.01			4.8938e+07	7.79565e+07	9.44698e+07	3.05874e+07	2.1332e+07	1.92534e+08	1.15653e+08	1.37089e+08	2.32917e+08	8.67534e+07	2.801	1.49	0.0124379
DL-β-Leucine	C6 H13 N O2	131.093	6.087	97.3		2.34374e+07	1.45346e+07	3.02416e+07	8.68236e+06	4.90551e+06	4.31211e+07	4.06824e+07	2.19852e+07	6.64645e+07	3.4021e+07	2.799	1.48	0.0295558
H-GLU-VAL-PHE-OH	C19 H27 N3 O6	393.19	6.002			2.90227e+06	2.0815e+06	2.13758e+06	992604	387692	5.82139e+06	7.98442e+06	4.7914e+06	7.12628e+06	5.6708e+06	2.797	1.48	0.0126722
Palmitoylcarnitine	C23 H45 N O4	399.335	21.518	99.6		2.48863e+07	1.31056e+07	3.53121e+07	1.93453e+07	2.44376e+07	7.17373e+07	3.01414e+07	6.8301e+07	1.12938e+08	3.75219e+07	2.795	1.48	0.013153
	C6 H17 N10 O3 P	308.122	1.126			2.56401e+06	6.47291e+06	4.38844e+06	1.58004e+07	1.18917e+07	1.20304e+07	1.95901e+07	1.54955e+07	1.80871e+07	2.56515e+07	2.794	1.48	0.0398612
	C13 H23 N7 O2 P2	371.14	21.54			5.65888e+06	2.68281e+06	5.60647e+06	913434	1.76339e+06	7.49018e+06	1.23533e+07	5.79798e+06	1.51628e+07	7.47795e+06	2.792	1.48	0.0210601
CAPROYL SARCOSINE	C13 H25 N O3	243.183	15.425			1.0595e+08	7.53406e+07	1.17147e+08	6.59998e+07	6.38441e+07	2.09941e+08	2.57668e+08	1.62113e+08	3.23697e+08	1.7138e+08	2.787	1.48	0.000661917
Lipoamide A	C15 H28 N2 O4	300.205	10.229			5.1179e+07	4.35213e+07	3.53056e+07	2.82445e+07	2.6306e+07	9.27221e+07	1.03848e+08	7.60153e+07	1.32512e+08	9.82919e+07	2.784	1.48	0.000267368
[5-(Methylsulfanyl)pentylidyne]azane oxide	C6 H11 N O S	145.056	5.267			6.76013e+06	5.44792e+06	1.05171e+07	3.27714e+06	1.36316e+06	1.44826e+07	1.55458e+07	9.05033e+06	2.34304e+07	1.5142e+07	2.779	1.47	0.0221653
	C16 H29 N7 O3	367.233	24.267			5.80699e+06	3.85742e+06	4.82613e+06	3.46215e+06	3.01999e+06	1.07186e+07	1.23213e+07	1.21765e+07	7.36531e+06	4.72514e+06	2.779	1.47	0.00942338
Leu-ala	C9 H18 N2 O3	202.132	4.754			8.33072e+06	3.60435e+06	4.31729e+06	2.42377e+06	1.3851e+06	8.20996e+06	1.32096e+07	8.59526e+06	2.5923e+07	9.99866e+06	2.774	1.47	0.0101566
	C10 H18 O8 S	298.072	6.045			1.00127e+07	3.89104e+06	2.56305e+06	3.20691e+06	1.39322e+06	9.09372e+06	7.63659e+06	6.95332e+06	1.10171e+07	8.88677e+06	2.771	1.47	0.0420249
	C21 H42 N5 O3 P	443.303	24.763			1.19171e+07	3.80822e+06	6.94221e+06	7.03792e+06	6.40464e+06	2.26282e+07	1.92192e+07	1.23922e+07	3.92059e+07	1.49554e+07	2.768	1.47	0.00385288
	C7 H19 N6 O3 P	266.127	4.549			1.96117e+07	7.49891e+06	5.51902e+06	5.68162e+06	4.90295e+06	1.76941e+07	1.54041e+07	1.5713e+07	2.16136e+07	1.15591e+07	2.766	1.47	0.0344581
12-(Azido)lauric acid	C12 H23 N3 O2	241.179	4.094			1.20972e+06	550038	622418	552333	1.22235e+06	1.65608e+06	3.21119e+06	1.26723e+06	3.50073e+06	1.72088e+06	2.765	1.47	0.00644671
FLK	C21 H34 N4 O4	406.258	5.379	60.8		7.71612e+06	3.27995e+06	3.02542e+06	2.57687e+06	806419	7.98053e+06	8.3372e+06	5.36773e+06	8.61292e+06	1.74351e+07	2.756	1.46	0.0288959
2R-aminohexadecanoic acid	C16 H33 N O2	271.251	23.284			1.0376e+08	1.77904e+08	2.21727e+08	1.66188e+08	1.72312e+08	5.38114e+08	4.74969e+08	2.92633e+08	6.00864e+08	2.39141e+08	2.756	1.46	0.00420791
Quinuclidinol	C7 H13 N O	127.1	1.724			4.49242e+07	3.26539e+07	7.6354e+07	3.24257e+07	1.18391e+07	7.63187e+07	1.04439e+08	5.92662e+07	1.54837e+08	8.99468e+07	2.755	1.46	0.0260549
Chetocochliodin F	C16 H19 N3 O5	333.132	5.642			2.60256e+07	1.52202e+07	1.34521e+07	1.44079e+07	1.29786e+07	3.96778e+07	4.63418e+07	2.51802e+07	5.33789e+07	2.89949e+07	2.754	1.46	0.00204312
	C16 H29 N3 O6	359.206	5.391			4.44705e+06	1.90402e+06	1.28631e+06	1.56839e+06	505766	4.29748e+06	5.59427e+06	3.70324e+06	5.99239e+06	3.89606e+06	2.74	1.45	0.0324716
Boc-Gln-Oh	C10 H18 N2 O5	246.121	4.694			3.61343e+07	2.81584e+07	5.52305e+07	2.6387e+07	1.721e+07	6.93016e+07	6.78881e+07	8.24384e+07	1.03133e+08	7.7139e+07	2.739	1.45	0.00502598
5-methyl-2-undecenoic acid	C12 H22 O2	198.162	12.451			2.26768e+07	4.23319e+07	3.86385e+07	3.04261e+07	3.17166e+07	8.67189e+07	9.51454e+07	6.02457e+07	1.07867e+08	5.31669e+07	2.734	1.45	0.00116167
Thiolactone B4	C7 H11 N O2 S	173.051	5.268			6.15321e+06	4.87971e+06	1.00112e+07	3.28091e+06	1.23591e+06	1.21905e+07	1.32926e+07	7.85111e+06	1.9686e+07	1.40844e+07	2.724	1.45	0.0286085
Anandamide (18:3, n-6)	C20 H35 N O2	321.267	23.525			4.65464e+07	1.0018e+08	9.44994e+07	7.31645e+07	1.0627e+08	3.20933e+08	2.32283e+08	2.56815e+08	5.03932e+08	1.32572e+08	2.718	1.44	0.00277764
NP-022469	C16 H24 O5	278.149	13.021	73.7		1.56923e+07	1.58722e+07	1.35399e+07	1.54108e+07	1.76882e+07	3.32572e+07	6.08684e+07	4.25348e+07	6.5284e+07	4.07456e+07	2.711	1.44	0.000487386
Soboliferamide	C9 H14 N2 O4	214.095	3.878			5.85489e+06	3.83989e+06	5.78869e+06	3.01874e+06	1.60716e+06	1.04078e+07	1.13986e+07	5.76887e+06	1.66338e+07	8.76411e+06	2.71	1.44	0.0103753
	C17 H31 N3 O6	373.221	5.997			5.71663e+06	2.42401e+06	2.13863e+06	1.88562e+06	650354	5.78771e+06	7.42375e+06	3.86975e+06	6.64487e+06	4.22635e+06	2.706	1.44	0.0461125
	C9 H20 N7 O5 P	337.127	5.159			3.71688e+06	1.73802e+06	2.26253e+06	1.24113e+06	554953	4.09228e+06	5.87734e+06	2.62533e+06	5.82733e+06	4.70395e+06	2.706	1.44	0.0280129
	C13 H34 N6 O6 P2	432.201	5.558			2.46041e+06	1.54567e+06	1.51275e+06	789671	251438	4.07701e+06	4.63195e+06	2.80232e+06	5.95962e+06	3.94608e+06	2.695	1.43	0.0212842
	C13 H30 N7 O4 P	379.211	6.03			8.26533e+06	2.55667e+06	3.15185e+06	2.40565e+06	763096	6.84799e+06	9.34956e+06	6.8888e+06	9.71304e+06	5.74759e+06	2.694	1.43	0.0470462
Indole	C8 H7 N	117.058	4.636		C00463	3.77104e+07	3.21651e+07	7.89202e+07	2.56262e+07	1.63394e+07	6.83966e+07	9.30855e+07	6.98871e+07	1.20248e+08	8.6588e+07	2.692	1.43	0.0176108
	C17 H27 N2 P S	322.164	4.188			2.259e+06	2.68443e+06	2.70803e+06	2.72005e+06	2.11168e+06	5.61874e+06	7.22405e+06	7.25173e+06	8.31822e+06	5.50327e+06	2.691	1.43	1.80923e-05
	C16 H30 N6 O2	338.243	16.207			2.74975e+07	2.17038e+07	4.86922e+07	2.06213e+07	1.31173e+07	4.54674e+07	4.58e+07	5.8258e+07	7.25208e+07	9.36369e+07	2.684	1.42	0.00851553
	C16 H32 N2 O3	300.241	8.122			1.01267e+08	7.56244e+07	1.0639e+08	8.00546e+07	7.68e+07	2.14754e+08	2.04497e+08	2.16494e+08	2.5679e+08	1.3925e+08	2.683	1.42	0.000220587
Pukeleimide G	C14 H16 N2 O5	292.106	4.079			2.18558e+07	9.73915e+06	7.38573e+06	7.07087e+06	2.48284e+06	1.963e+07	2.82704e+07	1.45574e+07	3.12345e+07	1.97832e+07	2.679	1.42	0.0375059
gamma-L-glutamyl-L-leucine	C11 H20 N2 O5	260.137	4.999			2.92916e+08	2.02625e+08	1.92784e+08	1.68267e+08	1.48181e+08	5.15839e+08	6.11143e+08	4.15174e+08	7.51891e+08	5.04463e+08	2.676	1.42	0.000154397
12-amino-octadecanoic acid	C18 H37 N O2	299.282	25.54			3.41945e+07	7.27524e+07	4.92814e+07	9.07142e+07	1.02486e+08	3.1394e+08	1.81206e+08	1.94497e+08	3.47184e+08	8.88916e+07	2.673	1.42	0.00723976
Sangivamycin	C12 H15 N5 O5	309.106	1.137			1.03759e+07	9.68983e+06	1.06105e+07	1.35405e+07	1.36769e+07	2.06608e+07	3.21859e+07	2.83449e+07	3.37689e+07	2.4942e+07	2.671	1.42	7.55022e-05
	C16 H38 N5 O2 P	363.277	23.882			1.01773e+07	7.66011e+06	1.18212e+07	3.93707e+06	1.50073e+06	2.74544e+07	2.03763e+07	1.35473e+07	7.59406e+07	1.26003e+07	2.66	1.41	0.0209327
lys-thr-glu	C15 H28 N4 O7	376.196	4.16			5.61286e+06	3.72868e+06	3.11321e+06	2.44555e+06	587261	4.88846e+06	8.27727e+06	8.33829e+06	5.92317e+06	1.21202e+07	2.659	1.41	0.0416395
1,2,3-Trimethoxy-5-(methoxymethyl)-4-[(methylsulfonyl)methyl]benzene	C13 H20 O6 S	304.098	5.866			9.08024e+06	6.27235e+06	3.91304e+06	5.4211e+06	5.30917e+06	1.45418e+07	1.22403e+07	1.60704e+07	1.35446e+07	1.43931e+07	2.655	1.41	0.00177371
4,7,10-hexadecatrienoic acid	C16 H26 O2	250.193	25.054			1.92225e+07	2.34268e+07	2.65146e+07	1.59117e+07	1.77643e+07	4.54369e+07	5.08492e+07	5.7459e+07	6.93033e+07	2.96566e+07	2.645	1.4	0.00135935
	C16 H24 N6 O	316.2	10.182			6.87351e+06	6.73601e+06	5.63871e+06	2.65225e+06	1.20445e+06	1.49132e+07	1.88891e+07	1.16512e+07	2.40916e+07	1.48993e+07	2.645	1.4	0.00981046
	C7 H17 N7 O3 P2	309.088	4.201			3.43985e+06	4.54558e+06	4.78687e+06	2.76764e+06	1.1136e+06	5.473e+06	1.27117e+07	9.09656e+06	1.49276e+07	9.03957e+06	2.644	1.4	0.00742159
octadec-9-ynoic acid	C18 H32 O2	262.23	25.422	96.2		1.61834e+07	1.23561e+07	1.35948e+07	2.32065e+07	2.22137e+07	7.28483e+07	3.11236e+07	4.27315e+07	5.22142e+07	1.97705e+07	2.64	1.4	0.0146
Cinnabaramide C	C19 H29 N O3	319.214	22.016			7.71252e+07	4.88856e+07	1.22135e+08	3.92139e+07	2.51881e+07	1.29035e+08	1.43381e+08	9.35042e+07	2.35619e+08	1.28097e+08	2.64	1.4	0.0215682
	C25 H34 N6 O2	450.273	17.394			1.07056e+07	1.46267e+07	9.27148e+06	4.42044e+06	941650	2.43963e+07	3.07738e+07	1.40338e+07	4.05263e+07	2.14398e+07	2.631	1.4	0.0376153
	C15 H29 N O4 S	319.181	10.386			1.01396e+07	7.33947e+06	9.59554e+06	4.36249e+06	3.04894e+06	1.92339e+07	2.07353e+07	1.08048e+07	3.05897e+07	1.75238e+07	2.621	1.39	0.0060496
	C17 H30 N4 O5	370.221	4.98			1.2336e+07	9.18872e+06	5.91713e+06	5.60076e+06	1.9807e+06	1.54889e+07	1.66295e+07	1.18712e+07	2.62973e+07	1.32473e+07	2.618	1.39	0.0294479
N-lauroyl lysine	C18 H36 N2 O3	328.272	9.499			4.93229e+07	4.10908e+07	1.04216e+08	4.088e+07	4.1102e+07	1.04476e+08	8.47179e+07	1.34434e+08	1.40976e+08	1.07165e+08	2.607	1.38	0.00842229
Bis(carbamoylamino)acetate	C4 H7 N4 O4	175.047	1.757			2.23143e+08	1.05222e+08	1.8089e+08	9.22865e+07	8.77698e+07	2.74157e+08	3.14297e+08	2.1913e+08	4.70716e+08	2.10262e+08	2.606	1.38	0.0111227
LLK	C18 H36 N4 O4	372.274	4.794	82.7		1.29633e+07	5.94257e+06	4.13004e+06	2.92441e+06	1.32554e+06	1.07382e+07	2.0416e+07	8.16454e+06	9.47754e+06	1.28687e+07	2.6	1.38	0.0493945
Lauroylsarcosine	C15 H29 N O3	271.215	19.742			3.86787e+07	2.82037e+07	5.89695e+07	2.45307e+07	1.62603e+07	7.157e+07	8.32446e+07	4.51901e+07	1.1422e+08	7.33212e+07	2.6	1.38	0.011204
3-amino-octanoic acid	C8 H17 N O2	159.126	1.221			1.8822e+08	1.79093e+08	1.96675e+08	3.37132e+08	4.07451e+08	5.44081e+08	5.11173e+08	4.30027e+08	5.65055e+08	2.63859e+08	2.599	1.38	0.0277657
3,12-dihydroxy palmitic acid	C16 H32 O4	288.23	15.23			1.14574e+07	9.75591e+06	8.76552e+06	6.78054e+06	7.86519e+06	2.2739e+07	2.24541e+07	2.31629e+07	2.13877e+07	2.65345e+07	2.594	1.38	0.000124204
alpha Aspartylphenylalanine	C13 H16 N2 O5	280.106	5.071	88.5		1.67666e+07	1.0896e+07	1.84428e+07	7.92532e+06	5.38382e+06	2.41331e+07	2.46112e+07	3.21788e+07	3.87003e+07	2.82584e+07	2.593	1.37	0.00934983
Serinolamides D	C23 H43 N O4	397.319	18.876			1.12236e+07	7.50936e+06	9.6811e+06	1.11249e+07	1.4318e+07	2.39306e+07	1.5596e+07	3.59984e+07	2.88108e+07	3.08789e+07	2.59	1.37	0.00125872
5-methyl-2E-tridecenoic acid	C14 H26 O2	226.193	18.49			4.2759e+07	8.35143e+07	8.71818e+07	7.13022e+07	7.452e+07	1.95899e+08	1.92906e+08	1.09977e+08	2.22212e+08	9.90713e+07	2.589	1.37	0.0056302
Xestoaminol B	C14 H27 N O	225.209	18.505			2.02408e+07	3.9257e+07	4.20047e+07	3.38841e+07	3.55442e+07	9.17031e+07	9.17203e+07	5.32425e+07	1.08061e+08	4.59633e+07	2.58	1.37	0.0061278
butalbital	C11 H16 N2 O3	224.116	5.407			4.3791e+06	2.74305e+06	2.87045e+06	2.24907e+06	1.31735e+06	5.59993e+06	6.83192e+06	7.06614e+06	1.12622e+07	1.11924e+07	2.576	1.37	0.00171609
	C24 H33 O3 P S	432.189	5.067			1.16973e+06	1.24095e+06	1.66437e+06	224102	170040	3.01307e+06	3.48984e+06	2.42259e+06	5.10337e+06	2.25714e+06	2.576	1.37	0.0251024
	C8 H25 N8 O6 P	360.164	4.083			1.1304e+07	6.42254e+06	4.98223e+06	3.51212e+06	1.74807e+06	1.41357e+07	1.49863e+07	1.21236e+07	1.25115e+07	1.2825e+07	2.574	1.36	0.0276638
	C20 H31 N3 O4	377.231	7.601			764838	1.38752e+06	3.03336e+06	1.57299e+06	2.12988e+06	2.12012e+06	4.0426e+06	4.95447e+06	4.63139e+06	3.07302e+06	2.57	1.36	0.0228328
Pinodiketopiperazine A	C15 H18 N2 O3	274.132	5.592			4.95442e+06	4.59004e+06	3.2787e+06	2.03921e+06	5.77607e+06	1.41719e+07	1.65184e+07	1.17902e+07	7.97845e+06	6.33797e+06	2.569	1.36	0.00432596
	C6 H2 Cl N9 O	251.007	1.102			1.30784e+07	9.38422e+06	6.77787e+06	2.38974e+07	7.94599e+06	2.40972e+07	3.006e+07	2.24122e+07	3.05394e+07	1.76588e+07	2.568	1.36	0.0188123
	C27 H30 N2 O3 S	462.196	4.396			1.21112e+07	4.5303e+06	2.81138e+06	5.28257e+06	3.20176e+06	1.16286e+07	1.16055e+07	7.0122e+06	1.51018e+07	7.66412e+06	2.562	1.36	0.0423256
γ-L-glutamyl-L-leucine	C11 H20 N2 O5	260.137	4.855			5.81598e+07	3.55111e+07	3.95427e+07	2.37578e+07	1.59358e+07	8.64126e+07	1.05439e+08	6.77484e+07	1.38602e+08	9.09e+07	2.56	1.36	0.00442007
	C15 H12 N4 O5	328.079	6.012			2.66357e+07	8.68785e+06	7.37744e+06	8.96245e+06	5.78232e+06	2.13835e+07	2.4152e+07	1.8312e+07	3.41753e+07	2.21889e+07	2.554	1.35	0.0250412
		189.063	2.434			2.4933e+08	1.57249e+08	1.99983e+08	1.01049e+08	7.08136e+07	4.08896e+08	4.01367e+08	2.90202e+08	5.07419e+08	3.25419e+08	2.552	1.35	0.00900298
Methyl N-acetylglycyl-L-lysinate	C11 H21 N3 O4	259.153	4.398			6.08784e+07	3.25741e+07	2.06615e+07	2.33656e+07	1.07853e+07	5.94444e+07	6.89965e+07	4.59263e+07	6.75255e+07	4.93144e+07	2.544	1.35	0.0419091
16-methyl-6Z,9Z,12Z-heptadecatrienoic acid	C18 H30 O2	278.224	26.291			5.04686e+07	1.78769e+08	1.1716e+08	1.18292e+08	1.27297e+08	2.8363e+08	3.00942e+08	3.71375e+08	3.4848e+08	1.35705e+08	2.544	1.35	0.011347
5-sec-Butyl-3-methoxy-2-methylpyrazine	C10 H16 N2 O	180.126	5.324			1.00319e+07	6.53787e+06	4.50737e+06	6.48578e+06	1.67842e+06	1.28549e+07	1.6486e+07	1.67617e+07	1.86767e+07	9.04812e+06	2.542	1.35	0.0219124
		159.088	5.167			3.37707e+07	2.62955e+07	4.81106e+07	1.89651e+07	1.37046e+07	7.22539e+07	6.68041e+07	4.65126e+07	1.15528e+08	6.31304e+07	2.541	1.35	0.00678791
	C24 H38 N6 O	426.309	15.871			5.5876e+06	3.22686e+06	2.2484e+06	2.82733e+06	2.29406e+06	6.96602e+06	6.14106e+06	7.18373e+06	1.39265e+07	8.92151e+06	2.541	1.35	0.002012
8-methoxy-13-hydroxy-9,11-octadecadienoic acid	C19 H34 O4	326.245	24.581			6.69383e+06	6.8651e+06	1.72348e+07	8.55406e+06	1.09819e+07	2.17109e+07	1.95021e+07	3.9889e+07	3.18311e+07	1.29478e+07	2.538	1.34	0.00883229
1,2-dihydroxyheptadec-16-yn-4-yl acetate	C19 H34 O4	348.227	24.582	98.5		6.69383e+06	6.8651e+06	1.72348e+07	8.55406e+06	1.09819e+07	2.17109e+07	1.95021e+07	3.9889e+07	3.18311e+07	1.29478e+07	2.538	1.34	0.00883229
	C10 H17 N O6 S	279.077	5.09			3.80095e+07	4.85201e+07	6.81878e+07	2.09695e+07	7.34771e+06	9.63002e+07	1.03435e+08	7.19539e+07	1.21793e+08	8.76179e+07	2.534	1.34	0.0359957
	C15 H35 N4 O6 P	398.228	5.083			3.97336e+06	3.49115e+06	3.81254e+06	2.43998e+06	840941	8.84026e+06	1.03669e+07	4.50035e+06	9.01182e+06	5.01344e+06	2.532	1.34	0.0203793
	C15 H19 N7 O4	361.148	4.074			6.85316e+06	2.94557e+06	2.32441e+06	2.64517e+06	1.0131e+06	6.69362e+06	7.80252e+06	5.51015e+06	9.95785e+06	5.93399e+06	2.531	1.34	0.0290011
Boc-Gln-Oh	C10 H18 N2 O5	246.121	1.267			6.2178e+07	5.70996e+07	4.49182e+07	2.23834e+07	8.19918e+06	1.13627e+08	1.13739e+08	4.96379e+07	1.36991e+08	1.00231e+08	2.53	1.34	0.0362246
	C13 H21 O9 P S	384.066	4.636			2.19746e+06	2.17742e+06	2.21174e+06	290952	97308.2	5.38906e+06	6.15907e+06	2.55108e+06	5.50669e+06	5.52253e+06	2.529	1.34	0.048169
2-amino-tetradecanoic acid	C14 H29 N O2	243.22	18.497			1.76567e+09	3.4692e+09	3.70506e+09	3.00385e+09	3.14947e+09	8.1579e+09	7.96324e+09	4.675e+09	9.41058e+09	4.2062e+09	2.528	1.34	0.00527123
tert-Butyl (2-(6-(6-methyl-1,2,4,5-tetrazin-3-yl)nicotinamido)ethyl)carbamate	C16 H21 N7 O3	359.169	5.233			8.09456e+06	5.26085e+06	3.53293e+06	3.63473e+06	3.04735e+06	9.1791e+06	9.41984e+06	6.79202e+06	1.23627e+07	8.41342e+06	2.525	1.34	0.0110194
	C20 H36 N2 O4	368.267	7.591			1.24595e+06	2.41684e+06	3.53083e+06	2.95528e+06	5.24377e+06	4.86477e+06	5.57107e+06	1.64659e+07	7.45992e+06	8.6308e+06	2.524	1.34	0.0121215
Parbendazole	C13 H17 N3 O2	247.132	4.794			3.09408e+06	2.15249e+06	2.00635e+06	2.13065e+06	3.10128e+06	6.06728e+06	7.2868e+06	4.3859e+06	5.42499e+06	4.40535e+06	2.52	1.33	0.000409821
L-Lysyl-3-(4H-imidazol-4-yl)-L-alanylglycinamide	C14 H25 N7 O3	339.202	21.53			2.63469e+07	1.61499e+07	3.05348e+07	1.31047e+07	1.11596e+07	4.05924e+07	4.9525e+07	3.69712e+07	6.08355e+07	3.93677e+07	2.513	1.33	0.00641968
4-methoxyacetanilide	C9 H11 N O2	165.079	24.263			9.203e+07	4.24658e+07	1.31243e+08	5.28161e+07	3.27523e+07	1.25793e+08	1.32637e+08	8.36742e+07	1.88586e+08	1.43965e+08	2.511	1.33	0.0394813
2-Amino-1-cyclohexyl-1,2,5-trideoxy-5-(4-morpholinyl)-L-arabinitol	C15 H30 N2 O3	286.226	7.593			1.62327e+07	1.26139e+07	3.3693e+07	1.35671e+07	1.3486e+07	3.40587e+07	3.36516e+07	2.44745e+07	7.72949e+07	3.67718e+07	2.51	1.33	0.0136529
	C12 H28 N9 O P S2	409.16	3.695			1.48568e+06	6.02329e+06	7.77749e+06	4.16429e+06	3.49863e+06	1.1109e+07	1.03889e+07	6.86606e+06	1.33048e+07	1.04505e+07	2.51	1.33	0.026253
Valinopine	C10 H17 N O6	247.105	5.015			3.30393e+07	5.07181e+07	6.11832e+07	2.1001e+07	1.01371e+07	8.26362e+07	8.44875e+07	5.93559e+07	9.45563e+07	6.32493e+07	2.501	1.32	0.0407483
5,7-dodecadien-1-ol	C12 H22 O	182.167	19.891			1.62505e+07	1.35554e+07	1.92212e+07	1.05504e+07	9.47856e+06	3.38923e+07	3.54686e+07	2.32517e+07	5.10786e+07	2.54116e+07	2.5	1.32	0.00164578
Cyclo-(L-Tyrosyl-cis-4-hydroxy-D-proline	C14 H16 N2 O4	276.111	5.264			5.86854e+06	4.44792e+06	4.63673e+06	3.6846e+06	3.42878e+06	1.10967e+07	1.28833e+07	9.76079e+06	1.48709e+07	9.7963e+06	2.495	1.32	5.66993e-05
	C18 H25 N7 O	355.211	6.935			1.25366e+07	1.4759e+07	1.90794e+07	1.03254e+07	2.27504e+06	2.17102e+07	3.08259e+07	3.47399e+07	3.12683e+07	3.39201e+07	2.494	1.32	0.0365918
	C13 H20 N3 P S	281.111	1.141			1.67423e+07	1.09346e+07	1.10413e+07	1.63829e+07	9.80472e+06	2.29486e+07	3.3079e+07	2.60437e+07	3.06906e+07	2.73942e+07	2.481	1.31	0.000703902
NP-016455	C11 H18 N2 O4	242.126	4.996	95.2		1.69204e+07	1.47035e+07	1.12981e+07	1.11599e+07	9.96983e+06	2.80031e+07	3.49362e+07	2.46214e+07	4.01548e+07	2.73768e+07	2.479	1.31	0.000158906
1-Butanol, 4-(butylnitrosamino)-	C8 H18 N2 O2	174.137	3.773			9.06796e+06	6.94336e+06	2.90013e+06	5.19337e+06	7.98558e+06	1.78495e+07	2.16452e+07	1.71953e+07	1.00131e+07	1.61414e+07	2.477	1.31	0.00475843
5-Aminovaleric acid	C5 H11 N O2	117.077	5.169	90.3		1.39315e+07	1.05259e+07	1.85517e+07	7.33112e+06	4.95248e+06	2.60148e+07	2.70023e+07	1.60041e+07	3.91452e+07	2.19282e+07	2.472	1.31	0.0132737
	C17 H32 N2 O5	344.231	15.251			9.50436e+07	6.96273e+07	6.99673e+07	2.84094e+07	1.03968e+07	1.64774e+08	2.02659e+08	1.15365e+08	2.36139e+08	1.72019e+08	2.471	1.3	0.0227786
	C28 H53 N10 O4 P3	686.349	6.847			2.08605e+06	1.30898e+06	441589	1.42032e+06	699251	4.11061e+06	5.13619e+06	2.73411e+06	3.23065e+06	1.99451e+06	2.468	1.3	0.01023
2-methyl-phenol	C7 H8 O	108.058	10.172			3.08081e+06	4.36979e+06	1.29605e+07	8.90616e+06	1.04974e+07	2.21866e+07	2.77508e+07	2.19464e+07	2.173e+07	1.88133e+07	2.464	1.3	0.0115921
	C10 H18 N9 O3 P	343.126	2.569			4.44172e+07	2.44749e+07	2.668e+07	5.39698e+07	3.7161e+07	6.92918e+07	9.15497e+07	5.90336e+07	9.5779e+07	9.47099e+07	2.464	1.3	0.00273748
1,2-dihydroxyheptadec-16-yn-4-yl acetate	C19 H34 O4	348.227	22.284	84.2		5.95491e+06	3.95848e+06	5.6988e+06	757696	1.29053e+06	9.29376e+06	9.74858e+06	9.89649e+06	1.9127e+07	7.96906e+06	2.463	1.3	0.0257828
	C7 H13 N O5 S	223.051	2.323			1.3555e+07	7.45862e+06	1.66628e+07	8.69969e+06	5.47371e+06	2.13605e+07	1.99545e+07	1.57169e+07	2.69016e+07	2.42303e+07	2.455	1.3	0.0126831
	C19 H34 N2 O4	354.252	7.524			1.04975e+06	1.598e+06	2.97561e+06	1.67256e+06	2.03658e+06	3.0929e+06	3.93378e+06	4.28732e+06	5.89555e+06	4.09571e+06	2.449	1.29	0.00391975
	C2 H6 N9 O P S	235.014	4.221			8.27437e+06	2.31658e+06	2.14706e+06	6.42508e+06	3.80319e+06	8.48194e+06	1.39653e+07	5.80548e+06	9.30797e+06	1.04054e+07	2.447	1.29	0.0323908
	C14 H30 N2 O	242.236	9.465			5.62355e+06	1.5712e+06	7.30937e+06	7.8124e+06	4.94778e+06	1.40632e+07	1.37444e+07	6.70279e+06	1.50971e+07	9.7402e+06	2.444	1.29	0.0380945
Tricholide B	C25 H43 N O4	421.319	18.181			5.69903e+06	5.33907e+06	6.80721e+06	8.34564e+06	1.13551e+07	1.45977e+07	1.20016e+07	3.87972e+07	1.65964e+07	2.28571e+07	2.438	1.29	0.00554929
	C10 H20 N7 O3 P	317.138	5.263			5.96017e+06	6.19023e+06	7.60869e+06	3.1158e+06	1.27722e+06	1.45065e+07	1.56488e+07	7.75028e+06	1.88444e+07	1.26876e+07	2.434	1.28	0.0179719
	C23 H34 N8 O2	454.279	7.293			5.9192e+06	3.83091e+06	3.40428e+06	3.2254e+06	1.32821e+06	8.28586e+06	1.18891e+07	7.18306e+06	8.2833e+06	8.77817e+06	2.434	1.28	0.0115348
9R-hydroxy-10E,12E-octadecadienoic acid, methyl ester	C19 H34 O3	310.251	26.289			1.0725e+08	3.82653e+08	2.48837e+08	2.56084e+08	2.62717e+08	6.06981e+08	6.23181e+08	7.81711e+08	7.27516e+08	2.84998e+08	2.433	1.28	0.0120364
Epi-Leucinopine	C11 H19 N O6	261.121	5.907			5.88496e+07	7.05772e+07	8.79718e+07	3.05489e+07	9.05366e+06	1.45693e+08	1.43027e+08	9.80727e+07	1.73294e+08	1.31808e+08	2.43	1.28	0.0386366
	C17 H30 N2 O4	326.22	15.203			1.08426e+07	7.07404e+06	6.70911e+06	3.27931e+06	1.54051e+06	1.62717e+07	2.01008e+07	1.14944e+07	2.31046e+07	1.60997e+07	2.425	1.28	0.0184426
O-hexanoyl-R-carnitine	C13 H25 N O4	259.178	11.545			1.24237e+07	1.12797e+07	1.09001e+07	5.28503e+06	2.90606e+06	2.40538e+07	2.78884e+07	1.42141e+07	3.57332e+07	2.64008e+07	2.422	1.28	0.00939889
		117.041	1.32			2.92423e+07	2.72434e+07	4.54694e+07	1.08602e+07	1.48851e+07	6.5865e+07	6.94607e+07	3.20367e+07	9.15782e+07	6.02871e+07	2.418	1.27	0.01503
Streptcytosine G	C15 H21 N3 O5	323.148	5.11			5.84798e+06	3.44105e+06	2.66123e+06	1.66553e+06	670883	7.82462e+06	6.42543e+06	4.05469e+06	1.15285e+07	4.6657e+06	2.414	1.27	0.0445056
	C16 H32 N2 O3	300.241	7.692			1.10035e+07	1.16529e+07	2.5015e+07	1.21761e+07	1.27862e+07	2.93871e+07	2.53348e+07	3.37601e+07	3.53966e+07	2.71541e+07	2.414	1.27	0.00427604
1-acetyl-2-isobutyrylpyrazolidine-4-carboxylic acid	C10 H16 N2 O4	228.111	4.694			1.61999e+07	1.29797e+07	2.35191e+07	1.11371e+07	6.80164e+06	2.88364e+07	2.75392e+07	3.36066e+07	3.38148e+07	3.12858e+07	2.41	1.27	0.0123966
	C11 H31 N5 O3 P2 S	375.164	4.236			2.47942e+07	1.21025e+07	9.94639e+06	1.01317e+07	3.46357e+06	1.87761e+07	2.69697e+07	1.69881e+07	3.71905e+07	2.44078e+07	2.409	1.27	0.0498323
	C15 H19 N O7	325.116	2.583			3.25863e+07	2.30879e+07	2.31569e+07	4.28073e+07	2.91921e+07	5.0998e+07	7.03229e+07	4.44307e+07	7.65002e+07	7.4917e+07	2.409	1.27	0.0016115
	C22 H33 N8 O7 P	552.222	6.225			3.05498e+06	1.80618e+06	2.02638e+06	641913	194271	4.25147e+06	7.34484e+06	4.21754e+06	7.77034e+06	4.34815e+06	2.407	1.27	0.0291055
	C18 H12 N10 O5	448.1	5.791			3.68449e+06	2.0881e+06	548728	1.72506e+06	1.60321e+06	4.99529e+06	4.68741e+06	4.15286e+06	3.48247e+06	3.71313e+06	2.407	1.27	0.0373072
Chrysogedone A	C10 H15 N O2	181.11	7.498			7.31486e+06	3.97112e+06	2.60649e+06	8.06872e+06	2.98626e+06	8.11273e+06	1.17446e+07	9.55305e+06	1.00802e+07	6.95205e+06	2.406	1.27	0.0331852
Acetyl-L-methionine	C7 H13 N O3 S	191.062	5.268			1.80855e+07	1.63541e+07	2.89046e+07	8.89892e+06	3.81793e+06	3.8712e+07	4.15228e+07	2.34489e+07	6.31545e+07	3.9234e+07	2.399	1.26	0.0257833
Ceriporic acid B	C21 H38 O4	354.277	21.394			5.01276e+06	5.03615e+06	4.76092e+06	4.31614e+06	3.46917e+06	1.14165e+07	1.13709e+07	1.64748e+07	1.05481e+07	1.62683e+07	2.398	1.26	3.43063e-05
	C8 H19 N6 O5 P	310.116	4.079			2.25173e+07	1.00025e+07	8.69576e+06	7.89548e+06	2.83378e+06	2.08331e+07	2.7767e+07	1.59677e+07	2.76911e+07	1.99944e+07	2.396	1.26	0.0424642
Prenyl-L-cysteine	C8 H15 N O2 S	189.082	5.556			8.8528e+06	2.93666e+06	2.49937e+06	5.14878e+06	2.79037e+06	6.75355e+06	9.89023e+06	5.5239e+06	1.0277e+07	7.03261e+06	2.395	1.26	0.046496
	C7 H8 N10 O2 S	296.056	5.797			9.05713e+06	4.02711e+06	2.64484e+06	3.33618e+06	1.48127e+06	7.97453e+06	6.6619e+06	6.05311e+06	1.25082e+07	8.97775e+06	2.39	1.26	0.0396106
2-{6-Oxo-6-[4-(L-phenylalanyl)-1-piperazinyl]hexyl}guanidine	C20 H32 N6 O2	388.257	15.025			2.61409e+07	1.51141e+07	1.64325e+07	7.28036e+06	1.83987e+06	3.4216e+07	4.09112e+07	2.52279e+07	5.16797e+07	3.61148e+07	2.389	1.26	0.0439907
Fungerin	C13 H18 N2 O2	234.137	4.682			1.28867e+07	6.97341e+06	8.8355e+06	4.58832e+06	2.47714e+06	1.66263e+07	2.48245e+07	1.14557e+07	2.93246e+07	1.18502e+07	2.384	1.25	0.0186133
octadec-9-ynoic acid	C18 H32 O2	262.229	16.203	96.5		2.12721e+07	1.67349e+07	3.84713e+07	1.6908e+07	1.17542e+07	3.11789e+07	3.06796e+07	4.02609e+07	5.71974e+07	6.8855e+07	2.381	1.25	0.0139751
		94.0536	7.912			4.50367e+06	1.35393e+06	3.58646e+06	2.42658e+06	5.10998e+06	1.81724e+07	8.53173e+06	7.99565e+06	9.76229e+06	2.87813e+06	2.379	1.25	0.0357481
2-(2-benzimidazolylazo)-4-acetamidophenol	C15 H13 N5 O2	295.106	6.16			1.97271e+07	1.96838e+07	2.44486e+07	8.24756e+06	2.5484e+06	4.67241e+07	4.98757e+07	3.07048e+07	6.01632e+07	3.77309e+07	2.374	1.25	0.0307571
	C10 H12 P2	194.042	1.142			6.81048e+06	1.24062e+07	8.70851e+06	1.61599e+07	1.16032e+07	1.93923e+07	3.01454e+07	3.33157e+07	2.62793e+07	2.75477e+07	2.374	1.25	0.00134837
Malassezialactic acid	C20 H18 N2 O3	334.132	6.58			5.02682e+06	2.24596e+06	2.23963e+06	1.50083e+06	555140	5.30357e+06	7.15713e+06	4.73496e+06	7.80765e+06	4.65253e+06	2.368	1.24	0.0300881
N-tetradecanoyl-homoserine lactone	C18 H33 N O3	311.246	15.361			7.6112e+06	1.4024e+07	1.52761e+07	1.3434e+07	2.52566e+07	2.93686e+07	3.31938e+07	3.38371e+07	4.06626e+07	1.58349e+07	2.367	1.24	0.0199485
Elaidic carnitine	C25 H47 N O4	425.35	22.025			2.99804e+07	1.244e+07	3.43408e+07	2.06118e+07	2.49833e+07	5.89952e+07	2.56648e+07	7.99434e+07	9.0261e+07	4.21598e+07	2.361	1.24	0.0199495
Cyclo(S-Phe-S-Gln)	C14 H17 N3 O3	275.127	4.798			7.33227e+06	4.04677e+06	2.95302e+06	2.78094e+06	1.71392e+06	6.97079e+06	9.57851e+06	6.78891e+06	8.76595e+06	6.32937e+06	2.361	1.24	0.0236775
N,N-diethyl-3-hydroxybut-2-enamide	C8 H15 N O2	157.11	1.236			1.0866e+09	6.9426e+08	5.4607e+08	3.59865e+08	2.72485e+08	1.58378e+09	1.41239e+09	1.28737e+09	1.2319e+09	1.11317e+09	2.358	1.24	0.0176459
	C16 H16 N8 O	336.143	4.896			1.65945e+07	9.21104e+06	1.08024e+07	7.32104e+06	2.80335e+06	2.85412e+07	2.11266e+07	1.43345e+07	2.20502e+07	2.17143e+07	2.357	1.24	0.0279491
		102.047	4.634			7.92694e+07	6.50429e+07	1.45923e+08	4.14598e+07	2.24109e+07	1.31471e+08	1.8052e+08	1.2185e+08	2.23683e+08	1.52965e+08	2.352	1.23	0.031333
Succinic anhydride	C4 H4 O3	100.017	2.824			9.5821e+07	8.56932e+07	1.38757e+08	6.53144e+07	5.24139e+07	2.36607e+08	2.01436e+08	8.99588e+07	2.87755e+08	1.59596e+08	2.351	1.23	0.017444
		85.0898	6.094			4.56417e+07	2.8589e+07	5.08933e+07	1.99808e+07	1.39695e+07	6.72374e+07	6.69385e+07	3.56239e+07	1.61315e+08	6.67901e+07	2.341	1.23	0.0294874
2,4-dihydroxyheptadec-16-en-1-yl acetate	C19 H36 O4	310.251	23.493	81.4		5.0484e+06	3.08808e+06	3.79418e+06	1.98899e+06	952785	6.893e+06	7.21989e+06	6.49995e+06	1.39765e+07	7.51688e+06	2.338	1.23	0.0130711
		131.057	1.756			2.12496e+07	6.96451e+06	2.04651e+07	1.1869e+07	1.25347e+07	2.93041e+07	3.50155e+07	2.3182e+07	4.95491e+07	2.34327e+07	2.338	1.23	0.012716
10(R)-hydroxy-8Z-octadeceneic acid	C18 H34 O3	298.251	16.207			2.82989e+07	2.29317e+07	5.25847e+07	2.18527e+07	1.58289e+07	4.28459e+07	4.21556e+07	5.35876e+07	7.78461e+07	8.94307e+07	2.337	1.22	0.0134768
	C18 H24 N P S	317.137	6.663			2.38935e+06	2.9649e+06	3.97654e+06	1.75358e+06	789671	5.37853e+06	6.56014e+06	2.92891e+06	7.91711e+06	5.58119e+06	2.336	1.22	0.0231379
Thiomorpholine	C4 H9 N S	103.046	5.27			1.05107e+07	7.90501e+06	1.36675e+07	4.74299e+06	2.29384e+06	1.84437e+07	1.89628e+07	1.19658e+07	2.80759e+07	1.81672e+07	2.333	1.22	0.0275033
	C17 H34 N2 O3	314.257	10.318			2.59441e+08	2.50469e+08	3.94002e+08	1.90313e+08	1.08621e+08	7.30799e+08	5.41915e+08	4.58792e+08	1.37115e+09	5.84214e+08	2.332	1.22	0.00441972
16-methyl-6Z,9Z-heptadecadienoic acid	C18 H32 O2	280.24	16.205			9.31088e+06	7.26195e+06	1.65268e+07	7.23518e+06	5.18044e+06	1.36738e+07	1.37382e+07	1.69264e+07	2.45785e+07	2.94406e+07	2.331	1.22	0.0127677
L-Methionine	C5 H11 N O2 S	149.051	5.268	97.7	C00073	1.40483e+07	1.10668e+07	1.88007e+07	7.21007e+06	3.3298e+06	2.52209e+07	2.69267e+07	1.59561e+07	3.97821e+07	2.57432e+07	2.326	1.22	0.024356
L-Tyrosine	C9 H11 N O3	181.074	21.405	93	C00082	6.81653e+06	5.17813e+06	9.45876e+06	4.43089e+06	3.20903e+06	1.20018e+07	1.2548e+07	5.58496e+06	1.84589e+07	1.07217e+07	2.318	1.21	0.0289564
	C20 H36 N4 O4	396.273	7.735			3.31158e+06	3.68733e+06	2.86356e+06	2.85526e+06	3.8494e+06	5.56196e+06	6.83794e+06	1.09595e+07	7.6772e+06	1.19443e+07	2.318	1.21	0.00151966
meribendan	C15 H14 N6 O	294.122	4.941			9.6457e+07	5.45695e+07	4.63906e+07	4.05767e+07	1.74999e+07	1.07215e+08	1.33541e+08	8.01629e+07	1.15509e+08	7.95507e+07	2.311	1.21	0.0376435
Ceriporic acid C	C21 H36 O4	352.261	22.454			4.4249e+07	6.45198e+07	5.16129e+07	6.78975e+07	7.41928e+07	1.49131e+08	1.6749e+08	1.50259e+08	5.01725e+07	1.04896e+08	2.311	1.21	0.0379631
6E-Octene-2,4-diynoic acid	C8 H6 O2	134.037	7.098			7.18709e+06	1.01604e+07	7.7293e+06	3.47803e+06	2.76585e+06	8.03214e+06	1.6971e+07	1.66121e+07	1.49235e+07	1.91825e+07	2.311	1.21	0.0148144
N~2~,N~6~-Bis(6-hydroxyhexanoyl)lysine	C18 H34 N2 O6	374.241	14.108			3.30975e+07	1.95759e+07	1.90135e+07	8.4006e+06	2.25031e+06	4.30784e+07	5.11001e+07	3.18808e+07	6.59597e+07	4.39218e+07	2.31	1.21	0.0427824
	C10 H15 N O5 S	261.067	5.09			2.10796e+06	2.34272e+06	3.49962e+06	1.0819e+06	327162	4.8509e+06	5.09634e+06	3.45468e+06	6.23025e+06	4.76658e+06	2.301	1.2	0.0422316
Glycyl-L-tyrosyl-L-alanine	C14 H19 N3 O5	309.132	4.913			1.30903e+07	9.25708e+06	7.17681e+06	6.75377e+06	2.94427e+06	2.15171e+07	1.73591e+07	1.04133e+07	1.64957e+07	1.27292e+07	2.298	1.2	0.0323456
		149.05	1.784			9.05031e+07	7.23791e+07	5.07214e+07	2.72664e+07	2.21988e+07	1.16437e+08	1.31688e+08	9.93703e+07	1.60833e+08	1.09101e+08	2.296	1.2	0.0200263
2,4-dihydroxyheptadec-16-en-1-yl acetate	C19 H36 O4	350.243	23.488	83.3		1.59346e+07	9.18968e+06	1.02411e+07	4.35487e+06	2.33377e+06	2.11889e+07	2.01022e+07	2.09712e+07	3.62502e+07	2.1067e+07	2.292	1.2	0.0201657
Toyocamycin	C12 H13 N5 O4	291.095	1.367			3.31436e+07	2.44783e+07	2.33446e+07	2.69392e+07	1.65138e+07	4.52301e+07	5.58284e+07	3.13978e+07	6.01973e+07	6.61839e+07	2.281	1.19	0.00336981
	C11 H32 N9 O5 P	401.227	5.372			5.18068e+06	2.7201e+06	2.08868e+06	2.46477e+06	1.31013e+06	8.81499e+06	7.24896e+06	5.36045e+06	5.62206e+06	4.07359e+06	2.281	1.19	0.012555
Ent-cycloechinulin	C20 H21 N3 O3	351.158	6.578			3.47704e+07	1.54924e+07	1.59688e+07	1.09454e+07	3.92903e+06	3.51811e+07	4.94848e+07	3.34864e+07	5.15462e+07	3.17441e+07	2.271	1.18	0.0322796
NP-016455	C11 H18 N2 O4	484.253	5.891	98.1		1.48452e+07	9.90682e+06	9.36641e+06	4.53478e+06	1.83358e+06	2.1236e+07	2.4276e+07	1.47156e+07	2.42007e+07	1.63887e+07	2.267	1.18	0.0368126
	C10 H25 N5 O4 P2 S	373.112	2.404			6.11165e+07	3.23527e+07	2.41557e+07	1.81129e+07	1.10411e+07	5.36522e+07	5.47214e+07	4.3584e+07	6.8774e+07	5.81151e+07	2.265	1.18	0.0477894
	C22 H41 N O5	399.298	22.626			4.85607e+06	2.31584e+06	3.62758e+06	2.46209e+06	1.86677e+06	4.74851e+06	5.71867e+06	5.57645e+06	9.4411e+06	4.11465e+06	2.265	1.18	0.0150628
	C19 H34 N5 O4 P3	489.185	4.228			9.93294e+06	6.47653e+06	6.62883e+06	5.51081e+06	4.07122e+06	8.534e+06	1.4557e+07	2.073e+07	1.68163e+07	1.45997e+07	2.254	1.17	0.00360181
	C24 H35 N O6 S	465.218	24.889			1.78007e+06	1.37508e+06	1.23798e+06	717771	233839	5.17459e+06	2.78622e+06	1.97932e+06	1.07945e+07	1.20609e+06	2.251	1.17	0.0364304
	C12 H31 N5 O2 P2 S	371.169	5.786			6.23562e+06	5.39485e+06	3.23811e+06	3.56971e+06	1.16164e+06	8.03119e+06	1.06216e+07	6.7591e+06	9.30363e+06	6.79054e+06	2.25	1.17	0.0382472
	C13 H24 N2 O4 S	304.146	6.945			6.97687e+06	4.25475e+06	6.1791e+06	2.97176e+06	1.02133e+06	9.27825e+06	1.1019e+07	6.7464e+06	1.50109e+07	9.55316e+06	2.245	1.17	0.0366193
8(S)-amino-2(R)-methyl-7-oxononanoic acid	C10 H19 N O3	201.136	8.869			4.32977e+06	4.07519e+06	5.48556e+06	3.03626e+06	2.48796e+06	9.14382e+06	9.82222e+06	6.91446e+06	1.22847e+07	6.28903e+06	2.244	1.17	0.00198543
Microcystin		171.052	2.432			2.39546e+07	1.37089e+07	1.76959e+07	1.51696e+07	1.29954e+07	3.40326e+07	3.56163e+07	3.11372e+07	4.87509e+07	3.13199e+07	2.243	1.17	0.000593111
	C15 H33 N6 O8 P3	518.157	4.232			2.18647e+06	1.08919e+06	1.5945e+06	3.12186e+06	1.97234e+06	3.07872e+06	5.00174e+06	6.25316e+06	3.83431e+06	4.42126e+06	2.242	1.16	0.00495268
	C9 H27 N8 O5 P	358.185	5.033			6.56593e+06	4.14735e+06	2.70747e+06	2.41587e+06	1.14535e+06	6.06374e+06	7.7738e+06	4.94016e+06	8.08186e+06	5.91554e+06	2.24	1.16	0.0491986
16-methyl-6Z,9Z,12Z-heptadecatrienoic acid	C18 H30 O2	278.224	18.736			3.03503e+07	2.89856e+07	5.89231e+07	3.20362e+07	3.14681e+07	6.11368e+07	6.63058e+07	9.47606e+07	7.04443e+07	7.41462e+07	2.239	1.16	0.00253565
		191.061	5.269			2.43672e+08	2.13104e+08	3.61544e+08	1.28407e+08	5.06565e+07	4.7706e+08	4.84141e+08	3.16489e+08	6.89932e+08	4.74469e+08	2.239	1.16	0.0322573
	C10 H16 N5 O5 P	317.087	1.305			1.41126e+07	9.3875e+06	1.26817e+07	6.66622e+06	4.15521e+06	7.91957e+06	2.48948e+07	2.09761e+07	2.62714e+07	1.78087e+07	2.234	1.16	0.043772
L-Tyrosine	C9 H11 N O3	181.074	4.373	95	C00082	1.13931e+07	1.11881e+07	6.40224e+06	7.00409e+06	5.53693e+06	1.56034e+07	1.21216e+07	9.82976e+06	1.58025e+07	2.69371e+07	2.228	1.16	0.0213869
14-hydroxy-12-tetradecenoic acid	C14 H26 O3	242.188	16.107			1.79056e+08	2.56365e+08	3.94571e+08	1.8711e+08	1.82901e+08	2.78162e+08	3.84254e+08	4.14792e+08	5.41154e+08	5.81072e+08	2.217	1.15	0.0150444
12-hydroxy-10-dodecenoic acid	C12 H22 O3	214.157	20.034			1.54306e+07	1.67804e+07	2.24173e+07	1.2884e+07	1.31468e+07	2.74413e+07	3.51598e+07	3.41232e+07	4.89273e+07	2.3692e+07	2.211	1.14	0.00194514
	C29 H47 N4 O10 P S	674.276	5.1			4.81413e+06	2.87419e+06	1.5413e+06	2.01756e+06	1.00661e+06	4.45971e+06	5.33106e+06	3.62593e+06	6.64981e+06	4.43022e+06	2.21	1.14	0.0346646
	C14 H30 N7 O4 P	391.211	5.601			7.78241e+06	5.61468e+06	4.19901e+06	2.5008e+06	789934	9.12342e+06	1.17052e+07	1.22754e+07	7.92561e+06	9.28034e+06	2.21	1.14	0.0477221
NP-008993	C18 H34 O4	314.246	18.734	98.7		8.71697e+07	9.00144e+07	1.78492e+08	9.69394e+07	9.41111e+07	1.86671e+08	1.99626e+08	2.80032e+08	2.07891e+08	2.13208e+08	2.209	1.14	0.00311227
2R-amino-4S-hydroxy-5-hexynoic acid	C6 H9 N O3	143.058	5.267			3.97118e+07	3.46568e+07	5.68214e+07	2.12969e+07	1.12426e+07	7.59503e+07	8.25895e+07	5.02452e+07	1.18839e+08	7.65669e+07	2.209	1.14	0.0189339
Indoline	C8 H9 N	119.074	6.206			1.13201e+08	6.59513e+07	7.24729e+07	4.38901e+07	2.39871e+07	1.30125e+08	1.63984e+08	8.45183e+07	1.89474e+08	1.45302e+08	2.203	1.14	0.0229631
	C15 H12 N4 O5	328.079	5.803			5.10258e+07	2.26778e+07	1.65117e+07	1.86295e+07	1.26974e+07	4.02295e+07	4.34588e+07	3.12745e+07	5.92686e+07	4.10106e+07	2.201	1.14	0.0430487
	C7 H15 N6 O P	230.106	6.226			6.29567e+06	3.8147e+06	4.35651e+06	2.13439e+06	1.25109e+06	8.38912e+06	9.21168e+06	6.48084e+06	8.80852e+06	5.14167e+06	2.199	1.14	0.0333085
	C15 H34 N5 O3 P	363.241	21.409			1.3922e+08	9.48154e+07	1.94717e+08	8.45603e+07	5.94649e+07	1.92246e+08	2.30231e+08	1.07356e+08	3.31967e+08	2.08067e+08	2.194	1.13	0.0466744
Linoleoyl ethanolamide	C20 H37 N O2	323.282	24.744	99		2.33033e+08	4.12264e+08	3.10017e+08	2.50039e+08	3.49992e+08	1.02788e+09	6.2948e+08	6.798e+08	1.52186e+09	3.45624e+08	2.193	1.13	0.0188339
L-Phenylalanine	C9 H11 N O2	165.078	6.668	98.5		3.50582e+07	2.41188e+07	4.15742e+07	1.81584e+07	1.13614e+07	5.28815e+07	5.35921e+07	3.87394e+07	8.98418e+07	4.55971e+07	2.193	1.13	0.0203995
11-Hydroxy-9-tridecenoic acid	C13 H24 O3	228.172	20.024			1.0238e+07	1.1826e+07	1.5692e+07	8.90892e+06	8.17762e+06	1.8374e+07	2.38046e+07	2.24439e+07	3.23877e+07	1.59367e+07	2.192	1.13	0.00257823
	C14 H21 N S2	267.11	4.206			3.61592e+06	2.23943e+06	3.42937e+06	3.27311e+06	2.07298e+06	4.5041e+06	7.17297e+06	6.95245e+06	8.39279e+06	7.60453e+06	2.191	1.13	0.000598131
Penidilamine	C10 H11 N O4	209.069	1.716			1.61078e+07	3.62315e+07	1.71629e+07	1.65617e+07	2.71524e+07	3.72454e+07	3.75212e+07	5.46469e+07	4.31529e+07	2.14482e+07	2.186	1.13	0.0394216
1-Boc-3-(Amino)azetidine	C8 H16 N2 O2	172.121	4.111			3.00731e+07	1.69629e+07	1.43506e+07	1.4519e+07	7.10064e+06	3.29391e+07	3.17362e+07	2.37547e+07	3.44019e+07	2.39679e+07	2.186	1.13	0.0428477
	C7 H22 N7 O4 P	299.148	4.956			1.40475e+07	9.30527e+06	7.49655e+06	6.947e+06	3.23432e+06	1.63861e+07	1.99859e+07	1.27675e+07	1.66909e+07	1.43173e+07	2.186	1.13	0.0306945
threo-9,10-Dihydroxystearic acid	C18 H36 O4	316.261	16.208			1.55152e+08	1.23218e+08	2.75597e+08	1.24369e+08	8.51397e+07	2.23509e+08	2.11605e+08	2.71645e+08	3.90006e+08	4.47517e+08	2.184	1.13	0.0176598
Psychrophilin C	C21 H18 N4 O5	406.126	6.505			739389	1.89557e+06	1.86391e+06	2.10777e+06	2.28257e+06	4.88522e+06	4.13805e+06	3.66046e+06	4.54641e+06	3.12841e+06	2.183	1.13	0.00944317
	C15 H19 N7 O	313.164	5.741			2.98538e+06	2.09208e+06	1.66742e+06	1.45567e+06	529163	3.63711e+06	4.88991e+06	2.91654e+06	4.19715e+06	3.06993e+06	2.181	1.13	0.0350441
	C14 H35 N6 O4 P	382.244	10.322			4.13329e+06	4.20114e+06	6.44658e+06	3.2833e+06	1.75181e+06	1.09516e+07	8.09544e+06	7.03483e+06	1.77222e+07	8.98871e+06	2.175	1.12	0.00619797
	C15 H27 N8 O2 P	382.199	5.979			2.20851e+06	1.79962e+06	1.52077e+06	1.90676e+06	1.39954e+06	4.07502e+06	3.308e+06	3.23976e+06	4.19674e+06	3.91485e+06	2.175	1.12	0.000111924
Farinomalein	C10 H13 N O4	211.085	4.377			1.75389e+07	9.15257e+06	7.77759e+06	9.26333e+06	3.80785e+06	1.98484e+07	2.23341e+07	1.2028e+07	2.1067e+07	1.47619e+07	2.169	1.12	0.0380452
N-stearoyl glycine	C20 H39 N O3	341.293	25.608			3.56789e+06	3.82427e+06	3.10313e+06	3.82354e+06	1.48149e+06	1.52689e+07	7.66853e+06	7.73225e+06	1.69559e+07	3.54008e+06	2.167	1.12	0.0149524
		158.057	5.113			8.96869e+06	2.91971e+07	2.51049e+07	2.40834e+07	2.36771e+07	6.86563e+07	6.5072e+07	4.99197e+07	5.21245e+07	4.29606e+07	2.164	1.11	0.00689467
	C12 H19 N2 O4 P	286.11	1.208			6.02029e+06	4.20447e+06	2.60024e+06	3.12835e+06	1.75766e+06	5.98615e+06	8.66799e+06	6.76995e+06	1.17216e+07	6.4358e+06	2.164	1.11	0.0108054
	C13 H32 N4 O3 S2	356.192	21.531			1.78281e+07	8.56661e+06	1.77785e+07	8.29536e+06	7.23116e+06	1.85195e+07	2.33897e+07	1.56149e+07	2.51285e+07	1.84313e+07	2.162	1.11	0.037057
NP-021698	C11 H13 N O4	223.084	5.149	99.2		2.14157e+07	1.60826e+07	2.87441e+07	1.31091e+07	9.48071e+06	3.67788e+07	3.46839e+07	2.07402e+07	4.69001e+07	2.96441e+07	2.157	1.11	0.0224778
	C11 H19 N O6 S	293.093	1.957			3.51001e+07	2.94167e+07	2.51069e+07	4.90367e+07	4.32447e+07	4.90124e+07	8.24131e+07	7.59306e+07	7.03863e+07	7.55722e+07	2.153	1.11	0.00259854
	C12 H29 N4 P	260.214	26.291			2.5268e+06	1.58654e+07	1.05845e+07	1.1151e+07	1.22912e+07	2.174e+07	2.40116e+07	3.11255e+07	2.99693e+07	1.18619e+07	2.153	1.11	0.0457885
	C16 H21 N7 O4	375.164	5.122			2.72269e+07	1.64422e+07	2.00304e+07	1.53706e+07	7.31961e+06	3.53746e+07	3.96899e+07	2.44215e+07	4.67506e+07	3.32099e+07	2.151	1.11	0.0177304
D-(+)-Pyroglutamic Acid	C5 H7 N O3	129.043	15.303	96.8	C02237	5.681e+07	2.48827e+07	4.75632e+07	3.14341e+07	2.71113e+07	6.25669e+07	6.75521e+07	6.65155e+07	9.24712e+07	7.20713e+07	2.149	1.1	0.00904818
4-({3-[(1-Methyl-1H-benzimidazol-2-yl)methoxy]phenyl}amino)-4-oxobutanoic acid	C19 H19 N3 O4	353.138	5.824			3.40069e+06	4.60735e+06	6.9898e+06	3.61801e+06	3.09001e+06	1.00983e+07	7.77655e+06	5.59937e+06	8.41295e+06	6.10965e+06	2.149	1.1	0.0138601
6-[1]-ladderane hexanol	C18 H28 O	260.214	23.783			5.2973e+06	3.8176e+06	5.61702e+06	4.31397e+06	3.72434e+06	8.94522e+06	9.25705e+06	1.06105e+07	2.01786e+07	7.98552e+06	2.146	1.1	0.00335955
	C15 H33 N7 O5 S2	455.2	3.673			2.27107e+07	1.52048e+07	1.55813e+07	1.39673e+07	1.33319e+07	2.24222e+07	3.25476e+07	3.90236e+07	3.26049e+07	2.64955e+07	2.141	1.1	0.00140882
Methyl 7-oxo-11E-tetradecenoate	C15 H26 O3	254.188	23.521			4.63134e+06	7.2558e+06	1.09486e+07	7.86734e+06	9.32439e+06	1.19153e+07	1.67904e+07	1.97654e+07	2.53485e+07	1.3238e+07	2.134	1.09	0.00451093
4-Acetamido-N-[2-(diethylamino)ethyl]-3-hydroxybenzamide	C15 H23 N3 O3	293.174	3.794			1.40264e+08	9.04991e+07	7.62205e+07	6.61565e+07	2.67347e+07	1.53932e+08	2.14245e+08	1.62479e+08	1.96282e+08	1.23891e+08	2.132	1.09	0.0303181
	C14 H36 N10 O2 S	408.274	9.952			1.08762e+07	6.85261e+06	9.19177e+06	9.45527e+06	7.44079e+06	1.95981e+07	2.20314e+07	1.16239e+07	2.57232e+07	1.63608e+07	2.132	1.09	0.00249937
2,6-Dimethylquinoline	C11 H11 N	157.089	5.762			2.80482e+06	3.17085e+06	3.0947e+06	2.79079e+06	1.57464e+06	7.29987e+06	5.95982e+06	2.51118e+06	8.45559e+06	3.44496e+06	2.125	1.09	0.046304
SATA	C8 H9 N O5 S	231.02	4.547			1.69065e+07	9.99255e+06	8.37365e+06	1.21736e+07	3.45045e+06	1.79631e+07	2.62358e+07	1.99983e+07	2.7877e+07	2.11743e+07	2.119	1.08	0.0243558
		149.05	5.269			1.70939e+07	1.51251e+07	2.3946e+07	8.92833e+06	3.64478e+06	3.20543e+07	3.36987e+07	2.06881e+07	4.81073e+07	3.12399e+07	2.119	1.08	0.0320999
	C18 H31 N5 O4	381.237	5.025			6.69973e+06	3.00506e+06	1.71331e+06	3.05173e+06	1.81457e+06	5.12318e+06	7.68095e+06	4.45138e+06	7.69975e+06	6.36717e+06	2.119	1.08	0.0324793
tert-Butyl (2-(6-(6-methyl-1,4-dihydro-1,2,4,5-tetrazin-3-yl)nicotinamido)ethyl)carbamate	C16 H23 N7 O3	361.185	4.998			2.26425e+06	3.05082e+06	3.25841e+06	1.44976e+06	909135	4.79447e+06	4.84483e+06	3.55114e+06	5.17807e+06	3.6037e+06	2.117	1.08	0.0272469
1,2-dihydroxyheptadec-16-yn-4-yl acetate	C19 H34 O4	308.235	24.585	73.5		2.90947e+06	2.32966e+06	5.32022e+06	2.62451e+06	3.3163e+06	6.13032e+06	5.4154e+06	9.69139e+06	1.07763e+07	3.61307e+06	2.107	1.08	0.0189808
	C12 H20 N O P S	257.101	1.841			3.77892e+07	1.29656e+07	1.95287e+07	1.85477e+07	1.49963e+07	3.51514e+07	4.74399e+07	2.20838e+07	5.03164e+07	3.90197e+07	2.104	1.07	0.0239044
	C31 H51 N4 O3 P3	620.317	5.564			1.25071e+06	1.42813e+06	1.68536e+06	797550	307822	2.63016e+06	3.23621e+06	1.69184e+06	2.70325e+06	2.09216e+06	2.103	1.07	0.0338459
3-amino-octanoic acid	C8 H17 N O2	159.126	1.886			2.69332e+08	1.70182e+08	1.35757e+08	1.3764e+08	1.18407e+08	2.99789e+08	2.80982e+08	2.59199e+08	2.89233e+08	3.44757e+08	2.101	1.07	0.0105338
Lauroylsarcosine	C15 H29 N O3	271.215	15.387			8.43246e+06	7.48053e+06	1.68341e+07	5.5194e+06	5.14471e+06	1.57049e+07	3.40412e+07	1.02777e+07	4.58224e+07	1.31671e+07	2.099	1.07	0.032062
	C11 H21 N O7 S	311.104	1.961			3.45898e+07	2.79556e+07	3.03005e+07	4.65471e+07	4.20026e+07	4.73255e+07	7.98534e+07	7.27369e+07	6.70007e+07	7.22767e+07	2.09	1.06	0.00143014
L-Glutathione	C12 H25 N3 O2 S2	307.138	1.159			4.019e+06	3.87611e+06	2.31086e+06	5.84054e+06	4.08349e+06	6.20897e+06	1.0181e+07	1.18195e+07	8.37981e+06	5.21175e+06	2.085	1.06	0.00896709
	C20 H27 N9 O6	489.207	4.97			2.16914e+07	1.60129e+07	1.5282e+07	9.18572e+06	5.86216e+06	3.1861e+07	3.26644e+07	2.33031e+07	3.95972e+07	2.74564e+07	2.085	1.06	0.014023
		189.099	1.249			1.10398e+07	1.01972e+07	1.33853e+07	1.00466e+07	7.00445e+06	1.9173e+07	1.87194e+07	2.15533e+07	2.90614e+07	2.12612e+07	2.085	1.06	0.00053895
	C19 H34 N O5 P S	419.19	2.132			8.17499e+06	3.974e+06	3.91185e+06	3.71948e+06	3.38536e+06	8.60515e+06	7.10029e+06	8.15728e+06	1.25858e+07	5.86848e+06	2.085	1.06	0.0158041
Icaridin	C12 H23 N O3	229.168	7.597			1.40131e+06	2.68647e+06	3.32841e+06	3.09454e+06	4.36241e+06	5.10361e+06	6.82482e+06	6.68941e+06	6.43528e+06	2.80875e+06	2.08	1.06	0.0349187
		143.057	5.268			1.93441e+07	1.71334e+07	2.76267e+07	1.11379e+07	5.95632e+06	3.56427e+07	3.39997e+07	2.35051e+07	4.98663e+07	3.62294e+07	2.08	1.06	0.024081
N-decanoyl-homoserine lactone	C14 H25 N O3	255.183	8.807			2.19634e+06	2.31405e+06	3.83546e+06	1.72316e+06	1.52182e+06	3.75576e+06	4.56248e+06	4.46628e+06	7.49041e+06	4.96204e+06	2.077	1.05	0.00424585
Indoline	C8 H9 N	119.074	3.813			5.61562e+07	4.24784e+07	3.0494e+07	2.95821e+07	1.47974e+07	6.32685e+07	1.37277e+08	5.24275e+07	1.08704e+08	4.27033e+07	2.075	1.05	0.0283351
	C17 H20 N2 O8	380.122	4.94			4.54363e+06	2.71691e+06	2.64113e+06	3.34096e+06	3.19224e+06	7.28135e+06	6.62035e+06	5.30516e+06	6.3421e+06	6.77885e+06	2.074	1.05	0.000687681
13-keto-9Z-octadecenoic acid	C18 H32 O3	296.235	18.731			8.29565e+07	7.72883e+07	1.47161e+08	6.95292e+07	7.06926e+07	1.43175e+08	1.46756e+08	2.27144e+08	1.60166e+08	1.66084e+08	2.072	1.05	0.0053238
1-Pentofuranosyl-2,4(1H,3H)-pyrimidinedione	C9 H12 N2 O6	244.069	1.252			8.29996e+07	6.97907e+07	5.6207e+07	5.01443e+07	4.3658e+07	1.1933e+08	1.20969e+08	8.20762e+07	1.16206e+08	7.13355e+07	2.067	1.05	0.0109789
Stachyline A	C13 H17 N O3	235.121	5.032			9.7101e+06	1.03603e+07	5.9551e+06	6.33811e+06	1.00035e+07	1.95295e+07	2.90015e+07	2.29815e+07	2.00653e+07	9.26141e+06	2.066	1.05	0.00854087
	C9 H6 N10 O5 S	366.025	5.189			1.77586e+07	7.30321e+06	5.20673e+06	6.849e+06	4.72496e+06	1.35546e+07	1.47657e+07	1.09873e+07	2.17331e+07	1.41218e+07	2.062	1.04	0.0400368
9-hydroxy-10-Octadecen-12-ynoic acid	C18 H30 O3	294.219	24.584			8.79581e+06	1.04509e+07	1.96284e+07	8.89668e+06	1.18684e+07	2.15339e+07	1.88041e+07	3.47909e+07	3.33661e+07	1.22354e+07	2.06	1.04	0.0248017
	C18 H32 N9 O7 P	517.217	6.284			3.65145e+06	2.20163e+06	1.4321e+06	2.51322e+06	1.13413e+06	3.93951e+06	7.0689e+06	3.35408e+06	5.48987e+06	4.52118e+06	2.054	1.04	0.0108721
D-(+)-Pyroglutamic Acid	C5 H7 N O3	129.043	17.766	81.2	C02237	2.70434e+07	4.28337e+07	4.60986e+07	2.17804e+07	2.25431e+07	4.14497e+07	7.22998e+07	5.15383e+07	6.08047e+07	5.54412e+07	2.05	1.04	0.0157973
	C33 H36 O4 P2	558.21	6.696			813582	2.28394e+06	2.0079e+06	2.80398e+06	2.25123e+06	5.71561e+06	4.96318e+06	3.74986e+06	4.59329e+06	4.02495e+06	2.04	1.03	0.0120667
4-Oxoproline	C5 H7 N O3	129.041	1.11	99.4		3.27941e+08	2.54555e+08	1.95519e+08	1.8939e+08	1.69187e+08	3.98404e+08	5.30887e+08	3.70209e+08	4.91543e+08	3.86348e+08	2.038	1.03	0.00236147
	C16 H22 N8 O3	374.18	5.255			1.22632e+06	2.29157e+06	2.10539e+06	3.51542e+06	2.38594e+06	4.73654e+06	4.6605e+06	3.24408e+06	4.88188e+06	2.77866e+06	2.034	1.02	0.0225707
HON	C5 H9 N O4	147.053	5.05			9.36416e+06	6.08875e+06	4.94132e+06	3.82158e+06	2.55094e+06	7.86279e+06	1.03905e+07	9.16666e+06	1.00454e+07	1.24552e+07	2.033	1.02	0.0287122
	C12 H19 N3 O8	333.117	1.218			6.66476e+06	3.99916e+06	2.81974e+06	3.40678e+06	1.52483e+06	6.87854e+06	9.19514e+06	6.01912e+06	8.81117e+06	4.67518e+06	2.019	1.01	0.0341236
Pt-1	C17 H24 N4 O3	332.185	4.415			3.20163e+07	2.08904e+07	1.78235e+07	1.5117e+07	6.74786e+06	3.59565e+07	4.17405e+07	2.95328e+07	4.26574e+07	2.92328e+07	2.017	1.01	0.0377832
	C15 H31 N6 O2 P	358.225	21.128			1.22057e+07	8.22684e+06	1.76436e+07	7.25633e+06	5.04739e+06	1.65938e+07	1.72283e+07	1.16646e+07	2.72142e+07	1.53446e+07	2.017	1.01	0.0487858
3-amino-octanoic acid	C8 H17 N O2	159.126	1.643			1.23682e+08	1.24561e+08	1.13504e+08	1.95634e+08	1.95955e+08	2.58269e+08	2.53654e+08	2.51083e+08	2.41696e+08	1.8678e+08	2.016	1.01	0.0119976
N-lauroyl glycine	C14 H27 N O3	257.199	8.327			7.72077e+06	1.12779e+07	1.15379e+07	1.29835e+07	1.84755e+07	2.21433e+07	2.89305e+07	2.32164e+07	3.12164e+07	1.16025e+07	2.012	1.01	0.0251368
Leuhistin	C11 H19 N3 O3	241.142	4.194			2.92369e+07	1.78733e+07	1.42201e+07	1.35453e+07	7.09422e+06	2.85995e+07	3.35321e+07	2.50198e+07	3.03287e+07	2.73121e+07	2.011	1.01	0.0423281
	C16 H36 N2 O6	352.26	24.628			1.46964e+07	1.12293e+07	1.09946e+07	8.0907e+06	7.62537e+06	2.20749e+07	2.00637e+07	2.28401e+07	2.71034e+07	2.01037e+07	2.008	1.01	0.00131114
	C20 H38 N2 O4	370.283	7.8			2.91853e+06	1.59428e+06	2.57986e+06	2.12222e+06	2.0574e+06	4.03679e+06	4.26101e+06	5.54365e+06	5.34631e+06	4.23333e+06	2.008	1.01	0.000579626
	C19 H26 O S2	334.141	6.234			2.61101e+06	2.80639e+06	2.76231e+06	3.78089e+06	2.96575e+06	7.20614e+06	5.60224e+06	4.41304e+06	4.6748e+06	7.18584e+06	1.996	1	0.00119733
Ambrette musk	C12 H16 N2 O5	268.106	5.304			6.17027e+06	3.67724e+06	2.22137e+06	3.23237e+06	2.12528e+06	3.84541e+06	6.1456e+06	6.4192e+06	6.80953e+06	7.29813e+06	1.986	0.99	0.0311697
	C27 H35 N7 O S2	537.232	6.223			2.07952e+06	1.49005e+06	1.82458e+06	469551	205421	2.95448e+06	3.67102e+06	2.87098e+06	4.2539e+06	2.52258e+06	1.983	0.99	0.0449613
	C12 H23 P S	230.126	5.004			1.02299e+07	8.87833e+06	1.09223e+07	6.39248e+06	2.28163e+06	1.49465e+07	1.95972e+07	1.04593e+07	2.02089e+07	1.75798e+07	1.98	0.99	0.0366309
		132.004	6.293			2.3031e+07	9.44024e+06	6.67447e+06	1.14346e+07	7.92516e+06	1.69601e+07	1.86896e+07	1.72725e+07	2.38224e+07	2.2204e+07	1.98	0.99	0.0422039
(E)-Diisopropyl azodicarboxylate	C8 H14 N2 O4	202.094	3.419			4.70716e+07	3.62338e+07	2.81377e+07	3.01794e+07	1.8497e+07	4.91037e+07	6.03175e+07	4.4598e+07	6.39913e+07	5.96508e+07	1.977	0.98	0.0149895
NP-008993	C18 H34 O4	336.227	18.722	98.7		6.2922e+07	5.19759e+07	9.37999e+07	4.15408e+07	3.9402e+07	8.71452e+07	1.02689e+08	1.32075e+08	1.01168e+08	1.06231e+08	1.976	0.98	0.0112387
	C9 H17 P S	188.079	1.271			2.81625e+07	2.81713e+07	2.95209e+07	1.55807e+07	8.65804e+06	5.56113e+07	4.26947e+07	4.28876e+07	7.05193e+07	7.49412e+07	1.975	0.98	0.00896806
Boc-Asn-Oh	C9 H16 N2 O5	232.106	2.593			4.94029e+07	2.94587e+07	1.56917e+07	4.37203e+07	1.78841e+07	7.44279e+07	6.26584e+07	3.5235e+07	5.81393e+07	4.61901e+07	1.974	0.98	0.0493397
Citrinalin A	C25 H31 N3 O5	453.226	5.7			2.05939e+06	2.346e+06	2.04633e+06	1.1598e+06	851521	3.28883e+06	4.02799e+06	4.09563e+06	3.28311e+06	5.93433e+06	1.968	0.98	0.00536928
		114.067	5.114			1.62418e+06	4.60728e+06	3.7898e+06	3.60262e+06	3.3879e+06	9.38333e+06	8.99504e+06	6.65241e+06	7.06404e+06	6.11008e+06	1.961	0.97	0.0057206
L-gamma-Glutamyl-S-methyl-L-cysteine	C9 H16 N2 O5 S	264.078	3.46			1.75239e+07	1.59343e+07	1.02877e+07	1.69788e+07	5.77838e+06	3.29059e+07	3.89856e+07	1.60539e+07	1.71124e+07	3.12247e+07	1.96	0.97	0.0309855
Malioxamycin	C9 H16 N2 O6	248.1	1.192			1.04671e+08	7.84863e+07	6.27601e+07	4.49151e+07	2.02787e+07	1.22602e+08	1.44279e+08	8.93887e+07	1.53039e+08	1.12775e+08	1.953	0.97	0.0423075
	C5 H13 N10 O2 P	276.096	1.746			1.24601e+07	2.07274e+07	1.33382e+07	9.70499e+06	9.74744e+06	2.4665e+07	2.4325e+07	2.17807e+07	3.14154e+07	2.23623e+07	1.952	0.97	0.00545979
16-methyl-6Z,9Z,12Z-heptadecatrienoic acid	C18 H30 O2	278.224	23.793			4.0777e+07	2.83227e+07	4.49756e+07	2.95052e+07	2.76552e+07	5.10072e+07	5.75792e+07	6.82162e+07	1.2806e+08	5.56571e+07	1.951	0.96	0.00941264
3097-B2	C14 H19 N O4	265.131	4.582			1.83408e+06	1.46218e+06	1.88096e+06	1.97187e+06	2.87567e+06	2.29338e+06	3.66619e+06	4.52144e+06	6.87258e+06	2.62042e+06	1.949	0.96	0.0287822
		85.0898	4.514			2.88372e+08	2.01755e+08	1.77059e+08	1.11525e+08	4.50863e+07	2.55564e+08	6.17989e+08	4.42436e+08	3.45077e+08	2.81646e+08	1.949	0.96	0.0350138
NP-020112	C30 H48 O2	422.354	14.02	82.3		1.88301e+07	1.09668e+07	8.38896e+06	9.11523e+06	8.64644e+06	1.94986e+07	1.32019e+07	1.87698e+07	1.77488e+07	1.50365e+07	1.947	0.96	0.0372746
	C13 H21 N4 O6 P	360.121	6.981			1.02394e+06	2.0112e+06	2.92994e+06	2.11489e+06	2.16409e+06	4.89865e+06	4.11566e+06	3.65326e+06	4.75659e+06	2.47969e+06	1.946	0.96	0.0135098
N,N-diethyl-3-hydroxybut-2-enamide	C8 H15 N O2	157.11	1.721			9.9799e+08	8.25568e+08	7.69453e+08	4.98433e+08	4.67428e+08	1.49626e+09	1.4954e+09	1.40165e+09	1.81269e+09	1.89049e+09	1.945	0.96	0.0025672
Tridecylic acid	C13 H26 O2	214.193	26.987			7.46337e+07	4.52131e+07	5.68889e+07	2.45536e+07	1.99241e+07	8.78123e+07	7.66663e+07	7.54953e+07	9.56102e+07	1.00789e+08	1.942	0.96	0.0322292
Citric acid	C6 H8 O7	192.026	2.4	97.8		1.44236e+08	1.03046e+08	1.25407e+08	1.45014e+08	1.45181e+08	2.69646e+08	3.58477e+08	2.34315e+08	3.10013e+08	2.80072e+08	1.942	0.96	4.38074e-05
strobide B	C11 H10 O7	254.042	6.292			1.58193e+08	6.67971e+07	4.86126e+07	7.33728e+07	5.39908e+07	1.16879e+08	1.29679e+08	1.18888e+08	1.5801e+08	1.47169e+08	1.941	0.96	0.0411358
Epi-Leucinopine	C11 H19 N O6	261.121	1.722			1.32759e+08	8.77537e+07	1.11241e+08	1.36068e+08	1.0652e+08	1.43766e+08	2.30846e+08	2.17179e+08	2.15398e+08	2.09088e+08	1.936	0.95	0.0012232
	C6 H23 N9 O4 S	317.159	4.529			5.45971e+06	4.47206e+06	4.60785e+06	2.31378e+06	921336	6.43088e+06	1.07626e+07	5.61201e+06	8.74068e+06	8.63219e+06	1.93	0.95	0.0401825
	C2 H6 N9 O3 P	235.033	1.114			2.78204e+06	2.43896e+06	2.01824e+06	2.73392e+06	2.47588e+06	4.70479e+06	7.15167e+06	4.77917e+06	5.70239e+06	4.23562e+06	1.93	0.95	0.000284187
Elaiomycin H	C12 H25 N3 O3	259.189	2.272			5.70958e+08	3.25941e+08	2.372e+08	3.39502e+08	1.78018e+08	6.28195e+08	7.40999e+08	4.87791e+08	6.39498e+08	4.83683e+08	1.927	0.95	0.0247197
Pestalotiopamide E	C11 H17 N O5	243.11	5.907			3.59811e+06	3.80851e+06	4.53349e+06	1.70142e+06	586253	7.68955e+06	6.93137e+06	5.0733e+06	8.46161e+06	6.7698e+06	1.926	0.95	0.0418065
Citrulline	C6 H13 N3 O3	175.096	1.103	73	C00327	1.68389e+08	1.62095e+08	9.9888e+07	1.87789e+08	1.72053e+08	2.80208e+08	3.45758e+08	3.29026e+08	3.24313e+08	2.07643e+08	1.926	0.95	0.00247934
	C10 H17 N O8	279.095	1.159			1.60877e+07	1.14207e+07	5.35388e+06	1.50041e+07	1.32023e+07	1.84556e+07	2.54231e+07	3.10241e+07	2.96866e+07	1.47895e+07	1.926	0.95	0.0235178
γ-L-glutamyl-L-leucine	C11 H20 N2 O5	260.137	4.373			5.85941e+07	3.55546e+07	2.95569e+07	2.74458e+07	1.39971e+07	5.68045e+07	7.67014e+07	4.05175e+07	7.15012e+07	5.06583e+07	1.922	0.94	0.0440352
Ficiolide K	C14 H22 O7	302.138	3.77			5.28298e+07	3.24331e+07	2.79279e+07	2.70628e+07	1.06366e+07	4.70758e+07	6.91712e+07	5.34366e+07	6.61559e+07	4.63876e+07	1.913	0.94	0.0456291
Lipoamide C	C17 H32 N2 O4	328.236	7.244			3.22816e+06	2.21433e+06	4.27951e+06	2.04135e+06	2.55462e+06	4.8833e+06	5.09714e+06	3.32468e+06	6.28571e+06	3.72566e+06	1.912	0.93	0.0227625
LLK	C18 H36 N4 O4	372.273	4.964	81.6		3.18742e+07	1.69809e+07	1.67925e+07	1.34182e+07	5.39662e+06	3.20989e+07	3.66724e+07	3.12503e+07	4.53814e+07	3.04557e+07	1.911	0.93	0.0367311
Glycine	C2 H5 N O2	75.0307	1.314	99.9		2.85612e+07	2.83081e+07	4.65415e+07	1.6669e+07	8.91965e+06	4.1459e+07	5.40661e+07	3.44896e+07	9.18395e+07	6.00843e+07	1.91	0.93	0.0353571
DL-Stachydrine	C7 H13 N O2	143.095	1.191	98.4		3.57981e+09	2.70746e+09	1.92411e+09	2.19013e+09	1.97337e+09	2.75697e+09	3.26588e+09	4.32229e+09	4.17002e+09	6.58563e+09	1.904	0.93	0.0262756
14-hydroxy-12-tetradecenoic acid	C14 H26 O3	242.188	24.171			1.66603e+07	1.87784e+07	2.36987e+07	5.57796e+06	4.94895e+06	2.78741e+07	3.26715e+07	3.16921e+07	4.11562e+07	2.50702e+07	1.902	0.93	0.0359378
		104.01	6.292			2.46259e+07	1.07464e+07	7.21751e+06	1.21071e+07	9.15235e+06	1.75148e+07	2.0435e+07	2.00018e+07	2.51356e+07	2.41702e+07	1.902	0.93	0.0404071
(1,3-Dioxo-1,3-dihydro-2H-isoindol-2-yl)methyl ethyl heptylphosphonate	C18 H26 N O5 P	367.153	5.704			4.90959e+06	3.04171e+06	2.55262e+06	2.5751e+06	1.69164e+06	4.60158e+06	6.00232e+06	4.76887e+06	4.89331e+06	5.24339e+06	1.9	0.93	0.0224263
	C15 H23 N3 O14	469.118	3.606			1.21423e+07	7.66412e+06	1.07025e+07	5.49142e+06	5.15259e+06	1.44941e+07	1.1779e+07	1.81546e+07	9.0979e+06	1.67844e+07	1.891	0.92	0.0315645
	C11 H21 N O7	279.132	1.723			6.3938e+07	4.25901e+07	5.68755e+07	6.8552e+07	5.35679e+07	7.0269e+07	1.12214e+08	1.12807e+08	1.05016e+08	1.07481e+08	1.89	0.92	0.00152007
	C11 H13 N7 O2	275.112	1.165			4.92258e+07	3.40444e+07	2.28143e+07	2.79721e+07	2.0974e+07	4.95348e+07	6.4938e+07	5.22392e+07	5.5163e+07	5.288e+07	1.89	0.92	0.0132405
N-lauroyl glycine	C14 H27 N O3	257.199	8.875			9.47622e+06	1.48376e+07	1.54246e+07	1.72819e+07	2.20379e+07	2.91286e+07	3.41196e+07	2.85547e+07	3.61506e+07	1.55451e+07	1.888	0.92	0.0198506
Ornithine	C5 H12 N2 O2	132.088	1.103	94		2.17583e+08	2.08713e+08	9.1748e+07	1.77225e+08	1.45785e+08	3.33779e+08	4.24434e+08	3.93465e+08	2.77874e+08	1.7184e+08	1.883	0.91	0.0214911
	C6 H22 N7 O4 P S	319.12	4.718			3.0264e+06	3.86254e+06	2.61673e+06	3.24917e+06	2.30054e+06	5.69018e+06	6.85346e+06	3.48165e+06	7.48247e+06	4.18153e+06	1.88	0.91	0.0119834
Cinnabaramide A	C19 H29 N O4	335.209	15.949			2.72278e+07	2.3542e+07	3.38622e+07	2.1274e+07	1.5649e+07	4.422e+07	4.67087e+07	2.91456e+07	7.4234e+07	4.29747e+07	1.878	0.91	0.0105945
	C42 H58 N4 O12	810.404	11.043			1.70187e+07	1.4587e+07	1.57871e+07	1.44605e+07	1.45181e+07	2.7262e+07	3.38526e+07	2.19852e+07	4.01818e+07	2.33168e+07	1.869	0.9	0.00390987
	C9 H15 P S	186.063	2.571			3.89732e+07	3.06608e+07	3.15092e+07	2.0753e+07	1.15668e+07	5.0279e+07	6.07491e+07	4.5997e+07	5.82885e+07	5.72648e+07	1.868	0.9	0.0192349
		147.052	1.115			8.78321e+08	6.35126e+08	8.05832e+08	7.04429e+08	6.50226e+08	1.31499e+09	1.56792e+09	1.11361e+09	1.44448e+09	1.04979e+09	1.867	0.9	0.000487972
2'-Deoxy-5,6-dihydrouridine	C9 H14 N2 O5	230.09	2.579			8.90963e+07	7.39485e+07	9.43413e+07	5.22705e+07	3.01314e+07	9.81698e+07	1.51554e+08	1.17764e+08	1.48483e+08	1.38013e+08	1.866	0.9	0.0231642
	C6 H12 O6 S	212.035	5.287			1.13035e+07	5.17348e+06	4.78052e+06	4.83025e+06	3.46318e+06	9.01545e+06	9.14078e+06	8.00584e+06	1.26638e+07	8.39892e+06	1.866	0.9	0.0484762
		149.05	1.46			2.39157e+07	1.54904e+07	1.76065e+07	1.39987e+07	8.6316e+06	2.92286e+07	2.70061e+07	1.88159e+07	3.42764e+07	2.88494e+07	1.862	0.9	0.0211651
Sakacin P	C9 H16 N2 O4	216.11	3.651			6.59158e+06	1.27711e+07	1.70618e+07	9.31628e+06	5.02693e+06	1.73228e+07	1.16379e+07	1.75019e+07	1.63394e+07	3.80231e+07	1.859	0.89	0.0453729
		71.0743	5.169			3.42684e+07	2.74396e+07	3.1411e+07	2.49804e+07	2.70293e+07	5.47305e+07	4.94444e+07	5.10085e+07	6.49373e+07	4.82977e+07	1.859	0.89	4.86727e-05
	C11 H29 N5 O4 P2 S	389.143	4.053			6.67788e+06	4.0467e+06	3.94452e+06	2.67428e+06	1.54394e+06	7.3182e+06	7.781e+06	4.83541e+06	1.06098e+07	6.23049e+06	1.855	0.89	0.0352041
6-Hydroxymelatonin	C13 H16 N2 O3	248.119	4.29	64.3		2.61754e+07	1.62229e+07	1.77139e+07	9.38271e+06	5.4063e+06	2.92452e+07	3.76154e+07	2.62072e+07	3.90412e+07	3.00762e+07	1.854	0.89	0.0284757
Epinephrine	C9 H13 N O3	183.09	4.101		C00547	2.57514e+06	2.13659e+06	2.29293e+06	2.63055e+06	1.9864e+06	4.23954e+06	4.86968e+06	4.1312e+06	7.36181e+06	4.14507e+06	1.849	0.89	0.00109032
Dimethyl 2-benzyl-3-(4-methyl-2,5-dioxo-1-imidazolidinyl)succinate	C17 H20 N2 O6	348.132	4.779			2.71388e+07	1.36035e+07	2.07708e+07	2.58342e+07	1.66405e+07	2.63427e+07	4.59488e+07	3.80704e+07	3.84764e+07	3.78659e+07	1.833	0.87	0.00662078
	C15 H31 N O S	273.213	24.464			1.32297e+07	1.1441e+07	1.41083e+07	1.49894e+07	1.31349e+07	3.27109e+07	2.42499e+07	1.75693e+07	2.56955e+07	1.76165e+07	1.833	0.87	0.00758071
	C18 H25 N7 O3 S	419.173	6.887			3.08029e+06	2.6343e+06	1.20255e+06	2.64196e+06	1.75943e+06	4.80832e+06	5.60495e+06	4.41617e+06	5.73999e+06	3.38349e+06	1.825	0.87	0.00654487
Lipoamide C	C17 H32 N2 O4	328.236	6.841			8.20488e+06	4.33491e+06	5.62153e+06	5.03898e+06	5.41401e+06	9.86973e+06	1.06735e+07	6.52327e+06	1.29535e+07	9.02747e+06	1.823	0.87	0.00839788
Υ-Aminobutyric acid (GABA)	C4 H9 N O2	103.062	1.108	99.3		1.30876e+08	1.19627e+08	1.03573e+08	1.02857e+08	9.57081e+07	1.88469e+08	2.29787e+08	1.59362e+08	2.09589e+08	1.49098e+08	1.82	0.86	0.00109624
	C37 H59 N7 O13	809.416	4.979			6.61418e+06	4.30846e+06	3.33172e+06	3.75647e+06	5.60156e+06	8.67215e+06	7.83302e+06	7.83847e+06	1.00976e+07	7.27887e+06	1.819	0.86	0.0061458
Belactosin A	C17 H27 N3 O6	369.191	8.173			7.28438e+06	6.99525e+06	1.07239e+07	1.09756e+07	8.74069e+06	1.66824e+07	1.58938e+07	1.23268e+07	1.77107e+07	8.48488e+06	1.818	0.86	0.0295462
N-stearoyl serine	C21 H41 N O4	371.303	17.594			1.7073e+07	1.33698e+07	1.68303e+07	1.92554e+07	2.021e+07	3.09994e+07	2.16885e+07	3.61771e+07	3.27997e+07	2.80514e+07	1.816	0.86	0.00152175
		154.037	1.256			1.37062e+07	1.21042e+07	1.13213e+07	9.42148e+06	5.79129e+06	2.0554e+07	2.27299e+07	1.65252e+07	2.12718e+07	8.98209e+06	1.816	0.86	0.0472163
Myristamide	C14 H29 N O	227.225	24.306			1.40651e+08	8.41195e+07	1.69352e+08	1.82197e+08	1.55301e+08	4.6189e+08	2.97822e+08	2.73815e+08	2.80243e+08	2.59127e+08	1.805	0.85	0.00237122
Met-Leu	C11 H22 N2 O3 S	262.135	5.284			5.70907e+06	3.84716e+06	4.17028e+06	3.14235e+06	1.39278e+06	6.12084e+06	7.01197e+06	7.38307e+06	6.93781e+06	6.7521e+06	1.803	0.85	0.0375149
4E,6E,10Z-Hexadecatrien-1-ol	C16 H28 O	236.214	22.498			1.16142e+07	1.06672e+07	2.24124e+07	6.91658e+06	5.10457e+06	2.40473e+07	1.89707e+07	1.92373e+07	1.89791e+07	2.06554e+07	1.803	0.85	0.046255
(4E,6E,d14:2) sphingosine	C14 H27 N O2	241.204	7.943			3.74386e+06	3.86605e+06	3.06943e+06	3.11699e+06	2.9103e+06	5.26688e+06	6.00618e+06	4.82728e+06	5.61033e+06	5.87267e+06	1.8	0.85	0.000153072
	C15 H31 N O2 S	289.207	16.802			8.28271e+06	8.96531e+06	7.5825e+06	4.43195e+06	4.01476e+06	1.6519e+07	1.35838e+07	1.00501e+07	1.4161e+07	7.54607e+06	1.791	0.84	0.020078
n-decanohydroxamic acid	C10 H21 N O2	187.157	8.295			4.40502e+06	7.19368e+06	6.18815e+06	6.52291e+06	9.26453e+06	1.16451e+07	1.38411e+07	1.04591e+07	1.4092e+07	6.12545e+06	1.785	0.84	0.0335016
Trp-Trp	C22 H22 N4 O3	390.169	6.727			1.12588e+07	6.67052e+06	6.23772e+06	4.13694e+06	2.40319e+06	1.04989e+07	1.2468e+07	9.47634e+06	1.29189e+07	1.11262e+07	1.784	0.83	0.0459812
Biotin sulfoxide	C10 H16 N2 O4 S	260.083	5.081			3.00596e+07	2.44998e+07	2.58645e+07	1.55755e+07	9.95346e+06	4.02707e+07	4.85053e+07	4.36146e+07	5.11365e+07	4.30383e+07	1.78	0.83	0.0135074
Glutarylcarnitine	C12 H21 N O6	275.137	3.236			7.9487e+08	3.4062e+08	6.22447e+08	7.44625e+08	5.50504e+08	1.14752e+09	1.3332e+09	1.07519e+09	1.00373e+09	1.10657e+09	1.778	0.83	0.00975104
N~2~-Tetradecanoyl-D-asparagine	C18 H34 N2 O4	342.252	7.103			6.35404e+06	4.1843e+06	4.47261e+06	5.59256e+06	6.74578e+06	8.04183e+06	9.94024e+06	1.56765e+07	1.18044e+07	9.28568e+06	1.777	0.83	0.00189941
	C9 H28 N7 O6 P	361.185	5.259			8.71276e+07	6.0044e+07	2.91338e+07	4.62693e+07	4.71113e+07	8.36822e+07	9.59187e+07	7.97667e+07	1.02347e+08	6.0333e+07	1.776	0.83	0.0493745
	C9 H16 N8 O3 S	316.108	2.334			1.09109e+07	8.47458e+06	1.0813e+07	4.56748e+06	1.74336e+06	1.31132e+07	1.48482e+07	1.6425e+07	1.50516e+07	2.08394e+07	1.776	0.83	0.0483615
	C11 H27 N9 O2 S2	381.173	23.546			4.67033e+06	3.33844e+06	4.2773e+06	4.1794e+06	3.90158e+06	7.24522e+06	6.05595e+06	7.39601e+06	7.68156e+06	1.0229e+07	1.77	0.82	0.000449892
	C13 H24 N4 O P2 S	346.116	6.426			4.09727e+06	3.17245e+06	2.746e+06	2.63753e+06	2.52414e+06	5.50262e+06	3.12621e+06	4.84309e+06	5.40891e+06	4.66937e+06	1.764	0.82	0.0124373
	C15 H19 P S	262.095	5.07			6.69655e+06	5.30597e+06	6.51872e+06	3.82418e+06	2.97114e+06	8.96503e+06	8.73246e+06	1.15617e+07	1.18083e+07	9.35676e+06	1.763	0.82	0.00691723
Methylmalonic acid	C4 H6 O4	118.025	2.73	97		4.86678e+09	4.4725e+09	5.74301e+09	3.24504e+09	2.35925e+09	8.11197e+09	7.88178e+09	4.69432e+09	9.14969e+09	6.60477e+09	1.762	0.82	0.0190763
N-(3-hydroxy-decanoyl)-homoserine lactone	C14 H25 N O4	271.178	8.41			5.22851e+06	3.72334e+06	4.45466e+06	4.17163e+06	4.42908e+06	7.22888e+06	8.47911e+06	7.77761e+06	8.17222e+06	4.50172e+06	1.756	0.81	0.0105198
Monocillinol B	C11 H13 N O5	239.079	4.663			3.03646e+06	6.44322e+06	4.89134e+06	5.60845e+06	5.1858e+06	1.26046e+07	1.04351e+07	6.13833e+06	7.50688e+06	9.07512e+06	1.75	0.81	0.0102631
NP-012972	C14 H24 O3	222.162	23.519	69.1		8.3202e+06	1.10733e+07	1.30519e+07	1.0232e+07	1.25923e+07	1.7057e+07	1.9355e+07	2.49866e+07	3.10894e+07	1.49753e+07	1.748	0.81	0.00481654
Riboflavin	C17 H20 N4 O6	376.138	5.557			5.76228e+07	8.22983e+07	1.01639e+08	6.4838e+07	6.90195e+07	1.33515e+08	1.20598e+08	8.2721e+07	1.34935e+08	9.1035e+07	1.747	0.81	0.0211528
Lipoamide C	C17 H32 N2 O4	328.236	7.017			4.10511e+06	2.93005e+06	4.23081e+06	3.10047e+06	3.37196e+06	5.65104e+06	5.87268e+06	5.88975e+06	7.45048e+06	4.67057e+06	1.742	0.8	0.00124759
Akodionine	C10 H16 N2 O2	196.121	5.695			7.97384e+06	6.95032e+06	7.51565e+06	3.80729e+06	2.15379e+06	9.54362e+06	1.37447e+07	1.10021e+07	1.56762e+07	1.21067e+07	1.742	0.8	0.0223046
4-methoxyacetanilide	C9 H11 N O2	165.079	5.984			1.88448e+07	1.32746e+07	1.52046e+07	9.36485e+06	5.54632e+06	2.29958e+07	2.68401e+07	2.3126e+07	3.18371e+07	2.0088e+07	1.742	0.8	0.0197051
		74.0354	2.734			1.29238e+09	1.2206e+09	1.58191e+09	6.96948e+08	6.16289e+08	2.22846e+09	2.12463e+09	1.24946e+09	2.52759e+09	1.82441e+09	1.741	0.8	0.0222177
		100.015	2.769			2.53757e+08	2.44491e+08	3.13885e+08	1.42221e+08	1.301e+08	4.3986e+08	4.25266e+08	2.47394e+08	4.93243e+08	3.60777e+08	1.739	0.8	0.0203264
Valpromide	C8 H17 N O	143.131	9.068			5.7513e+06	4.20983e+06	5.88632e+06	5.2193e+06	4.72299e+06	9.03255e+06	1.129e+07	6.6219e+06	1.07966e+07	5.65795e+06	1.731	0.79	0.0181122
	C37 H50 N4 O8	678.362	12.309			1.39249e+07	1.0849e+07	1.32174e+07	1.12473e+07	1.2613e+07	2.18315e+07	2.49187e+07	1.78422e+07	3.27284e+07	1.91453e+07	1.731	0.79	0.0025692
		71.0742	1.634			3.95676e+09	2.71989e+09	3.86786e+09	2.63723e+09	1.71629e+09	3.92353e+09	4.70111e+09	3.52299e+09	5.76193e+09	4.72695e+09	1.728	0.79	0.0410907
	C6 H20 N7 O4 P	285.132	4.598			5.21841e+06	4.73686e+06	3.90295e+06	2.80864e+06	1.32624e+06	5.57598e+06	8.30321e+06	5.20357e+06	7.11832e+06	6.73883e+06	1.727	0.79	0.0458894
Methyl 2-acetamido-2-deoxy-beta-D-glucopyranoside	C9 H17 N O6	235.105	3.956			3.87603e+06	3.41191e+06	2.03006e+06	3.25895e+06	1.9824e+06	5.62005e+06	7.05742e+06	5.22674e+06	6.12547e+06	4.19232e+06	1.724	0.79	0.00467043
	C9 H17 P S	188.079	1.722			1.79576e+07	1.4435e+07	1.43777e+07	1.09174e+07	6.79098e+06	2.22285e+07	1.93821e+07	2.47096e+07	2.73676e+07	3.83784e+07	1.719	0.78	0.00808044
DL-Stachydrine	C7 H13 N O2	143.095	1.879	87.4		5.26089e+08	2.59258e+08	3.32057e+08	3.9876e+08	4.13507e+08	4.1315e+08	5.05351e+08	6.81438e+08	7.61962e+08	1.26013e+09	1.709	0.77	0.0375323
	C17 H23 N7 O4	389.18	5.101			2.7618e+07	1.98152e+07	1.51849e+07	1.40958e+07	1.05874e+07	2.59087e+07	2.58871e+07	2.39532e+07	3.00692e+07	2.72454e+07	1.706	0.77	0.0419363
	C8 H26 N7 O5 P	331.174	4.924			1.22133e+07	1.21264e+07	1.25934e+07	7.55134e+06	3.89524e+06	2.09078e+07	2.08393e+07	1.66179e+07	1.87964e+07	2.06429e+07	1.702	0.77	0.0240585
LMST01031183	C29 H44 O4	456.324	7.632			6.81841e+06	5.14217e+06	7.01257e+06	4.62932e+06	5.73413e+06	9.75566e+06	6.93932e+06	1.17885e+07	2.93428e+07	8.65764e+06	1.701	0.77	0.0484644
[5-(3-Amino-5-methyl-1,4,5,6,8-pentaazaacenaphthylen-1(5H)-yl)tetrahydro-2-furanyl]methanol	C13 H16 N6 O2	288.132	4.829			8.20933e+06	4.78269e+06	5.60879e+06	3.09293e+06	1.98921e+06	9.45661e+06	8.13161e+06	6.00193e+06	1.25359e+07	8.07054e+06	1.7	0.77	0.0421782
L-Phenylalanine	C9 H11 N O2	165.078	4.205	99.7		9.91715e+08	7.47989e+08	8.50789e+08	5.29728e+08	2.92603e+08	1.24039e+09	1.40535e+09	1.05138e+09	1.60392e+09	1.26753e+09	1.695	0.76	0.025536
18S-hydroxyneodihydroprotolichesterinic acid	C21 H38 O5	370.272	24.39			1.04555e+07	1.1015e+07	1.1049e+07	8.1083e+06	4.44879e+06	1.77195e+07	1.59888e+07	1.33057e+07	2.03523e+07	2.70811e+07	1.695	0.76	0.00825863
	C16 H32 N4 O3	328.247	7.855			3.09321e+07	1.8955e+07	1.94465e+07	1.88523e+07	1.50666e+07	3.20952e+07	2.71363e+07	2.93294e+07	3.60285e+07	4.45429e+07	1.693	0.76	0.00961884
Benserazide	C10 H15 N3 O5	257.101	1.282			2.79489e+07	2.39904e+07	1.98195e+07	1.46602e+07	1.07681e+07	3.03537e+07	3.64477e+07	2.60646e+07	3.69749e+07	3.34602e+07	1.688	0.76	0.0263798
	C20 H16 N4 O4	376.116	5.991			4.05417e+06	1.51893e+07	1.19229e+07	1.76488e+07	1.68373e+07	3.03154e+07	2.35177e+07	2.56059e+07	2.82296e+07	1.93524e+07	1.686	0.75	0.0466732
Cyclo-(glycyl-L-prolyl-L-glutamyl)	C12 H17 N3 O5	283.117	4.346			8.45682e+06	6.87522e+06	8.73724e+06	3.84325e+06	2.07801e+06	1.14585e+07	1.15877e+07	8.58455e+06	1.34901e+07	1.35125e+07	1.685	0.75	0.0434846
	C17 H22 N2 O7	366.143	4.775			9.05987e+07	4.21418e+07	7.37132e+07	7.60636e+07	5.63306e+07	8.27493e+07	1.28692e+08	1.24112e+08	1.29333e+08	1.20668e+08	1.684	0.75	0.00947082
trans-Cinnamic acid	C9 H8 O2	148.051	4.204	79		8.09977e+07	5.73708e+07	6.73495e+07	4.01041e+07	2.19064e+07	9.63596e+07	1.09118e+08	7.81109e+07	1.21664e+08	9.65792e+07	1.683	0.75	0.0340008
	C9 H15 P S	186.063	1.164			2.68174e+07	1.715e+07	1.41819e+07	1.76722e+07	1.28008e+07	2.884e+07	3.28498e+07	2.34564e+07	3.55783e+07	2.31838e+07	1.682	0.75	0.0133482
L-Norleucine	C6 H13 N O2	131.095	4.471	99.7	C01933	3.84395e+08	2.7072e+08	2.41225e+08	1.50593e+08	9.8535e+07	5.25831e+08	3.65235e+08	2.49041e+08	6.00544e+08	4.03995e+08	1.675	0.74	0.0461572
Boc-Gln-Oh	C10 H18 N2 O5	246.121	4.571			2.95959e+07	1.99748e+07	1.70097e+07	2.43318e+07	8.99351e+06	3.53002e+07	3.9516e+07	2.73094e+07	3.34471e+07	3.22381e+07	1.674	0.74	0.042777
Streptomyceamide C	C14 H18 N2 O6	310.116	4.366			3.32575e+07	2.5803e+07	1.89249e+07	2.87072e+07	2.65524e+07	4.43831e+07	5.26736e+07	3.85023e+07	5.19192e+07	4.20423e+07	1.672	0.74	0.00164242
1,2-dihydroxyheptadec-16-yn-4-yl acetate	C19 H34 O4	348.227	22.518	86.2		4.90314e+06	3.33532e+06	3.80984e+06	1.75763e+06	1.43392e+06	5.91951e+06	4.95191e+06	5.48299e+06	8.84698e+06	5.57586e+06	1.672	0.74	0.0249828
1,3-Dimethyl-7-[(5-methyl-1,2,4-oxadiazol-3-yl)methyl]-3,7-dihydro-1H-purine-2,6-dione	C11 H12 N6 O3	276.096	2.382			6.8453e+07	1.02674e+08	8.14145e+07	5.66405e+07	2.84982e+07	1.34991e+08	1.0025e+08	8.41809e+07	1.55704e+08	1.13444e+08	1.657	0.73	0.0455095
4-keto pentadecanoic acid	C15 H28 O3	256.204	24.211			2.43141e+07	2.38252e+07	3.09641e+07	1.60108e+07	1.2602e+07	3.5855e+07	4.3362e+07	3.94304e+07	5.41767e+07	3.26459e+07	1.655	0.73	0.00951409
NSC 622050	C16 H31 N O3	285.23	12.325			5.19941e+06	9.44801e+06	7.75796e+06	8.44902e+06	9.69535e+06	1.39776e+07	1.73075e+07	1.11272e+07	1.87654e+07	9.1255e+06	1.654	0.73	0.0159483
	C39 H32 N4 O17	828.175	6.833			1.16809e+07	6.40325e+06	6.07152e+06	4.4844e+06	3.07426e+06	9.96406e+06	1.00419e+07	8.52583e+06	1.32152e+07	1.17217e+07	1.654	0.73	0.0478462
2-Aminotetralin	C10 H13 N	147.105	5.756			4.37587e+06	7.67024e+06	7.09078e+06	6.01391e+06	2.4921e+06	9.05503e+06	9.93175e+06	1.17314e+07	1.26341e+07	9.16096e+06	1.651	0.72	0.0229757
DPA	C12 H23 N O2	213.173	8.518			4.4214e+06	2.64823e+06	3.98027e+06	4.05478e+06	4.05032e+06	6.68479e+06	8.16803e+06	5.61352e+06	7.7054e+06	4.63219e+06	1.65	0.72	0.00503565
1,3-Dimethyl-7-[(5-methyl-1,2,4-oxadiazol-3-yl)methyl]-3,7-dihydro-1H-purine-2,6-dione	C11 H12 N6 O3	276.096	1.212			3.78375e+07	3.25183e+07	3.95269e+07	2.13187e+07	1.45808e+07	5.3388e+07	6.95084e+07	4.37416e+07	7.22759e+07	4.6775e+07	1.642	0.72	0.0155821
	C23 H53 N6 O15 P	684.332	3.941			3.53728e+06	2.22542e+06	2.43711e+06	2.3829e+06	2.66856e+06	4.52524e+06	3.86319e+06	3.99354e+06	5.46846e+06	3.47362e+06	1.639	0.71	0.00280687
N-acetyl-3-amino-3,6-dideoxy-d-galactose	C8 H15 N O5	205.095	1.094			1.46618e+07	2.65915e+07	3.46877e+07	3.3017e+07	2.88475e+07	4.87693e+07	5.96919e+07	4.71054e+07	3.80689e+07	4.48016e+07	1.633	0.71	0.0158951
	C10 H15 N O6	245.09	4.235			4.14167e+06	4.26396e+06	1.95987e+06	3.16025e+06	3.24432e+06	5.2947e+06	6.10998e+06	5.64623e+06	5.05424e+06	4.854e+06	1.632	0.71	0.0194592
	C6 H8 N10 O3	268.079	1.183			3.87428e+07	2.38547e+07	1.77826e+07	2.37568e+07	2.20166e+07	3.80072e+07	4.92491e+07	5.10821e+07	3.87195e+07	3.71104e+07	1.63	0.7	0.00833616
(2R)-2,3-Dihydroxypropanoic acid	C3 H6 O4	106.025	1.187	67.6		7.34611e+07	6.52706e+07	6.81652e+07	6.62263e+07	5.83534e+07	1.18552e+08	9.66658e+07	1.0765e+08	1.47148e+08	9.83301e+07	1.625	0.7	0.000925835
N-(3-hydroxy-dodecanoyl)-homoserine lactone	C16 H29 N O4	299.209	8.751			5.2105e+06	4.13798e+06	4.48836e+06	2.97146e+06	2.63e+06	6.72136e+06	7.82463e+06	4.93866e+06	8.64725e+06	5.14798e+06	1.624	0.7	0.0127446
	C8 H26 N7 O6 P	347.169	5.391			6.60873e+06	5.82757e+06	5.41228e+06	3.87733e+06	1.8638e+06	8.78288e+06	8.88655e+06	6.69079e+06	1.07335e+07	7.08281e+06	1.623	0.7	0.0425402
Cyclo-(L-Tyrosyl-cis-4-hydroxy-D-proline	C14 H16 N2 O4	276.111	6.226			1.17337e+08	9.02174e+07	9.85094e+07	5.66056e+07	3.26007e+07	1.46255e+08	1.9215e+08	1.36037e+08	1.93174e+08	1.40526e+08	1.621	0.7	0.0230995
13(S)-HOTrE	C18 H30 O3	294.219	22.016	85.9	C16316	1.17018e+07	6.51509e+06	1.02211e+07	8.42094e+06	9.80602e+06	1.58756e+07	1.86683e+07	1.53734e+07	1.84496e+07	9.33158e+06	1.619	0.7	0.0155563
Acetyl-D-carnitine	C9 H17 N O4	203.115	3.251			6.0648e+07	5.61377e+07	4.94853e+07	6.0821e+07	4.83432e+07	6.7188e+07	9.55762e+07	9.84672e+07	8.90716e+07	9.08214e+07	1.618	0.69	0.000754029
	C8 H11 N5 O7 P2	351.014	1.775			9.82759e+06	1.07654e+07	1.30382e+07	7.64621e+06	5.39692e+06	1.58773e+07	1.64715e+07	1.53823e+07	1.63273e+07	1.43947e+07	1.616	0.69	0.0201641
		175.094	1.105			1.16445e+08	9.49378e+07	4.03624e+07	1.03597e+08	9.60356e+07	1.5114e+08	1.94925e+08	1.9958e+08	1.54753e+08	9.86581e+07	1.611	0.69	0.0337396
		85.0897	1.725			8.89086e+07	8.0544e+07	1.04141e+08	5.40311e+07	3.28402e+07	1.25512e+08	1.66016e+08	9.30773e+07	2.08221e+08	1.29614e+08	1.609	0.69	0.0214169
4-Oxoproline	C5 H7 N O3	129.041	2.127	99.4		2.35219e+09	2.23991e+09	1.91117e+09	1.55916e+09	1.31852e+09	3.0732e+09	3.22139e+09	2.41719e+09	3.4726e+09	2.73189e+09	1.608	0.69	0.00798991
	C4 H15 N6 O7 P3	352.021	1.775			9.60426e+06	1.06459e+07	1.35263e+07	7.72723e+06	5.50866e+06	1.54207e+07	1.61941e+07	1.49929e+07	1.54975e+07	1.43425e+07	1.606	0.68	0.0246014
	C11 H22 N2 O5	262.153	4.182			1.94151e+07	1.84283e+07	1.74939e+07	1.71188e+07	1.49611e+07	2.78952e+07	2.95925e+07	2.33089e+07	2.89216e+07	2.72407e+07	1.595	0.67	7.66821e-05
5-Aminovaleric acid	C5 H11 N O2	117.077	1.262	93.1		2.54248e+08	2.05585e+08	2.22124e+08	1.2567e+08	7.46282e+07	3.27276e+08	3.63022e+08	2.74183e+08	4.64413e+08	3.17541e+08	1.592	0.67	0.0250711
1-acetyl-2-isobutyrylpyrazolidine-4-carboxylic acid	C10 H16 N2 O4	228.111	4.39			2.49529e+07	1.70116e+07	1.2853e+07	2.00431e+07	8.78452e+06	2.98917e+07	3.3497e+07	1.99307e+07	2.70432e+07	2.41525e+07	1.59	0.67	0.0428732
6-Hydroxycaproic acid	C6 H12 O3	132.077	6.237	95.2		6.43504e+08	6.8105e+08	8.72442e+08	5.78814e+08	4.68255e+08	8.62085e+08	1.02235e+09	1.34509e+09	1.4133e+09	8.68074e+08	1.589	0.67	0.00693899
DHEBA	C8 H12 N2 O4	200.079	3.25			6.29936e+07	4.56251e+07	3.96723e+07	2.0171e+07	2.0838e+07	6.17355e+07	5.13604e+07	7.2912e+07	8.18805e+07	6.28099e+07	1.583	0.66	0.0426734
4-Hydroxymethylquinoline	C10 H9 N O	159.069	5.793			7.21038e+06	6.03921e+06	6.51953e+06	4.99185e+06	4.57214e+06	7.00722e+06	1.16582e+07	9.30114e+06	1.14478e+07	9.51907e+06	1.576	0.66	0.00354778
gamma-L-glutamyl-L-leucine	C11 H20 N2 O5	260.137	5.282			7.60873e+06	5.40305e+06	2.49653e+06	5.32333e+06	3.2528e+06	8.15036e+06	8.76705e+06	7.2148e+06	1.23942e+07	8.37264e+06	1.573	0.65	0.0226411
2,4,6-trinitrobenzene-1,3,5-triamine	C6 H6 N6 O6	258.035	2.814			1.97904e+07	2.31049e+07	3.22708e+07	1.6107e+07	1.36736e+07	3.52366e+07	3.11309e+07	2.29574e+07	3.49889e+07	3.10969e+07	1.573	0.65	0.0436396
octadec-9-ynoic acid	C18 H32 O2	297.267	23.611	64.6		8.12056e+07	4.28834e+07	1.04784e+08	8.34238e+07	8.58769e+07	1.90851e+08	1.31249e+08	1.15233e+08	1.79903e+08	7.84732e+07	1.573	0.65	0.0380709
Pseudouridine	C9 H12 N2 O6	244.069	1.72	70.9	C02067	8.30004e+07	6.6542e+07	4.9371e+07	5.5265e+07	5.50154e+07	9.68196e+07	9.32709e+07	8.09687e+07	8.6799e+07	7.75149e+07	1.571	0.65	0.0137171
Elaiomycin F	C13 H28 N2 O3	260.21	1.268			1.53948e+08	1.42484e+08	1.59953e+08	7.05161e+07	5.55694e+07	2.93278e+08	2.23784e+08	2.16703e+08	2.33467e+08	1.53748e+08	1.571	0.65	0.0270711
		191.078	1.131			1.54921e+07	1.25133e+07	9.98237e+06	1.43223e+07	1.49493e+07	1.93407e+07	2.59283e+07	2.56982e+07	2.24529e+07	2.01499e+07	1.568	0.65	0.000956914
1-acetyl-2-isobutyrylpyrazolidine-4-carboxylic acid	C10 H16 N2 O4	228.111	4.572			5.0737e+07	3.65504e+07	2.65099e+07	4.32497e+07	1.8183e+07	6.65493e+07	6.92416e+07	4.57424e+07	5.7279e+07	4.87649e+07	1.567	0.65	0.0379229
	C28 H23 N O S	421.148	4.908			3.5319e+06	2.84515e+06	2.41734e+06	1.87634e+06	859111	3.70114e+06	5.27054e+06	3.785e+06	5.16832e+06	2.96734e+06	1.566	0.65	0.0488843
		109.026	2.386			1.23125e+08	1.17776e+08	1.41839e+08	8.18181e+07	7.58388e+07	1.83112e+08	1.89275e+08	1.01675e+08	1.87943e+08	1.49701e+08	1.555	0.64	0.0425132
Streptodiketopiperazine A	C13 H14 N2 O2	230.105	4.793			2.51138e+06	2.05281e+06	2.58364e+06	2.49532e+06	1.74199e+06	5.17351e+06	4.76264e+06	3.85879e+06	3.61582e+06	3.35175e+06	1.546	0.63	0.000723022
	C9 H10 N10 O5	338.085	1.215			1.86473e+07	1.89351e+07	1.5308e+07	2.73586e+07	2.64867e+07	2.83522e+07	3.71273e+07	3.67417e+07	2.90869e+07	2.89083e+07	1.536	0.62	0.0150091
		86.0718	6.237			3.05632e+07	3.12932e+07	4.17492e+07	2.64908e+07	2.05873e+07	4.05405e+07	4.66486e+07	6.21458e+07	6.74568e+07	3.92252e+07	1.526	0.61	0.0104519
	C15 H28 Cl N P2	319.138	1.227			5.45712e+06	4.84957e+06	2.83621e+06	3.93728e+06	2.04995e+06	6.00333e+06	6.89315e+06	4.3656e+06	7.95903e+06	5.54208e+06	1.525	0.61	0.0445509
	C11 H21 N O7	279.132	1.236			5.35179e+07	3.73945e+07	5.25534e+07	6.40627e+07	5.5509e+07	4.88959e+07	8.62839e+07	8.19171e+07	8.13122e+07	7.8088e+07	1.519	0.6	0.0330338
		117.077	1.719			7.70085e+07	8.56276e+07	8.65474e+07	6.09579e+07	4.4146e+07	1.04086e+08	1.26467e+08	1.16917e+08	1.60193e+08	1.06773e+08	1.518	0.6	0.00739534
	C4 H11 N10 O2 P	262.08	1.19			6.80612e+06	3.3427e+06	2.53364e+06	4.26999e+06	4.04776e+06	6.03489e+06	8.36496e+06	6.14444e+06	8.87988e+06	6.08009e+06	1.518	0.6	0.0215377
16-methyl-6Z,9Z-heptadecadienoic acid	C18 H32 O2	280.24	23.556			4.34979e+07	3.28982e+07	5.24807e+07	3.76505e+07	3.47991e+07	5.70847e+07	5.26381e+07	6.07618e+07	5.53938e+07	7.6962e+07	1.516	0.6	0.00533303
	C9 H16 N2 O8	280.092	4.637			1.64661e+07	1.73165e+07	1.6629e+07	9.66425e+06	7.14186e+06	2.73962e+07	2.48589e+07	1.97054e+07	2.82184e+07	2.34644e+07	1.51	0.59	0.0178216
(2R)-2-Hydroxy-3-(pentyloxy)propyl 2-(trimethylammonio)ethyl phosphate	C13 H30 N O6 P	327.179	5.988			9.63434e+06	7.55558e+06	5.65655e+06	7.04843e+06	5.74241e+06	1.05918e+07	1.43761e+07	8.89745e+06	1.38314e+07	8.94126e+06	1.503	0.59	0.011903
		115.062	1.162			9.85014e+07	8.09985e+07	8.00924e+07	4.93241e+07	3.17697e+07	1.09366e+08	1.20341e+08	9.02188e+07	1.45303e+08	1.22168e+08	1.503	0.59	0.0385319
	C2 H7 N7 P2	191.024	1.244			2.41584e+07	1.29524e+07	1.6449e+07	2.77748e+07	2.98868e+07	2.49343e+07	4.01209e+07	4.3898e+07	3.58063e+07	3.61975e+07	1.498	0.58	0.0297358
14-hydroxy-12-tetradecenoic acid	C14 H26 O3	242.188	23.825			1.35294e+07	1.46834e+07	2.21659e+07	8.25441e+06	6.79124e+06	1.83884e+07	2.4703e+07	2.02557e+07	3.27303e+07	1.73887e+07	1.497	0.58	0.043236
		189.099	1.725			6.98793e+06	7.49042e+06	5.99936e+06	7.4855e+06	5.46395e+06	7.83946e+06	1.04641e+07	1.27344e+07	1.14097e+07	9.03338e+06	1.497	0.58	0.00468739
octadec-9-ynoic acid	C18 H32 O2	262.23	23.554	96.8		1.18084e+08	9.08207e+07	1.34236e+08	9.15823e+07	9.06324e+07	1.33651e+08	1.28178e+08	1.5019e+08	1.36934e+08	1.99841e+08	1.495	0.58	0.0147161
Pukeleimide A	C13 H14 N2 O5	278.09	4.072			6.88672e+06	6.81273e+06	5.37622e+06	1.26408e+07	7.33534e+06	1.5233e+07	1.29662e+07	1.02527e+07	8.80081e+06	1.00611e+07	1.489	0.57	0.0493553
7-Methylguanine	C6 H7 N5 O	165.065	1.96	69.7	C02242	8.50976e+07	8.54792e+07	7.10949e+07	7.13465e+07	6.90386e+07	1.07386e+08	1.05909e+08	9.13817e+07	1.1648e+08	1.03057e+08	1.484	0.57	0.00092613
Ambrettolic acid	C16 H30 O3	270.219	20.835			4.91643e+07	5.77398e+07	9.51389e+07	5.16795e+07	5.96441e+07	6.30927e+07	8.16991e+07	8.53209e+07	1.06985e+08	1.14948e+08	1.478	0.56	0.0460143
Alepric acid	C14 H24 O2	224.178	24.244			1.66352e+07	1.68181e+07	2.044e+07	1.24778e+07	1.27839e+07	2.36589e+07	2.67006e+07	2.45628e+07	3.47108e+07	2.15932e+07	1.477	0.56	0.00340593
3beta-Acetoxy-4-oplopanone	C17 H28 O4	296.199	13.898			6.35366e+06	1.45289e+07	1.44713e+07	1.42867e+07	1.7234e+07	1.97604e+07	2.12958e+07	4.35298e+07	1.32452e+07	3.15332e+07	1.472	0.56	0.0486261
Aleurodisconitrile	C13 H16 N2 O6	296.101	4.081			2.81059e+07	2.41721e+07	1.9431e+07	4.51902e+07	2.63022e+07	5.67358e+07	5.10261e+07	3.57878e+07	3.45262e+07	3.86281e+07	1.469	0.55	0.0373444
N-(4-phenyl-3-oxo-tetranoyl)-homoserine lactone	C14 H15 N O4	261.1	4.395			5.72989e+06	8.28953e+06	6.04033e+06	7.39637e+06	4.49265e+06	8.38469e+06	8.84662e+06	1.27258e+07	9.86762e+06	6.44202e+06	1.465	0.55	0.0434606
3,14-dihydro-15-keto-tetranor Prostaglandin E2		94.0423	4.202			1.71788e+08	1.35988e+08	1.6176e+08	1.21855e+08	8.61582e+07	2.05778e+08	1.84842e+08	1.59412e+08	2.31484e+08	1.99215e+08	1.465	0.55	0.0297754
	C17 H18 N6 S	338.13	7.411			1.69761e+07	1.51026e+07	1.56264e+07	1.11251e+07	5.53069e+06	2.19982e+07	2.72434e+07	1.68711e+07	2.89097e+07	1.74914e+07	1.457	0.54	0.0401937
1-Fluorosilinane	C5 H11 F Si	118.062	4.989			8.42081e+07	8.95052e+07	9.26238e+07	5.65194e+07	4.61792e+07	1.06187e+08	1.47197e+08	1.22042e+08	1.62726e+08	1.0981e+08	1.449	0.54	0.00983208
Dimethyl (hydroxyimino)malonate	C5 H7 N O5	161.033	4.635			4.55478e+06	5.0015e+06	5.26256e+06	2.62453e+06	1.95814e+06	9.32342e+06	6.59274e+06	5.63179e+06	7.5393e+06	5.26305e+06	1.447	0.53	0.0314034
		90.0475	4.201			5.26931e+08	4.28863e+08	5.22288e+08	3.39718e+08	2.25971e+08	6.21212e+08	6.16184e+08	5.38222e+08	7.34392e+08	6.20181e+08	1.446	0.53	0.0392237
Fumarycarnitine	C11 H17 N O6	259.105	1.204			1.13006e+07	9.61178e+06	8.52945e+06	1.25767e+07	1.39034e+07	1.15362e+07	1.66164e+07	1.52394e+07	1.62676e+07	2.15096e+07	1.44	0.53	0.0247938
	C23 H43 N4 O3 P	454.308	7.042			2.23746e+07	1.75324e+07	1.50205e+07	2.19519e+07	1.54652e+07	2.348e+07	2.30966e+07	2.52508e+07	2.63543e+07	2.72916e+07	1.44	0.53	0.0160161
Indole	C8 H7 N	117.058	4.2			5.65553e+08	4.52607e+08	5.41466e+08	4.01029e+08	2.5234e+08	6.89986e+08	6.49638e+08	5.31654e+08	7.42455e+08	6.28747e+08	1.435	0.52	0.0430012
		184.12	4.926			1.81937e+07	1.9089e+07	2.4331e+07	1.22225e+07	8.68081e+06	2.61128e+07	2.86107e+07	2.41409e+07	2.75977e+07	2.41882e+07	1.435	0.52	0.0451827
Maniwamycin A	C10 H18 N2 O2	198.136	5.89			7.30003e+06	6.45147e+06	6.71698e+06	3.56e+06	2.30415e+06	8.17105e+06	1.04259e+07	7.52289e+06	1.02544e+07	9.24511e+06	1.433	0.52	0.0458247
	C11 H27 Cl N8 O S	354.17	23.558			1.44321e+07	1.22864e+07	1.74679e+07	1.12643e+07	1.06939e+07	1.74872e+07	1.63843e+07	1.93888e+07	1.61511e+07	2.69348e+07	1.423	0.51	0.0206598
Epi-Leucinopine	C11 H19 N O6	261.121	2.176			3.81615e+07	4.80631e+07	4.42546e+07	4.72318e+07	4.82141e+07	6.68624e+07	6.96519e+07	7.796e+07	6.31675e+07	4.42448e+07	1.416	0.5	0.0197041
4-Bromo-3,5-dihydroxybenzoic acid	C7 H5 Br O4	231.937	8.097			1.73836e+07	1.95389e+07	2.15849e+07	1.88357e+07	2.00328e+07	2.51749e+07	3.41347e+07	2.75605e+07	2.72716e+07	2.85194e+07	1.411	0.5	0.000424289
	C20 H39 N2 O P S2	418.225	5.368			1.45045e+06	1.97709e+06	2.49663e+06	2.05225e+06	1.50662e+06	3.20302e+06	2.48016e+06	2.76568e+06	3.65133e+06	2.62061e+06	1.399	0.48	0.00802635
Benzaldehyde	C7 H6 O	106.042	4.202			1.09927e+08	8.97903e+07	1.02128e+08	7.81477e+07	5.47691e+07	1.2031e+08	1.36325e+08	1.09788e+08	1.54471e+08	1.2513e+08	1.394	0.48	0.0234988
	C31 H40 N4 O2	500.314	7.042			1.5886e+07	1.33362e+07	1.04463e+07	1.64294e+07	1.11214e+07	1.76153e+07	1.7626e+07	1.8517e+07	1.85971e+07	1.95972e+07	1.388	0.47	0.0209803
10(R)-hydroxy-8Z-octadeceneic acid	C18 H34 O3	298.251	23.55			5.81006e+08	4.46959e+08	6.49289e+08	4.95735e+08	5.12565e+08	7.10475e+08	6.61214e+08	8.06141e+08	7.05145e+08	1.06714e+09	1.386	0.47	0.00856101
3-Methyl-4-vinylpyridine	C8 H9 N	119.074	4.2			2.02967e+10	1.67555e+10	1.79702e+10	1.2658e+10	8.63094e+09	2.31977e+10	2.33458e+10	1.92091e+10	2.74508e+10	2.28369e+10	1.384	0.47	0.0375222
acetoacetamide	C4 H7 N O2	101.048	1.773			1.73578e+08	1.57895e+08	1.73226e+08	1.24422e+08	8.86012e+07	1.56883e+08	2.17209e+08	1.91538e+08	2.50605e+08	2.1821e+08	1.376	0.46	0.0397663
	C5 H13 N4 O4 P	224.068	7.042			5.17737e+06	4.10537e+06	3.62497e+06	5.05346e+06	3.04802e+06	5.29142e+06	5.68948e+06	5.09643e+06	5.61252e+06	6.03705e+06	1.367	0.45	0.0396275
		148.036	4.209			2.38347e+07	2.27901e+07	2.31266e+07	1.87282e+07	1.68544e+07	3.21075e+07	3.50355e+07	2.25025e+07	3.10759e+07	2.53316e+07	1.364	0.45	0.0168334
NP-020283	C29 H46 O6	472.319	7.042	74.8		2.11162e+07	1.80067e+07	1.41527e+07	2.08408e+07	1.42496e+07	2.28944e+07	2.30119e+07	2.45009e+07	2.47275e+07	2.50633e+07	1.361	0.44	0.0197273
NP-016455	C11 H18 N2 O4	242.126	5.89	96.6		2.32967e+08	1.86142e+08	1.93505e+08	1.20412e+08	7.8946e+07	2.52382e+08	3.09579e+08	2.28333e+08	3.0357e+08	2.46503e+08	1.356	0.44	0.0424044
bolmantalate	C29 H40 O3	436.297	7.042			1.10094e+07	8.85444e+06	6.64946e+06	1.06591e+07	6.85999e+06	1.18458e+07	1.15299e+07	1.1977e+07	1.2104e+07	1.26701e+07	1.353	0.44	0.033977
NP-012972	C14 H24 O3	222.162	20.987	81.4		1.01896e+07	1.612e+07	1.62323e+07	1.13681e+07	1.39893e+07	1.62332e+07	2.18304e+07	1.87808e+07	2.15066e+07	1.52493e+07	1.343	0.42	0.0256864
Trans-Non-2-en-(4.6.8)-triyn-1-ol	C9 H6 O	130.042	4.196			2.58542e+08	2.28682e+08	2.44075e+08	1.71967e+08	1.24216e+08	3.01953e+08	3.0688e+08	2.59007e+08	3.70712e+08	3.16666e+08	1.342	0.42	0.0279439
		68.0633	2.37			4.27294e+08	3.55605e+08	3.67979e+08	2.74426e+08	1.98672e+08	4.77338e+08	5.00262e+08	4.09138e+08	5.32644e+08	4.68734e+08	1.342	0.42	0.0337773
Phenylmethylsulfonyl fluoride	C7 H7 F O2 S	174.015	2.608			9.97208e+07	8.13992e+07	5.40141e+07	8.48032e+07	5.50834e+07	9.09823e+07	1.41632e+08	1.18618e+08	1.08752e+08	9.84203e+07	1.336	0.42	0.025134
	C20 H44 N2 O P2	390.292	7.042			6.39709e+06	5.33813e+06	4.14529e+06	6.42808e+06	3.8383e+06	7.117e+06	6.80499e+06	6.893e+06	7.33619e+06	7.50067e+06	1.333	0.41	0.0354116
28:7(n-6)	C28 H42 O2	410.318	7.042			4.78006e+06	4.16884e+06	3.05206e+06	4.52316e+06	3.01983e+06	5.54667e+06	4.9748e+06	5.0678e+06	5.73081e+06	5.89329e+06	1.331	0.41	0.0206624
Sistopyrone	C9 H8 O2	148.052	4.198			2.36109e+08	2.04076e+08	2.15251e+08	1.57854e+08	1.0579e+08	2.63024e+08	2.80697e+08	2.29356e+08	3.30831e+08	2.70972e+08	1.328	0.41	0.0367647
Citric acid	C6 H8 O7	192.026	1.228	72.8		2.64533e+07	1.353e+07	1.64496e+07	2.71914e+07	2.76389e+07	2.79957e+07	4.28885e+07	4.48484e+07	3.50744e+07	3.41007e+07	1.326	0.41	0.0193025
Pipecolinic acid	C6 H11 N O2	129.079	1.195	79.7		3.61879e+08	2.77049e+08	2.2539e+08	2.8607e+08	2.54492e+08	3.41251e+08	4.42588e+08	4.54321e+08	3.65741e+08	2.88938e+08	1.32	0.4	0.0326087
L-Norleucine	C6 H13 N O2	131.095	2.595	94.6	C01933	2.61353e+10	2.19881e+10	2.24858e+10	1.60206e+10	1.12717e+10	2.92959e+10	3.10536e+10	2.4828e+10	2.87715e+10	2.8994e+10	1.319	0.4	0.048087
	C22 H41 N4 O P	408.303	7.042			6.55687e+06	5.81027e+06	5.02863e+06	7.25325e+06	4.92522e+06	7.3993e+06	7.36812e+06	7.66327e+06	8.72097e+06	8.81358e+06	1.319	0.4	0.0104002
	C10 H18 N7 O3 P	315.122	6.438			3.52459e+07	3.25466e+07	3.27459e+07	1.99616e+07	1.68326e+07	4.2805e+07	5.03557e+07	3.39162e+07	5.3832e+07	4.27638e+07	1.315	0.4	0.0225099
4-methoxyacetanilide	C9 H11 N O2	165.079	4.197			1.11706e+10	9.94397e+09	1.00711e+10	7.39835e+09	5.15194e+09	1.26804e+10	1.32123e+10	1.08614e+10	1.60186e+10	1.30163e+10	1.309	0.39	0.0326978
3-oxo-5S-amino-hexanoic acid	C6 H11 N O3	145.074	1.124			6.50297e+07	6.79896e+07	3.70401e+07	5.51879e+07	3.93521e+07	7.00015e+07	9.63106e+07	7.22296e+07	7.95064e+07	6.54487e+07	1.309	0.39	0.032639
Citraconic acid	C5 H6 O4	130.025	1.841	88		2.35033e+09	2.37655e+09	2.49373e+09	2.01782e+09	1.773e+09	3.07707e+09	3.06306e+09	2.18699e+09	3.73585e+09	2.51793e+09	1.303	0.38	0.0448139
	C5 H16 N9 P	233.126	4.164			4.16002e+06	8.94874e+06	1.1195e+07	8.3079e+06	7.16876e+06	1.74271e+07	1.07864e+07	1.03813e+07	1.69036e+07	9.54577e+06	1.298	0.38	0.0436778
Thiolane-2-carboxylic acid	C5 H8 O2 S	132.025	1.771			1.62253e+09	1.44804e+09	1.55742e+09	9.83705e+08	6.38918e+08	1.87292e+09	2.06915e+09	1.72764e+09	2.36578e+09	1.79874e+09	1.293	0.37	0.0444634
Ergosta-4,6,8(14),22E-tetraen-3-one	C28 H40 O	392.308	7.043			5.50738e+06	4.26812e+06	3.27985e+06	4.79479e+06	3.13453e+06	5.45815e+06	5.42605e+06	5.49889e+06	5.85819e+06	6.27515e+06	1.288	0.37	0.0366489
CAPRIC DIETHANOLAMIDE	C14 H29 N O3	259.215	7.697			3.8998e+06	4.64107e+06	2.4533e+06	3.93574e+06	4.23132e+06	4.44267e+06	5.3599e+06	4.6782e+06	7.57078e+06	5.06976e+06	1.288	0.37	0.0424692
L-Methionine	C5 H11 N O2 S	149.051	1.771	99.1	C00073	3.44276e+09	3.11073e+09	3.33721e+09	2.12468e+09	1.41774e+09	3.98861e+09	4.41447e+09	3.67846e+09	5.01269e+09	3.8621e+09	1.282	0.36	0.0421634
		69.0586	1.16			2.21282e+09	1.97349e+09	2.04071e+09	1.84537e+09	1.45261e+09	2.48357e+09	2.64028e+09	2.3809e+09	2.58034e+09	2.51826e+09	1.276	0.35	0.0138009
Thiomorpholine	C4 H9 N S	103.046	1.773			8.17308e+08	7.40665e+08	7.84583e+08	5.0222e+08	3.30447e+08	9.38478e+08	1.04966e+09	8.80585e+08	1.20489e+09	9.28462e+08	1.267	0.34	0.0413718
Valine	C5 H11 N O2	117.079	1.252	85.5	C16436	4.96525e+09	4.51781e+09	4.02801e+09	3.39761e+09	2.57275e+09	7.62598e+09	5.09951e+09	4.72704e+09	5.63854e+09	4.92146e+09	1.266	0.34	0.0348202
D-Proline	C5 H9 N O2	115.064	1.16	99.7	C00763	6.16305e+09	5.51308e+09	5.66657e+09	5.06313e+09	4.06949e+09	6.87426e+09	7.34308e+09	6.5371e+09	7.03009e+09	6.92733e+09	1.257	0.33	0.0146856
4-(2-hydroxyethyl)-5-methyloxazole	C6 H9 N O2	127.064	1.203			5.7013e+07	5.01379e+07	5.34896e+07	5.88866e+07	4.08451e+07	5.65963e+07	6.64361e+07	6.80442e+07	6.9596e+07	6.56846e+07	1.242	0.31	0.0195691
Succinic semialdehyde	C4 H6 O3	102.03	1.839	69.5		1.93267e+08	1.91482e+08	2.00725e+08	1.61842e+08	1.379e+08	2.29701e+08	2.63281e+08	1.88952e+08	2.55161e+08	2.03395e+08	1.2	0.26	0.0282199
Octahydro-1,2,8-indolizinetriol	C8 H15 N O3	173.105	1.15			7.52513e+07	6.1195e+07	6.17131e+07	6.26005e+07	5.40127e+07	5.56674e+07	5.44325e+07	5.44125e+07	5.6796e+07	4.52966e+07	0.882	-0.18	0.0422876
Agrocybyne B	C8 H11 N O	137.084	6.269			9.45389e+06	1.15212e+07	1.25599e+07	9.69832e+06	1.00987e+07	8.85702e+06	9.28498e+06	7.32818e+06	9.48314e+06	6.6191e+06	0.877	-0.19	0.023772
DIETHYL ACETYL ASPARTATE	C10 H17 N O5	231.11	4.947			5.04524e+06	4.49697e+06	4.46098e+06	6.48915e+06	5.21478e+06	3.76917e+06	4.37839e+06	4.70818e+06	3.61767e+06	4.47114e+06	0.868	-0.2	0.0485291
Nicotinic acid	C6 H5 N O2	123.032	1.734	99.9	C00253	1.47103e+09	1.59489e+09	1.39576e+09	1.71043e+09	1.62346e+09	1.38211e+09	1.42813e+09	1.26168e+09	1.47479e+09	1.09508e+09	0.867	-0.21	0.0397234
	C19 H30 N6 O6	438.221	4.461			2.80471e+07	4.01995e+07	3.89922e+07	3.04333e+07	2.95651e+07	3.07603e+07	2.63917e+07	2.28401e+07	2.83291e+07	2.3873e+07	0.867	-0.21	0.0405912
(2Z)-5-(1,2,4a,5-tetramethyl-7-oxo-1,2,3,4,4a,7,8,8a-octahydronaphthalen-1-yl)-3-methylpent-2-enoic acid	C20 H30 O3	340.199	24.166	97.1		4.23035e+07	4.93931e+07	5.08462e+07	5.39786e+07	5.61559e+07	4.24852e+07	4.30792e+07	4.79155e+07	3.484e+07	4.3064e+07	0.847	-0.24	0.0361101
trimethylsilylmethyllithium	C4 H11 Li Si	94.0788	14.063			4.29377e+07	4.25582e+07	4.45372e+07	5.05551e+07	5.1736e+07	3.63426e+07	4.37604e+07	4.0939e+07	3.71204e+07	3.5324e+07	0.833	-0.26	0.0132689
		80.0632	24.14			3.48044e+07	3.49385e+07	4.01071e+07	4.35893e+07	4.42981e+07	3.31832e+07	3.10494e+07	3.79267e+07	2.83417e+07	3.3191e+07	0.827	-0.27	0.0287029
Nitrobenzene	C6 H5 N O2	123.031	1.474	83.8		6.93773e+06	7.11996e+06	6.11136e+06	8.80638e+06	1.07278e+07	6.83001e+06	4.98106e+06	5.75423e+06	4.28366e+06	6.08456e+06	0.808	-0.31	0.0288356
3,10-dihydroxydecanoic acid	C10 H20 O4	204.135	7.465			1.37332e+07	8.38925e+06	9.60443e+06	8.65824e+06	8.2333e+06	7.33904e+06	4.49372e+06	6.96789e+06	7.03129e+06	5.56355e+06	0.805	-0.31	0.0114147
Cladosporester C	C14 H24 O6	288.157	6.863			2.15379e+07	1.70876e+07	1.48338e+07	1.35299e+07	1.12831e+07	1.19421e+07	1.0158e+07	1.18329e+07	1.21428e+07	8.86551e+06	0.798	-0.33	0.0341682
	C9 H18 N8 O3 P2 S	380.072	1.13			1.72509e+08	1.45453e+08	1.88427e+08	2.04719e+08	2.68782e+08	1.50064e+08	1.23748e+08	1.64896e+08	8.73437e+07	1.54422e+08	0.796	-0.33	0.0437889
(6RS,10RS)-6,10-dimethylbicyclo[4.4.0]dec-1-en-3-one	C12 H18 O	178.136	14.059			3.09961e+07	3.07375e+07	2.98315e+07	3.57273e+07	3.83764e+07	2.46374e+07	2.75587e+07	2.83163e+07	2.20871e+07	2.20509e+07	0.795	-0.33	0.00427853
Aleprylic acid	C12 H20 O2	196.146	16.371			2.461e+07	1.95096e+07	1.86675e+07	2.13134e+07	2.09475e+07	1.42392e+07	1.86113e+07	1.86024e+07	1.46185e+07	1.65252e+07	0.789	-0.34	0.0118589
N-lauroyl glycine	C14 H27 N O3	257.199	5.702			1.57373e+07	1.44268e+07	1.27002e+07	1.65871e+07	1.59587e+07	1.37119e+07	1.23355e+07	1.21346e+07	1.32115e+07	1.06453e+07	0.784	-0.35	0.0169023
	C10 H24 N9 O5 P	381.163	4.413			1.05953e+07	1.33177e+07	1.36702e+07	1.11444e+07	1.09777e+07	8.70156e+06	9.71819e+06	9.29144e+06	8.19314e+06	7.15064e+06	0.781	-0.36	0.00248474
16-methyl-6Z,9Z,12Z-heptadecatrienoic acid	C18 H30 O2	278.224	23.586			6.0858e+07	3.93593e+07	3.47938e+07	4.83174e+07	3.93593e+07	2.93823e+07	3.11421e+07	2.93234e+07	3.93445e+07	3.06811e+07	0.78	-0.36	0.0289711
L-5-Hydroxytryptophan	C11 H12 N2 O3	220.085	3.968	66.8	C01017	1.5658e+07	1.39933e+07	1.06457e+07	1.62579e+07	1.31911e+07	9.64054e+06	1.12648e+07	8.90108e+06	1.17671e+07	1.08304e+07	0.774	-0.37	0.0175224
Catechol	C6 H6 O2	110.035	6.129	77.6		1.7349e+07	2.10537e+07	1.61855e+07	1.48013e+07	1.5233e+07	1.67623e+07	1.26537e+07	1.21179e+07	1.25106e+07	1.00133e+07	0.773	-0.37	0.0270692
	C7 H17 N10 P	272.137	4.384			3.60359e+06	5.43342e+06	3.55006e+06	5.41775e+06	3.29694e+06	2.22434e+06	2.93096e+06	2.92596e+06	2.63867e+06	2.78213e+06	0.772	-0.37	0.0125077
	C9 H18 N3 O2 P S2	295.058	1.328			1.01121e+08	1.15872e+08	7.41228e+07	7.78773e+07	7.8179e+07	6.02609e+07	6.02925e+07	7.14946e+07	6.91623e+07	4.97973e+07	0.771	-0.37	0.0127157
NP-021797	C12 H22 O3	196.146	14.055	81.4		4.67814e+07	4.83674e+07	4.55965e+07	5.50501e+07	5.7679e+07	3.71126e+07	4.15743e+07	4.34349e+07	3.25394e+07	3.46348e+07	0.767	-0.38	0.00356083
Curvulalide	C10 H14 O5	214.083	5.128			5.8638e+06	4.78715e+06	4.66548e+06	5.25591e+06	4.14233e+06	3.66946e+06	2.81969e+06	4.95689e+06	3.094e+06	3.89041e+06	0.767	-0.38	0.0333536
adrenaline	C9 H13 N O3	183.09	4.462			1.8788e+07	2.50407e+07	2.55949e+07	2.53904e+07	2.52587e+07	1.97016e+07	1.92093e+07	1.68724e+07	2.32341e+07	1.84607e+07	0.761	-0.39	0.0316334
4-Hydroxyphenylacetic acid	C8 H8 O3	152.046	4.764	67.7		3.9059e+06	4.68954e+06	4.37929e+06	5.94314e+06	5.91912e+06	3.471e+06	3.5623e+06	3.58801e+06	3.14192e+06	3.65023e+06	0.76	-0.4	0.0121177
trimethylsilylmethyllithium	C4 H11 Li Si	94.0788	24.148			5.82525e+07	5.24894e+07	6.01898e+07	6.07402e+07	6.62275e+07	5.2694e+07	4.56882e+07	3.1507e+07	4.36295e+07	5.19953e+07	0.759	-0.4	0.031417
N-(3-hydroxy-pentanoyl)-homoserine lactone	C9 H15 N O4	201.1	4.463			3.63381e+07	4.73696e+07	4.82947e+07	4.55588e+07	4.85435e+07	3.6915e+07	3.54521e+07	3.0701e+07	4.13629e+07	3.26028e+07	0.748	-0.42	0.0115234
Uric acid	C5 H4 N4 O3	168.027	1.844	85.1		1.2011e+08	9.47442e+07	8.03921e+07	1.23932e+08	1.11024e+08	7.07337e+07	8.75073e+07	8.33946e+07	6.76938e+07	8.2735e+07	0.745	-0.42	0.0185478
	C25 H35 N6 O5 P3	592.186	3.757			1.32794e+07	1.16998e+07	1.22365e+07	1.76718e+07	2.30551e+07	1.04575e+07	1.00056e+07	9.83416e+06	8.84667e+06	7.41719e+06	0.741	-0.43	0.0149958
Acrylic acid	C3 H4 O2	72.0198	7.074	99.3		9.67675e+06	8.49911e+06	7.9968e+06	8.79496e+06	6.25764e+06	6.08014e+06	5.83014e+06	7.16941e+06	6.47119e+06	6.28804e+06	0.74	-0.43	0.0227325
Tricarbethoxymethane	C10 H16 O6	232.094	5.167			1.17968e+07	1.19674e+07	1.05868e+07	9.57789e+06	8.74403e+06	7.71919e+06	9.19581e+06	7.75637e+06	8.50632e+06	6.29749e+06	0.733	-0.45	0.0108208
9,10-dihydroxy-12Z-octadecenoic acid	C18 H34 O4	314.246	18.395	99.4		1.75195e+08	1.3981e+08	1.30704e+08	9.99374e+07	1.07232e+08	1.01099e+08	9.04466e+07	9.918e+07	9.21517e+07	9.24038e+07	0.707	-0.5	0.038722
N3,N4-Dimethyl-L-arginine	C8 H18 N4 O2	202.143	1.141	90.5		1.38962e+08	1.22587e+08	1.02704e+08	1.19145e+08	1.07573e+08	8.4577e+07	8.41245e+07	7.00783e+07	9.10419e+07	7.60376e+07	0.706	-0.5	0.000736231
NP-014287	C18 H32 O3	278.224	24.795	77.2		3.67184e+07	4.52864e+07	4.64514e+07	4.40977e+07	4.04975e+07	3.1077e+07	2.91701e+07	3.2031e+07	2.51489e+07	3.31917e+07	0.705	-0.5	0.000726414
NP-021797	C12 H22 O3	236.139	14.062	61		1.67313e+07	2.02256e+07	1.7977e+07	2.31097e+07	2.20556e+07	1.42207e+07	1.5446e+07	1.67164e+07	1.12949e+07	1.2569e+07	0.703	-0.51	0.00514846
4-Vinylresorcinol	C8 H8 O2	136.053	5.059			3.47886e+07	2.66816e+07	3.17719e+07	2.90554e+07	2.36648e+07	2.01889e+07	1.74018e+07	2.15024e+07	2.15254e+07	1.93286e+07	0.695	-0.53	0.00244184
	C24 H20 N4 O7 S	508.104	4.918			1.22428e+07	1.53978e+07	1.83703e+07	1.79375e+07	1.87961e+07	1.42161e+07	1.24634e+07	1.39707e+07	1.16988e+07	1.21512e+07	0.695	-0.53	0.037435
	C12 H30 N5 O2 P	307.214	7.497			3.53125e+06	2.07706e+06	3.61396e+06	2.38372e+06	2.4501e+06	1.7278e+06	1.38032e+06	1.41768e+06	1.69527e+06	1.83976e+06	0.692	-0.53	0.00528005
N-{[(2-Methyl-2-propanyl)oxy]carbonyl}-D-methionylglycine	C12 H22 N2 O5 S	306.125	3.743			1.69028e+08	1.53373e+08	1.22515e+08	1.99633e+08	2.05069e+08	1.31295e+08	1.14859e+08	1.16274e+08	1.47335e+08	6.58034e+07	0.688	-0.54	0.0454663
N-Acetyldopamine	C10 H13 N O3	195.09	5.059	97.3		4.61469e+07	3.68282e+07	4.10401e+07	4.01722e+07	3.28644e+07	2.32268e+07	2.45813e+07	2.98786e+07	2.76439e+07	2.77748e+07	0.688	-0.54	0.000784325
NP-001596	C16 H30 O4	268.204	22.101	71.8		9.47394e+07	1.03137e+08	1.24184e+08	1.41266e+08	1.65553e+08	8.4591e+07	8.86564e+07	1.1124e+08	6.0694e+07	7.50571e+07	0.681	-0.55	0.0223056
trimethylsilylmethyllithium	C4 H11 Li Si	94.0788	18.337			3.89552e+07	4.02238e+07	4.02181e+07	4.0933e+07	4.6242e+07	2.75904e+07	2.73645e+07	2.56971e+07	2.73915e+07	2.18421e+07	0.68	-0.56	5.20777e-05
Nicotinic acid	C6 H5 N O2	123.032	1.478	99.3	C00253	9.37078e+07	9.65712e+07	8.78447e+07	1.33686e+08	1.14046e+08	7.98191e+07	6.55262e+07	6.36414e+07	6.54595e+07	7.0509e+07	0.679	-0.56	0.00291895
Hydroxy-alpha-sanshool	C16 H25 N O2	263.188	6.938			6.13708e+06	3.54647e+06	5.02456e+06	4.83735e+06	4.43253e+06	4.1818e+06	3.2866e+06	3.20281e+06	3.33814e+06	2.4527e+06	0.679	-0.56	0.0160283
Fumaric acid	C4 H4 O4	116.009	7.069	93.1		1.19141e+07	1.07999e+07	9.70208e+06	1.06424e+07	7.98219e+06	7.20551e+06	5.9317e+06	8.44952e+06	6.84078e+06	9.33428e+06	0.677	-0.56	0.0198583
	C13 H26 N2 O3 S	290.166	5.537			1.14769e+07	9.32737e+06	7.61273e+06	1.03234e+07	9.14034e+06	6.66953e+06	5.18704e+06	6.00324e+06	6.86642e+06	6.30295e+06	0.676	-0.57	0.00125679
Octahydro-1,6,7,8-indolizinetetrol	C8 H15 N O4	189.1	1.178			3.05358e+07	2.53361e+07	1.74509e+07	3.46475e+07	2.71329e+07	1.61252e+07	1.82281e+07	2.25611e+07	1.82635e+07	1.24986e+07	0.672	-0.57	0.0233061
[(2R,3S,4S,5R,6R)-3,4,5-trihydroxy-6-{[(2S,3S,4R,5R)-4-hydroxy-2,5-bis(hydroxymethyl)-3-{[(2E)-3-(3,4,5-trimethoxyphenyl)prop-2-enoyl]oxy}oxolan-2-yl]oxy}oxan-2-yl]methyl 4-hydroxybenzoate	C31 H38 O17	704.177	1.166	82.1		2.95444e+07	4.02719e+07	4.88926e+07	4.02562e+07	5.62548e+07	2.70621e+07	2.43411e+07	3.89465e+07	2.92812e+07	2.43286e+07	0.672	-0.57	0.0228287
N-butanoyl-l-homoserine lactone	C8 H13 N O3	171.09	1.21			1.03619e+07	1.71746e+07	1.14656e+07	1.60714e+07	9.3501e+06	1.26591e+07	8.68011e+06	4.16554e+06	6.05965e+06	7.68221e+06	0.67	-0.58	0.047088
Citral	C10 H16 O	152.12	25.127	86.3	C01499	1.09856e+07	1.05358e+07	7.34001e+06	1.09871e+07	1.33764e+07	7.33481e+06	7.81403e+06	7.79736e+06	5.03963e+06	3.90073e+06	0.668	-0.58	0.0166164
	C13 H12 N3 O3 P	289.062	1.953			5.02999e+06	1.648e+07	4.15432e+06	4.19882e+06	9.3658e+06	2.36215e+06	3.3595e+06	3.46796e+06	3.38974e+06	3.00655e+06	0.668	-0.58	0.0429366
Hexadecanedioic acid	C16 H30 O4	286.214	14.05	89.7	C19615	3.23435e+07	2.01561e+07	1.98623e+07	1.98194e+07	2.07852e+07	1.58702e+07	1.33973e+07	1.28729e+07	1.43033e+07	9.91661e+06	0.665	-0.59	0.00301318
Decanophenone	C16 H24 O	232.183	22.09			1.7763e+07	1.63982e+07	1.97704e+07	2.31624e+07	2.72984e+07	1.31767e+07	1.31187e+07	1.62321e+07	9.0587e+06	1.08035e+07	0.664	-0.59	0.00508548
3-propylidene-Δ1- pyrroline-5-carboxylic acid	C8 H11 N O2	153.079	5.056			7.34914e+06	5.7126e+06	5.84171e+06	7.72421e+06	5.11568e+06	3.50791e+06	3.52167e+06	5.35881e+06	4.50515e+06	3.87671e+06	0.664	-0.59	0.00550479
		132.041	1.21			4.59488e+07	2.90814e+07	2.77597e+07	2.12339e+07	1.63582e+07	1.96323e+07	1.10223e+07	1.30528e+07	1.84362e+07	2.03053e+07	0.664	-0.59	0.0489956
	C14 H29 N9 O2 P2 S2	481.138	24.119			4.81602e+06	5.8448e+06	6.42042e+06	6.63296e+06	8.00083e+06	4.30134e+06	4.25338e+06	5.52358e+06	2.6998e+06	4.11179e+06	0.662	-0.59	0.0186203
(6RS,10RS)-6,10-dimethylbicyclo[4.4.0]dec-1-en-3-one	C12 H18 O	178.136	20.846			3.48584e+07	2.32312e+07	3.0093e+07	2.56502e+07	2.68881e+07	1.69419e+07	1.72918e+07	1.94496e+07	2.00442e+07	1.77081e+07	0.659	-0.6	0.00178734
Alepric acid	C14 H24 O2	224.178	24.722			1.32081e+07	1.39953e+07	1.46189e+07	1.35595e+07	1.69544e+07	1.00215e+07	7.93914e+06	9.1735e+06	1.17996e+07	5.93146e+06	0.655	-0.61	0.00965897
trimethylsilylmethyllithium	C4 H11 Li Si	94.0788	17.696			3.75546e+07	3.45414e+07	3.21082e+07	3.20929e+07	3.32537e+07	2.52615e+07	2.13977e+07	2.16994e+07	2.57223e+07	1.98831e+07	0.653	-0.62	0.000332111
Phenidone	C9 H10 N2 O	162.079	3.919			1.49356e+07	1.04737e+07	8.06656e+06	1.30005e+07	1.33387e+07	8.11438e+06	6.82089e+06	9.55688e+06	8.48462e+06	8.77083e+06	0.653	-0.62	0.0315014
3-hydroxy-dodecanedioic acid	C12 H22 O5	246.146	7.531			7.23624e+06	8.07689e+06	8.14831e+06	9.87211e+06	1.25452e+07	5.32484e+06	4.07793e+06	5.56695e+06	5.56973e+06	4.25381e+06	0.653	-0.61	0.001291
	C29 H41 Cl N4 O10 P2	702.199	1.172			1.63172e+07	1.62282e+07	1.97962e+07	2.54068e+07	2.95762e+07	1.37881e+07	1.28814e+07	1.5072e+07	1.07352e+07	1.07089e+07	0.651	-0.62	0.00912411
4,6-O-(1-Carboxyethylidene)hexopyranose	C9 H14 O8	250.069	4.375			1.5551e+07	1.014e+07	8.26917e+06	1.10761e+07	9.79453e+06	6.59465e+06	5.97449e+06	7.45981e+06	6.24529e+06	7.21322e+06	0.65	-0.62	0.00752932
3,4,7-Trimethyl-2E,6-octadien-1-ol	C11 H20 O	168.151	16.382			3.92515e+07	3.07017e+07	2.59304e+07	3.1469e+07	2.84413e+07	1.95019e+07	2.40703e+07	2.31433e+07	1.74413e+07	1.99119e+07	0.649	-0.62	0.00238016
2,5-dimethyl-2E-tridecenoic acid	C15 H28 O2	240.209	24.345			4.31484e+07	1.74055e+07	2.26005e+07	1.87288e+07	1.83156e+07	1.21333e+07	9.66007e+06	1.56776e+07	9.75197e+06	1.88336e+07	0.648	-0.63	0.0299521
	C11 H26 N8 O15 S	542.124	1.27			1.90322e+07	1.29813e+07	1.67019e+07	1.93686e+07	1.68961e+07	1.80241e+07	1.05904e+07	1.28394e+07	9.36807e+06	1.09554e+07	0.648	-0.63	0.041323
NP-002322	C18 H32 O4	294.219	23.671	82.6		1.23123e+07	9.46724e+06	9.18656e+06	1.06278e+07	9.93829e+06	7.66716e+06	6.09906e+06	9.27543e+06	6.33673e+06	6.43223e+06	0.647	-0.63	0.00566036
		82.0789	22.934			1.36541e+07	1.30963e+07	1.39044e+07	1.00813e+07	1.12452e+07	8.25353e+06	9.23789e+06	8.41692e+06	1.09296e+07	5.7055e+06	0.643	-0.64	0.0178048
12-hydroxy-10-dodecenoic acid	C12 H22 O3	214.157	12.1			1.04644e+08	1.01824e+08	8.87376e+07	1.34075e+08	1.4037e+08	6.32406e+07	6.9689e+07	7.63203e+07	4.09075e+07	6.70666e+07	0.641	-0.64	0.00310824
NP-020112	C30 H48 O2	422.355	12.209	91.7		2.58483e+07	2.52542e+07	1.74195e+07	2.90105e+07	1.91036e+07	1.32279e+07	1.63508e+07	1.29516e+07	1.77028e+07	1.61748e+07	0.64	-0.64	0.00938395
	C8 H15 Cl N10 O3	334.103	1.192			4.74994e+06	5.13755e+06	3.90195e+06	7.99347e+06	7.43658e+06	3.2811e+06	4.03461e+06	5.25941e+06	3.28663e+06	2.67297e+06	0.64	-0.64	0.0378414
	C12 H20 O7 S	308.093	5.312			1.27169e+07	1.54749e+07	2.25026e+07	1.34944e+07	1.09456e+07	7.44982e+06	1.1098e+07	6.11583e+06	1.20966e+07	8.62901e+06	0.639	-0.65	0.0207711
Midodrine	C12 H18 N2 O4	254.127	4.779			2.93649e+07	3.08115e+07	1.7821e+07	4.23907e+07	3.55064e+07	1.54978e+07	2.50179e+07	1.43927e+07	2.0752e+07	1.95471e+07	0.634	-0.66	0.0305615
Choline	C5 H13 N O	103.1	1.092	96.6	C00114	6.2792e+09	4.81073e+09	6.73351e+09	6.76779e+09	6.65804e+09	4.22291e+09	4.21482e+09	4.39094e+09	6.9207e+09	3.76272e+09	0.634	-0.66	0.0477582
	C15 H19 N O4 S	309.103	12.097			1.02464e+07	1.07867e+07	9.74472e+06	1.36355e+07	1.34498e+07	6.67394e+06	7.33027e+06	8.09861e+06	4.26121e+06	6.83599e+06	0.634	-0.66	0.00367576
Alepric acid	C14 H24 O2	224.178	19.415			2.42654e+07	2.37331e+07	2.07688e+07	2.26278e+07	2.2934e+07	1.4525e+07	1.50155e+07	1.38853e+07	1.2429e+07	1.47734e+07	0.633	-0.66	5.73336e-06
	C22 H37 N3 O5	423.273	6.949			1.52718e+07	1.42861e+07	1.11314e+07	1.82224e+07	2.10396e+07	8.52088e+06	1.27982e+07	1.10739e+07	9.67396e+06	7.69404e+06	0.633	-0.66	0.0112532
		68.0634	23.671			1.08662e+07	9.32689e+06	1.0589e+07	1.2704e+07	1.39968e+07	6.87974e+06	7.45811e+06	6.53277e+06	4.61476e+06	9.98539e+06	0.633	-0.66	0.0113682
	C10 H27 N4 P	234.198	23.003			1.04903e+07	8.16548e+06	7.09785e+06	8.43268e+06	8.16236e+06	5.14516e+06	4.89983e+06	5.47983e+06	2.69734e+06	5.13071e+06	0.628	-0.67	0.00591962
NP-020535	C16 H22 O4	260.139	16.651	83.9		1.40102e+07	1.87722e+07	1.44077e+07	2.16694e+07	2.24489e+07	1.17631e+07	1.59703e+07	1.19993e+07	6.13342e+06	5.8006e+06	0.627	-0.67	0.0319645
3,10-dihydroxydecanoic acid	C10 H20 O4	204.135	7.233			3.21119e+06	3.96524e+06	5.79176e+06	4.4113e+06	4.52235e+06	2.95049e+06	2.61451e+06	2.76697e+06	3.72143e+06	2.48873e+06	0.627	-0.67	0.0109834
	C25 H43 N3 S2	449.289	7.213			1.58073e+07	2.57654e+07	2.72745e+07	1.66554e+07	2.15449e+07	1.1923e+07	1.47938e+07	1.6599e+07	1.3482e+07	1.29503e+07	0.626	-0.68	0.0165059
(3S*,4S*)-3,4-dihydroxy-7-methyl-3,4-dihydro-1(2H)-naphthalenone	C11 H12 O3	192.079	6.587			1.50979e+07	1.2509e+07	7.46445e+06	1.20882e+07	1.0859e+07	1.09164e+07	7.73047e+06	6.81524e+06	7.55604e+06	6.99933e+06	0.625	-0.68	0.0393919
	C9 H17 N4 O2 P S	276.082	1.172			5.15825e+07	4.31788e+07	4.35092e+07	4.25796e+07	6.09083e+07	2.53671e+07	3.11754e+07	3.60051e+07	2.70498e+07	1.89395e+07	0.622	-0.69	0.00321757
	C15 H30 N4 O3	314.232	7.355			1.89339e+07	1.21206e+07	1.13525e+07	1.12655e+07	1.2379e+07	8.61312e+06	5.88437e+06	7.52803e+06	8.64698e+06	7.18185e+06	0.621	-0.69	0.00233908
Bengamide E	C18 H32 N2 O6	372.226	5.916			4.93603e+06	3.8409e+06	2.64034e+06	4.04959e+06	3.84105e+06	2.38019e+06	2.00899e+06	3.5112e+06	1.78079e+06	2.38854e+06	0.62	-0.69	0.0144512
3,4,7-Trimethyl-2E,6-octadien-1-ol	C11 H20 O	168.151	12.089			1.50381e+07	1.5066e+07	1.28288e+07	1.92803e+07	1.98594e+07	8.72014e+06	1.02619e+07	1.08496e+07	5.94892e+06	9.33966e+06	0.62	-0.69	0.00229726
		79.9248	1.123			1.21777e+07	1.12507e+07	8.0112e+06	1.30721e+07	1.33932e+07	6.84279e+06	7.55399e+06	6.57626e+06	7.63106e+06	7.85954e+06	0.62	-0.69	0.00609402
(2Z)-5-(1,2,4a,5-tetramethyl-7-oxo-1,2,3,4,4a,7,8,8a-octahydronaphthalen-1-yl)-3-methylpent-2-enoic acid	C20 H30 O3	340.199	24.413	90.4		6.1174e+07	6.5258e+07	6.10932e+07	7.77386e+07	1.01104e+08	4.27046e+07	4.04099e+07	5.40854e+07	2.36554e+07	4.00444e+07	0.619	-0.69	0.00720829
2R-aminoheptanoic acid	C7 H15 N O2	145.11	1.716			1.50394e+08	1.16695e+08	7.77899e+07	1.17918e+08	1.06461e+08	7.20774e+07	5.30453e+07	8.14173e+07	8.4314e+07	6.34405e+07	0.618	-0.7	0.00973237
L-alpha-Glycerylphosphorylcholine	C8 H20 N O6 P	257.103	1.088			9.56369e+08	1.23248e+09	6.89447e+08	9.75544e+08	1.02248e+09	5.70089e+08	6.55421e+08	8.19769e+08	6.01075e+08	5.10387e+08	0.616	-0.7	0.00841038
		80.0632	22.93			2.94925e+07	2.99174e+07	3.17372e+07	2.22651e+07	2.46935e+07	1.82799e+07	1.72993e+07	1.81789e+07	2.11811e+07	1.47186e+07	0.616	-0.7	0.00132409
4-keto pentadecanoic acid	C15 H28 O3	256.204	24.722			1.35043e+07	1.53846e+07	1.53483e+07	1.56986e+07	2.02928e+07	9.45137e+06	7.32025e+06	9.83062e+06	1.07667e+07	4.50354e+06	0.614	-0.7	0.00880911
	C13 H22 N6 O	278.186	24.717			1.35043e+07	1.53846e+07	1.53483e+07	1.56986e+07	2.02928e+07	9.45137e+06	7.32025e+06	9.83062e+06	1.07667e+07	4.50354e+06	0.614	-0.7	0.00880911
N-pentanoyl-homoserine lactone	C9 H15 N O3	185.105	1.212			3.14999e+07	2.89207e+07	1.74506e+07	3.19288e+07	2.63121e+07	1.53807e+07	1.77275e+07	2.2356e+07	1.94963e+07	1.52885e+07	0.613	-0.71	0.02009
Acetyl-L-carnitine	C9 H17 N O4	203.116	1.234	97.5		4.85852e+08	3.40608e+08	1.85472e+08	2.65073e+08	2.2189e+08	1.79263e+08	1.62498e+08	2.32321e+08	8.31306e+07	1.51301e+08	0.613	-0.71	0.0339406
Suspensolide	C12 H18 O2	194.131	8.465			1.50104e+07	9.76344e+06	7.877e+06	1.08869e+07	1.40773e+07	6.65736e+06	5.78515e+06	7.41716e+06	6.79378e+06	5.56336e+06	0.612	-0.71	0.00608951
(2S)-5-acetamidopentyl 2-hydroxypropanoate	C10 H19 N O4	217.131	4.697			5.89e+06	5.47279e+06	4.72925e+06	5.86524e+06	6.09228e+06	2.69242e+06	3.33299e+06	4.82876e+06	4.21816e+06	3.5818e+06	0.611	-0.71	0.00968963
	C14 H21 N4 O7 P	388.115	7.337			3.29245e+06	2.86492e+06	1.97481e+06	2.5207e+06	8.49554e+06	1.81377e+06	1.75139e+06	923880	2.13302e+06	1.02696e+06	0.611	-0.71	0.0287577
14-hydroxy-12-tetradecenoic acid	C14 H26 O3	242.188	22.93			3.10008e+07	3.17344e+07	2.07727e+07	2.23006e+07	2.59373e+07	1.74456e+07	1.4861e+07	1.58279e+07	1.76809e+07	1.03617e+07	0.61	-0.71	0.00286842
	C16 H24 N4 O9	416.153	1.21			1.78433e+07	2.98566e+07	4.03222e+07	2.46509e+07	6.26822e+07	1.60787e+07	1.81782e+07	2.12473e+07	2.0849e+07	1.25307e+07	0.609	-0.72	0.0455564
FR-900148	C10 H15 Cl N2 O5	278.067	4.214			6.019e+06	7.01563e+06	4.47185e+06	8.2016e+06	9.29555e+06	4.26815e+06	5.14888e+06	6.33128e+06	4.25935e+06	3.62028e+06	0.608	-0.72	0.0462006
9,12-hexadecadienoic acid	C16 H28 O2	252.209	23.467			1.08831e+07	8.5149e+06	8.29274e+06	1.12865e+07	1.04155e+07	6.27933e+06	6.49798e+06	6.0311e+06	4.80283e+06	7.05467e+06	0.603	-0.73	0.000785015
Palmitoleic Acid	C16 H30 O2	276.209	23.678	71.2		2.20232e+07	1.64114e+07	1.8705e+07	1.76069e+07	1.62955e+07	1.16388e+07	1.02207e+07	1.27321e+07	8.2646e+06	1.05917e+07	0.602	-0.73	0.000480884
Bacillamidin B	C19 H35 N O5	357.251	8.157			6.99639e+06	8.11411e+06	4.82311e+06	9.81873e+06	6.28479e+06	6.08419e+06	4.19348e+06	5.47702e+06	4.12627e+06	3.49991e+06	0.599	-0.74	0.0271806
Cephalosporolide J	C10 H16 O5	216.099	6.161			8.79427e+06	7.48555e+06	6.60802e+06	9.50927e+06	8.8767e+06	4.37917e+06	3.85861e+06	7.06488e+06	5.5894e+06	5.24801e+06	0.597	-0.74	0.00701822
Methyl 2-acetamido-2-deoxy-beta-D-glucopyranoside	C9 H17 N O6	235.106	1.163			3.02242e+07	3.33081e+07	1.58131e+07	4.14826e+07	2.39373e+07	1.80129e+07	1.46977e+07	2.17742e+07	1.90928e+07	1.04311e+07	0.596	-0.75	0.0376623
N-Methyl-2-pyrrolidone	C5 H9 N O	99.0689	4.252	99.1	C11118	5.54131e+07	4.07875e+07	6.24546e+07	1.50792e+08	6.16381e+07	1.14631e+07	3.66948e+07	3.88281e+07	3.87601e+07	3.11032e+07	0.595	-0.75	0.0304025
4,6-Decadiyn-1-ol	C10 H14 O	150.105	23.67			1.78767e+07	1.64841e+07	1.284e+07	1.35126e+07	1.40082e+07	1.05958e+07	7.92061e+06	8.9321e+06	7.52977e+06	8.31478e+06	0.594	-0.75	0.000233714
3,4,7,11-Tetramethyl-6E,10Z-tridecadienal	C17 H30 O	250.23	24.349			1.10244e+07	1.06109e+07	1.14153e+07	1.50115e+07	1.78925e+07	6.78623e+06	6.1669e+06	8.82269e+06	4.48927e+06	7.03237e+06	0.594	-0.75	0.00184211
(DES-TYR1)-LEU-ENKEPHALIN	C19 H28 N4 O5	392.206	6.127			1.08539e+07	1.04965e+07	1.73994e+07	1.51338e+07	2.31498e+07	7.93475e+06	1.21541e+07	7.32257e+06	9.97005e+06	8.98706e+06	0.594	-0.75	0.0297195
14-hydroxy-12-tetradecenoic acid	C14 H26 O3	242.188	19.409			4.06536e+07	3.79775e+07	3.32513e+07	4.06918e+07	4.05228e+07	2.1815e+07	2.44248e+07	2.48986e+07	1.56783e+07	2.4003e+07	0.592	-0.76	0.00127685
	C7 H21 N4 O3 P	240.136	7.246			8.48692e+06	8.32273e+06	9.02331e+06	7.77778e+06	6.75487e+06	5.4154e+06	3.82448e+06	5.75854e+06	4.91281e+06	3.93815e+06	0.59	-0.76	0.00109039
Dodecanedioic acid	C12 H22 O4	230.151	10.52	85.5	C02678	3.63234e+07	3.73267e+07	2.06301e+07	2.81162e+07	2.60824e+07	1.9792e+07	1.3408e+07	2.05444e+07	1.3343e+07	1.64929e+07	0.587	-0.77	0.00446652
(Z)-12,13-dihydroxyoctadec-9-enoic acid	C18 H34 O4	296.235	22.878	98		4.70428e+07	4.09889e+07	3.92649e+07	2.75721e+07	2.65047e+07	2.60495e+07	2.34015e+07	2.29513e+07	1.62479e+07	2.30037e+07	0.586	-0.77	0.0111646
9,12-hexadecadienoic acid	C16 H28 O2	252.209	23.001			2.45211e+07	1.73755e+07	1.49076e+07	2.01268e+07	1.80231e+07	9.75496e+06	1.11313e+07	1.06429e+07	7.26867e+06	1.05493e+07	0.585	-0.77	0.000425989
	C22 H37 N3 O5	423.273	7.081			1.24774e+07	7.94831e+06	7.17426e+06	1.14735e+07	9.66597e+06	5.50106e+06	5.65284e+06	7.27754e+06	5.30965e+06	6.28789e+06	0.585	-0.77	0.00734462
(2S)-5-acetamidopentyl 2-hydroxypropanoate	C10 H19 N O4	217.132	4.852			3.08487e+06	2.29943e+06	1.46757e+06	2.67493e+06	3.50696e+06	1.17665e+06	1.73106e+06	1.29423e+06	1.75894e+06	1.55643e+06	0.582	-0.78	0.0219766
alpha-hydroxy lauric acid	C12 H24 O3	216.172	17.943			8.90784e+07	4.02723e+07	3.42604e+07	4.77455e+07	3.43071e+07	2.1801e+07	2.34122e+07	2.15625e+07	2.7732e+07	3.14721e+07	0.581	-0.78	0.0226572
9Z,11E,13-Tetradecatrienal	C14 H22 O	206.167	23.026			3.86397e+07	2.08031e+07	2.56934e+07	1.48485e+07	1.6687e+07	1.20926e+07	9.64496e+06	1.33622e+07	1.30764e+07	1.1289e+07	0.581	-0.78	0.0184277
	C21 H30 N4 O4 S	434.2	25.133			1.41183e+07	1.29276e+07	1.3043e+07	1.60003e+07	1.56067e+07	9.5764e+06	7.93643e+06	9.4471e+06	6.09271e+06	8.19091e+06	0.58	-0.79	0.000834843
6-Methylquinoline	C10 H9 N	143.074	7.657	72.8		1.29489e+07	9.89554e+06	9.75252e+06	9.57205e+06	9.88609e+06	4.40157e+06	6.83189e+06	5.68415e+06	1.0175e+07	5.71042e+06	0.578	-0.79	0.0196051
trimethylsilylmethyllithium	C4 H11 Li Si	94.0788	22.928			9.95927e+07	8.41928e+07	8.61223e+07	6.38426e+07	7.36482e+07	5.54921e+07	4.83553e+07	4.72608e+07	6.52387e+07	3.73069e+07	0.574	-0.8	0.00419791
		180.062	1.18			2.13307e+08	2.02874e+08	1.94567e+08	2.41295e+08	2.2861e+08	1.1859e+08	1.03699e+08	1.22114e+08	1.34178e+08	1.42374e+08	0.572	-0.8	5.88487e-05
Pimelic acid	C7 H12 O4	160.072	5.664	99.4		1.45161e+07	1.02996e+07	8.2992e+06	1.07525e+07	9.12248e+06	6.98801e+06	5.35358e+06	5.88249e+06	7.02533e+06	5.80469e+06	0.571	-0.81	0.00265852
5,8-tetradecadienal	C14 H24 O	208.183	24.35			2.16666e+07	8.76277e+06	1.22871e+07	9.22826e+06	9.09349e+06	5.27346e+06	4.63637e+06	7.81686e+06	4.23486e+06	9.23463e+06	0.571	-0.81	0.0214599
5-methyl-2-undecenoic acid	C12 H22 O2	198.162	10.752			3.09113e+07	2.43828e+07	1.99604e+07	1.77488e+07	1.44826e+07	8.6659e+06	1.25919e+07	8.98753e+06	1.13593e+07	1.29038e+07	0.569	-0.81	0.00403133
4,6,11-hexadecatrienal	C16 H26 O	234.198	22.605			1.16734e+07	8.85748e+06	7.21649e+06	9.46553e+06	8.85727e+06	3.94201e+06	5.02802e+06	4.992e+06	3.82757e+06	5.92416e+06	0.564	-0.83	0.000362658
	C10 H14 N10 O3 S	354.097	1.125			1.29034e+07	1.43738e+07	9.05535e+06	1.83306e+07	1.00081e+07	7.27275e+06	6.65248e+06	4.79319e+06	9.51627e+06	8.30554e+06	0.564	-0.83	0.0112
Serpulanine A	C14 H18 N2 O4	278.127	5.854			3.44725e+07	5.68905e+07	2.41635e+07	5.59509e+07	4.55949e+07	2.11494e+07	3.152e+07	2.07137e+07	2.81503e+07	2.56693e+07	0.563	-0.83	0.0337441
6-amino-hexanoic acid	C6 H13 N O2	131.095	1.172			8.92679e+08	5.60793e+08	3.9119e+08	6.19549e+08	5.78217e+08	2.8034e+08	3.25824e+08	4.57886e+08	4.44387e+08	2.06531e+08	0.563	-0.83	0.0193675
1-fluoro-2-methanesulfinylbenzene	C7 H7 F O S	158.02	2.74			7.83417e+08	3.5413e+08	2.93642e+08	3.9275e+08	4.3495e+08	2.20359e+08	2.21194e+08	3.35633e+08	2.62227e+08	1.35857e+08	0.563	-0.83	0.0216556
glu-gly-glu-glu	C17 H26 N4 O11	462.158	1.211			3.88138e+07	6.37545e+07	6.36936e+07	6.1901e+07	1.05059e+08	2.99896e+07	4.2573e+07	5.43994e+07	3.57939e+07	2.52709e+07	0.562	-0.83	0.027589
2-Amino-1-cyclohexyl-1,2,5-trideoxy-5-(4-morpholinyl)-L-arabinitol	C15 H30 N2 O3	286.225	7.52			5.58751e+07	2.50726e+07	2.97926e+07	3.47663e+07	4.11077e+07	2.59706e+07	1.6492e+07	2.72866e+07	1.95484e+07	8.39953e+06	0.562	-0.83	0.0305831
	C26 H37 N7 O17	719.225	1.144			1.02166e+07	1.11036e+07	1.10342e+07	1.96881e+07	2.1402e+07	9.75944e+06	6.2437e+06	1.20669e+07	3.97903e+06	5.28439e+06	0.562	-0.83	0.0265728
	C20 H30 Cl N3 O3	395.197	25.114			3.86389e+07	3.58095e+07	2.596e+07	4.60988e+07	5.14944e+07	2.70095e+07	2.16773e+07	2.57167e+07	1.78068e+07	1.90938e+07	0.561	-0.83	0.00550049
	C13 H31 N8 O3 P	378.225	6.071			1.7514e+07	1.51118e+07	1.2653e+07	1.50892e+07	1.28538e+07	9.51185e+06	8.32856e+06	9.2157e+06	7.2481e+06	8.46352e+06	0.561	-0.83	0.000145355
	C22 H25 N9 O4 S2	543.146	1.138			4.26384e+06	3.85243e+06	6.09799e+06	8.12618e+06	1.11516e+07	4.05533e+06	2.37189e+06	4.76428e+06	1.87488e+06	3.41433e+06	0.56	-0.84	0.0312783
	C22 H25 N2 O3 P	396.16	24.372			6.5399e+07	5.99403e+07	6.30289e+07	7.10299e+07	8.5237e+07	3.6554e+07	3.16491e+07	4.95959e+07	1.48354e+07	3.99526e+07	0.559	-0.84	0.0187363
Venezueline G	C10 H13 N O3	195.089	5.058			7.72768e+07	6.5478e+07	7.54215e+07	7.26214e+07	5.82914e+07	3.72061e+07	3.6964e+07	4.74737e+07	4.04227e+07	4.30655e+07	0.557	-0.85	6.90666e-05
Eucalyptol	C10 H18 O	136.125	23.67	62.6		1.8022e+07	1.67871e+07	2.11144e+07	1.99297e+07	2.87386e+07	1.30226e+07	1.10922e+07	1.21136e+07	8.98178e+06	8.9565e+06	0.557	-0.85	0.000716501
N-[5-(2-formyl-5-hydroxymethyl-pyrrol-1-yl)-pentyl]-acetamide	C13 H20 N2 O3	252.147	6.263			1.06207e+07	8.3631e+06	8.42586e+06	9.51722e+06	7.99421e+06	4.6884e+06	4.26884e+06	5.23544e+06	4.25218e+06	5.46788e+06	0.556	-0.85	2.56182e-05
Alepric acid	C14 H24 O2	224.178	22.929			1.64538e+07	1.83241e+07	1.88896e+07	1.24702e+07	1.38268e+07	1.02149e+07	8.11004e+06	9.1415e+06	1.20849e+07	7.03654e+06	0.556	-0.85	0.00230619
9Z,11E,13-Tetradecatrienal	C14 H22 O	206.167	24.721			1.85058e+07	2.26177e+07	2.24856e+07	2.19476e+07	2.73072e+07	1.31641e+07	9.47272e+06	1.24968e+07	1.82839e+07	7.03918e+06	0.556	-0.85	0.0111156
Dendryphiellic acid A	C9 H14 O2	154.099	9.328			9.56541e+06	9.87064e+06	1.23575e+07	1.36262e+07	1.78282e+07	6.8513e+06	6.84411e+06	7.96292e+06	5.27275e+06	5.42386e+06	0.554	-0.85	0.00203271
2-hydroxy palmitic acid	C16 H32 O3	272.235	22.906			5.32431e+07	3.70019e+07	6.13139e+07	2.31239e+07	2.32277e+07	2.36193e+07	1.84453e+07	1.41131e+07	2.45273e+07	2.04733e+07	0.553	-0.85	0.036991
4,7,10-hexadecatrienoic acid	C16 H26 O2	250.193	21.748			1.24011e+07	8.30255e+06	7.09672e+06	9.27129e+06	8.65243e+06	4.59102e+06	5.50151e+06	4.77546e+06	3.30128e+06	6.08119e+06	0.552	-0.86	0.00183348
N,N-diethyl-3-hydroxybut-2-enamide	C8 H15 N O2	157.11	5.085			2.90986e+07	2.12079e+07	1.3223e+07	1.84961e+07	1.59165e+07	1.01612e+07	8.26734e+06	1.18854e+07	9.00328e+06	1.05339e+07	0.549	-0.86	0.00529155
Matsudipeptide A	C11 H16 N2 O4	240.111	5.214			9.84249e+06	9.52528e+06	4.75832e+06	1.38476e+07	1.15733e+07	3.87014e+06	5.38902e+06	5.44023e+06	5.26802e+06	5.49594e+06	0.548	-0.87	0.0239686
Tetradecanedioic acid	C14 H26 O4	258.183	9.088	77.2		2.96937e+07	1.45567e+07	1.31287e+07	1.23264e+07	1.02578e+07	8.24278e+06	6.33284e+06	7.16615e+06	7.98627e+06	6.31102e+06	0.546	-0.87	0.0137932
14-hydroxy-12-tetradecenoic acid	C14 H26 O3	242.188	18.701			8.2883e+07	7.24065e+07	6.25158e+07	7.74988e+07	7.10501e+07	3.62626e+07	3.95039e+07	4.10674e+07	2.22527e+07	4.01146e+07	0.546	-0.87	0.00162046
3,7,11-Trimethyl-6E,10-dodecadien-1-ol	C15 H28 O	224.214	22.999			1.90041e+07	1.36113e+07	1.08933e+07	1.50218e+07	1.32523e+07	6.57774e+06	7.40645e+06	8.07167e+06	4.13164e+06	8.08422e+06	0.544	-0.88	0.00164714
Aleprylic acid	C12 H20 O2	196.146	12.176			5.95339e+07	6.12709e+07	5.4303e+07	7.53818e+07	7.48292e+07	3.32866e+07	3.55361e+07	3.87748e+07	2.40944e+07	2.62224e+07	0.543	-0.88	0.000279214
[truncated: 538 more rows]
